# Supplementary material
Source: Research Square preprint supplement (doi:10.21203/rs.3.rs-9625276/v1)
Supplement: Supplementary file 1 [file 5a85f4d831a5bb6e0ad0d231.xlsx]

## Sheet: Table S1
Supplementary File, Table S1. The list of genes in each module.
ENSEMBL	SYMBOL	Module_Number	Module_Color			Module_Color	Number_of_Genes
ENSBTAG00000000210	ARHGAP31	7	black			grey	557
ENSBTAG00000000261	FAM228A	7	black			turquoise	234
ENSBTAG00000000697	RRP8	7	black			blue	169
ENSBTAG00000001024	ARID1A	7	black			brown	158
ENSBTAG00000001506	HTT	7	black			yellow	134
ENSBTAG00000001529	NSD3	7	black			green	106
ENSBTAG00000001737	TUT7	7	black			red	81
ENSBTAG00000002036	CACNB1	7	black			black	67
ENSBTAG00000002037	ATXN7L1	7	black			pink	60
ENSBTAG00000002174	RERG	7	black			magenta	36
ENSBTAG00000002440	KIF7	7	black
ENSBTAG00000004330	ENO4	7	black
ENSBTAG00000004570	PRRX1	7	black
ENSBTAG00000004971	GRAMD1C	7	black
ENSBTAG00000005580	SZT2	7	black
ENSBTAG00000005842	ABCC10	7	black
ENSBTAG00000006359	EPHA1	7	black
ENSBTAG00000007643	LOC615278	7	black
ENSBTAG00000008300	FN1	7	black
ENSBTAG00000008762	HECTD4	7	black
ENSBTAG00000008821	SEPHS1	7	black
ENSBTAG00000008862	GOLGB1	7	black
ENSBTAG00000009098	POLG	7	black
ENSBTAG00000009773	KREMEN1	7	black
ENSBTAG00000010247	FKTN	7	black
ENSBTAG00000010509	CDK3	7	black
ENSBTAG00000010616	MBD6	7	black
ENSBTAG00000011593	QKI	7	black
ENSBTAG00000011761	LRP6	7	black
ENSBTAG00000012577	UVSSA	7	black
ENSBTAG00000013060	IQGAP1	7	black
ENSBTAG00000013204	ATP13A3	7	black
ENSBTAG00000013801	PBX1	7	black
ENSBTAG00000013821	RIOK1	7	black
ENSBTAG00000014191	QSOX1	7	black
ENSBTAG00000014447	RPS6KA1	7	black
ENSBTAG00000014752	AKAP11	7	black
ENSBTAG00000014766	SRSF1	7	black
ENSBTAG00000014829	MYRFL	7	black
ENSBTAG00000014855	MICAL2	7	black
ENSBTAG00000014945	IQSEC2	7	black
ENSBTAG00000015273	CAND2	7	black
ENSBTAG00000015662	IMPG2	7	black
ENSBTAG00000016316	ZZEF1	7	black
ENSBTAG00000016691	LACC1	7	black
ENSBTAG00000016990	USP24	7	black
ENSBTAG00000017251	SLC26A8	7	black
ENSBTAG00000017442	CDO1	7	black
ENSBTAG00000017713	KTN1	7	black
ENSBTAG00000018043	LCAT	7	black
ENSBTAG00000018348	CBLL1	7	black
ENSBTAG00000019798	PIGR	7	black
ENSBTAG00000024199	KMT2C	7	black
ENSBTAG00000025426	NSD1	7	black
ENSBTAG00000025964	MAST4	7	black
ENSBTAG00000026995	PNN	7	black
ENSBTAG00000030190	COL6A3	7	black
ENSBTAG00000032087	ATXN2L	7	black
ENSBTAG00000035110	DEUP1	7	black
ENSBTAG00000036113	RSPH14	7	black
ENSBTAG00000037756	TET1	7	black
ENSBTAG00000037819	SFT2D2	7	black
ENSBTAG00000038316	GPATCH8	7	black
ENSBTAG00000040076	ILF3	7	black
ENSBTAG00000040088	SLC9B2	7	black
ENSBTAG00000051215	AGBL2	7	black
ENSBTAG00000051831	CHD2	7	black
ENSBTAG00000000033	PHOSPHO1	2	blue
ENSBTAG00000000265	SYNPR	2	blue
ENSBTAG00000000295	CLHC1	2	blue
ENSBTAG00000000533	ZNF684	2	blue
ENSBTAG00000000960	SPATA25	2	blue
ENSBTAG00000001032	PYGM	2	blue
ENSBTAG00000001093	KLHL23	2	blue
ENSBTAG00000001120	CORO6	2	blue
ENSBTAG00000001247	LECT2	2	blue
ENSBTAG00000001464	GPR156	2	blue
ENSBTAG00000001603	YIPF7	2	blue
ENSBTAG00000001790	SAFB2	2	blue
ENSBTAG00000001904	ZNF276	2	blue
ENSBTAG00000002260	NCAPD3	2	blue
ENSBTAG00000002468	RPS28	2	blue
ENSBTAG00000002566	PGPEP1	2	blue
ENSBTAG00000002648	RPS18	2	blue
ENSBTAG00000003120	ZNF385B	2	blue
ENSBTAG00000003130	CHRNA3	2	blue
ENSBTAG00000003321	DNAAF6	2	blue
ENSBTAG00000003491	SLC25A23	2	blue
ENSBTAG00000003514	HSF4	2	blue
ENSBTAG00000003576	POLL	2	blue
ENSBTAG00000004780	CDKL1	2	blue
ENSBTAG00000005092	ROR2	2	blue
ENSBTAG00000005211	RPL4	2	blue
ENSBTAG00000005313	EPHB3	2	blue
ENSBTAG00000005354	LRRFIP1	2	blue
ENSBTAG00000005803	PTPDC1	2	blue
ENSBTAG00000006409	LRRC34	2	blue
ENSBTAG00000006434	SYNPO2	2	blue
ENSBTAG00000006712	ECPAS	2	blue
ENSBTAG00000006883	EIF4B	2	blue
ENSBTAG00000007074	ZKSCAN8	2	blue
ENSBTAG00000007110	RCOR3	2	blue
ENSBTAG00000007368	MAN2C1	2	blue
ENSBTAG00000007393	RND2	2	blue
ENSBTAG00000007480	CIRBP	2	blue
ENSBTAG00000007608	BMT2	2	blue
ENSBTAG00000007609	ITFG2	2	blue
ENSBTAG00000007617	TERF2	2	blue
ENSBTAG00000007743	PUS7	2	blue
ENSBTAG00000007835	GPT	2	blue
ENSBTAG00000007916	FOXJ1	2	blue
ENSBTAG00000008222	EEF2KMT	2	blue
ENSBTAG00000008349	ZNF311	2	blue
ENSBTAG00000008350	KLHL21	2	blue
ENSBTAG00000008466	CCNB1IP1	2	blue
ENSBTAG00000008902	ZNF345	2	blue
ENSBTAG00000008920	ATP1B4	2	blue
ENSBTAG00000008981	USP49	2	blue
ENSBTAG00000009328	NWD1	2	blue
ENSBTAG00000009376	DPH1	2	blue
ENSBTAG00000009439	EDRF1	2	blue
ENSBTAG00000009703	MYH7	2	blue
ENSBTAG00000009719	CALHM2	2	blue
ENSBTAG00000009757	RPSA	2	blue
ENSBTAG00000009861	FRS3	2	blue
ENSBTAG00000009907	MAPK4	2	blue
ENSBTAG00000010372	MTMR7	2	blue
ENSBTAG00000010394	MCF2L2	2	blue
ENSBTAG00000010745	THRA	2	blue
ENSBTAG00000010795	ATG14	2	blue
ENSBTAG00000010924	LETMD1	2	blue
ENSBTAG00000010993	ZNF839	2	blue
ENSBTAG00000011209	SYT11	2	blue
ENSBTAG00000011456	NT5C3B	2	blue
ENSBTAG00000011473	MYL9	2	blue
ENSBTAG00000011558	GPAT2	2	blue
ENSBTAG00000011575	RFNG	2	blue
ENSBTAG00000012109	EDN3	2	blue
ENSBTAG00000012267	ZFC3H1	2	blue
ENSBTAG00000012407	FOXA2	2	blue
ENSBTAG00000012708	SERPINI1	2	blue
ENSBTAG00000012939	DTNBP1	2	blue
ENSBTAG00000012957	SERBP1	2	blue
ENSBTAG00000012969	DKK2	2	blue
ENSBTAG00000012990	PUS1	2	blue
ENSBTAG00000013015	CCDC13	2	blue
ENSBTAG00000013110	FARP2	2	blue
ENSBTAG00000013346	SIX5	2	blue
ENSBTAG00000013465	NXPE3	2	blue
ENSBTAG00000013509	TTC16	2	blue
ENSBTAG00000013674	EDNRA	2	blue
ENSBTAG00000014359	DRAXIN	2	blue
ENSBTAG00000014476	ADAL	2	blue
ENSBTAG00000014506	ZNF503	2	blue
ENSBTAG00000014831	PPP1R3C	2	blue
ENSBTAG00000015061	LOC617141	2	blue
ENSBTAG00000015261	CARD14	2	blue
ENSBTAG00000015286	GOLGA1	2	blue
ENSBTAG00000015316	NPM1	2	blue
ENSBTAG00000015432	TMEM231	2	blue
ENSBTAG00000015473	RPS27A	2	blue
ENSBTAG00000015598	RPS10	2	blue
ENSBTAG00000015669	ADAT1	2	blue
ENSBTAG00000015989	RPS5	2	blue
ENSBTAG00000016062	C21H14orf28	2	blue
ENSBTAG00000016174	NCL	2	blue
ENSBTAG00000016362	POU6F1	2	blue
ENSBTAG00000016574	RGS11	2	blue
ENSBTAG00000016592	CAPN15	2	blue
ENSBTAG00000016684	ZNF202	2	blue
ENSBTAG00000016784	DNAH7	2	blue
ENSBTAG00000017031	ERICH3	2	blue
ENSBTAG00000017823	CFAP52	2	blue
ENSBTAG00000018320	RPLP1	2	blue
ENSBTAG00000018452	ANKRA2	2	blue
ENSBTAG00000018770	HSDL1	2	blue
ENSBTAG00000018800	RPS4X	2	blue
ENSBTAG00000018833	SVOP	2	blue
ENSBTAG00000019093	AMY2B	2	blue
ENSBTAG00000019147	RPS20	2	blue
ENSBTAG00000019209	RAD1	2	blue
ENSBTAG00000019244	P2RX6	2	blue
ENSBTAG00000019310	FOXK1	2	blue
ENSBTAG00000019362	NOA1A	2	blue
ENSBTAG00000019563	C5H22orf23	2	blue
ENSBTAG00000019651	TRIM52	2	blue
ENSBTAG00000019692	BCL2L2	2	blue
ENSBTAG00000019864	MAPK15	2	blue
ENSBTAG00000020017	SLC25A41	2	blue
ENSBTAG00000020247	ADCYAP1R1	2	blue
ENSBTAG00000020943	CTU2	2	blue
ENSBTAG00000021058	DDX42	2	blue
ENSBTAG00000021135	RMI1	2	blue
ENSBTAG00000021140	RMND5A	2	blue
ENSBTAG00000021145	MAP4K1	2	blue
ENSBTAG00000021164	SLMAP	2	blue
ENSBTAG00000021211	DPT	2	blue
ENSBTAG00000021217	COL11A1	2	blue
ENSBTAG00000022699	CAV3	2	blue
ENSBTAG00000025136	MYOZ3	2	blue
ENSBTAG00000025931	NEU3	2	blue
ENSBTAG00000026977	PTPRQ	2	blue
ENSBTAG00000030333	AOC3	2	blue
ENSBTAG00000030667	ODAD1	2	blue
ENSBTAG00000030669	FGGY	2	blue
ENSBTAG00000030993	LCA5L	2	blue
ENSBTAG00000031351	SEC14L4	2	blue
ENSBTAG00000033254	PJVK	2	blue
ENSBTAG00000033545	EBD	2	blue
ENSBTAG00000034287	TULP1	2	blue
ENSBTAG00000038260	AKR1E2	2	blue
ENSBTAG00000038495	DCLK1	2	blue
ENSBTAG00000038904	PRRT1	2	blue
ENSBTAG00000039012	MFSD6L	2	blue
ENSBTAG00000039581	HOXD4	2	blue
ENSBTAG00000040061	ZBTB38	2	blue
ENSBTAG00000040086	SLC38A8	2	blue
ENSBTAG00000045565	NHSL2	2	blue
ENSBTAG00000045652	PYY2	2	blue
ENSBTAG00000045824	SOX9	2	blue
ENSBTAG00000047658	PHF7	2	blue
ENSBTAG00000047997	PRPS2	2	blue
ENSBTAG00000048071	EXOSC2	2	blue
ENSBTAG00000048486	IQANK1	2	blue
ENSBTAG00000048504	PRR33	2	blue
ENSBTAG00000048804	CUPIN1	2	blue
ENSBTAG00000049306	MSRB1	2	blue
ENSBTAG00000049731	ZKSCAN5	2	blue
ENSBTAG00000050035	ZNF226	2	blue
ENSBTAG00000051982	MXRA7	2	blue
ENSBTAG00000052072	B3GNTL1	2	blue
ENSBTAG00000053023	LRRC74B	2	blue
ENSBTAG00000053310	C1QTNF9	2	blue
ENSBTAG00000053355	EFCAB10	2	blue
ENSBTAG00000054849	LRRC78	2	blue
ENSBTAG00000055098	LOC100299277	2	blue
ENSBTAG00000000079	CCSAP	3	brown
ENSBTAG00000000124	DHH	3	brown
ENSBTAG00000000321	TBL2	3	brown
ENSBTAG00000000345	CLDN15	3	brown
ENSBTAG00000000470	IBSP	3	brown
ENSBTAG00000000640	SELENOS	3	brown
ENSBTAG00000000815	EPHA2	3	brown
ENSBTAG00000000925	GLT8D2	3	brown
ENSBTAG00000001123	SNRNP48	3	brown
ENSBTAG00000001294	PPP1R15A	3	brown
ENSBTAG00000001382	SLC26A9	3	brown
ENSBTAG00000001398	ATP2A2	3	brown
ENSBTAG00000001435	ARL6IP6	3	brown
ENSBTAG00000001564	PDE4DIP	3	brown
ENSBTAG00000001945	ARG2	3	brown
ENSBTAG00000001950	RDH11	3	brown
ENSBTAG00000002719	ORC1	3	brown
ENSBTAG00000002804	PDGFRB	3	brown
ENSBTAG00000002846	TRAF3IP3	3	brown
ENSBTAG00000002951	CD244	3	brown
ENSBTAG00000003152	IFI27	3	brown
ENSBTAG00000003255	CD4	3	brown
ENSBTAG00000003297	OASL	3	brown
ENSBTAG00000003619	SEC24D	3	brown
ENSBTAG00000003650	NR4A2	3	brown
ENSBTAG00000003652	TMEM128	3	brown
ENSBTAG00000003938	FNDC1	3	brown
ENSBTAG00000003961	SNX20	3	brown
ENSBTAG00000004207	CD93	3	brown
ENSBTAG00000004273	CST7	3	brown
ENSBTAG00000004284	UFD1	3	brown
ENSBTAG00000004379	ETHE1	3	brown
ENSBTAG00000004426	DNAJB14	3	brown
ENSBTAG00000004782	PTPRCAP	3	brown
ENSBTAG00000004943	CCNA2	3	brown
ENSBTAG00000005163	S100A1	3	brown
ENSBTAG00000005304	SRM	3	brown
ENSBTAG00000005371	DPAGT1	3	brown
ENSBTAG00000006132	DENND3	3	brown
ENSBTAG00000006768	ENTPD4	3	brown
ENSBTAG00000006833	LMAN1	3	brown
ENSBTAG00000007520	MAPRE2	3	brown
ENSBTAG00000007562	TRAM1	3	brown
ENSBTAG00000007895	SLC20A1	3	brown
ENSBTAG00000008091	SELENBP1	3	brown
ENSBTAG00000008100	GOLGA7B	3	brown
ENSBTAG00000008291	PROCR	3	brown
ENSBTAG00000008406	TREX1	3	brown
ENSBTAG00000008437	PCDH12	3	brown
ENSBTAG00000008607	ARID3A	3	brown
ENSBTAG00000008840	HM13	3	brown
ENSBTAG00000008883	ZNF207	3	brown
ENSBTAG00000009486	TMEM179B	3	brown
ENSBTAG00000009812	CXCL5	3	brown
ENSBTAG00000009864	B4GALNT2	3	brown
ENSBTAG00000009933	DTX3L	3	brown
ENSBTAG00000010002	IRF2	3	brown
ENSBTAG00000010069	EGR1	3	brown
ENSBTAG00000010863	DCP1A	3	brown
ENSBTAG00000010987	NFKBIZ	3	brown
ENSBTAG00000011238	CD48	3	brown
ENSBTAG00000011316	ZC3H12A	3	brown
ENSBTAG00000012216	MLKL	3	brown
ENSBTAG00000012408	RAB27A	3	brown
ENSBTAG00000012671	TNIP1	3	brown
ENSBTAG00000012899	IFNGR2	3	brown
ENSBTAG00000013030	LRRC8A	3	brown
ENSBTAG00000013055	LOC786126	3	brown
ENSBTAG00000013368	ANKRD22	3	brown
ENSBTAG00000013472	COL1A2	3	brown
ENSBTAG00000013510	TOR2A	3	brown
ENSBTAG00000013537	FER1L6	3	brown
ENSBTAG00000013557	ERAP1	3	brown
ENSBTAG00000013670	SLC46A2	3	brown
ENSBTAG00000013702	ZNF296	3	brown
ENSBTAG00000013873	MSX2	3	brown
ENSBTAG00000014167	RNF121	3	brown
ENSBTAG00000014329	LOC512548	3	brown
ENSBTAG00000014396	KLF10	3	brown
ENSBTAG00000014693	TMEM88	3	brown
ENSBTAG00000015101	HMGB2	3	brown
ENSBTAG00000015195	NPC1	3	brown
ENSBTAG00000015337	TSPAN12	3	brown
ENSBTAG00000015375	SH2D3C	3	brown
ENSBTAG00000015457	FGFR1	3	brown
ENSBTAG00000015716	ERO1A	3	brown
ENSBTAG00000015969	STK40	3	brown
ENSBTAG00000016095	PRICKLE3	3	brown
ENSBTAG00000016131	NCAPG2	3	brown
ENSBTAG00000016477	PEAK3	3	brown
ENSBTAG00000016649	CCND2	3	brown
ENSBTAG00000016770	GAPT	3	brown
ENSBTAG00000016910	EEF1AKMT3	3	brown
ENSBTAG00000016968	CHST4	3	brown
ENSBTAG00000017009	CMC2	3	brown
ENSBTAG00000017009	LOC101905951	3	brown
ENSBTAG00000017179	USP12	3	brown
ENSBTAG00000017670	LOC511531	3	brown
ENSBTAG00000017674	SCNN1D	3	brown
ENSBTAG00000018105	ACVR2B	3	brown
ENSBTAG00000018287	SLC25A48	3	brown
ENSBTAG00000018295	SEC23B	3	brown
ENSBTAG00000018436	UBE2J1	3	brown
ENSBTAG00000018447	RABGGTB	3	brown
ENSBTAG00000018531	JCHAIN	3	brown
ENSBTAG00000019095	CCR10	3	brown
ENSBTAG00000019203	S100A4	3	brown
ENSBTAG00000019213	CNNM4	3	brown
ENSBTAG00000019371	CNR2	3	brown
ENSBTAG00000019390	CA12	3	brown
ENSBTAG00000019627	THY1	3	brown
ENSBTAG00000020196	ENPP3	3	brown
ENSBTAG00000020227	FAM72A	3	brown
ENSBTAG00000020297	SLC66A3	3	brown
ENSBTAG00000020330	BTG1	3	brown
ENSBTAG00000020332	OSBP	3	brown
ENSBTAG00000020515	FHIP1B	3	brown
ENSBTAG00000020610	ANKZF1	3	brown
ENSBTAG00000021424	CSK	3	brown
ENSBTAG00000021435	MAFF	3	brown
ENSBTAG00000021462	CSF3	3	brown
ENSBTAG00000021512	ZBTB7B	3	brown
ENSBTAG00000021766	HBEGF	3	brown
ENSBTAG00000021958	GZMA	3	brown
ENSBTAG00000022564	AKR1C4	3	brown
ENSBTAG00000025221	TEX30	3	brown
ENSBTAG00000025775	INSL3	3	brown
ENSBTAG00000025848	RBM3	3	brown
ENSBTAG00000026779	LYZ	3	brown
ENSBTAG00000027916	MALT1	3	brown
ENSBTAG00000031497	FGFBP1	3	brown
ENSBTAG00000032122	CD19	3	brown
ENSBTAG00000032534	RHOF	3	brown
ENSBTAG00000033255	DUSP11	3	brown
ENSBTAG00000033702	STARD8	3	brown
ENSBTAG00000034501	CFI	3	brown
ENSBTAG00000037778	CXCL3	3	brown
ENSBTAG00000037832	ASPHD2	3	brown
ENSBTAG00000038215	CLCA2	3	brown
ENSBTAG00000038375	STOM	3	brown
ENSBTAG00000039509	GPRC5A	3	brown
ENSBTAG00000039861	OAS1Y	3	brown
ENSBTAG00000040161	TM4SF19	3	brown
ENSBTAG00000046152	MGAM	3	brown
ENSBTAG00000046273	TLCD3A	3	brown
ENSBTAG00000046588	DNAJB9	3	brown
ENSBTAG00000046924	SEMA3G	3	brown
ENSBTAG00000047107	TNIP3	3	brown
ENSBTAG00000047448	C25H16orf54	3	brown
ENSBTAG00000048122	CFD	3	brown
ENSBTAG00000048171	TAP	3	brown
ENSBTAG00000049108	TRAT1	3	brown
ENSBTAG00000050061	INCENP	3	brown
ENSBTAG00000052388	HYAL3	3	brown
ENSBTAG00000052579	LOC789175	3	brown
ENSBTAG00000053889	LAP	3	brown
ENSBTAG00000054259	LOC618071	3	brown
ENSBTAG00000055302	LOC100140873	3	brown
ENSBTAG00000000524	CSTB	5	green
ENSBTAG00000000986	USH1C	5	green
ENSBTAG00000001009	HCLS1	5	green
ENSBTAG00000001193	UNC93B1	5	green
ENSBTAG00000001197	SLAMF7	5	green
ENSBTAG00000001420	ABHD12	5	green
ENSBTAG00000001844	MOGS	5	green
ENSBTAG00000002096	FCGR3A	5	green
ENSBTAG00000002326	LGALS3	5	green
ENSBTAG00000003291	RIMKLB	5	green
ENSBTAG00000003341	DOK2	5	green
ENSBTAG00000004767	SYK	5	green
ENSBTAG00000004826	ACP5	5	green
ENSBTAG00000004895	AFAP1L2	5	green
ENSBTAG00000005021	SEMA5A	5	green
ENSBTAG00000005215	IL10RA	5	green
ENSBTAG00000005404	MSC	5	green
ENSBTAG00000006001	STAP2	5	green
ENSBTAG00000006082	DNASE2	5	green
ENSBTAG00000006241	MAN2B1	5	green
ENSBTAG00000006515	ESPN	5	green
ENSBTAG00000006549	CALHM6	5	green
ENSBTAG00000006934	CYP11A1	5	green
ENSBTAG00000007153	C1QA	5	green
ENSBTAG00000007440	MLANA	5	green
ENSBTAG00000007531	NCF4	5	green
ENSBTAG00000007622	CTSD	5	green
ENSBTAG00000007964	ARPC4	5	green
ENSBTAG00000008057	PARVG	5	green
ENSBTAG00000008223	NLRC4	5	green
ENSBTAG00000008603	TASL	5	green
ENSBTAG00000008735	VASH1	5	green
ENSBTAG00000008779	ALOX15B	5	green
ENSBTAG00000009080	ITGB6	5	green
ENSBTAG00000009677	PARP10	5	green
ENSBTAG00000010402	MYH9	5	green
ENSBTAG00000010458	LOC613822	5	green
ENSBTAG00000010632	FABP6	5	green
ENSBTAG00000011375	SHC3	5	green
ENSBTAG00000011437	SIK1	5	green
ENSBTAG00000011545	GDA	5	green
ENSBTAG00000011639	STK11	5	green
ENSBTAG00000011765	GABARAPL1	5	green
ENSBTAG00000012117	ATP6AP1	5	green
ENSBTAG00000012387	PAM	5	green
ENSBTAG00000012451	BOLA-DMB	5	green
ENSBTAG00000012829	EBI3	5	green
ENSBTAG00000013282	NECAP2	5	green
ENSBTAG00000014090	ARID5A	5	green
ENSBTAG00000014199	TBX21	5	green
ENSBTAG00000014707	ISG15	5	green
ENSBTAG00000014841	GBA1	5	green
ENSBTAG00000015032	CD14	5	green
ENSBTAG00000015160	PLD4	5	green
ENSBTAG00000015810	C15H11orf34	5	green
ENSBTAG00000015815	CFP	5	green
ENSBTAG00000016021	GAA	5	green
ENSBTAG00000016103	CBFB	5	green
ENSBTAG00000016168	APLP2	5	green
ENSBTAG00000017287	DRAM1	5	green
ENSBTAG00000017318	TMEM178A	5	green
ENSBTAG00000017465	GNS	5	green
ENSBTAG00000017746	SLIT3	5	green
ENSBTAG00000017971	LRFN2	5	green
ENSBTAG00000018040	PSMB10	5	green
ENSBTAG00000018130	MAP2	5	green
ENSBTAG00000018207	M6PR	5	green
ENSBTAG00000018245	SLC1A3	5	green
ENSBTAG00000018246	RAB39A	5	green
ENSBTAG00000018316	ZMYND15	5	green
ENSBTAG00000018349	IFI30	5	green
ENSBTAG00000018473	MARCO	5	green
ENSBTAG00000018823	GRN	5	green
ENSBTAG00000019428	CCR1	5	green
ENSBTAG00000019441	MED28	5	green
ENSBTAG00000019953	CYBB	5	green
ENSBTAG00000020394	TNFAIP8L2	5	green
ENSBTAG00000020456	AGPAT3	5	green
ENSBTAG00000020535	PYCARD	5	green
ENSBTAG00000020554	AIF1	5	green
ENSBTAG00000020747	ASS1	5	green
ENSBTAG00000021250	RALBP1	5	green
ENSBTAG00000021499	PSAP	5	green
ENSBTAG00000023283	JAML	5	green
ENSBTAG00000024503	FCER1G	5	green
ENSBTAG00000024803	ENDOD1	5	green
ENSBTAG00000025398	LOC504548	5	green
ENSBTAG00000027924	SNX18	5	green
ENSBTAG00000030170	JPT1	5	green
ENSBTAG00000031444	LY86	5	green
ENSBTAG00000032277	KYNU	5	green
ENSBTAG00000032518	SPRED1	5	green
ENSBTAG00000034776	DDAH1	5	green
ENSBTAG00000035323	TMX4	5	green
ENSBTAG00000035958	RHOBTB2	5	green
ENSBTAG00000037856	MGC152281	5	green
ENSBTAG00000037907	DSEL	5	green
ENSBTAG00000038981	LOC518134	5	green
ENSBTAG00000045862	FERMT3	5	green
ENSBTAG00000047330	FABP5	5	green
ENSBTAG00000047531	ARHGAP4	5	green
ENSBTAG00000047827	RENBP	5	green
ENSBTAG00000048054	UAP1L1	5	green
ENSBTAG00000050852	CXCL9	5	green
ENSBTAG00000052822	C3H1orf162	5	green
ENSBTAG00000054194	SH2D1B	5	green
ENSBTAG00000000005	GRK3	0	grey
ENSBTAG00000000641	SKAP1	0	grey
ENSBTAG00000000718	TMPRSS9	0	grey
ENSBTAG00000000783	TGFA	0	grey
ENSBTAG00000000821	GPR137C	0	grey
ENSBTAG00000000892	CGAS	0	grey
ENSBTAG00000001135	CFAP276	0	grey
ENSBTAG00000001142	GNE	0	grey
ENSBTAG00000001153	TLE2	0	grey
ENSBTAG00000001161	SINHCAF	0	grey
ENSBTAG00000001166	HSF5	0	grey
ENSBTAG00000001204	JCAD	0	grey
ENSBTAG00000001223	CAAP1	0	grey
ENSBTAG00000001243	AP3M2	0	grey
ENSBTAG00000001333	PPARG	0	grey
ENSBTAG00000001364	DPH6	0	grey
ENSBTAG00000001401	SLC45A1	0	grey
ENSBTAG00000001500	FIGNL1	0	grey
ENSBTAG00000001512	ZFP64	0	grey
ENSBTAG00000001522	MTERF3	0	grey
ENSBTAG00000001539	SAV1	0	grey
ENSBTAG00000001558	PATL2	0	grey
ENSBTAG00000001571	LRRD1	0	grey
ENSBTAG00000001574	GPATCH2	0	grey
ENSBTAG00000001580	CLGN	0	grey
ENSBTAG00000001745	LUM	0	grey
ENSBTAG00000001796	CATSPERD	0	grey
ENSBTAG00000001806	IQCD	0	grey
ENSBTAG00000001815	ARHGEF5	0	grey
ENSBTAG00000001818	MEF2B	0	grey
ENSBTAG00000001882	CD79A	0	grey
ENSBTAG00000001937	ANAPC11	0	grey
ENSBTAG00000002041	SASH3	0	grey
ENSBTAG00000002092	PI16	0	grey
ENSBTAG00000002097	TMC5	0	grey
ENSBTAG00000002123	MYO3A	0	grey
ENSBTAG00000002164	AXDND1	0	grey
ENSBTAG00000002319	HMCN2	0	grey
ENSBTAG00000002401	NPFF	0	grey
ENSBTAG00000002490	CHPT1	0	grey
ENSBTAG00000002563	WDR45	0	grey
ENSBTAG00000002574	MYOZ2	0	grey
ENSBTAG00000002594	ZNF436	0	grey
ENSBTAG00000002595	ABCB5	0	grey
ENSBTAG00000002661	ISLR2	0	grey
ENSBTAG00000002750	KRIT1	0	grey
ENSBTAG00000002751	VSTM5	0	grey
ENSBTAG00000002922	GAB2	0	grey
ENSBTAG00000002929	IRF4	0	grey
ENSBTAG00000002981	PIMREG	0	grey
ENSBTAG00000002985	KCNMB1	0	grey
ENSBTAG00000002988	MACO1	0	grey
ENSBTAG00000003137	PLPPR1	0	grey
ENSBTAG00000003161	YBEY	0	grey
ENSBTAG00000003180	TMEM201	0	grey
ENSBTAG00000003325	SNRK	0	grey
ENSBTAG00000003349	JAKMIP2	0	grey
ENSBTAG00000003403	PADI2	0	grey
ENSBTAG00000003410	EFL1	0	grey
ENSBTAG00000003415	ESD	0	grey
ENSBTAG00000003425	MGME1	0	grey
ENSBTAG00000003435	ENTREP2	0	grey
ENSBTAG00000003454	RGS20	0	grey
ENSBTAG00000003505	DCN	0	grey
ENSBTAG00000003511	SLAIN1	0	grey
ENSBTAG00000003531	ABCA13	0	grey
ENSBTAG00000003539	ROPN1L	0	grey
ENSBTAG00000003607	FAM20C	0	grey
ENSBTAG00000003692	UCP2	0	grey
ENSBTAG00000003764	AKIRIN2	0	grey
ENSBTAG00000003809	PLCD4	0	grey
ENSBTAG00000003983	TOM1L2	0	grey
ENSBTAG00000004022	PLAG1	0	grey
ENSBTAG00000004094	SPARCL1	0	grey
ENSBTAG00000004136	NFE2L3	0	grey
ENSBTAG00000004168	STON1	0	grey
ENSBTAG00000004175	HPD	0	grey
ENSBTAG00000004223	SRR	0	grey
ENSBTAG00000004231	GPM6A	0	grey
ENSBTAG00000004296	MORN5	0	grey
ENSBTAG00000004343	CCS	0	grey
ENSBTAG00000004364	THNSL2	0	grey
ENSBTAG00000004490	TRIM31	0	grey
ENSBTAG00000004494	B4GALNT1	0	grey
ENSBTAG00000004541	LPAR5	0	grey
ENSBTAG00000004591	PLPPR5	0	grey
ENSBTAG00000004637	MARCHF10	0	grey
ENSBTAG00000004745	NAA15	0	grey
ENSBTAG00000004751	SPTBN4	0	grey
ENSBTAG00000004790	UBE2T	0	grey
ENSBTAG00000004852	PLEKHO1	0	grey
ENSBTAG00000004945	BBS7	0	grey
ENSBTAG00000004982	GPLD1	0	grey
ENSBTAG00000005010	MXD3	0	grey
ENSBTAG00000005075	MRPL49	0	grey
ENSBTAG00000005168	CROCC2	0	grey
ENSBTAG00000005190	TSC1	0	grey
ENSBTAG00000005206	TMEM14A	0	grey
ENSBTAG00000005337	RAB3B	0	grey
ENSBTAG00000005379	SLC41A1	0	grey
ENSBTAG00000005400	ATG5	0	grey
ENSBTAG00000005638	CABYR	0	grey
ENSBTAG00000005712	STX18	0	grey
ENSBTAG00000005719	GJB4	0	grey
ENSBTAG00000005736	ADGRF3	0	grey
ENSBTAG00000005748	SOX17	0	grey
ENSBTAG00000005765	SYNGR1	0	grey
ENSBTAG00000005809	GPR89A	0	grey
ENSBTAG00000005913	PATL1	0	grey
ENSBTAG00000005932	FAM184B	0	grey
ENSBTAG00000005933	CTNNBIP1	0	grey
ENSBTAG00000005979	HELLS	0	grey
ENSBTAG00000006016	GTPBP2	0	grey
ENSBTAG00000006029	OGDH	0	grey
ENSBTAG00000006083	KLF1	0	grey
ENSBTAG00000006086	MMP28	0	grey
ENSBTAG00000006117	FLYWCH1	0	grey
ENSBTAG00000006121	SBK2	0	grey
ENSBTAG00000006199	DRAP1	0	grey
ENSBTAG00000006223	THEMIS2	0	grey
ENSBTAG00000006225	RPA2	0	grey
ENSBTAG00000006288	VSTM4	0	grey
ENSBTAG00000006371	RMND5B	0	grey
ENSBTAG00000006419	TNNT1	0	grey
ENSBTAG00000006504	TCHP	0	grey
ENSBTAG00000006560	VANGL2	0	grey
ENSBTAG00000006595	DNAAF8	0	grey
ENSBTAG00000006640	RB1	0	grey
ENSBTAG00000006675	PCSK6	0	grey
ENSBTAG00000006748	DMXL1	0	grey
ENSBTAG00000006752	PFKFB4	0	grey
ENSBTAG00000006851	LOC617565	0	grey
ENSBTAG00000006877	MMP16	0	grey
ENSBTAG00000006936	MRPS18B	0	grey
ENSBTAG00000006951	LMO2	0	grey
ENSBTAG00000006987	CERS3	0	grey
ENSBTAG00000007108	LGALS12	0	grey
ENSBTAG00000007146	CPVL	0	grey
ENSBTAG00000007233	WDR25	0	grey
ENSBTAG00000007300	FHL3	0	grey
ENSBTAG00000007302	SLC2A5	0	grey
ENSBTAG00000007366	HAUS8	0	grey
ENSBTAG00000007462	ASTE1	0	grey
ENSBTAG00000007773	VCAM1	0	grey
ENSBTAG00000007870	FKBP14	0	grey
ENSBTAG00000007974	WTAP	0	grey
ENSBTAG00000007983	ZNF775	0	grey
ENSBTAG00000008053	WDFY2	0	grey
ENSBTAG00000008115	TNFAIP1	0	grey
ENSBTAG00000008165	ITGA2B	0	grey
ENSBTAG00000008168	STARD6	0	grey
ENSBTAG00000008181	CHAF1A	0	grey
ENSBTAG00000008188	MOSMO	0	grey
ENSBTAG00000008280	HNF4G	0	grey
ENSBTAG00000008288	ANKRD26	0	grey
ENSBTAG00000008323	SNAP25	0	grey
ENSBTAG00000008329	CYTIP	0	grey
ENSBTAG00000008409	MYC	0	grey
ENSBTAG00000008428	UPP1	0	grey
ENSBTAG00000008433	PGAP2	0	grey
ENSBTAG00000008479	CXCL13	0	grey
ENSBTAG00000008544	SALL1	0	grey
ENSBTAG00000008578	LSM4	0	grey
ENSBTAG00000008652	STYXL2	0	grey
ENSBTAG00000008672	GABRD	0	grey
ENSBTAG00000008682	TLR3	0	grey
ENSBTAG00000008710	KCNH1	0	grey
ENSBTAG00000008734	PM20D1	0	grey
ENSBTAG00000008866	GANC	0	grey
ENSBTAG00000008895	BPGM	0	grey
ENSBTAG00000008934	ESPL1	0	grey
ENSBTAG00000008994	FPGS	0	grey
ENSBTAG00000009012	PTX3	0	grey
ENSBTAG00000009107	CBX8	0	grey
ENSBTAG00000009153	MLXIPL	0	grey
ENSBTAG00000009191	TUSC3	0	grey
ENSBTAG00000009198	ASB9	0	grey
ENSBTAG00000009372	TTC5	0	grey
ENSBTAG00000009401	MTRR	0	grey
ENSBTAG00000009430	MYRIP	0	grey
ENSBTAG00000009470	CLIC4	0	grey
ENSBTAG00000009513	TGFBI	0	grey
ENSBTAG00000009547	ZDHHC4	0	grey
ENSBTAG00000009637	SLC12A2	0	grey
ENSBTAG00000009650	OTOF	0	grey
ENSBTAG00000009654	LPAR1	0	grey
ENSBTAG00000009739	CSMD1	0	grey
ENSBTAG00000009744	FAM193A	0	grey
ENSBTAG00000009851	ROBO1	0	grey
ENSBTAG00000009905	NFYA	0	grey
ENSBTAG00000009916	NTAQ1	0	grey
ENSBTAG00000010015	NMRAL1	0	grey
ENSBTAG00000010027	CHDH	0	grey
ENSBTAG00000010062	SLC26A4	0	grey
ENSBTAG00000010100	MED20	0	grey
ENSBTAG00000010351	SNX25	0	grey
ENSBTAG00000010352	KCNK16	0	grey
ENSBTAG00000010457	NUAK1	0	grey
ENSBTAG00000010549	IFRD1	0	grey
ENSBTAG00000010609	FAM221A	0	grey
ENSBTAG00000010821	ACER2	0	grey
ENSBTAG00000010833	IL17RE	0	grey
ENSBTAG00000010874	GHSR	0	grey
ENSBTAG00000010923	RAB9A	0	grey
ENSBTAG00000010954	ART3	0	grey
ENSBTAG00000010963	IL16	0	grey
ENSBTAG00000011056	IDS	0	grey
ENSBTAG00000011081	KBTBD8	0	grey
ENSBTAG00000011256	MYO1B	0	grey
ENSBTAG00000011381	SLC30A3	0	grey
ENSBTAG00000011382	NHERF1	0	grey
ENSBTAG00000011420	CA9	0	grey
ENSBTAG00000011481	IL12RB1	0	grey
ENSBTAG00000011495	DIP2A	0	grey
ENSBTAG00000011515	SELL	0	grey
ENSBTAG00000011516	LRP12	0	grey
ENSBTAG00000011551	CPNE9	0	grey
ENSBTAG00000011614	PDE7A	0	grey
ENSBTAG00000011660	MSMB	0	grey
ENSBTAG00000011692	BMERB1	0	grey
ENSBTAG00000011793	FDX1	0	grey
ENSBTAG00000011795	TXNRD3	0	grey
ENSBTAG00000011820	DAPK2	0	grey
ENSBTAG00000011822	ARMH1	0	grey
ENSBTAG00000011889	NOC4L	0	grey
ENSBTAG00000011941	LYZ1	0	grey
ENSBTAG00000011966	LAMC1	0	grey
ENSBTAG00000011975	SERPINB1	0	grey
ENSBTAG00000012016	LMTK3	0	grey
ENSBTAG00000012200	ANKRD13D	0	grey
ENSBTAG00000012212	CYP26B1	0	grey
ENSBTAG00000012219	CSPG4	0	grey
ENSBTAG00000012275	ENDOU	0	grey
ENSBTAG00000012397	DCK	0	grey
ENSBTAG00000012688	CAPSL	0	grey
ENSBTAG00000012759	FBXO41	0	grey
ENSBTAG00000012870	BMP5	0	grey
ENSBTAG00000012890	SLC25A3	0	grey
ENSBTAG00000012918	CRISP3	0	grey
ENSBTAG00000012920	TMEM70	0	grey
ENSBTAG00000012922	PHF2	0	grey
ENSBTAG00000012926	TM6SF1	0	grey
ENSBTAG00000012972	CYP2U1	0	grey
ENSBTAG00000012976	WLS	0	grey
ENSBTAG00000013011	PLAA	0	grey
ENSBTAG00000013023	MAP4K4	0	grey
ENSBTAG00000013047	GRM7	0	grey
ENSBTAG00000013081	PSPH	0	grey
ENSBTAG00000013173	SEPTIN3	0	grey
ENSBTAG00000013225	NBN	0	grey
ENSBTAG00000013242	MYMK	0	grey
ENSBTAG00000013274	CENPV	0	grey
ENSBTAG00000013279	FOXP3	0	grey
ENSBTAG00000013301	GGT7	0	grey
ENSBTAG00000013550	PRKCG	0	grey
ENSBTAG00000013611	SCLT1	0	grey
ENSBTAG00000013678	OSGIN2	0	grey
ENSBTAG00000013790	MAP3K1	0	grey
ENSBTAG00000013802	DAB1	0	grey
ENSBTAG00000013858	HAPSTR1	0	grey
ENSBTAG00000014028	PSTK	0	grey
ENSBTAG00000014038	CDKL2	0	grey
ENSBTAG00000014081	NBAS	0	grey
ENSBTAG00000014103	SH3GL2	0	grey
ENSBTAG00000014124	MLLT3	0	grey
ENSBTAG00000014171	NAPEPLD	0	grey
ENSBTAG00000014172	FGD2	0	grey
ENSBTAG00000014179	SLC12A5	0	grey
ENSBTAG00000014326	CDCA8	0	grey
ENSBTAG00000014365	LOC112447333	0	grey
ENSBTAG00000014496	CCR6	0	grey
ENSBTAG00000014546	CLEC7A	0	grey
ENSBTAG00000014550	GLT8D1	0	grey
ENSBTAG00000014599	LRRC66	0	grey
ENSBTAG00000014645	CNTN2	0	grey
ENSBTAG00000014727	RFC4	0	grey
ENSBTAG00000014803	CPZ	0	grey
ENSBTAG00000014823	TXNDC11	0	grey
ENSBTAG00000014886	MEX3C	0	grey
ENSBTAG00000014923	BBS2	0	grey
ENSBTAG00000014960	SCHIP1	0	grey
ENSBTAG00000015049	ECSIT	0	grey
ENSBTAG00000015087	KLHL35	0	grey
ENSBTAG00000015209	MXD4	0	grey
ENSBTAG00000015280	KIF2C	0	grey
ENSBTAG00000015291	ORC4	0	grey
ENSBTAG00000015314	ASL	0	grey
ENSBTAG00000015336	PRUNE1	0	grey
ENSBTAG00000015362	BMP7	0	grey
ENSBTAG00000015408	DTYMK	0	grey
ENSBTAG00000015441	ACTG2	0	grey
ENSBTAG00000015591	SQSTM1	0	grey
ENSBTAG00000015599	PRKD2	0	grey
ENSBTAG00000015602	MRNIP	0	grey
ENSBTAG00000015670	PAK3	0	grey
ENSBTAG00000015780	RCN2	0	grey
ENSBTAG00000015836	EXOC3L2	0	grey
ENSBTAG00000015976	PHF12	0	grey
ENSBTAG00000016042	TM6SF2	0	grey
ENSBTAG00000016080	VPS13D	0	grey
ENSBTAG00000016109	DHRS12	0	grey
ENSBTAG00000016140	PPFIBP2	0	grey
ENSBTAG00000016206	MAOA	0	grey
ENSBTAG00000016208	TGM2	0	grey
ENSBTAG00000016244	VWA3A	0	grey
ENSBTAG00000016247	TACR3	0	grey
ENSBTAG00000016287	UNK	0	grey
ENSBTAG00000016505	TMC7	0	grey
ENSBTAG00000016523	DNAH10	0	grey
ENSBTAG00000016529	SLC25A30	0	grey
ENSBTAG00000016548	TEX12	0	grey
ENSBTAG00000016564	NPRL3	0	grey
ENSBTAG00000016640	HEATR3	0	grey
ENSBTAG00000016667	ZBTB46	0	grey
ENSBTAG00000016704	SLC37A2	0	grey
ENSBTAG00000016743	DNTTIP1	0	grey
ENSBTAG00000016752	ASB10	0	grey
ENSBTAG00000016800	SEMA6D	0	grey
ENSBTAG00000016801	RXRG	0	grey
ENSBTAG00000016895	NIPA2	0	grey
ENSBTAG00000016951	WDFY1	0	grey
ENSBTAG00000016987	WDCP	0	grey
ENSBTAG00000017069	GASK1B	0	grey
ENSBTAG00000017184	ZBTB33	0	grey
ENSBTAG00000017189	POLE4	0	grey
ENSBTAG00000017211	SERINC4	0	grey
ENSBTAG00000017357	CLCA4	0	grey
ENSBTAG00000017391	HS3ST2	0	grey
ENSBTAG00000017462	ATF4	0	grey
ENSBTAG00000017542	PPARD	0	grey
ENSBTAG00000017567	ACACA	0	grey
ENSBTAG00000017741	HACD4	0	grey
ENSBTAG00000017755	EWSR1	0	grey
ENSBTAG00000017877	NECTIN4	0	grey
ENSBTAG00000017890	ZMAT5	0	grey
ENSBTAG00000017970	ZYX	0	grey
ENSBTAG00000018052	PTPRS	0	grey
ENSBTAG00000018057	ZNF621	0	grey
ENSBTAG00000018064	FAM221A	0	grey
ENSBTAG00000018084	CASTOR1	0	grey
ENSBTAG00000018086	TBC1D10A	0	grey
ENSBTAG00000018152	MYADM	0	grey
ENSBTAG00000018165	RIPOR2	0	grey
ENSBTAG00000018244	VSTM2B	0	grey
ENSBTAG00000018257	APIP	0	grey
ENSBTAG00000018373	DPYSL2	0	grey
ENSBTAG00000018382	SMS	0	grey
ENSBTAG00000018395	KIAA1217	0	grey
ENSBTAG00000018446	GCA	0	grey
ENSBTAG00000018465	KCNAB1	0	grey
ENSBTAG00000018502	ARMC9	0	grey
ENSBTAG00000018519	GAS2L2	0	grey
ENSBTAG00000018543	VIL1	0	grey
ENSBTAG00000018807	MYBPHL	0	grey
ENSBTAG00000018926	LEAP2	0	grey
ENSBTAG00000019044	BAIAP2	0	grey
ENSBTAG00000019049	AATK	0	grey
ENSBTAG00000019060	CLDN11	0	grey
ENSBTAG00000019116	MOB4	0	grey
ENSBTAG00000019153	JMJD6	0	grey
ENSBTAG00000019164	RHOBTB1	0	grey
ENSBTAG00000019246	SC5D	0	grey
ENSBTAG00000019249	HS3ST6	0	grey
ENSBTAG00000019255	NFE2L2	0	grey
ENSBTAG00000019279	MLH3	0	grey
ENSBTAG00000019385	SCN3A	0	grey
ENSBTAG00000019403	MALSU1	0	grey
ENSBTAG00000019437	SLFN11	0	grey
ENSBTAG00000019446	ELP5	0	grey
ENSBTAG00000019497	ILDR2	0	grey
ENSBTAG00000019498	ITGA3	0	grey
ENSBTAG00000019529	ATP8A2	0	grey
ENSBTAG00000019534	TRNT1	0	grey
ENSBTAG00000019550	TBC1D2	0	grey
ENSBTAG00000019734	CD276	0	grey
ENSBTAG00000019757	SUDS3	0	grey
ENSBTAG00000019793	RGS22	0	grey
ENSBTAG00000019818	CASZ1	0	grey
ENSBTAG00000019889	DIS3	0	grey
ENSBTAG00000019895	PIBF1	0	grey
ENSBTAG00000019907	WNK4	0	grey
ENSBTAG00000019980	DGKI	0	grey
ENSBTAG00000020010	SPATA1	0	grey
ENSBTAG00000020100	ARHGAP11A	0	grey
ENSBTAG00000020169	CEPT1	0	grey
ENSBTAG00000020225	TBXAS1	0	grey
ENSBTAG00000020243	SVEP1	0	grey
ENSBTAG00000020252	NLGN2	0	grey
ENSBTAG00000020303	FBXO38	0	grey
ENSBTAG00000020450	CLDND2	0	grey
ENSBTAG00000020510	EPHA10	0	grey
ENSBTAG00000020514	FAM169B	0	grey
ENSBTAG00000020583	AASDH	0	grey
ENSBTAG00000020597	FMO3	0	grey
ENSBTAG00000020614	PRKCE	0	grey
ENSBTAG00000020699	TSPAN11	0	grey
ENSBTAG00000020848	PIK3CG	0	grey
ENSBTAG00000020859	SERPINF2	0	grey
ENSBTAG00000020890	TRIM66	0	grey
ENSBTAG00000020929	ARMC3	0	grey
ENSBTAG00000020964	STRIP1	0	grey
ENSBTAG00000020999	DDB2	0	grey
ENSBTAG00000021003	GALR1	0	grey
ENSBTAG00000021102	GALM	0	grey
ENSBTAG00000021116	EXOC6	0	grey
ENSBTAG00000021204	TES	0	grey
ENSBTAG00000021219	SEPTIN1	0	grey
ENSBTAG00000021223	CRY2	0	grey
ENSBTAG00000021292	LOC527335	0	grey
ENSBTAG00000021358	BLNK	0	grey
ENSBTAG00000021482	APH1A	0	grey
ENSBTAG00000021485	C3H1orf54	0	grey
ENSBTAG00000021554	NOL7	0	grey
ENSBTAG00000021581	FHOD3	0	grey
ENSBTAG00000021611	IFTAP	0	grey
ENSBTAG00000021632	MSRA	0	grey
ENSBTAG00000021671	METTL18	0	grey
ENSBTAG00000021692	TBR1	0	grey
ENSBTAG00000021751	RASEF	0	grey
ENSBTAG00000021795	HNF1A	0	grey
ENSBTAG00000021876	WDR72	0	grey
ENSBTAG00000021893	USP21	0	grey
ENSBTAG00000021918	EZH1	0	grey
ENSBTAG00000021959	CDC20B	0	grey
ENSBTAG00000021975	PATJ	0	grey
ENSBTAG00000022294	FADS1	0	grey
ENSBTAG00000022530	TMEM186	0	grey
ENSBTAG00000022588	C14H8orf34	0	grey
ENSBTAG00000022779	OLFM4	0	grey
ENSBTAG00000022920	RNF128	0	grey
ENSBTAG00000023007	LOC531152	0	grey
ENSBTAG00000023375	METTL6	0	grey
ENSBTAG00000024157	DYNC2I1	0	grey
ENSBTAG00000024195	LDLRAD1	0	grey
ENSBTAG00000024633	PIK3C2B	0	grey
ENSBTAG00000024980	VIT	0	grey
ENSBTAG00000025258	LOC515676	0	grey
ENSBTAG00000025410	EGFL8	0	grey
ENSBTAG00000025458	DPF3	0	grey
ENSBTAG00000025893	CDH12	0	grey
ENSBTAG00000025942	HPGD	0	grey
ENSBTAG00000026070	LOC107131273	0	grey
ENSBTAG00000026172	LRATD2	0	grey
ENSBTAG00000026194	AMZ1	0	grey
ENSBTAG00000026415	MRPS34	0	grey
ENSBTAG00000026429	DECR2	0	grey
ENSBTAG00000026657	IFT27	0	grey
ENSBTAG00000026758	LOC788425	0	grey
ENSBTAG00000026842	ZRANB3	0	grey
ENSBTAG00000026919	PXDC1	0	grey
ENSBTAG00000026966	RASSF9	0	grey
ENSBTAG00000026993	TMBIM4	0	grey
ENSBTAG00000027197	KIF6	0	grey
ENSBTAG00000027312	ECT2L	0	grey
ENSBTAG00000027317	RNF114	0	grey
ENSBTAG00000030296	LCNL1	0	grey
ENSBTAG00000030520	PROB1	0	grey
ENSBTAG00000030584	SLC35A4	0	grey
ENSBTAG00000030584	LOC112447523	0	grey
ENSBTAG00000030817	LMBR1	0	grey
ENSBTAG00000030836	ZBTB21	0	grey
ENSBTAG00000030939	ZNF575	0	grey
ENSBTAG00000030951	ZNF655	0	grey
ENSBTAG00000031295	HSDL2	0	grey
ENSBTAG00000031347	SPDYA	0	grey
ENSBTAG00000031548	LOC514257	0	grey
ENSBTAG00000031564	GNL3L	0	grey
ENSBTAG00000031834	LOC514011	0	grey
ENSBTAG00000031874	ZNF165	0	grey
ENSBTAG00000031875	BANF1	0	grey
ENSBTAG00000031933	ALOX12E	0	grey
ENSBTAG00000032059	TGM5	0	grey
ENSBTAG00000032079	SYT9	0	grey
ENSBTAG00000032591	CTHRC1	0	grey
ENSBTAG00000032650	DPY19L2	0	grey
ENSBTAG00000032872	THOC7	0	grey
ENSBTAG00000033140	LRRC3B	0	grey
ENSBTAG00000033170	LRRC58	0	grey
ENSBTAG00000033331	CHMP1A	0	grey
ENSBTAG00000033386	TEX26	0	grey
ENSBTAG00000033748	IL18RAP	0	grey
ENSBTAG00000034106	CYP8B1	0	grey
ENSBTAG00000034206	EMCN	0	grey
ENSBTAG00000034498	LY6D	0	grey
ENSBTAG00000034978	FAM168B	0	grey
ENSBTAG00000035144	PLCXD1	0	grey
ENSBTAG00000035615	UPF3B	0	grey
ENSBTAG00000036099	LOC104968656	0	grey
ENSBTAG00000037799	LOC515697	0	grey
ENSBTAG00000038063	LIPJ	0	grey
ENSBTAG00000038154	HSH2D	0	grey
ENSBTAG00000038178	ZNF25	0	grey
ENSBTAG00000038234	BHMT2	0	grey
ENSBTAG00000038415	SLC6A12	0	grey
ENSBTAG00000038512	LIPI	0	grey
ENSBTAG00000038532	FOLR3	0	grey
ENSBTAG00000038888	ZBTB9	0	grey
ENSBTAG00000038938	LOC781710	0	grey
ENSBTAG00000039133	C22H3orf49	0	grey
ENSBTAG00000039275	ERAP2	0	grey
ENSBTAG00000039337	LOC100295883	0	grey
ENSBTAG00000039618	ARL14EPL	0	grey
ENSBTAG00000039657	H2AC6	0	grey
ENSBTAG00000039855	SUMF1	0	grey
ENSBTAG00000040147	SYNDIG1	0	grey
ENSBTAG00000040394	PRSS27	0	grey
ENSBTAG00000040449	C15H11orf97	0	grey
ENSBTAG00000043553	GPX3	0	grey
ENSBTAG00000043950	LCA5	0	grey
ENSBTAG00000043975	MYCT1	0	grey
ENSBTAG00000044001	LPP	0	grey
ENSBTAG00000044082	MARCHF1	0	grey
ENSBTAG00000044083	LIMK1	0	grey
ENSBTAG00000045617	MTERF1	0	grey
ENSBTAG00000046257	GIMAP4	0	grey
ENSBTAG00000046406	R3HDM4	0	grey
ENSBTAG00000046493	PDCD6	0	grey
ENSBTAG00000046977	PLA2G2D4	0	grey
ENSBTAG00000046977	PLA2G2D5	0	grey
ENSBTAG00000047061	NDOR1	0	grey
ENSBTAG00000047129	B3GNT6	0	grey
ENSBTAG00000047254	ABCA2	0	grey
ENSBTAG00000047268	WT1	0	grey
ENSBTAG00000047314	PPIE	0	grey
ENSBTAG00000047383	LOC784305	0	grey
ENSBTAG00000047605	LOC100337457	0	grey
ENSBTAG00000047902	ULBP21	0	grey
ENSBTAG00000047942	DESI1	0	grey
ENSBTAG00000048034	GLTPD2	0	grey
ENSBTAG00000048086	TEX13B	0	grey
ENSBTAG00000048125	ENTPD2	0	grey
ENSBTAG00000048286	E2F6	0	grey
ENSBTAG00000049248	FCHSD1	0	grey
ENSBTAG00000049308	GAS2L3	0	grey
ENSBTAG00000049333	LOC112443175	0	grey
ENSBTAG00000049397	CAV2	0	grey
ENSBTAG00000049666	CYP3A28	0	grey
ENSBTAG00000050253	TRPM3	0	grey
ENSBTAG00000050814	CFAP70	0	grey
ENSBTAG00000051435	ZFP30	0	grey
ENSBTAG00000051956	GUCA1A	0	grey
ENSBTAG00000052073	SPATA17	0	grey
ENSBTAG00000052397	LOC100139916	0	grey
ENSBTAG00000052417	THAP2	0	grey
ENSBTAG00000052562	ID4	0	grey
ENSBTAG00000052794	SSLP1	0	grey
ENSBTAG00000052884	LOC531557	0	grey
ENSBTAG00000053050	SAMD9	0	grey
ENSBTAG00000054003	C18H19orf84	0	grey
ENSBTAG00000054085	SELENOP	0	grey
ENSBTAG00000054241	LOC100300896	0	grey
ENSBTAG00000054245	CD163L1	0	grey
ENSBTAG00000054437	ZNF75A	0	grey
ENSBTAG00000054594	LOC536097	0	grey
ENSBTAG00000054899	LOC112445029	0	grey
ENSBTAG00000054938	CAMTA1	0	grey
ENSBTAG00000055095	LOC534630	0	grey
ENSBTAG00000000941	PLEKHB2	9	magenta
ENSBTAG00000000985	RAB10	9	magenta
ENSBTAG00000002423	PSMD12	9	magenta
ENSBTAG00000003547	CSTF2	9	magenta
ENSBTAG00000005100	TMEM30A	9	magenta
ENSBTAG00000005633	ARHGEF28	9	magenta
ENSBTAG00000005833	ETNK1	9	magenta
ENSBTAG00000006614	TMCC1	9	magenta
ENSBTAG00000006654	TANK	9	magenta
ENSBTAG00000006672	SYNCRIP	9	magenta
ENSBTAG00000006776	KIAA0930	9	magenta
ENSBTAG00000007357	CHSY1	9	magenta
ENSBTAG00000008309	ATP13A2	9	magenta
ENSBTAG00000009761	ACTR2	9	magenta
ENSBTAG00000010134	OSTM1	9	magenta
ENSBTAG00000010207	NUDT21	9	magenta
ENSBTAG00000010227	CPSF2	9	magenta
ENSBTAG00000010971	LIMS1	9	magenta
ENSBTAG00000011197	IPMK	9	magenta
ENSBTAG00000012003	PPIA	9	magenta
ENSBTAG00000013357	PUM3	9	magenta
ENSBTAG00000015376	FBXW11	9	magenta
ENSBTAG00000015563	PDE12	9	magenta
ENSBTAG00000015771	YTHDF2	9	magenta
ENSBTAG00000019271	NARS1	9	magenta
ENSBTAG00000019986	CSNK1D	9	magenta
ENSBTAG00000020160	RNF138	9	magenta
ENSBTAG00000020309	G3BP1	9	magenta
ENSBTAG00000020996	CLDND1	9	magenta
ENSBTAG00000021580	HNRNPA3	9	magenta
ENSBTAG00000025929	MTAP	9	magenta
ENSBTAG00000027612	PPME1	9	magenta
ENSBTAG00000032964	C24H18orf25	9	magenta
ENSBTAG00000033041	YIPF4	9	magenta
ENSBTAG00000046956	STYX	9	magenta
ENSBTAG00000050888	DNAJC24	9	magenta
ENSBTAG00000001144	NAA20	8	pink
ENSBTAG00000001694	TYRO3	8	pink
ENSBTAG00000002848	C16H1orf74	8	pink
ENSBTAG00000004011	GALK2	8	pink
ENSBTAG00000004108	CENPX	8	pink
ENSBTAG00000004786	TMEM134	8	pink
ENSBTAG00000004942	EXOSC9	8	pink
ENSBTAG00000005441	ZMAT2	8	pink
ENSBTAG00000005814	PSME2	8	pink
ENSBTAG00000006033	NDUFA1	8	pink
ENSBTAG00000006244	WDR83OS	8	pink
ENSBTAG00000006391	NDUFAB1	8	pink
ENSBTAG00000006441	ATP5PB	8	pink
ENSBTAG00000007015	COX11	8	pink
ENSBTAG00000007900	FIS1	8	pink
ENSBTAG00000008075	TRAPPC4	8	pink
ENSBTAG00000008076	SLC35B2	8	pink
ENSBTAG00000008731	PRDX3	8	pink
ENSBTAG00000008977	TOMM6	8	pink
ENSBTAG00000010009	TMCO1	8	pink
ENSBTAG00000010191	PAK1	8	pink
ENSBTAG00000010437	MKLN1	8	pink
ENSBTAG00000010739	BLOC1S2	8	pink
ENSBTAG00000010867	LONP2	8	pink
ENSBTAG00000011732	PGAP3	8	pink
ENSBTAG00000011754	LAMTOR2	8	pink
ENSBTAG00000011893	HDHD2	8	pink
ENSBTAG00000012069	CCDC167	8	pink
ENSBTAG00000013065	HFE	8	pink
ENSBTAG00000013414	BLVRA	8	pink
ENSBTAG00000013477	GCHFR	8	pink
ENSBTAG00000015097	CACFD1	8	pink
ENSBTAG00000015806	OAZ2	8	pink
ENSBTAG00000016228	NMD3	8	pink
ENSBTAG00000016950	B3GAT3	8	pink
ENSBTAG00000017267	COX5A	8	pink
ENSBTAG00000017401	TBK1	8	pink
ENSBTAG00000019511	CDC123	8	pink
ENSBTAG00000019920	BICDL2	8	pink
ENSBTAG00000019984	GINS1	8	pink
ENSBTAG00000020429	MED29	8	pink
ENSBTAG00000020496	C23H6orf62	8	pink
ENSBTAG00000020837	ARHGEF16	8	pink
ENSBTAG00000021301	ACSF2	8	pink
ENSBTAG00000021802	MIEN1	8	pink
ENSBTAG00000021955	NPC2	8	pink
ENSBTAG00000024561	H3-3A	8	pink
ENSBTAG00000026266	MYL12B	8	pink
ENSBTAG00000027069	RAMAC	8	pink
ENSBTAG00000027795	GFM1	8	pink
ENSBTAG00000031752	TMEM256	8	pink
ENSBTAG00000032247	PPP1R11	8	pink
ENSBTAG00000032369	NMI	8	pink
ENSBTAG00000035247	MCEE	8	pink
ENSBTAG00000038186	GLRX	8	pink
ENSBTAG00000039555	COX7C	8	pink
ENSBTAG00000039555	LOC101902937	8	pink
ENSBTAG00000046385	RAB5A	8	pink
ENSBTAG00000049402	SUMO1	8	pink
ENSBTAG00000053386	RAB43	8	pink
ENSBTAG00000000067	SDF2L1	6	red
ENSBTAG00000000204	TMEM268	6	red
ENSBTAG00000000274	YKT6	6	red
ENSBTAG00000000495	HAVCR2	6	red
ENSBTAG00000000604	GPNMB	6	red
ENSBTAG00000001108	GMCL1	6	red
ENSBTAG00000001124	GALC	6	red
ENSBTAG00000001329	CLPTM1L	6	red
ENSBTAG00000001394	TMED9	6	red
ENSBTAG00000002746	OSTF1	6	red
ENSBTAG00000002823	MPZL1	6	red
ENSBTAG00000002993	SFT2D1	6	red
ENSBTAG00000003052	PCSK7	6	red
ENSBTAG00000003409	FKBP1B	6	red
ENSBTAG00000003516	TM2D2	6	red
ENSBTAG00000004215	RARRES2	6	red
ENSBTAG00000005026	MANEA	6	red
ENSBTAG00000005653	ABCB4	6	red
ENSBTAG00000005730	GPAT4	6	red
ENSBTAG00000005909	LEPROT	6	red
ENSBTAG00000006049	BZW1	6	red
ENSBTAG00000006166	WRNIP1	6	red
ENSBTAG00000006378	RIPK1	6	red
ENSBTAG00000006539	SIRPB2	6	red
ENSBTAG00000006792	EHD4	6	red
ENSBTAG00000006846	LGALS9	6	red
ENSBTAG00000006982	RAB5C	6	red
ENSBTAG00000007968	RPUSD3	6	red
ENSBTAG00000011121	CLCN4	6	red
ENSBTAG00000011129	QSOX2	6	red
ENSBTAG00000011206	GALNT1	6	red
ENSBTAG00000011823	CLSTN1	6	red
ENSBTAG00000012146	PPP1CA	6	red
ENSBTAG00000012350	MAT2B	6	red
ENSBTAG00000012642	TRADD	6	red
ENSBTAG00000012792	SRSF9	6	red
ENSBTAG00000013284	SGK3	6	red
ENSBTAG00000013315	ATP5F1B	6	red
ENSBTAG00000013496	CPM	6	red
ENSBTAG00000013631	GLUL	6	red
ENSBTAG00000013851	BCL10	6	red
ENSBTAG00000013900	TRIM21	6	red
ENSBTAG00000014095	HAUS7	6	red
ENSBTAG00000014318	SLC33A1	6	red
ENSBTAG00000014972	PTGER4	6	red
ENSBTAG00000015114	CALR	6	red
ENSBTAG00000015271	RIPK2	6	red
ENSBTAG00000015628	SMPD1	6	red
ENSBTAG00000015720	WWP1	6	red
ENSBTAG00000015958	GOSR2	6	red
ENSBTAG00000017354	MPP7	6	red
ENSBTAG00000017373	LACTB	6	red
ENSBTAG00000017605	AK2	6	red
ENSBTAG00000017652	NUP50	6	red
ENSBTAG00000017901	LAYN	6	red
ENSBTAG00000018116	MTFP1	6	red
ENSBTAG00000018889	ATP6V0B	6	red
ENSBTAG00000018915	FAM21A	6	red
ENSBTAG00000019369	TSPAN4	6	red
ENSBTAG00000019376	FNDC3B	6	red
ENSBTAG00000019443	CTDNEP1	6	red
ENSBTAG00000019939	SLC35D2	6	red
ENSBTAG00000020484	ADCK2	6	red
ENSBTAG00000020547	BCAP31	6	red
ENSBTAG00000021517	TMEM216	6	red
ENSBTAG00000021771	PTTG1IP	6	red
ENSBTAG00000022114	TMEM65	6	red
ENSBTAG00000025358	SNX2	6	red
ENSBTAG00000025612	URM1	6	red
ENSBTAG00000026369	ENC1	6	red
ENSBTAG00000030881	TMEM260	6	red
ENSBTAG00000031797	MANF	6	red
ENSBTAG00000035030	TMED7	6	red
ENSBTAG00000039153	RPS6KA4	6	red
ENSBTAG00000043971	NOTCH3	6	red
ENSBTAG00000046542	FAM174C	6	red
ENSBTAG00000046775	MAN1B1	6	red
ENSBTAG00000046797	NRAS	6	red
ENSBTAG00000049516	ARL6IP1	6	red
ENSBTAG00000051448	TMEM9	6	red
ENSBTAG00000051673	CRIP2	6	red
ENSBTAG00000000024	DYM	1	turquoise
ENSBTAG00000000053	FILIP1	1	turquoise
ENSBTAG00000000065	CRLS1	1	turquoise
ENSBTAG00000000333	ARHGAP20	1	turquoise
ENSBTAG00000000630	LSM14A	1	turquoise
ENSBTAG00000000804	MOB3B	1	turquoise
ENSBTAG00000000837	PARP1	1	turquoise
ENSBTAG00000001061	PRKCA	1	turquoise
ENSBTAG00000001094	MTUS2	1	turquoise
ENSBTAG00000001182	SEPTIN7	1	turquoise
ENSBTAG00000001387	WDR73	1	turquoise
ENSBTAG00000001425	FBXO11	1	turquoise
ENSBTAG00000001696	RBM46	1	turquoise
ENSBTAG00000002137	SUGT1	1	turquoise
ENSBTAG00000002402	IGF2R	1	turquoise
ENSBTAG00000002477	MRM2	1	turquoise
ENSBTAG00000002487	UBE3A	1	turquoise
ENSBTAG00000002531	ARHGAP10	1	turquoise
ENSBTAG00000002557	MRPL19	1	turquoise
ENSBTAG00000002645	SH3BP5L	1	turquoise
ENSBTAG00000002698	UBE3B	1	turquoise
ENSBTAG00000002706	GSTZ1	1	turquoise
ENSBTAG00000002730	ELP3	1	turquoise
ENSBTAG00000002858	ACBD7	1	turquoise
ENSBTAG00000002865	KCNIP1	1	turquoise
ENSBTAG00000002908	GNG4	1	turquoise
ENSBTAG00000002938	CPED1	1	turquoise
ENSBTAG00000002979	PIK3R3	1	turquoise
ENSBTAG00000003035	IMPACT	1	turquoise
ENSBTAG00000003075	DVL2	1	turquoise
ENSBTAG00000003339	ZBTB10	1	turquoise
ENSBTAG00000003472	ABCA12	1	turquoise
ENSBTAG00000003502	SPOCK1	1	turquoise
ENSBTAG00000003552	MED17	1	turquoise
ENSBTAG00000003699	ZFP3	1	turquoise
ENSBTAG00000003740	KDM6A	1	turquoise
ENSBTAG00000003788	RCC1	1	turquoise
ENSBTAG00000003934	PSPC1	1	turquoise
ENSBTAG00000003960	CCP110	1	turquoise
ENSBTAG00000004227	TBCK	1	turquoise
ENSBTAG00000004282	AMBRA1	1	turquoise
ENSBTAG00000004367	COQ10A	1	turquoise
ENSBTAG00000004448	CKAP5	1	turquoise
ENSBTAG00000004489	APPBP2	1	turquoise
ENSBTAG00000004607	GSG1L	1	turquoise
ENSBTAG00000004749	NEK4	1	turquoise
ENSBTAG00000004793	AMBN	1	turquoise
ENSBTAG00000004834	CNOT10	1	turquoise
ENSBTAG00000004965	NUP133	1	turquoise
ENSBTAG00000004992	TNPO3	1	turquoise
ENSBTAG00000005091	DGKG	1	turquoise
ENSBTAG00000005212	C1H3orf70	1	turquoise
ENSBTAG00000005410	RGS7	1	turquoise
ENSBTAG00000005835	PYCR2	1	turquoise
ENSBTAG00000005936	DMC1	1	turquoise
ENSBTAG00000005960	EPB41L2	1	turquoise
ENSBTAG00000006126	GTF3C1	1	turquoise
ENSBTAG00000006235	INTS3	1	turquoise
ENSBTAG00000006388	FBXO45	1	turquoise
ENSBTAG00000006528	BBS9	1	turquoise
ENSBTAG00000006927	ABCF1	1	turquoise
ENSBTAG00000006961	NLRP13	1	turquoise
ENSBTAG00000007133	CUL2	1	turquoise
ENSBTAG00000007210	RBFOX1	1	turquoise
ENSBTAG00000007245	IFT140	1	turquoise
ENSBTAG00000007308	EDC3	1	turquoise
ENSBTAG00000007371	SCAMP1	1	turquoise
ENSBTAG00000007438	STT3B	1	turquoise
ENSBTAG00000007586	SYNJ2BP	1	turquoise
ENSBTAG00000007963	KIDINS220	1	turquoise
ENSBTAG00000008022	PTGFRN	1	turquoise
ENSBTAG00000008167	TTC3	1	turquoise
ENSBTAG00000008525	LRIG2	1	turquoise
ENSBTAG00000008554	NINJ2	1	turquoise
ENSBTAG00000008619	SAMD8	1	turquoise
ENSBTAG00000008714	CLSTN2	1	turquoise
ENSBTAG00000009049	TMEM198B	1	turquoise
ENSBTAG00000009075	RNF207	1	turquoise
ENSBTAG00000009208	TCTN1	1	turquoise
ENSBTAG00000009426	EZH2	1	turquoise
ENSBTAG00000009438	EPHA5	1	turquoise
ENSBTAG00000009639	SMPD3	1	turquoise
ENSBTAG00000009657	MTMR1	1	turquoise
ENSBTAG00000009726	KLHL12	1	turquoise
ENSBTAG00000009798	DCDC2	1	turquoise
ENSBTAG00000009854	MPHOSPH10	1	turquoise
ENSBTAG00000009915	AP2A2	1	turquoise
ENSBTAG00000009988	SMARCB1	1	turquoise
ENSBTAG00000010032	NTM	1	turquoise
ENSBTAG00000010198	ATF7IP2	1	turquoise
ENSBTAG00000010379	CRTC1	1	turquoise
ENSBTAG00000010718	RALGPS2	1	turquoise
ENSBTAG00000010815	CAMKK2	1	turquoise
ENSBTAG00000010919	USP47	1	turquoise
ENSBTAG00000011252	RAD50	1	turquoise
ENSBTAG00000011435	NPEPPS	1	turquoise
ENSBTAG00000011471	CARS2	1	turquoise
ENSBTAG00000011649	FARSB	1	turquoise
ENSBTAG00000011930	DDX54	1	turquoise
ENSBTAG00000011964	DIS3L2	1	turquoise
ENSBTAG00000012048	CARM1	1	turquoise
ENSBTAG00000012059	MVD	1	turquoise
ENSBTAG00000012111	PRDM5	1	turquoise
ENSBTAG00000012234	RHBG	1	turquoise
ENSBTAG00000012448	CCDC91	1	turquoise
ENSBTAG00000012703	GLO1	1	turquoise
ENSBTAG00000012751	BTBD6	1	turquoise
ENSBTAG00000012801	UPP2	1	turquoise
ENSBTAG00000012966	SCRN3	1	turquoise
ENSBTAG00000013247	NLRP5	1	turquoise
ENSBTAG00000013339	NEBL	1	turquoise
ENSBTAG00000013408	RBM12B	1	turquoise
ENSBTAG00000013638	IQCH	1	turquoise
ENSBTAG00000013653	NFE2L1	1	turquoise
ENSBTAG00000013831	DSG1	1	turquoise
ENSBTAG00000013856	SSBP2	1	turquoise
ENSBTAG00000013991	NR2E1	1	turquoise
ENSBTAG00000014020	RTKN2	1	turquoise
ENSBTAG00000014053	MAK	1	turquoise
ENSBTAG00000014058	LDB2	1	turquoise
ENSBTAG00000014250	ZC3HAV1L	1	turquoise
ENSBTAG00000014324	ANTXR2	1	turquoise
ENSBTAG00000014389	SP4	1	turquoise
ENSBTAG00000014455	PDZD2	1	turquoise
ENSBTAG00000014601	SGCB	1	turquoise
ENSBTAG00000014677	TADA2A	1	turquoise
ENSBTAG00000014786	PBRM1	1	turquoise
ENSBTAG00000014947	PTPN13	1	turquoise
ENSBTAG00000015235	HMCN1	1	turquoise
ENSBTAG00000015309	CFAP300	1	turquoise
ENSBTAG00000015392	TTF2	1	turquoise
ENSBTAG00000015630	RLIM	1	turquoise
ENSBTAG00000015804	SIGMAR1	1	turquoise
ENSBTAG00000015805	SIPA1L1	1	turquoise
ENSBTAG00000015808	ZNF609	1	turquoise
ENSBTAG00000015957	IL4	1	turquoise
ENSBTAG00000016349	TEAD2	1	turquoise
ENSBTAG00000016496	ZNF641	1	turquoise
ENSBTAG00000016504	AGAP1	1	turquoise
ENSBTAG00000016515	EFNA5	1	turquoise
ENSBTAG00000016769	CDK16	1	turquoise
ENSBTAG00000016795	RUFY3	1	turquoise
ENSBTAG00000016820	BDA20	1	turquoise
ENSBTAG00000017094	SHMT1	1	turquoise
ENSBTAG00000017195	FANCC	1	turquoise
ENSBTAG00000017253	MECR	1	turquoise
ENSBTAG00000017452	RCAN3	1	turquoise
ENSBTAG00000017478	GSDMC	1	turquoise
ENSBTAG00000017551	DROSHA	1	turquoise
ENSBTAG00000017709	ATRNL1	1	turquoise
ENSBTAG00000017727	KIFAP3	1	turquoise
ENSBTAG00000017802	THRB	1	turquoise
ENSBTAG00000017950	SLC4A8	1	turquoise
ENSBTAG00000018199	ZBTB8A	1	turquoise
ENSBTAG00000018247	OCRL	1	turquoise
ENSBTAG00000018324	AGO3	1	turquoise
ENSBTAG00000018508	TMEM108	1	turquoise
ENSBTAG00000018509	ETNK2	1	turquoise
ENSBTAG00000018546	LRBA	1	turquoise
ENSBTAG00000018857	RAB4A	1	turquoise
ENSBTAG00000018954	ELP2	1	turquoise
ENSBTAG00000018978	KAT14	1	turquoise
ENSBTAG00000019158	MEX3A	1	turquoise
ENSBTAG00000019167	INPPL1	1	turquoise
ENSBTAG00000019748	TASOR	1	turquoise
ENSBTAG00000019845	USP30	1	turquoise
ENSBTAG00000019877	DOCK7	1	turquoise
ENSBTAG00000020074	NKPD1	1	turquoise
ENSBTAG00000020149	RNASEH2B	1	turquoise
ENSBTAG00000020379	AREL1	1	turquoise
ENSBTAG00000020421	SUPT16H	1	turquoise
ENSBTAG00000020474	NOXRED1	1	turquoise
ENSBTAG00000020750	AFF2	1	turquoise
ENSBTAG00000020826	CHIC1	1	turquoise
ENSBTAG00000020980	CAT	1	turquoise
ENSBTAG00000021072	DTNB	1	turquoise
ENSBTAG00000021190	CDH2	1	turquoise
ENSBTAG00000021583	TPGS2	1	turquoise
ENSBTAG00000021699	RORB	1	turquoise
ENSBTAG00000021844	COCH	1	turquoise
ENSBTAG00000021976	NDUFS1	1	turquoise
ENSBTAG00000022360	SOX5	1	turquoise
ENSBTAG00000023752	PABPN1L	1	turquoise
ENSBTAG00000023851	EEIG1	1	turquoise
ENSBTAG00000024255	UOX	1	turquoise
ENSBTAG00000024869	CX3CL1	1	turquoise
ENSBTAG00000024888	PDE5A	1	turquoise
ENSBTAG00000024932	FSCN2	1	turquoise
ENSBTAG00000025853	HOMER1	1	turquoise
ENSBTAG00000026246	MOSPD3	1	turquoise
ENSBTAG00000026307	ZNF629	1	turquoise
ENSBTAG00000026915	NEK1	1	turquoise
ENSBTAG00000027024	ARHGAP5	1	turquoise
ENSBTAG00000031890	DOCK1	1	turquoise
ENSBTAG00000032140	SBK1	1	turquoise
ENSBTAG00000032436	UBC	1	turquoise
ENSBTAG00000032657	TEAD1	1	turquoise
ENSBTAG00000033137	PSD3	1	turquoise
ENSBTAG00000034905	TMBIM7	1	turquoise
ENSBTAG00000034936	ANKIB1	1	turquoise
ENSBTAG00000037781	FKBPL	1	turquoise
ENSBTAG00000038117	ATG10	1	turquoise
ENSBTAG00000038224	GDF7	1	turquoise
ENSBTAG00000038659	KCTD8	1	turquoise
ENSBTAG00000038920	VPS13C	1	turquoise
ENSBTAG00000039340	SCN4B	1	turquoise
ENSBTAG00000039573	RABL6	1	turquoise
ENSBTAG00000039732	BLOC1S5	1	turquoise
ENSBTAG00000039766	FBRSL1	1	turquoise
ENSBTAG00000040106	CHADL	1	turquoise
ENSBTAG00000040336	ZNF268	1	turquoise
ENSBTAG00000043948	HCN1	1	turquoise
ENSBTAG00000043970	CFAP418	1	turquoise
ENSBTAG00000044046	SGCD	1	turquoise
ENSBTAG00000044061	FAXC	1	turquoise
ENSBTAG00000044119	KSR2	1	turquoise
ENSBTAG00000044169	PRELID2	1	turquoise
ENSBTAG00000044173	EHBP1	1	turquoise
ENSBTAG00000044179	CERS6	1	turquoise
ENSBTAG00000045633	AGTR1	1	turquoise
ENSBTAG00000046346	PACS2	1	turquoise
ENSBTAG00000046957	DOK6	1	turquoise
ENSBTAG00000047003	ASXL3	1	turquoise
ENSBTAG00000047416	HEPH	1	turquoise
ENSBTAG00000047608	MRPS22	1	turquoise
ENSBTAG00000047670	CHST8	1	turquoise
ENSBTAG00000048991	REC114	1	turquoise
ENSBTAG00000049722	TSACC	1	turquoise
ENSBTAG00000050535	ZNF385D	1	turquoise
ENSBTAG00000050705	FAM133B	1	turquoise
ENSBTAG00000051224	LOC516494	1	turquoise
ENSBTAG00000051295	FXYD4	1	turquoise
ENSBTAG00000051638	C14H8orf88	1	turquoise
ENSBTAG00000055062	SMAD5	1	turquoise
ENSBTAG00000000153	LRFN3	4	yellow
ENSBTAG00000000250	HDHD3	4	yellow
ENSBTAG00000000418	TOX3	4	yellow
ENSBTAG00000000429	DGCR2	4	yellow
ENSBTAG00000000532	EXO5	4	yellow
ENSBTAG00000000875	CEP131	4	yellow
ENSBTAG00000001323	CENPC	4	yellow
ENSBTAG00000001412	N6AMT1	4	yellow
ENSBTAG00000001614	ZNF174	4	yellow
ENSBTAG00000001645	AAR2	4	yellow
ENSBTAG00000002095	MEN1	4	yellow
ENSBTAG00000002389	MED19	4	yellow
ENSBTAG00000002879	DCPS	4	yellow
ENSBTAG00000002904	ZNF787	4	yellow
ENSBTAG00000002920	KAT6B	4	yellow
ENSBTAG00000003144	KIAA0825	4	yellow
ENSBTAG00000003693	SUN2	4	yellow
ENSBTAG00000003817	RNF25	4	yellow
ENSBTAG00000003956	SGCA	4	yellow
ENSBTAG00000004188	SNAP47	4	yellow
ENSBTAG00000004199	DIABLO	4	yellow
ENSBTAG00000004222	SAT2	4	yellow
ENSBTAG00000004502	CLUAP1	4	yellow
ENSBTAG00000004601	ABHD10	4	yellow
ENSBTAG00000004750	VSTM2L	4	yellow
ENSBTAG00000004997	CTNNAL1	4	yellow
ENSBTAG00000005028	HIRIP3	4	yellow
ENSBTAG00000005082	MED21	4	yellow
ENSBTAG00000005198	FGF1	4	yellow
ENSBTAG00000005312	MED26	4	yellow
ENSBTAG00000005533	PPP2R5D	4	yellow
ENSBTAG00000005897	FNTB	4	yellow
ENSBTAG00000006272	NTHL1	4	yellow
ENSBTAG00000006277	ENGASE	4	yellow
ENSBTAG00000006349	EXTL1	4	yellow
ENSBTAG00000007112	IFT25	4	yellow
ENSBTAG00000007123	ENSA	4	yellow
ENSBTAG00000007757	PRPF31	4	yellow
ENSBTAG00000007813	CMC4	4	yellow
ENSBTAG00000007834	PPP1R16A	4	yellow
ENSBTAG00000007930	NCOA6	4	yellow
ENSBTAG00000007934	MRPS17	4	yellow
ENSBTAG00000008136	SNW1	4	yellow
ENSBTAG00000008196	SWSAP1	4	yellow
ENSBTAG00000008296	EEF1AKMT1	4	yellow
ENSBTAG00000008412	BCL7C	4	yellow
ENSBTAG00000008528	SLC25A1	4	yellow
ENSBTAG00000008539	ENHO	4	yellow
ENSBTAG00000008644	KCNK4	4	yellow
ENSBTAG00000008935	PFDN5	4	yellow
ENSBTAG00000009293	EVL	4	yellow
ENSBTAG00000009351	ATXN10	4	yellow
ENSBTAG00000009405	TRPC4	4	yellow
ENSBTAG00000009928	MLST8	4	yellow
ENSBTAG00000010111	TCF7L1	4	yellow
ENSBTAG00000010119	ALDH1A2	4	yellow
ENSBTAG00000010126	PCIF1	4	yellow
ENSBTAG00000010343	C1QTNF7	4	yellow
ENSBTAG00000010904	PAGR1	4	yellow
ENSBTAG00000011442	SPAG8	4	yellow
ENSBTAG00000011586	HABP4	4	yellow
ENSBTAG00000011651	HECTD2	4	yellow
ENSBTAG00000011656	PRPF6	4	yellow
ENSBTAG00000012156	NAIF1	4	yellow
ENSBTAG00000012262	FBXO10	4	yellow
ENSBTAG00000012284	CLCN2	4	yellow
ENSBTAG00000012692	LOC100295687	4	yellow
ENSBTAG00000012771	CSF1R	4	yellow
ENSBTAG00000012796	ZNF428	4	yellow
ENSBTAG00000012880	DNLZ	4	yellow
ENSBTAG00000012999	PRDM4	4	yellow
ENSBTAG00000013076	SNX19	4	yellow
ENSBTAG00000013288	SUGP2	4	yellow
ENSBTAG00000013311	GSPT2	4	yellow
ENSBTAG00000013353	ZNF274	4	yellow
ENSBTAG00000013528	CHMP7	4	yellow
ENSBTAG00000013941	TANGO6	4	yellow
ENSBTAG00000014043	ERCC5	4	yellow
ENSBTAG00000015104	CCDC28B	4	yellow
ENSBTAG00000015499	VPS51	4	yellow
ENSBTAG00000015604	ZNF385A	4	yellow
ENSBTAG00000016096	SYP	4	yellow
ENSBTAG00000016190	ZNF394	4	yellow
ENSBTAG00000017165	MATN2	4	yellow
ENSBTAG00000017879	C9H6orf163	4	yellow
ENSBTAG00000018314	MED11	4	yellow
ENSBTAG00000018401	APLF	4	yellow
ENSBTAG00000018638	CC2D2A	4	yellow
ENSBTAG00000018691	RHOU	4	yellow
ENSBTAG00000018753	TMEM163	4	yellow
ENSBTAG00000019071	COMMD10	4	yellow
ENSBTAG00000019217	KIF13A	4	yellow
ENSBTAG00000019509	NUDT5	4	yellow
ENSBTAG00000019533	ADTRP	4	yellow
ENSBTAG00000019568	IFT74	4	yellow
ENSBTAG00000019867	COMMD1	4	yellow
ENSBTAG00000020512	GJB1	4	yellow
ENSBTAG00000020559	STMND1	4	yellow
ENSBTAG00000021216	HECW1	4	yellow
ENSBTAG00000021422	PDZD4	4	yellow
ENSBTAG00000021715	ADPRS	4	yellow
ENSBTAG00000021764	GLRB	4	yellow
ENSBTAG00000021859	PDSS2	4	yellow
ENSBTAG00000021870	FAM98B	4	yellow
ENSBTAG00000021884	CXXC1	4	yellow
ENSBTAG00000021992	CAVIN4	4	yellow
ENSBTAG00000023472	PPP1R14A	4	yellow
ENSBTAG00000025071	TENM2	4	yellow
ENSBTAG00000025442	HSPA1L	4	yellow
ENSBTAG00000025762	CNP	4	yellow
ENSBTAG00000026309	ZHX2	4	yellow
ENSBTAG00000026610	SMCO3	4	yellow
ENSBTAG00000030347	TUBG2	4	yellow
ENSBTAG00000031238	SHCBP1L	4	yellow
ENSBTAG00000031583	NUPR2	4	yellow
ENSBTAG00000031725	TNFSF12	4	yellow
ENSBTAG00000032684	DYNLT2B	4	yellow
ENSBTAG00000035064	C4H7orf57	4	yellow
ENSBTAG00000035782	METTL22	4	yellow
ENSBTAG00000038221	EFNA2	4	yellow
ENSBTAG00000038949	MRPL30	4	yellow
ENSBTAG00000043581	TXNRD2	4	yellow
ENSBTAG00000043974	ZNF768	4	yellow
ENSBTAG00000044144	GUCY1A2	4	yellow
ENSBTAG00000047062	LRP3	4	yellow
ENSBTAG00000049277	DISP1	4	yellow
ENSBTAG00000049426	LOC781298	4	yellow
ENSBTAG00000050386	MGMT	4	yellow
ENSBTAG00000050453	ZNF835	4	yellow
ENSBTAG00000050621	PCBD2	4	yellow
ENSBTAG00000050722	PHPT1	4	yellow
ENSBTAG00000052796	LOC614914	4	yellow
ENSBTAG00000053406	FMC1	4	yellow
ENSBTAG00000055281	LOC100848357	4	yellow

## Sheet: Table S2
Supplementary File, Table S2. The complete list of the functional enrichment analysis results for turquoise module.
Biological Process	Overlap	P.value	Adjusted.P.value	Odds.Ratio	Combined.Score	Genes				KEGG Pathway	Overlap	P.value	Adjusted.P.value	Odds.Ratio	Combined.Score	Genes
Modification-Dependent Protein Catabolic Process (GO:0019941)	9/208	0.000793774	0.39226	3.93307	28.077	ANKIB1;AREL1;TTC3;UBC;RLIM;UBE3A;FBXO45;UBE3B;FBXO11	.			Phosphatidylinositol signaling system	6/97	0.000979675	0.206711	5.68971	39.4199	DGKG;MTMR1;INPPL1;PIK3R3;OCRL;PRKCA	.
Cilium Organization (GO:0044782)	9/230	0.00160107	0.39226	3.53756	22.7715	IFT140;TCTN1;CCP110;BBS9;NEK1;DCDC2;OCRL;KIFAP3;SEPTIN7	.			Aldosterone-regulated sodium reabsorption	3/37	0.00916531	0.830652	7.53705	35.3663	FXYD4;PIK3R3;PRKCA	.
Transcription by RNA Polymerase II (GO:0006366)	8/200	0.00251479	0.39226	3.60878	21.6006	PBRM1;SUPT16H;THRB;PARP1;ELP2;TTF2;SOX5;MED17	.			Axon guidance	6/182	0.0204156	0.830652	2.92913	11.3986	EPHA5;PIK3R3;PRKCA;LRIG2;EFNA5;GDF7	.
Organelle Assembly (GO:0070925)	11/346	0.0026378	0.39226	2.86113	16.9889	PACS2;IFT140;PSPC1;TCTN1;ATG10;BBS9;NEK1;DCDC2;OCRL;AMBRA1;SEPTIN7	.			Fc gamma R-mediated phagocytosis	4/97	0.0271894	0.830652	3.67892	13.2622	INPPL1;PIK3R3;PRKCA;DOCK1	.
Positive Regulation of Cell Differentiation (GO:0045597)	10/297	0.00271234	0.39226	3.02996	17.9069	BLOC1S5;PBRM1;IMPACT;SMARCB1;CARM1;AGTR1;ZNF268;SMAD5;SOX5;EZH2	.			GnRH secretion	3/64	0.0391031	0.830652	4.19523	13.5991	PIK3R3;PRKCA;HCN1	.
Regulation of Cell Division (GO:0051302)	5/85	0.00322441	0.39226	5.37282	30.8239	PDZD2;TADA2A;NLRP5;CCP110;KAT14	.			Fc epsilon RI signaling pathway	3/68	0.0454843	0.830652	3.93626	12.1646	IL4;PIK3R3;PRKCA	.
Regulation of Signal Transduction (GO:0009966)	8/211	0.00348783	0.39226	3.41131	19.3028	KCTD8;HOMER1;KCNIP1;GNG4;TMEM108;DCDC2;SYNJ2BP;CX3CL1	.			Mitophagy	3/68	0.0454843	0.830652	3.93626	12.1646	UBC;USP30;AMBRA1	.
Nucleic Acid Transport (GO:0050657)	2/8	0.00364335	0.39226	28.3908	159.41	RBFOX1;CKAP5	.			Hepatocellular carcinoma	5/168	0.0478177	0.830652	2.62585	7.98352	PBRM1;SMARCB1;DVL2;PIK3R3;PRKCA	.
Positive Regulation of DNA-templated Transcription, Elongation (GO:0032786)	4/54	0.00365376	0.39226	6.85774	38.4856	SUPT16H;PARP1;LDB2;MED17	.			Glyoxylate and dicarboxylate metabolism	2/30	0.0478435	0.830652	6.07697	18.4729	SHMT1;CAT	.
Regulation of Insulin Secretion Involved in Cellular Response to Glucose Stimulus (GO:0061178)	3/28	0.00417373	0.39226	10.2551	56.1869	EPHA5;EFNA5;CDK16	.			Thyroid hormone signaling pathway	4/121	0.0538896	0.830652	2.9207	8.53083	THRB;PIK3R3;PRKCA;MED17	.
Protein Ubiquitination (GO:0016567)	11/369	0.00428749	0.39226	2.67415	14.5796	NPEPPS;AREL1;CUL2;UBC;RLIM;UBE3A;FBXO45;KLHL12;UBE3B;AMBRA1;FBXO11	.			Inositol phosphate metabolism	3/73	0.0541371	0.830652	3.65417	10.6564	MTMR1;INPPL1;OCRL	.
DNA-templated Transcription Elongation (GO:0006354)	3/29	0.00461555	0.39226	9.86014	53.031	PBRM1;SUPT16H;ELP2	.			Arrhythmogenic right ventricular cardiomyopathy	3/77	0.061584	0.830652	3.45595	9.63295	SGCD;CDH2;SGCB	.
Transcription Elongation by RNA Polymerase II (GO:0006368)	3/29	0.00461555	0.39226	9.86014	53.031	PBRM1;SUPT16H;ELP2	.			Bacterial invasion of epithelial cells	3/77	0.061584	0.830652	3.45595	9.63295	ARHGAP10;PIK3R3;DOCK1	.
Regulation of Response to External Stimulus (GO:0032101)	6/132	0.00463475	0.39226	4.10192	22.0444	NLRP13;AREL1;NLRP5;AGTR1;TTF2;CX3CL1	.			Various types of N-glycan biosynthesis	2/39	0.0761629	0.830652	4.59669	11.8359	CHST8;STT3B	.
Regulation of Insulin Secretion (GO:0050796)	5/93	0.00473939	0.39226	4.88239	26.1298	EPHA5;PRKCA;ABCA12;EFNA5;CDK16	.			Autophagy	4/137	0.0774084	0.830652	2.56724	6.56871	ATG10;PIK3R3;AMBRA1;CAMKK2	.
Regulation of GTPase Activity (GO:0043087)	6/134	0.00498476	0.39226	4.03742	21.4038	EPHA5;PDZD2;SIPA1L1;EFNA5;RGS7;EZH2	.			Ubiquitin mediated proteolysis	4/140	0.0823084	0.830652	2.51023	6.26875	CUL2;UBC;UBE3A;UBE3B	.
Regulation of Embryonic Development (GO:0045995)	4/59	0.00502519	0.39226	6.23273	32.9916	TADA2A;NLRP5;KAT14;SEPTIN7	.			Diabetic cardiomyopathy	5/203	0.090563	0.830652	2.15782	5.18246	PARP1;AGTR1;PIK3R3;PRKCA;NDUFS1	.
Autophagy of Mitochondrion (GO:0000422)	4/61	0.00565856	0.40269	6.01342	31.117	LRBA;ATG10;USP30;AMBRA1	.			Phospholipase D signaling pathway	4/148	0.0960985	0.830652	2.36981	5.55099	DGKG;AGTR1;PIK3R3;PRKCA	.
Positive Regulation of CREB Transcription Factor Activity (GO:0032793)	2/10	0.00576572	0.40269	21.2909	109.772	EPHA5;CRTC1	.			Choline metabolism in cancer	3/98	0.107645	0.830652	2.68913	5.99386	DGKG;PIK3R3;PRKCA	.
Regulation of Postsynapse Organization (GO:0099175)	3/32	0.00610621	0.405147	8.83878	45.0641	SIPA1L1;HOMER1;DOCK1	.			Glycerophospholipid metabolism	3/98	0.107645	0.830652	2.68913	5.99386	DGKG;ETNK2;CRLS1	.
Positive Regulation of T Cell Differentiation (GO:0045582)	4/64	0.00670506	0.410489	5.71188	28.5874	IL4;PBRM1;SMARCB1;AMBRA1	.			Sphingolipid metabolism	2/49	0.112196	0.830652	3.61684	7.91188	SMPD3;CERS6	.
Regulation of Cell Cycle Process (GO:0010564)	6/146	0.00750528	0.410489	3.6891	18.0476	PBRM1;SMARCB1;PDZD2;CCP110;RCC1;CDK16	.			AGE-RAGE signaling pathway in diabetic complications	3/100	0.11258	0.830652	2.63342	5.75161	AGTR1;PIK3R3;PRKCA	.
Positive Regulation of DNA-templated Transcription (GO:0045893)	25/1274	0.00787195	0.410489	1.77338	8.59105	SMARCB1;THRB;CRTC1;PRDM5;RORB;LDB2;CX3CL1;MED17;CAMKK2;ZNF609;PDZD2;DVL2;ZNF268;TEAD1;TEAD2;SUPT16H;PARP1;NEK4;SMAD5;GDF7;IL4;CARM1;ASXL3;SSBP2;NFE2L1	.			Longevity regulating pathway	3/102	0.117601	0.830652	2.57996	5.52228	CAT;PIK3R3;CAMKK2	.
Sphingomyelin Metabolic Process (GO:0006684)	2/12	0.00832715	0.410489	17.031	81.5486	SMPD3;SAMD8	.			Hippo signaling pathway	4/163	0.124627	0.830652	2.1446	4.46597	DVL2;TEAD1;TEAD2;GDF7	.
Regulation of ATP Biosynthetic Process (GO:2001169)	2/12	0.00832715	0.410489	17.031	81.5486	IL4;PARP1	.			Endocrine and other factor-regulated calcium reabsorption	2/53	0.127635	0.830652	3.33249	6.86019	PRKCA;AP2A2	.
Regulation of Heart Contraction (GO:0008016)	4/70	0.00916571	0.410489	5.19104	24.3578	KCNIP1;RNF207;PRKCA;SCN4B	.			HIF-1 signaling pathway	3/109	0.135804	0.830652	2.40872	4.80913	CUL2;PIK3R3;PRKCA	.
Glycerophospholipid Biosynthetic Process (GO:0046474)	5/110	0.00952137	0.410489	4.08838	19.0282	DGKG;MTMR1;ETNK2;INPPL1;OCRL	.			Ras signaling pathway	5/232	0.136966	0.830652	1.87936	3.73622	GNG4;PIK3R3;PRKCA;KSR2;EFNA5	.
P-body Assembly (GO:0033962)	2/13	0.00976579	0.410489	15.482	71.664	LSM14A;EDC3	.			Non-homologous end-joining	1/13	0.141907	0.830652	7.06509	13.7952	RAD50	.
pre-miRNA Processing (GO:0031054)	2/13	0.00976579	0.410489	15.482	71.664	AGO3;DROSHA	.			Cholinergic synapse	3/113	0.146614	0.830652	2.32066	4.45556	GNG4;PIK3R3;PRKCA	.
Protein Localization to Phagophore Assembly Site (GO:0034497)	2/13	0.00976579	0.410489	15.482	71.664	PACS2;LRBA	.			Glutamatergic synapse	3/114	0.149359	0.830652	2.29964	4.37253	HOMER1;GNG4;PRKCA	.
Regulation of DNA-templated Transcription Elongation (GO:0032784)	3/38	0.00986635	0.410489	7.32134	33.8145	SUPT16H;PARP1;INTS3	.			Leukocyte transendothelial migration	3/114	0.149359	0.830652	2.29964	4.37253	PIK3R3;PRKCA;ARHGAP5	.
Positive Regulation of Lymphocyte Differentiation (GO:0045621)	3/39	0.0105978	0.410489	7.1176	32.3645	IL4;PBRM1;SMARCB1	.			VEGF signaling pathway	2/59	0.151636	0.830652	2.98079	5.62258	PIK3R3;PRKCA	.
Negative Regulation of Cell-Substrate Adhesion (GO:0010812)	3/39	0.0105978	0.410489	7.1176	32.3645	SPOCK1;EFNA5;CX3CL1	.			Viral myocarditis	2/60	0.15572	0.830652	2.92925	5.44752	SGCD;SGCB	.
Negative Regulation of Neuroinflammatory Response (GO:0150079)	2/14	0.0113062	0.410489	14.1911	63.6102	IL4;CX3CL1	.			Sphingolipid signaling pathway	3/119	0.163329	0.830652	2.19996	3.9863	CERS6;PIK3R3;PRKCA	.
Stem Cell Development (GO:0048864)	2/15	0.0129459	0.410489	13.0988	56.9402	CDH2;KLHL12	.			Endocytosis	5/252	0.173995	0.830652	1.72542	3.01729	RAB4A;PSD3;AGAP1;AP2A2;IGF2R	.
Ceramide Biosynthetic Process (GO:0046513)	3/42	0.0129765	0.410489	6.5691	28.5402	SAMD8;CERS6;MECR	.			Aminoacyl-tRNA biosynthesis	2/66	0.180624	0.830652	2.65383	4.5416	CARS2;FARSB	.
Ephrin Receptor Signaling Pathway (GO:0048013)	3/43	0.0138316	0.410489	6.40455	27.4166	EPHA5;SIPA1L1;EFNA5	.			Fatty acid biosynthesis	1/18	0.19098	0.830652	4.98586	8.25452	MECR	.
Regulation of Transcription Elongation by RNA Polymerase II (GO:0034243)	4/79	0.0138511	0.410489	4.56603	19.5398	PARP1;INTS3;LDB2;MED17	.			Relaxin signaling pathway	3/129	0.192345	0.830652	2.02432	3.33702	GNG4;PIK3R3;PRKCA	.
Regulation of Cell Cycle G1/S Phase Transition (GO:1902806)	4/79	0.0138511	0.410489	4.56603	19.5398	PBRM1;SMARCB1;AMBRA1;EZH2	.			Renal cell carcinoma	2/69	0.193291	0.830652	2.53461	4.16579	CUL2;PIK3R3	.
Cellular Response to Oxidative Stress (GO:0034599)	5/121	0.01396	0.410489	3.69861	15.7988	PARP1;FANCC;PYCR2;NFE2L1;CAMKK2	.			FoxO signaling pathway	3/131	0.198299	0.830652	1.99249	3.22381	HOMER1;CAT;PIK3R3	.
Photoreceptor Cell Development (GO:0042461)	2/16	0.0146823	0.410489	12.1626	51.3395	CFAP418;RORB	.			Non-small cell lung cancer	2/72	0.206068	0.830652	2.42562	3.83138	PIK3R3;PRKCA	.
tRNA Wobble Base Modification (GO:0002097)	2/16	0.0146823	0.410489	12.1626	51.3395	ELP2;ELP3	.			Focal adhesion	4/201	0.209757	0.830652	1.72757	2.69812	PIK3R3;PRKCA;ARHGAP5;DOCK1	.
tRNA Wobble Uridine Modification (GO:0002098)	2/16	0.0146823	0.410489	12.1626	51.3395	ELP2;ELP3	.			One carbon pool by folate	1/20	0.209818	0.830652	4.46058	6.96527	SHMT1	.
Protein-Containing Complex Organization (GO:0043933)	5/123	0.0148941	0.410489	3.63556	15.294	NUP133;FANCC;KIFAP3;TEAD1;TEAD2	.			Glioma	2/75	0.218934	0.830652	2.32558	3.53252	PIK3R3;PRKCA	.
Protein Tetramerization (GO:0051262)	4/83	0.016343	0.410489	4.33396	17.8297	HOMER1;SHMT1;FARSB;HCN1	.			Thyroid hormone synthesis	2/75	0.218934	0.830652	2.32558	3.53252	PRKCA;TTF2	.
Negative Regulation of Telomere Maintenance (GO:0032205)	2/17	0.016513	0.410489	11.3511	46.5807	RAD50;PARP1	.			Terpenoid backbone biosynthesis	1/22	0.228219	0.830652	4.03536	5.96204	MVD	.
Myoblast Fusion (GO:0007520)	2/17	0.016513	0.410489	11.3511	46.5807	PTGFRN;DOCK1	.			Apoptosis	3/142	0.231765	0.830652	1.83378	2.68105	PARP1;PIK3R3;PTPN13	.
Protein Localization to Cilium (GO:0061512)	3/46	0.0165853	0.410489	5.95681	24.4184	IFT140;TCTN1;BBS9	.			Rap1 signaling pathway	4/210	0.231964	0.830652	1.65133	2.41288	SIPA1L1;PIK3R3;PRKCA;EFNA5	.
Regulation of T Cell Differentiation (GO:0045580)	3/47	0.0175663	0.410489	5.82113	23.5277	IL4;PBRM1;SMARCB1	.			Signaling pathways regulating pluripotency of stem cells	3/143	0.23486	0.830652	1.82059	2.63762	DVL2;PIK3R3;SMAD5	.
Protein Polyubiquitination (GO:0000209)	7/228	0.0180997	0.410489	2.72719	10.9411	NPEPPS;AREL1;TTC3;UBE3A;FBXO45;UBE3B;AMBRA1	.			Spinocerebellar ataxia	3/143	0.23486	0.830652	1.82059	2.63762	PIK3R3;PRKCA;AMBRA1	.
Neural Crest Cell Differentiation (GO:0014033)	2/18	0.0184355	0.410489	10.6412	42.4953	CDH2;KLHL12	.			RNA degradation	2/79	0.236187	0.830652	2.20432	3.18113	CNOT10;EDC3	.
Positive Regulation of Muscle Hypertrophy (GO:0014742)	2/18	0.0184355	0.410489	10.6412	42.4953	PARP1;PRKCA	.			Renin-angiotensin system	1/23	0.237258	0.830652	3.85174	5.54113	AGTR1	.
Replication Fork Processing (GO:0031297)	3/48	0.0185792	0.410489	5.69149	22.6846	RAD50;PARP1;CARM1	.			B cell receptor signaling pathway	2/81	0.244843	0.830652	2.1483	3.02295	INPPL1;PIK3R3	.
Mitophagy (GO:0000423)	3/48	0.0185792	0.410489	5.69149	22.6846	LRBA;ATG10;AMBRA1	.			Retrograde endocannabinoid signaling	3/148	0.250437	0.830652	1.75737	2.43316	GNG4;PRKCA;NDUFS1	.
Ubiquitin-Dependent Protein Catabolic Process (GO:0006511)	11/455	0.0186258	0.410489	2.14663	8.55047	ANKIB1;AREL1;APPBP2;TTC3;RLIM;UBE3A;FBXO45;KLHL12;UBE3B;AMBRA1;FBXO11	.			Adrenergic signaling in cardiomyocytes	3/150	0.256711	0.830652	1.73328	2.35692	AGTR1;PRKCA;SCN4B	.
mRNA Catabolic Process (GO:0006402)	3/49	0.0196238	0.410489	5.56748	21.8858	AGO3;CNOT10;DIS3L2	.			ErbB signaling pathway	2/85	0.262187	0.830652	2.04435	2.73677	PIK3R3;PRKCA	.
Positive Regulation of Cell Migration (GO:0030335)	9/344	0.0203813	0.410489	2.32012	9.03254	IL4;ZNF609;PIK3R3;PRKCA;ELP3;ZNF268;DOCK1;CX3CL1;EZH2	.			mTOR signaling pathway	3/154	0.269323	0.830652	1.68702	2.21311	DVL2;PIK3R3;PRKCA	.
Regulation of Nuclear Division (GO:0051783)	2/19	0.0204474	0.410489	10.0147	38.9562	PDZD2;RCC1	.			Human cytomegalovirus infection	4/225	0.270134	0.830652	1.53807	2.01308	GNG4;PIK3R3;PRKCA;CX3CL1	.
Regulation of RNA Biosynthetic Process (GO:2001141)	11/465	0.0214624	0.410489	2.09826	8.06037	TADA2A;PSPC1;CARM1;ATF7IP2;DVL2;RORB;SSBP2;ZNF268;KAT14;TEAD2;EZH2	.			Fatty acid elongation	1/27	0.272375	0.830652	3.2585	4.23792	MECR	.
Calcium-Mediated Signaling (GO:0019722)	4/91	0.0221268	0.410489	3.93383	14.9917	RCAN3;AGTR1;KSR2;CAMKK2	.			GABAergic synapse	2/89	0.279539	0.830652	1.94996	2.48545	GNG4;PRKCA	.
Positive Regulation of Transcription by RNA Polymerase II (GO:0045944)	19/983	0.0223895	0.410489	1.72362	6.54832	SMARCB1;THRB;PARP1;CRTC1;PRDM5;RORB;LDB2;SMAD5;CX3CL1;MED17;IL4;ZNF609;PDZD2;ASXL3;DVL2;SSBP2;ZNF268;TEAD1;NFE2L1	.			Hypertrophic cardiomyopathy	2/90	0.283874	0.830652	1.9277	2.42741	SGCD;SGCB	.
Nucleosome Disassembly (GO:0006337)	2/20	0.0225465	0.410489	9.45785	35.8659	SUPT16H;SMARCB1	.			Morphine addiction	2/91	0.288206	0.830652	1.90595	2.37115	GNG4;PRKCA	.
Oogenesis (GO:0048477)	2/20	0.0225465	0.410489	9.45785	35.8659	REC114;RBM46	.			TGF-beta signaling pathway	2/94	0.301185	0.830652	1.84352	2.21228	SMAD5;GDF7	.
Positive Regulation of Cardiac Muscle Hypertrophy (GO:0010613)	2/20	0.0225465	0.410489	9.45785	35.8659	PARP1;PRKCA	.			Asthma	1/31	0.305882	0.830652	2.82346	3.34455	IL4	.
Hippo Signaling (GO:0035329)	2/20	0.0225465	0.410489	9.45785	35.8659	TEAD1;TEAD2	.			Circadian rhythm	1/31	0.305882	0.830652	2.82346	3.34455	RORB	.
Regulation of Hydrolase Activity (GO:0051336)	3/52	0.0229488	0.410489	5.22582	19.7248	EPHA5;SIPA1L1;EFNA5	.			Dilated cardiomyopathy	2/96	0.309815	0.830652	1.80411	2.11402	SGCD;SGCB	.
Positive Regulation of DNA Repair (GO:0045739)	4/93	0.0237442	0.410489	3.84504	14.3821	PBRM1;RAD50;SMARCB1;PARP1	.			Circadian entrainment	2/97	0.314123	0.830652	1.78503	2.06701	GNG4;PRKCA	.
Membraneless Organelle Assembly (GO:0140694)	5/139	0.0238986	0.410489	3.19885	11.9443	PSPC1;RCC1;SUGT1;LSM14A;EDC3	.			Aldosterone synthesis and secretion	2/98	0.318424	0.830652	1.76634	2.02135	AGTR1;PRKCA	.
Ceramide Metabolic Process (GO:0006672)	3/53	0.0241209	0.410489	5.12104	19.0742	CERS6;MECR;SAMD8	.			Inflammatory mediator regulation of TRP channels	2/98	0.318424	0.830652	1.76634	2.02135	PIK3R3;PRKCA	.
Positive Regulation of Double-Strand Break Repair (GO:2000781)	4/94	0.0245791	0.410489	3.80213	14.0901	PBRM1;RAD50;SMARCB1;PARP1	.			Pathways of neurodegeneration	7/475	0.321726	0.830652	1.27157	1.44203	UBC;SIGMAR1;CAT;DVL2;PRKCA;NDUFS1;AMBRA1	.
Cellular Response to Nerve Growth Factor Stimulus (GO:1990090)	2/21	0.0247304	0.410489	8.95962	33.1481	KIDINS220;TMEM108	.			Base excision repair	1/33	0.322055	0.830652	2.64673	2.99883	PARP1	.
Regulation of Cell-Substrate Junction Assembly (GO:0090109)	2/21	0.0247304	0.410489	8.95962	33.1481	LDB2;EFNA5	.			Shigellosis	4/246	0.325149	0.830652	1.40309	1.57633	UBC;PIK3R3;DOCK1;SEPTIN7	.
Plasma Membrane Bounded Cell Projection Organization (GO:0120036)	5/141	0.0252247	0.410489	3.15149	11.5973	BLOC1S5;DOCK7;TMEM108;KIFAP3;CDK16	.			Influenza A	3/172	0.326695	0.830652	1.50596	1.68476	PIK3R3;PRKCA;PABPN1L	.
mRNA Destabilization (GO:0061157)	3/54	0.0253248	0.410489	5.02037	18.4547	AGO3;PABPN1L;DIS3L2	.			Melanogenesis	2/101	0.33129	0.830652	1.71256	1.89197	DVL2;PRKCA	.
Generation of Neurons (GO:0048699)	6/192	0.0257138	0.410489	2.77023	10.1411	PDZD2;DTNB;DCDC2;SPOCK1;ELP3;LDB2	.			Amoebiasis	2/102	0.335563	0.830652	1.69534	1.85122	PIK3R3;PRKCA	.
Regulation of DNA-templated Transcription (GO:0006355)	35/2139	0.0258478	0.410489	1.47642	5.39708	ZBTB8A;SMARCB1;ATF7IP2;PRDM5;RORB;LDB2;MED17;CAMKK2;ZNF609;ZNF629;DVL2;ZNF268;TEAD1;KAT14;TEAD2;ZNF641;SOX5;PBRM1;PARP1;NEK4;ZFP3;ZBTB10;ELP2;ELP3;SMAD5;GDF7;IL4;TADA2A;PSPC1;SP4;CARM1;RLIM;SSBP2;NFE2L1;EZH2	.			T cell receptor signaling pathway	2/104	0.344086	0.830652	1.66193	1.77305	IL4;PIK3R3	.
Cilium Assembly (GO:0060271)	7/247	0.0265904	0.410489	2.50885	9.1001	IFT140;TCTN1;BBS9;NEK1;DCDC2;OCRL;SEPTIN7	.			DNA replication	1/36	0.345613	0.830652	2.4195	2.57056	RNASEH2B	.
protein-DNA Complex Disassembly (GO:0032986)	2/22	0.0269968	0.410489	8.51121	30.7428	SUPT16H;SMARCB1	.			Tyrosine metabolism	1/36	0.345613	0.830652	2.4195	2.57056	GSTZ1	.
Regulation of Protein Localization (GO:0032880)	4/97	0.0271894	0.410489	3.67892	13.2622	PDZD2;PARP1;NLRP5;INPPL1	.			African trypanosomiasis	1/37	0.353283	0.830652	2.35217	2.4474	PRKCA	.
Positive Regulation of Cell Motility (GO:2000147)	7/249	0.0276187	0.410489	2.48786	8.92958	IL4;PIK3R3;PRKCA;ELP3;ZNF268;CX3CL1;EZH2	.			Allograft rejection	1/38	0.360863	0.830652	2.28848	2.33255	IL4	.
Positive Regulation of Protein Modification Process (GO:0031401)	4/98	0.0280949	0.410489	3.63959	13.0012	PDZD2;ATG10;ZNF268;CAMKK2	.			Ribosome biogenesis in eukaryotes	2/108	0.361024	0.830652	1.59889	1.62897	MPHOSPH10;DROSHA	.
Negative Regulation of Protein Metabolic Process (GO:0051248)	5/146	0.0287439	0.410489	3.03896	10.7863	PDZD2;SHMT1;CNOT10;TTF2;LSM14A	.			Glycine, serine and threonine metabolism	1/40	0.37576	0.830652	2.1709	2.12489	SHMT1	.
Cellular Response to Chemical Stress (GO:0062197)	4/100	0.0299594	0.410489	3.56341	12.5001	PARP1;FANCC;PYCR2;NFE2L1	.			TNF signaling pathway	2/112	0.377798	0.830652	1.54044	1.49945	PIK3R3;CX3CL1	.
mRNA Metabolic Process (GO:0016071)	4/101	0.0309185	0.410489	3.52649	12.2595	AGO3;PRKCA;CNOT10;DIS3L2	.			Serotonergic synapse	2/113	0.381964	0.830652	1.52648	1.46913	GNG4;PRKCA	.
Regulation of Translation (GO:0006417)	6/201	0.0312036	0.410489	2.64116	9.15749	IMPACT;SHMT1;ELP2;ELP3;CNOT10;LSM14A	.			Homologous recombination	1/41	0.383078	0.830652	2.11652	2.03084	RAD50	.
Regulation of Lipopolysaccharide-Mediated Signaling Pathway (GO:0031664)	2/24	0.0317686	0.410489	7.73668	26.6859	PRKCA;CX3CL1	.			Tryptophan metabolism	1/42	0.390311	0.830652	2.0648	1.94258	CAT	.
Positive Regulation of Cell Communication (GO:0010647)	2/24	0.0317686	0.410489	7.73668	26.6859	CLSTN2;HOMER1	.			Chemokine signaling pathway	3/192	0.390387	0.830652	1.34522	1.26534	GNG4;PIK3R3;CX3CL1	.
Negative Regulation of Translation (GO:0017148)	4/102	0.0318955	0.410489	3.49033	12.0252	AGO3;SHMT1;CNOT10;LSM14A	.			Kaposi sarcoma-associated herpesvirus infection	3/193	0.393542	0.830652	1.33807	1.24784	GNG4;UBC;PIK3R3	.
DNA-templated Transcription (GO:0006351)	6/203	0.0325198	0.410489	2.61408	8.9556	GTF3C1;SUPT16H;THRB;PARP1;TTF2;SOX5	.			Porphyrin and chlorophyll metabolism	1/43	0.39746	0.830652	2.01553	1.85966	HEPH	.
Regulation of Defense Response (GO:0031347)	4/103	0.0328905	0.410489	3.4549	11.797	NLRP13;AREL1;NLRP5;AGTR1	.			PI3K-Akt signaling pathway	5/354	0.399227	0.830652	1.21476	1.11543	IL4;GNG4;PIK3R3;PRKCA;EFNA5	.
Neuron Migration (GO:0001764)	3/60	0.0332149	0.410489	4.49054	15.2892	SPOCK1;DCDC2;ELP3	.			Growth hormone synthesis, secretion and action	2/119	0.406698	0.830652	1.44776	1.30253	PIK3R3;PRKCA	.
Regulation of Actin Cytoskeleton Organization (GO:0032956)	4/104	0.0339035	0.410489	3.42017	11.5747	EPHA5;INPPL1;DVL2;EFNA5	.			Neurotrophin signaling pathway	2/119	0.406698	0.830652	1.44776	1.30253	KIDINS220;PIK3R3	.
Positive Regulation of Cilium Assembly (GO:0045724)	2/25	0.0342696	0.410489	7.39993	24.9636	CCP110;SEPTIN7	.			AMPK signaling pathway	2/120	0.410775	0.830652	1.43542	1.2771	PIK3R3;CAMKK2	.
Regulation of Cardiac Muscle Hypertrophy (GO:0010611)	2/25	0.0342696	0.410489	7.39993	24.9636	PARP1;PRKCA	.			ABC transporters	1/45	0.411507	0.830652	1.92372	1.70813	ABCA12	.
Regulation of Nucleotide-Excision Repair (GO:2000819)	2/26	0.0368446	0.410489	7.09124	23.4085	PBRM1;SMARCB1	.			Type II diabetes mellitus	1/46	0.418408	0.830652	1.88088	1.63881	PIK3R3	.
Mitotic Cell Cycle Checkpoint Signaling (GO:0007093)	2/26	0.0368446	0.410489	7.09124	23.4085	RAD50;INTS3	.			Amyotrophic lateral sclerosis	5/364	0.42232	0.830652	1.18032	1.01742	NUP133;SIGMAR1;CAT;NDUFS1;AMBRA1	.
Regulation of Chondrocyte Differentiation (GO:0032330)	2/26	0.0368446	0.410489	7.09124	23.4085	CHADL;SOX5	.			Carbohydrate digestion and absorption	1/47	0.425228	0.830652	1.8399	1.57335	PIK3R3	.
Neuron Development (GO:0048666)	5/159	0.039295	0.410489	2.78058	8.99979	EPHA5;BLOC1S5;DOCK7;TMEM108;CDK16	.			Pyruvate metabolism	1/47	0.425228	0.830652	1.8399	1.57335	GLO1	.
Regulation of Proteolysis Involved in Protein Catabolic Process (GO:1903050)	2/27	0.0394915	0.410489	6.80724	21.9988	UBE3A;PRKCA	.			Pathways in cancer	7/531	0.428446	0.830652	1.13238	0.959791	IL4;GNG4;CUL2;AGTR1;DVL2;PIK3R3;PRKCA	.
Regulation of Cell-Matrix Adhesion (GO:0001952)	3/65	0.0406526	0.410489	4.12736	13.2187	LDB2;EFNA5;CX3CL1	.			Proteoglycans in cancer	3/205	0.431034	0.830652	1.25781	1.05854	PIK3R3;DROSHA;PRKCA	.
Positive Regulation of GTPase Activity (GO:0043547)	4/111	0.0415002	0.410489	3.19529	10.1676	PDZD2;SIPA1L1;RGS7;EZH2	.			Intestinal immune network for IgA production	1/48	0.431969	0.830652	1.80066	1.51148	IL4	.
Regulation of Striated Muscle Contraction (GO:0006942)	2/28	0.0422083	0.410489	6.54509	20.7161	RNF207;PRKCA	.			Arginine and proline metabolism	1/50	0.445215	0.830652	1.72699	1.39747	PYCR2	.
Positive Regulation of G Protein-Coupled Receptor Signaling Pathway (GO:0045745)	2/28	0.0422083	0.410489	6.54509	20.7161	PRKCA;TTF2	.			N-Glycan biosynthesis	1/50	0.445215	0.830652	1.72699	1.39747	STT3B	.
Cell-Cell Junction Assembly (GO:0007043)	3/67	0.0438434	0.410489	3.99797	12.5022	CDH2;DSG1;PRKCA	.			Vibrio cholerae infection	1/50	0.445215	0.830652	1.72699	1.39747	PRKCA	.
Regulation of Cellular Localization (GO:0060341)	3/67	0.0438434	0.410489	3.99797	12.5022	PARP1;NLRP5;INPPL1	.			Human immunodeficiency virus 1 infection	3/212	0.452523	0.830652	1.21525	0.963592	GNG4;PIK3R3;PRKCA	.
Plasma Membrane Bounded Cell Projection Assembly (GO:0120031)	7/277	0.0449311	0.410489	2.22666	6.90849	IFT140;TCTN1;BBS9;NEK1;DCDC2;OCRL;SEPTIN7	.			Natural killer cell mediated cytotoxicity	2/131	0.454666	0.830652	1.31228	1.03433	PIK3R3;PRKCA	.
Regulation of Platelet Activation (GO:0010543)	2/29	0.0449929	0.410489	6.30236	19.5452	PRKCA;TTF2	.			Dopaminergic synapse	2/132	0.458564	0.830652	1.30212	1.01521	GNG4;PRKCA	.
Phosphatidylinositol Metabolic Process (GO:0046488)	3/69	0.0471554	0.410489	3.87643	11.8398	MTMR1;INPPL1;OCRL	.			Vascular smooth muscle contraction	2/133	0.462446	0.830652	1.29212	0.996514	AGTR1;PRKCA	.
Negative Regulation of Cytokine Production Involved in Inflammatory Response (GO:1900016)	2/30	0.0478435	0.410489	6.07697	18.4729	PRKCA;TTF2	.			Autoimmune thyroid disease	1/53	0.464509	0.830652	1.6271	1.24762	IL4	.
Regulation of Transcription by RNA Polymerase II (GO:0006357)	35/2250	0.0485711	0.410489	1.39362	4.21531	ZBTB8A;SMARCB1;THRB;CRTC1;PRDM5;RORB;NR2E1;LDB2;CX3CL1;MED17;ZNF609;PDZD2;ZNF629;DVL2;ZNF268;TEAD1;KAT14;TEAD2;ZNF641;SOX5;PBRM1;PARP1;ZFP3;ZBTB10;ELP2;ELP3;SMAD5;IL4;IMPACT;TADA2A;SP4;ASXL3;SSBP2;NFE2L1;EZH2	.			Fanconi anemia pathway	1/54	0.470791	0.830652	1.59632	1.20257	FANCC	.
Modulation of Chemical Synaptic Transmission (GO:0050804)	4/117	0.0487174	0.410489	3.0247	9.1398	SLC4A8;CLSTN2;HOMER1;TMEM108	.			Regulation of lipolysis in adipocytes	1/55	0.477	0.830652	1.56668	1.15972	PIK3R3	.
Amide Biosynthetic Process (GO:0043604)	3/70	0.0488565	0.410489	3.81838	11.5272	CERS6;MECR;SAMD8	.			Apelin signaling pathway	2/137	0.477809	0.830652	1.25358	0.925821	GNG4;AGTR1	.
Regulation of Neuron Migration (GO:2001222)	2/31	0.0507582	0.410489	5.86712	17.488	ZNF609;CX3CL1	.			Insulin signaling pathway	2/137	0.477809	0.830652	1.25358	0.925821	INPPL1;PIK3R3	.
Nuclear-Transcribed mRNA Catabolic Process, Deadenylation-Dependent Decay (GO:0000288)	2/31	0.0507582	0.410489	5.86712	17.488	CNOT10;PABPN1L	.			Yersinia infection	2/137	0.477809	0.830652	1.25358	0.925821	PIK3R3;DOCK1	.
Positive Regulation of Signaling (GO:0023056)	2/31	0.0507582	0.410489	5.86712	17.488	CLSTN2;HOMER1	.			Pyrimidine metabolism	1/56	0.483136	0.830652	1.53812	1.11892	UPP2	.
Autophagosome Assembly (GO:0000045)	3/72	0.0523475	0.410489	3.70732	10.936	PACS2;LRBA;ATG10	.			MicroRNAs in cancer	4/310	0.492309	0.830652	1.106	0.783762	PIK3R3;PRKCA;EFNA5;EZH2	.
Regulation of G Protein-Coupled Receptor Signaling Pathway (GO:0008277)	3/72	0.0523475	0.410489	3.70732	10.936	KCTD8;GNG4;RGS7	.			Endometrial cancer	1/58	0.495193	0.830652	1.484	1.04296	PIK3R3	.
Negative Regulation of Apoptotic Process (GO:0043066)	10/475	0.0535268	0.410489	1.85301	5.42484	IL4;ARHGAP10;AREL1;GLO1;PIK3R3;PRKCA;WDR73;ZNF268;SMAD5;CX3CL1	.			Notch signaling pathway	1/59	0.501117	0.830652	1.45834	1.00759	DVL2	.
Regulation of Metaphase/Anaphase Transition of Cell Cycle (GO:1902099)	2/32	0.053735	0.410489	5.67126	16.581	PBRM1;SMARCB1	.			Long-term depression	1/60	0.506971	0.830652	1.43355	0.973812	PRKCA	.
miRNA Processing (GO:0035196)	2/32	0.053735	0.410489	5.67126	16.581	AGO3;DROSHA	.			Mineral absorption	1/60	0.506971	0.830652	1.43355	0.973812	HEPH	.
Positive Regulation of DNA-binding Transcription Factor Activity (GO:0051091)	5/174	0.0540622	0.410489	2.53185	7.38697	EPHA5;SMARCB1;CRTC1;RTKN2;DVL2	.			Coronavirus disease	3/232	0.511928	0.830652	1.10798	0.741871	AGTR1;PIK3R3;PRKCA	.
Myeloid Leukocyte Differentiation (GO:0002573)	3/74	0.0559558	0.410489	3.60252	10.3868	IL4;PARP1;GLO1	.			Glycerolipid metabolism	1/61	0.512757	0.830652	1.40959	0.941537	DGKG	.
Protein Modification Process (GO:0036211)	11/545	0.0564901	0.410489	1.77652	5.10518	TBCK;PARP1;NEK4;ATG10;NEK1;PRKCA;STT3B;PTPN13;FBXO11;CDK16;CAMKK2	.			Breast cancer	2/147	0.515023	0.830652	1.16653	0.774042	DVL2;PIK3R3	.
Nervous System Development (GO:0007399)	10/480	0.0566409	0.410489	1.83283	5.26209	CHST8;RBFOX1;CDH2;NINJ2;SPOCK1;ELP3;BTBD6;NR2E1;LDB2;EFNA5	.			Gastric cancer	2/149	0.522254	0.830652	1.15054	0.747392	DVL2;PIK3R3	.
Protein Localization to Chromatin (GO:0071168)	2/33	0.0567721	0.410489	5.48804	15.7436	PARP1;TASOR	.			Basal cell carcinoma	1/63	0.524126	0.830652	1.36398	0.881159	DVL2	.
Regulation of G0 to G1 Transition (GO:0070316)	2/33	0.0567721	0.410489	5.48804	15.7436	PBRM1;SMARCB1	.			Lysine degradation	1/63	0.524126	0.830652	1.36398	0.881159	EZH2	.
Negative Regulation of G2/M Transition of Mitotic Cell Cycle (GO:0010972)	2/33	0.0567721	0.410489	5.48804	15.7436	RAD50;INTS3	.			Cortisol synthesis and secretion	1/65	0.535232	0.830652	1.32122	0.825835	AGTR1	.
Regulation of Circadian Sleep/Wake Cycle, Sleep (GO:0045187)	1/5	0.0571524	0.410489	21.2039	60.6862	PARP1	.			Inflammatory bowel disease	1/65	0.535232	0.830652	1.32122	0.825835	IL4	.
Negative Regulation of Erythrocyte Differentiation (GO:0045647)	1/5	0.0571524	0.410489	21.2039	60.6862	LDB2	.			Oxytocin signaling pathway	2/154	0.540014	0.830652	1.11241	0.685422	PRKCA;CAMKK2	.
Negative Regulation of Insulin-Like Growth Factor Receptor Signaling Pathway (GO:0043569)	1/5	0.0571524	0.410489	21.2039	60.6862	INPPL1	.			Cushing syndrome	2/155	0.543511	0.830652	1.10508	0.673774	AGTR1;DVL2	.
L-phenylalanine Catabolic Process (GO:0006559)	1/5	0.0571524	0.410489	21.2039	60.6862	GSTZ1	.			Non-alcoholic fatty liver disease	2/155	0.543511	0.830652	1.10508	0.673774	PIK3R3;NDUFS1	.
L-phenylalanine Metabolic Process (GO:0006558)	1/5	0.0571524	0.410489	21.2039	60.6862	GSTZ1	.			Acute myeloid leukemia	1/67	0.546079	0.830652	1.28105	0.775025	PIK3R3	.
Regulation of Immunoglobulin Mediated Immune Response (GO:0002889)	1/5	0.0571524	0.410489	21.2039	60.6862	IL4	.			Long-term potentiation	1/67	0.546079	0.830652	1.28105	0.775025	PRKCA	.
Negative Regulation of Mitophagy (GO:1901525)	1/5	0.0571524	0.410489	21.2039	60.6862	VPS13C	.			Cellular senescence	2/156	0.54699	0.830652	1.09785	0.662361	RAD50;PIK3R3	.
Regulation of Interleukin-1 Alpha Production (GO:0032650)	1/5	0.0571524	0.410489	21.2039	60.6862	CX3CL1	.			Adipocytokine signaling pathway	1/69	0.556674	0.830652	1.24325	0.728263	CAMKK2	.
Negative Regulation of Neuron Migration (GO:2001223)	1/5	0.0571524	0.410489	21.2039	60.6862	CX3CL1	.			Amphetamine addiction	1/69	0.556674	0.830652	1.24325	0.728263	PRKCA	.
Negative Regulation of Synapse Assembly (GO:0051964)	1/5	0.0571524	0.410489	21.2039	60.6862	PTPN13	.			Renin secretion	1/69	0.556674	0.830652	1.24325	0.728263	AGTR1	.
Anterior/Posterior Axis Specification, Embryo (GO:0008595)	1/5	0.0571524	0.410489	21.2039	60.6862	TASOR	.			Central carbon metabolism in cancer	1/70	0.561879	0.830652	1.22517	0.70627	PIK3R3	.
Regulation of Non-Motile Cilium Assembly (GO:1902855)	1/5	0.0571524	0.410489	21.2039	60.6862	SEPTIN7	.			Prolactin signaling pathway	1/70	0.561879	0.830652	1.22517	0.70627	PIK3R3	.
Regulation of Phospholipase C-activating G Protein-Coupled Receptor Signaling Pathway (GO:1900736)	1/5	0.0571524	0.410489	21.2039	60.6862	TTF2	.			Hepatitis B	2/162	0.567472	0.830652	1.05636	0.598494	PIK3R3;PRKCA	.
Nucleobase Biosynthetic Process (GO:0046112)	1/5	0.0571524	0.410489	21.2039	60.6862	SHMT1	.			JAK-STAT signaling pathway	2/162	0.567472	0.830652	1.05636	0.598494	IL4;PIK3R3	.
Cell Junction Disassembly (GO:0150146)	1/5	0.0571524	0.410489	21.2039	60.6862	CX3CL1	.			Melanoma	1/72	0.572107	0.830652	1.19053	0.664829	PIK3R3	.
Peptidyl-Proline Modification (GO:0018208)	1/5	0.0571524	0.410489	21.2039	60.6862	PDZD2	.			Wnt signaling pathway	2/166	0.580753	0.830652	1.03038	0.559941	DVL2;PRKCA	.
Phosphatidylglycerol Biosynthetic Process (GO:0006655)	1/5	0.0571524	0.410489	21.2039	60.6862	CRLS1	.			PPAR signaling pathway	1/74	0.582097	0.830652	1.1578	0.626506	UBC	.
Plus-End-Directed Organelle Transport Along Microtubule (GO:0072386)	1/5	0.0571524	0.410489	21.2039	60.6862	KIFAP3	.			cGMP-PKG signaling pathway	2/167	0.584026	0.830652	1.02409	0.550763	AGTR1;PDE5A	.
+ Reg of Adenylate Cyclase-Activating GPCR Sgnlng Pway (GO:0106071)	1/5	0.0571524	0.410489	21.2039	60.6862	PRKCA	.			Chronic myeloid leukemia	1/76	0.591855	0.830652	1.12681	0.591005	PIK3R3	.
Dendrite Extension (GO:0097484)	1/5	0.0571524	0.410489	21.2039	60.6862	TMEM108	.			Gastric acid secretion	1/76	0.591855	0.830652	1.12681	0.591005	PRKCA	.
Sphingomyelin Biosynthetic Process (GO:0006686)	1/5	0.0571524	0.410489	21.2039	60.6862	SAMD8	.			Pancreatic cancer	1/76	0.591855	0.830652	1.12681	0.591005	PIK3R3	.
Positive Regulation of Hemoglobin Biosynthetic Process (GO:0046985)	1/5	0.0571524	0.410489	21.2039	60.6862	LDB2	.			Leishmaniasis	1/77	0.596648	0.830652	1.11193	0.57423	IL4	.
Thrombin-Activated Receptor Signaling Pathway (GO:0070493)	1/5	0.0571524	0.410489	21.2039	60.6862	TTF2	.			Synaptic vesicle cycle	1/78	0.601386	0.830652	1.09743	0.558064	AP2A2	.
Tripartite Regional Subdivision (GO:0007351)	1/5	0.0571524	0.410489	21.2039	60.6862	TASOR	.			Peroxisome	1/82	0.619788	0.830652	1.04302	0.49896	CAT	.
Positive Regulation of Microglial Cell Migration (GO:1904141)	1/5	0.0571524	0.410489	21.2039	60.6862	CX3CL1	.			NOD-like receptor signaling pathway	2/181	0.627878	0.830652	0.943315	0.439028	SUGT1;ANTXR2	.
Positive Regulation of Necroptotic Process (GO:0060545)	1/5	0.0571524	0.410489	21.2039	60.6862	PARP1	.			Alzheimer disease	4/369	0.629521	0.830652	0.924407	0.427812	DVL2;PIK3R3;NDUFS1;AMBRA1	.
Positive Regulation of Programmed Necrotic Cell Death (GO:0062100)	1/5	0.0571524	0.410489	21.2039	60.6862	PARP1	.			Colorectal cancer	1/86	0.637344	0.830652	0.993739	0.447626	PIK3R3	.
Prevention of Polyspermy (GO:0060468)	1/5	0.0571524	0.410489	21.2039	60.6862	NLRP5	.			Insulin secretion	1/86	0.637344	0.830652	0.993739	0.447626	PRKCA	.
Lipoprotein Biosynthetic Process (GO:0042158)	1/5	0.0571524	0.410489	21.2039	60.6862	ATG10	.			Alcoholism	2/186	0.642648	0.830652	0.917448	0.405656	GNG4;CAMKK2	.
Regulation of SA Node Cell Action Potential (GO:0098907)	1/5	0.0571524	0.410489	21.2039	60.6862	HCN1	.			Gap junction	1/88	0.645817	0.830652	0.970796	0.42447	PRKCA	.
Negative Regulation of Astrocyte Differentiation (GO:0048712)	1/5	0.0571524	0.410489	21.2039	60.6862	TTF2	.			PD-L1 expression and PD-1 checkpoint pathway in cancer	1/89	0.649979	0.830652	0.959715	0.41346	PIK3R3	.
Intracellular Signaling Cassette (GO:0141124)	8/354	0.0572504	0.410489	1.9868	5.68289	RCAN3;AGTR1;PIK3R3;PRKCA;PDE5A;KSR2;SMAD5;CAMKK2	.			Neutrophil extracellular trap formation	2/189	0.651288	0.830652	0.902591	0.387034	PIK3R3;PRKCA	.
Regulation of Mitotic Cell Cycle (GO:0007346)	4/124	0.0579568	0.410489	2.84725	8.10912	PDZD2;RCC1;PRKCA;ZNF268	.			Small cell lung cancer	1/92	0.662176	0.830652	0.927935	0.382517	PIK3R3	.
Positive Regulation of Transcription by RNA Polymerase I (GO:0045943)	2/34	0.0598677	0.410489	5.31627	14.9686	SMARCB1;CARM1	.			Th1 and Th2 cell differentiation	1/92	0.662176	0.830652	0.927935	0.382517	IL4	.
Regulation of Cardiac Muscle Contraction (GO:0055117)	2/34	0.0598677	0.410489	5.31627	14.9686	RNF207;PRKCA	.			GnRH signaling pathway	1/93	0.666146	0.830652	0.917802	0.372853	PRKCA	.
Phosphorylation (GO:0016310)	7/298	0.0616974	0.410489	2.06375	5.7486	DGKG;TBCK;NEK4;NEK1;PRKCA;CDK16;CAMKK2	.			Salivary secretion	1/93	0.666146	0.830652	0.917802	0.372853	PRKCA	.
Neuron Differentiation (GO:0030182)	5/181	0.0619182	0.410489	2.43028	6.7609	EPHA5;PDZD2;DTNB;SPOCK1;LDB2	.			IL-17 signaling pathway	1/94	0.670071	0.830652	0.907887	0.363492	IL4	.
Cellular Response to cAMP (GO:0071320)	2/35	0.0630201	0.410489	5.15491	14.2497	CRTC1;HCN1	.			Cytokine-cytokine receptor interaction	3/295	0.673729	0.830652	0.866127	0.342057	IL4;CX3CL1;GDF7	.
Macrophage Activation (GO:0042116)	2/35	0.0630201	0.410489	5.15491	14.2497	IL4;CX3CL1	.			Staphylococcus aureus infection	1/95	0.673949	0.830652	0.898183	0.354423	DSG1	.
RNA Biosynthetic Process (GO:0032774)	4/128	0.0636282	0.410489	2.75484	7.58875	THRB;MPHOSPH10;DDX54;TTF2	.			Prostate cancer	1/97	0.68157	0.830652	0.879381	0.337116	PIK3R3	.
Negative Regulation of Gene Expression (GO:0010629)	8/364	0.0651205	0.410489	1.93	5.27182	AGO3;SHMT1;TASOR;CNOT10;SMAD5;LSM14A;EZH2;DIS3L2	.			mRNA surveillance pathway	1/98	0.685314	0.830652	0.870271	0.328856	PABPN1L	.
DNA Metabolic Process (GO:0006259)	7/302	0.0652727	0.410489	2.03535	5.55483	RAD50;SMARCB1;PARP1;INTS3;FANCC;TTF2;REC114	.			Hematopoietic cell lineage	1/99	0.689014	0.830652	0.861347	0.320846	IL4	.
DNA Repair (GO:0006281)	7/302	0.0652727	0.410489	2.03535	5.55483	USP47;RNASEH2B;RAD50;PARP1;INTS3;FANCC;TTF2	.			Viral carcinogenesis	2/203	0.689426	0.830652	0.839123	0.312067	PIK3R3;UBE3A	.
RNA Catabolic Process (GO:0006401)	3/79	0.0654771	0.410489	3.36466	9.17225	RNASEH2B;CNOT10;DIS3L2	.			Progesterone-mediated oocyte maturation	1/100	0.692671	0.830652	0.852603	0.313077	PIK3R3	.
tRNA Aminoacylation for Protein Translation (GO:0006418)	2/36	0.0662275	0.410489	5.00304	13.5816	CARS2;FARSB	.			Viral protein interaction with cytokine and cytokine receptor	1/100	0.692671	0.830652	0.852603	0.313077	CX3CL1	.
Positive Regulation of Release of Sequestered Calcium Ion Into Cytosol (GO:0051281)	2/36	0.0662275	0.410489	5.00304	13.5816	TTF2;CX3CL1	.			Huntington disease	3/306	0.69756	0.830652	0.834212	0.300456	NDUFS1;AMBRA1;AP2A2	.
Regulation of Blood Circulation (GO:1903522)	2/36	0.0662275	0.410489	5.00304	13.5816	KCNIP1;AGTR1	.			Chagas disease	1/102	0.699856	0.830652	0.835635	0.298222	PIK3R3	.
Regulation of Collagen Fibril Organization (GO:1904026)	1/6	0.0681864	0.410489	16.9622	45.5522	CHADL	.			Pancreatic secretion	1/102	0.699856	0.830652	0.835635	0.298222	PRKCA	.
AV Node Cell Action Potential (GO:0086016)	1/6	0.0681864	0.410489	16.9622	45.5522	SCN4B	.			C-type lectin receptor signaling pathway	1/104	0.706874	0.830652	0.819326	0.284227	PIK3R3	.
Regulation of Glial Cell Apoptotic Process (GO:0034350)	1/6	0.0681864	0.410489	16.9622	45.5522	PRKCA	.			NF-kappa B signaling pathway	1/104	0.706874	0.830652	0.819326	0.284227	PARP1	.
Regulation of Hemoglobin Biosynthetic Process (GO:0046984)	1/6	0.0681864	0.410489	16.9622	45.5522	LDB2	.			Toll-like receptor signaling pathway	1/104	0.706874	0.830652	0.819326	0.284227	PIK3R3	.
Regulation of Microglial Cell Migration (GO:1904139)	1/6	0.0681864	0.410489	16.9622	45.5522	CX3CL1	.			Parathyroid hormone synthesis, secretion and action	1/106	0.713729	0.830652	0.803638	0.271029	PRKCA	.
Negative Regulation of Retinoic Acid Receptor Signaling Pathway (GO:0048387)	1/6	0.0681864	0.410489	16.9622	45.5522	EZH2	.			Th17 cell differentiation	1/107	0.717096	0.830652	0.796016	0.264712	IL4	.
Ammonium Homeostasis (GO:0097272)	1/6	0.0681864	0.410489	16.9622	45.5522	RHBG	.			Lipid and atherosclerosis	2/215	0.719336	0.830652	0.791363	0.260696	PIK3R3;PRKCA	.
Negative Regulation of Telomere Capping (GO:1904354)	1/6	0.0681864	0.410489	16.9622	45.5522	RAD50	.			Drug metabolism	1/108	0.720423	0.830652	0.788536	0.258574	UPP2	.
Nuclear-Transcribed mRNA Catabolic Process, Deadenylation-Independent Decay (GO:0031086)	1/6	0.0681864	0.410489	16.9622	45.5522	EDC3	.			Insulin resistance	1/108	0.720423	0.830652	0.788536	0.258574	PIK3R3	.
Regulation of Systemic Arterial Blood Pressure by Renin-Angiotensin (GO:0003081)	1/6	0.0681864	0.410489	16.9622	45.5522	AGTR1	.			Regulation of actin cytoskeleton	2/218	0.726426	0.831175	0.780252	0.249383	PIK3R3;DOCK1	.
Regulation of Translational Initiation in Response to Stress (GO:0043558)	1/6	0.0681864	0.410489	16.9622	45.5522	IMPACT	.			Human T-cell leukemia virus 1 infection	2/219	0.728756	0.831175	0.776617	0.245735	CRTC1;PIK3R3	.
Positive Regulation of Amyloid-Beta Clearance (GO:1900223)	1/6	0.0681864	0.410489	16.9622	45.5522	IL4	.			Human papillomavirus infection	3/331	0.746789	0.847163	0.769639	0.224714	DVL2;PIK3R3;UBE3A	.
Desmosome Assembly (GO:0002159)	1/6	0.0681864	0.410489	16.9622	45.5522	PRKCA	.			Thermogenesis	2/232	0.757541	0.854765	0.732234	0.203325	SMARCB1;NDUFS1	.
Detection of Muscle Stretch (GO:0035995)	1/6	0.0681864	0.410489	16.9622	45.5522	CDH2	.			Platelet activation	1/124	0.768664	0.854895	0.685404	0.180331	PIK3R3	.
Detection of Temperature Stimulus Involved in Sensory Perception (GO:0050961)	1/6	0.0681864	0.410489	16.9622	45.5522	SCRN3	.			Chemical carcinogenesis	2/239	0.771924	0.854895	0.710352	0.183888	PIK3R3;PRKCA	.
Detection of Temperature Stimulus Involved in Sensory Perception of Pain (GO:0050965)	1/6	0.0681864	0.410489	16.9622	45.5522	SCRN3	.			Calcium signaling pathway	2/240	0.773918	0.854895	0.707331	0.181282	AGTR1;PRKCA	.
Subtelomeric Heterochromatin Formation (GO:0031509)	1/6	0.0681864	0.410489	16.9622	45.5522	EZH2	.			Osteoclast differentiation	1/127	0.776739	0.854895	0.668983	0.169019	PIK3R3	.
Tetrahydrofolate Interconversion (GO:0035999)	1/6	0.0681864	0.410489	16.9622	45.5522	SHMT1	.			Lysosome	1/128	0.779368	0.854895	0.663682	0.165438	IGF2R	.
Transcription-Dependent Tethering of RNA Polymerase II Gene DNA at Nuclear Periphery (GO:0000972)	1/6	0.0681864	0.410489	16.9622	45.5522	NUP133	.			Purine metabolism	1/129	0.781966	0.854895	0.658463	0.161945	PDE5A	.
Type B Pancreatic Cell Development (GO:0003323)	1/6	0.0681864	0.410489	16.9622	45.5522	CDH2	.			Parkinson disease	2/249	0.791184	0.857046	0.681244	0.159564	UBC;NDUFS1	.
Proline Metabolic Process (GO:0006560)	1/6	0.0681864	0.410489	16.9622	45.5522	PYCR2	.			Oxidative phosphorylation	1/133	0.792056	0.857046	0.63838	0.148821	NDUFS1	.
Random Inactivation of X Chromosome (GO:0060816)	1/6	0.0681864	0.410489	16.9622	45.5522	RLIM	.			Estrogen signaling pathway	1/137	0.801682	0.859268	0.619477	0.136931	PIK3R3	.
Mitochondrion-Endoplasmic Reticulum Membrane Tethering (GO:1990456)	1/6	0.0681864	0.410489	16.9622	45.5522	PACS2	.			Fluid shear stress and atherosclerosis	1/139	0.806327	0.859268	0.610437	0.131406	PIK3R3	.
Positive Regulation of Developmental Process (GO:0051094)	6/245	0.0687042	0.410489	2.15008	5.75779	PBRM1;SMARCB1;NLRP5;DVL2;ZNF268;SOX5	.			Measles	1/139	0.806327	0.859268	0.610437	0.131406	PIK3R3	.
Regulatory ncRNA-mediated Gene Silencing (GO:0031047)	2/37	0.0694882	0.410489	4.85985	12.9593	AGO3;EZH2	.			Cell adhesion molecules	1/148	0.825926	0.87573	0.572801	0.109548	CDH2	.
Microtubule Polymerization (GO:0046785)	2/37	0.0694882	0.410489	4.85985	12.9593	PDZD2;CKAP5	.			Prion disease	2/273	0.831673	0.877415	0.620149	0.114303	PIK3R3;NDUFS1	.
Small GTPase-mediated Signal Transduction (GO:0007264)	5/188	0.0703867	0.410489	2.33648	6.20044	DOCK7;AGTR1;KSR2;ARHGAP5;RALGPS2	.			Hepatitis C	1/157	0.843549	0.880605	0.539507	0.0917905	PIK3R3	.
Regulation of Gene Expression (GO:0010468)	19/1127	0.070402	0.410489	1.48813	3.9488	ATF7IP2;PIK3R3;RORB;SMAD5;AFF2;IL4;TADA2A;PDZD2;PSPC1;RNF207;CARM1;RBM12B;DVL2;SSBP2;ZNF268;KAT14;TEAD2;EZH2;KDM6A	.			Ribosome	1/158	0.845393	0.880605	0.536043	0.0900301	MRPL19	.
Neuron Projection Extension (GO:1990138)	2/38	0.0728005	0.410489	4.72462	12.3786	IMPACT;TMEM108	.			Necroptosis	1/159	0.847217	0.880605	0.532623	0.0883083	PARP1	.
Regulation of Inflammatory Response (GO:0050727)	6/249	0.0730233	0.410489	2.11425	5.53295	IL4;NLRP13;AREL1;NLRP5;AGTR1;CX3CL1	.			MAPK signaling pathway	2/294	0.861163	0.890713	0.574929	0.0859352	PRKCA;EFNA5	.
Regulation of Cilium Assembly (GO:1902017)	3/83	0.0735923	0.410489	3.19578	8.33847	IFT140;CCP110;DCDC2	.			Protein processing in endoplasmic reticulum	1/171	0.867496	0.892886	0.494724	0.0703224	STT3B	.
Sphingolipid Biosynthetic Process (GO:0030148)	3/83	0.0735923	0.410489	3.19578	8.33847	CERS6;MECR;SAMD8	.			RNA transport	1/186	0.889116	0.910696	0.454263	0.0533887	NUP133	.
Mitochondrion Organization (GO:0007005)	4/135	0.0742259	0.410489	2.6067	6.7791	PARP1;VPS13C;PRKCA;USP30	.			Transcriptional misregulation in cancer	1/192	0.896745	0.914074	0.439858	0.0479373	KDM6A	.
Axonal Transport (GO:0098930)	2/39	0.0761629	0.410489	4.59669	11.8359	BLOC1S5;TMEM108	.			Epstein-Barr virus infection	1/202	0.908317	0.919544	0.417761	0.0401727	PIK3R3	.
Vacuolar Transport (GO:0007034)	2/39	0.0761629	0.410489	4.59669	11.8359	VPS13C;IGF2R	.			Neuroactive ligand-receptor interaction	2/341	0.910828	0.919544	0.494024	0.0461426	THRB;AGTR1	.
Regulation of Protein Phosphorylation (GO:0001932)	4/137	0.0774084	0.410489	2.56724	6.56871	PDZD2;PTPN13;ZNF268;CAMKK2	.			cAMP signaling pathway	1/216	0.92238	0.926772	0.390278	0.0315339	PIK3R3	.
Cell Morphogenesis Involved in Neuron Differentiation (GO:0048667)	3/85	0.0778101	0.410489	3.11752	7.96053	CFAP418;DOCK7;DCDC2	.			Herpes simplex virus 1 infection	3/498	0.933318	0.933318	0.505601	0.0348912	PIK3R3;ZNF268;ZNF641	.
Protein Modification by Small Protein Conjugation (GO:0032446)	7/316	0.0787577	0.410489	1.94173	4.93468	AREL1;CUL2;UBC;ATG10;RLIM;FBXO45;FBXO11	.
Negative Regulation of Glial Cell Apoptotic Process (GO:0034351)	1/7	0.0790919	0.410489	14.1345	35.8612	PRKCA	.
DNA Strand Resection Involved in Replication Fork Processing (GO:0110025)	1/7	0.0790919	0.410489	14.1345	35.8612	RAD50	.
Regulation of Excitatory Synapse Assembly (GO:1904889)	1/7	0.0790919	0.410489	14.1345	35.8612	PTPN13	.
Negative Regulation of Microglial Cell Activation (GO:1903979)	1/7	0.0790919	0.410489	14.1345	35.8612	CX3CL1	.
Regulation of Protein Localization to Cell Cortex (GO:1904776)	1/7	0.0790919	0.410489	14.1345	35.8612	EPB41L2	.
Regulation of Type 2 Mitophagy (GO:1905089)	1/7	0.0790919	0.410489	14.1345	35.8612	VPS13C	.
Regulatory ncRNA-mediated Heterochromatin Formation (GO:0031048)	1/7	0.0790919	0.410489	14.1345	35.8612	EZH2	.
Positive Regulation of ATP Biosynthetic Process (GO:2001171)	1/7	0.0790919	0.410489	14.1345	35.8612	IL4	.
Cellular Response to Thyroid Hormone Stimulus (GO:0097067)	1/7	0.0790919	0.410489	14.1345	35.8612	THRB	.
Positive Regulation of T-helper 2 Cell Cytokine Production (GO:2000553)	1/7	0.0790919	0.410489	14.1345	35.8612	IL4	.
Retinal Rod Cell Development (GO:0046548)	1/7	0.0790919	0.410489	14.1345	35.8612	RORB	.
Positive Regulation of Glial Cell Migration (GO:1903977)	1/7	0.0790919	0.410489	14.1345	35.8612	CX3CL1	.
Positive Regulation of Lipopolysaccharide-Mediated Signaling Pathway (GO:0031666)	1/7	0.0790919	0.410489	14.1345	35.8612	PRKCA	.
Positive Regulation of Neuron Projection Arborization (GO:0150012)	1/7	0.0790919	0.410489	14.1345	35.8612	DVL2	.
Glycine Metabolic Process (GO:0006544)	1/7	0.0790919	0.410489	14.1345	35.8612	SHMT1	.
Protein Localization to Ciliary Transition Zone (GO:1904491)	1/7	0.0790919	0.410489	14.1345	35.8612	TCTN1	.
Meiotic DNA Double-Strand Break Formation (GO:0042138)	1/7	0.0790919	0.410489	14.1345	35.8612	REC114	.
miRNA-mediated Gene Silencing by mRNA Destabilization (GO:0035279)	1/7	0.0790919	0.410489	14.1345	35.8612	AGO3	.
Mitochondrial Large Ribosomal Subunit Assembly (GO:1902775)	1/7	0.0790919	0.410489	14.1345	35.8612	MRM2	.
Mitotic Nuclear Membrane Disassembly (GO:0007077)	1/7	0.0790919	0.410489	14.1345	35.8612	PRKCA	.
Regulation of Amide Metabolic Process (GO:0034248)	1/7	0.0790919	0.410489	14.1345	35.8612	SAMD8	.
Calcium-Dependent Cell-Cell Adhesion via Plasma Membrane Cell Adhesion Molecules (GO:0016339)	2/40	0.0795735	0.410489	4.4755	11.3278	CDH2;DSG1	.
Constitutive Heterochromatin Formation (GO:0140719)	2/40	0.0795735	0.410489	4.4755	11.3278	TASOR;EZH2	.
Female Gamete Generation (GO:0007292)	2/40	0.0795735	0.410489	4.4755	11.3278	REC114;RBM46	.
Regulation of DNA Recombination (GO:0000018)	2/40	0.0795735	0.410489	4.4755	11.3278	IL4;RAD50	.
Negative Regulation of Programmed Cell Death (GO:0043069)	8/382	0.080907	0.410489	1.83541	4.61505	IL4;ARHGAP10;AREL1;GLO1;WDR73;ZNF268;SMAD5;CX3CL1	.
Sodium Ion Transmembrane Transport (GO:0035725)	3/87	0.0821315	0.410489	3.04298	7.60573	SLC4A8;SCN4B;HCN1	.
Regulation of Heart Rate by Cardiac Conduction (GO:0086091)	2/41	0.083031	0.410489	4.36052	10.8513	SCN4B;HCN1	.
Regulation of Monoatomic Ion Transmembrane Transporter Activity (GO:0032412)	2/41	0.083031	0.410489	4.36052	10.8513	HOMER1;SCN4B	.
Positive Regulation of Myoblast Differentiation (GO:0045663)	2/41	0.083031	0.410489	4.36052	10.8513	PBRM1;SMARCB1	.
Heart Contraction (GO:0060047)	2/41	0.083031	0.410489	4.36052	10.8513	SGCD;SCN4B	.
Regulation of Mitotic Cell Cycle Phase Transition (GO:1901990)	3/88	0.0843303	0.410489	3.00703	7.43642	PBRM1;SMARCB1;AMBRA1	.
Chromatin Organization (GO:0006325)	7/323	0.0860665	0.410489	1.89804	4.65519	PBRM1;SUPT16H;SMARCB1;TADA2A;CARM1;EZH2;KDM6A	.
Protein-Containing Complex Assembly (GO:0065003)	7/323	0.0860665	0.410489	1.89804	4.65519	KLHL12;FANCC;SUGT1;KIFAP3;TEAD1;CX3CL1;TEAD2	.
Response to cAMP (GO:0051591)	2/42	0.0865338	0.410489	4.25129	10.4039	CRTC1;HCN1	.
Nuclear-Transcribed mRNA Catabolic Process (GO:0000956)	3/89	0.0865542	0.410489	2.97191	7.27222	CNOT10;PABPN1L;DIS3L2	.
Chromatin Remodeling (GO:0006338)	6/262	0.0881096	0.410489	2.00555	4.87183	PBRM1;RAD50;SMARCB1;TADA2A;CARM1;KDM6A	.
Mitotic Spindle Organization (GO:0007052)	3/90	0.0888029	0.410489	2.9376	7.11292	RCC1;CKAP5;LSM14A	.
Positive Regulation of Protein Metabolic Process (GO:0051247)	5/202	0.0891334	0.410489	2.16889	5.24355	ATG10;AGTR1;LDB2;ZNF268;ABCF1	.
Negative Regulation of Transcription by RNA Polymerase II (GO:0000122)	13/732	0.0896387	0.410489	1.55829	3.75855	ZBTB8A;THRB;PARP1;PRDM5;ZBTB10;NR2E1;LDB2;IL4;IMPACT;ZNF268;KAT14;NFE2L1;EZH2	.
Negative Regulation of Glial Cell Differentiation (GO:0045686)	1/8	0.0898703	0.410489	12.1147	29.1889	TTF2	.
Regulation of Epithelial Cell Apoptotic Process (GO:1904035)	1/8	0.0898703	0.410489	12.1147	29.1889	CARM1	.
R-loop Processing (GO:0062176)	1/8	0.0898703	0.410489	12.1147	29.1889	RAD50	.
T Cell Mediated Cytotoxicity (GO:0001913)	1/8	0.0898703	0.410489	12.1147	29.1889	THRB	.
Regulation of Morphogenesis of an Epithelium (GO:1905330)	1/8	0.0898703	0.410489	12.1147	29.1889	RNF207	.
Ammonium Transmembrane Transport (GO:0072488)	1/8	0.0898703	0.410489	12.1147	29.1889	RHBG	.
Regulation of Nervous System Process (GO:0031644)	1/8	0.0898703	0.410489	12.1147	29.1889	TMEM108	.
Phosphatidylethanolamine Biosynthetic Process (GO:0006646)	1/8	0.0898703	0.410489	12.1147	29.1889	ETNK2	.
Cellular Response to Epinephrine Stimulus (GO:0071872)	1/8	0.0898703	0.410489	12.1147	29.1889	PRKCA	.
Response to Thyroid Hormone (GO:0097066)	1/8	0.0898703	0.410489	12.1147	29.1889	THRB	.
Endochondral Ossification (GO:0001958)	1/8	0.0898703	0.410489	12.1147	29.1889	INPPL1	.
Endosome to Melanosome Transport (GO:0035646)	1/8	0.0898703	0.410489	12.1147	29.1889	BLOC1S5	.
Endosome to Pigment Granule Transport (GO:0043485)	1/8	0.0898703	0.410489	12.1147	29.1889	BLOC1S5	.
Synapse Pruning (GO:0098883)	1/8	0.0898703	0.410489	12.1147	29.1889	CX3CL1	.
Vascular Endothelial Cell Response to Laminar Fluid Shear Stress (GO:0097700)	1/8	0.0898703	0.410489	12.1147	29.1889	PRKCA	.
Integrin Activation (GO:0033622)	1/8	0.0898703	0.410489	12.1147	29.1889	CX3CL1	.
Positive Regulation of Vascular Associated Smooth Muscle Cell Migration (GO:1904754)	1/8	0.0898703	0.410489	12.1147	29.1889	DOCK7	.
Isoprenoid Biosynthetic Process (GO:0008299)	1/8	0.0898703	0.410489	12.1147	29.1889	MVD	.
Postsynaptic Density Organization (GO:0097106)	1/8	0.0898703	0.410489	12.1147	29.1889	TMEM108	.
Lipid Phosphorylation (GO:0046834)	1/8	0.0898703	0.410489	12.1147	29.1889	DGKG	.
Purine Nucleobase Metabolic Process (GO:0006144)	1/8	0.0898703	0.410489	12.1147	29.1889	SHMT1	.
Monoubiquitinated Protein Deubiquitination (GO:0035520)	1/8	0.0898703	0.410489	12.1147	29.1889	USP47	.
Regulation of Epithelial Cell Migration (GO:0010632)	2/43	0.0900802	0.410489	4.14739	9.983	IL4;DOCK1	.
RNA Transport (GO:0050658)	2/43	0.0900802	0.410489	4.14739	9.983	RBFOX1;CKAP5	.
Neural Crest Cell Development (GO:0014032)	2/43	0.0900802	0.410489	4.14739	9.983	CDH2;KLHL12	.
Positive Regulation of Myeloid Leukocyte Differentiation (GO:0002763)	2/43	0.0900802	0.410489	4.14739	9.983	PRKCA;EEIG1	.
Regulation of Double-Strand Break Repair (GO:2000779)	3/91	0.0910759	0.410489	2.90407	6.95834	PBRM1;RAD50;SMARCB1	.
Phosphatidylinositol Biosynthetic Process (GO:0006661)	3/91	0.0910759	0.410489	2.90407	6.95834	MTMR1;INPPL1;OCRL	.
Protein K48-linked Ubiquitination (GO:0070936)	3/91	0.0910759	0.410489	2.90407	6.95834	TTC3;UBE3A;FBXO45	.
Regulation of Osteoblast Differentiation (GO:0045667)	3/92	0.0933731	0.410489	2.8713	6.80828	PRKCA;RORB;SMAD5	.
Regulation of Monoatomic Cation Transmembrane Transport (GO:1904062)	2/44	0.0936689	0.410489	4.04844	9.58666	HOMER1;KCNIP1	.
Positive Regulation of Metabolic Process (GO:0009893)	4/147	0.0943184	0.410489	2.3865	5.63472	IL4;AGTR1;TTF2;KSR2	.
Regulation of Protein Metabolic Process (GO:0051246)	3/93	0.095694	0.410489	2.83925	6.66258	AGTR1;ELP2;ELP3	.
Positive Regulation of Cellular Component Biogenesis (GO:0044089)	3/93	0.095694	0.410489	2.83925	6.66258	SMPD3;PRKCA;CX3CL1	.
Regulation of Nervous System Development (GO:0051960)	2/45	0.0972983	0.410489	3.95409	9.21292	DOCK7;CX3CL1	.
Positive Regulation of Calcium Ion Transmembrane Transport (GO:1904427)	2/45	0.0972983	0.410489	3.95409	9.21292	TTF2;CX3CL1	.
Positive Regulation of Phosphorylation (GO:0042327)	3/94	0.0980385	0.410489	2.80791	6.52107	PDZD2;ZNF268;CAMKK2	.
Regulation of Complement-Dependent Cytotoxicity (GO:1903659)	1/9	0.100523	0.410489	10.5998	24.3516	IL4	.
Regulation of Dendritic Spine Maintenance (GO:1902950)	1/9	0.100523	0.410489	10.5998	24.3516	HOMER1	.
RISC Complex Assembly (GO:0070922)	1/9	0.100523	0.410489	10.5998	24.3516	AGO3	.
Regulation of Odontoblast Differentiation (GO:1901329)	1/9	0.100523	0.410489	10.5998	24.3516	NFE2L1	.
Nerve Growth Factor Signaling Pathway (GO:0038180)	1/9	0.100523	0.410489	10.5998	24.3516	KIDINS220	.
Regulation of Phospholipid Metabolic Process (GO:1903725)	1/9	0.100523	0.410489	10.5998	24.3516	MTMR1	.
Neuron Remodeling (GO:0016322)	1/9	0.100523	0.410489	10.5998	24.3516	CX3CL1	.
Nucleoside Metabolic Process (GO:0009116)	1/9	0.100523	0.410489	10.5998	24.3516	UPP2	.
Regulation of Sodium Ion Export Across Plasma Membrane (GO:1903276)	1/9	0.100523	0.410489	10.5998	24.3516	FXYD4	.
Regulation of Store-Operated Calcium Entry (GO:2001256)	1/9	0.100523	0.410489	10.5998	24.3516	HOMER1	.
Retinal Rod Cell Differentiation (GO:0060221)	1/9	0.100523	0.410489	10.5998	24.3516	RORB	.
Serine Family Amino Acid Catabolic Process (GO:0009071)	1/9	0.100523	0.410489	10.5998	24.3516	SHMT1	.
Positive Regulation of Neurotransmitter Secretion (GO:0001956)	1/9	0.100523	0.410489	10.5998	24.3516	SLC4A8	.
High-Density Lipoprotein Particle Assembly (GO:0034380)	1/9	0.100523	0.410489	10.5998	24.3516	PRKCA	.
Positive Regulation of Purine Nucleotide Biosynthetic Process (GO:1900373)	1/9	0.100523	0.410489	10.5998	24.3516	IL4	.
Positive Regulation of Sodium Ion Export Across Plasma Membrane (GO:1903278)	1/9	0.100523	0.410489	10.5998	24.3516	FXYD4	.
Positive Regulation of Transcription of Nucleolar Large rRNA by RNA Polymerase I (GO:1901838)	1/9	0.100523	0.410489	10.5998	24.3516	SMARCB1	.
Isoprenoid Metabolic Process (GO:0006720)	1/9	0.100523	0.410489	10.5998	24.3516	MVD	.
Mitochondrial Protein Catabolic Process (GO:0035694)	1/9	0.100523	0.410489	10.5998	24.3516	PRKCA	.
Mitotic Nuclear Membrane Organization (GO:0101024)	1/9	0.100523	0.410489	10.5998	24.3516	RCC1	.
Mitotic Nuclear Membrane Reassembly (GO:0007084)	1/9	0.100523	0.410489	10.5998	24.3516	RCC1	.
Modification-Dependent Macromolecule Catabolic Process (GO:0043632)	1/9	0.100523	0.410489	10.5998	24.3516	UBC	.
Myeloid Dendritic Cell Differentiation (GO:0043011)	1/9	0.100523	0.410489	10.5998	24.3516	IL4	.
Regulation of Osteoclast Differentiation (GO:0045670)	2/46	0.100967	0.410489	3.86403	8.86006	IL4;EEIG1	.
Central Nervous System Neuron Differentiation (GO:0021953)	2/46	0.100967	0.410489	3.86403	8.86006	SPOCK1;RORB	.
Positive Regulation of Transcription Elongation by RNA Polymerase II (GO:0032968)	2/46	0.100967	0.410489	3.86403	8.86006	LDB2;MED17	.
Mononuclear Cell Differentiation (GO:1903131)	2/46	0.100967	0.410489	3.86403	8.86006	IL4;PARP1	.
Regulation of Cell-Substrate Adhesion (GO:0010810)	2/46	0.100967	0.410489	3.86403	8.86006	SPOCK1;CX3CL1	.
Sodium Ion Transport (GO:0006814)	3/96	0.102797	0.410489	2.74724	6.24998	SLC4A8;SCN4B;HCN1	.
Regulation of Actin Filament-Based Process (GO:0032970)	3/96	0.102797	0.410489	2.74724	6.24998	EPHA5;DVL2;EFNA5	.
BMP Signaling Pathway (GO:0030509)	2/47	0.104674	0.410489	3.77797	8.52652	SMAD5;GDF7	.
Cardiac Conduction (GO:0061337)	2/47	0.104674	0.410489	3.77797	8.52652	SCN4B;HCN1	.
Chromosome Organization (GO:0051276)	2/47	0.104674	0.410489	3.77797	8.52652	NUP133;LDB2	.
Proteasome-Mediated Ubiquitin-Dependent Protein Catabolic Process (GO:0043161)	7/340	0.10537	0.410489	1.79957	4.04952	APPBP2;CUL2;UBE3A;FBXO45;KLHL12;AMBRA1;FBXO11	.
Positive Regulation of Hydrolase Activity (GO:0051345)	3/98	0.107645	0.410489	2.68913	5.99386	PDZD2;RGS7;EZH2	.
rRNA Metabolic Process (GO:0016072)	3/98	0.107645	0.410489	2.68913	5.99386	GTF3C1;DDX54;MRM2	.
Negative Regulation of Tumor Necrosis Factor Production (GO:0032720)	2/48	0.108417	0.410489	3.69565	8.21089	IL4;CX3CL1	.
Blood Circulation (GO:0008015)	2/48	0.108417	0.410489	3.69565	8.21089	SGCD;AGTR1	.
Nuclear Receptor-Mediated Steroid Hormone Signaling Pathway (GO:0030518)	2/48	0.108417	0.410489	3.69565	8.21089	DDX54;UBE3A	.
Post-Translational Protein Modification (GO:0043687)	2/48	0.108417	0.410489	3.69565	8.21089	PARP1;STT3B	.
Mitotic G2/M Transition Checkpoint (GO:0044818)	2/48	0.108417	0.410489	3.69565	8.21089	RAD50;INTS3	.
Positive Regulation of Autophagy (GO:0010508)	3/99	0.110102	0.410489	2.66098	5.87106	IL4;CDK16;CAMKK2	.
Golgi to Lysosome Transport (GO:0090160)	1/10	0.111052	0.410489	9.42155	20.7063	CCDC91	.
L-serine Metabolic Process (GO:0006563)	1/10	0.111052	0.410489	9.42155	20.7063	SHMT1	.
Regulation of Mesenchymal Stem Cell Differentiation (GO:2000739)	1/10	0.111052	0.410489	9.42155	20.7063	SOX5	.
Angiotensin-Activated Signaling Pathway (GO:0038166)	1/10	0.111052	0.410489	9.42155	20.7063	AGTR1	.
Basement Membrane Organization (GO:0071711)	1/10	0.111052	0.410489	9.42155	20.7063	HMCN1	.
Nuclear Membrane Disassembly (GO:0051081)	1/10	0.111052	0.410489	9.42155	20.7063	PRKCA	.
One-Carbon Metabolic Process (GO:0006730)	1/10	0.111052	0.410489	9.42155	20.7063	SHMT1	.
Cell Proliferation in Forebrain (GO:0021846)	1/10	0.111052	0.410489	9.42155	20.7063	DOCK7	.
Regulation of Telomere Capping (GO:1904353)	1/10	0.111052	0.410489	9.42155	20.7063	RAD50	.
Cytolysis by Host of Symbiont Cells (GO:0051838)	1/10	0.111052	0.410489	9.42155	20.7063	TTF2	.
Serine Family Amino Acid Metabolic Process (GO:0009069)	1/10	0.111052	0.410489	9.42155	20.7063	SHMT1	.
Desmosome Organization (GO:0002934)	1/10	0.111052	0.410489	9.42155	20.7063	PRKCA	.
Detection of Stimulus Involved in Sensory Perception of Pain (GO:0062149)	1/10	0.111052	0.410489	9.42155	20.7063	SCRN3	.
Positive Regulation of Chondrocyte Differentiation (GO:0032332)	1/10	0.111052	0.410489	9.42155	20.7063	SOX5	.
Synaptic Signaling (GO:0099536)	1/10	0.111052	0.410489	9.42155	20.7063	DTNB	.
Positive Regulation of Hemostasis (GO:1900048)	1/10	0.111052	0.410489	9.42155	20.7063	TTF2	.
Erythrose 4-Phosphate/Phosphoenolpyruvate Family Amino Acid Catabolic Process (GO:1902222)	1/10	0.111052	0.410489	9.42155	20.7063	GSTZ1	.
Positive Regulation of Interleukin-13 Production (GO:0032736)	1/10	0.111052	0.410489	9.42155	20.7063	IL4	.
Telomere Maintenance via Recombination (GO:0000722)	1/10	0.111052	0.410489	9.42155	20.7063	RAD50	.
Tetrahydrofolate Metabolic Process (GO:0046653)	1/10	0.111052	0.410489	9.42155	20.7063	SHMT1	.
Type B Pancreatic Cell Differentiation (GO:0003309)	1/10	0.111052	0.410489	9.42155	20.7063	CDH2	.
Positive Regulation of Neuroblast Proliferation (GO:0002052)	1/10	0.111052	0.410489	9.42155	20.7063	CX3CL1	.
Glutamine Family Amino Acid Biosynthetic Process (GO:0009084)	1/10	0.111052	0.410489	9.42155	20.7063	PYCR2	.
Homologous Recombination (GO:0035825)	1/10	0.111052	0.410489	9.42155	20.7063	RAD50	.
Kinetochore Assembly (GO:0051382)	1/10	0.111052	0.410489	9.42155	20.7063	SUGT1	.
Protein K11-linked Deubiquitination (GO:0035871)	1/10	0.111052	0.410489	9.42155	20.7063	USP30	.
Regulation of T-helper 2 Cell Cytokine Production (GO:2000551)	1/10	0.111052	0.410489	9.42155	20.7063	IL4	.
Regulation of Ceramide Biosynthetic Process (GO:2000303)	1/10	0.111052	0.410489	9.42155	20.7063	SAMD8	.
Negative Regulation of TORC1 Signaling (GO:1904262)	2/49	0.112196	0.412812	3.61684	7.91188	UBE3A;PRKCA	.
Regulation of Small GTPase Mediated Signal Transduction (GO:0051056)	4/157	0.112816	0.412812	2.22938	4.86451	ARHGAP10;ARHGAP20;DOCK7;ARHGAP5	.
Regulation of Phosphatidylinositol 3-Kinase/Protein Kinase B Signal Transduction (GO:0051896)	5/219	0.115017	0.412812	1.99486	4.31423	PRKCA;AMBRA1;EFNA5;PTPN13;CX3CL1	.
Negative Regulation of Tumor Necrosis Factor Superfamily Cytokine Production (GO:1903556)	2/50	0.116008	0.412812	3.54131	7.62832	IL4;CX3CL1	.
Positive Regulation of Non-Canonical NF-kappaB Signal Transduction (GO:1901224)	2/50	0.116008	0.412812	3.54131	7.62832	RTKN2;ZNF268	.
Negative Regulation of ERK1 and ERK2 Cascade (GO:0070373)	2/50	0.116008	0.412812	3.54131	7.62832	PDZD2;SYNJ2BP	.
Regulation of Cellular Component Organization (GO:0051128)	4/159	0.116695	0.412812	2.20039	4.72686	RAB4A;PRDM5;AGTR1;SPOCK1	.
Regulation of Cell Population Proliferation (GO:0042127)	13/769	0.118441	0.412812	1.47915	3.15553	PBRM1;AMBN;RTKN2;CX3CL1;IL4;ZNF609;AGO3;AGTR1;DVL2;MVD;ZNF268;EZH2;DIS3L2	.
Regulation of Mitotic Metaphase/Anaphase Transition (GO:0030071)	2/51	0.119853	0.412812	3.46886	7.35916	PBRM1;SMARCB1	.
Cardiac Muscle Tissue Development (GO:0048738)	2/51	0.119853	0.412812	3.46886	7.35916	SGCD;SMAD5	.
Ribosome Biogenesis (GO:0042254)	4/161	0.120633	0.412812	2.17214	4.59408	MPHOSPH10;DDX54;MRM2;ABCF1	.
Negative Regulation of Extracellular Matrix Organization (GO:1903054)	1/11	0.121457	0.412812	8.47897	17.8753	CHADL	.
Negative Regulation of Fibrinolysis (GO:0051918)	1/11	0.121457	0.412812	8.47897	17.8753	TTF2	.
Negative Regulation of Sprouting Angiogenesis (GO:1903671)	1/11	0.121457	0.412812	8.47897	17.8753	SYNJ2BP	.
Carnitine Metabolic Process (GO:0009437)	1/11	0.121457	0.412812	8.47897	17.8753	SHMT1	.
Positive Regulation of MHC Class II Biosynthetic Process (GO:0045348)	1/11	0.121457	0.412812	8.47897	17.8753	IL4	.
Positive Regulation of Bone Resorption (GO:0045780)	1/11	0.121457	0.412812	8.47897	17.8753	PRKCA	.
Dosage Compensation by Inactivation of X Chromosome (GO:0009048)	1/11	0.121457	0.412812	8.47897	17.8753	RLIM	.
tRNA Transcription (GO:0009304)	1/11	0.121457	0.412812	8.47897	17.8753	GTF3C1	.
Positive Regulation of Macrophage Differentiation (GO:0045651)	1/11	0.121457	0.412812	8.47897	17.8753	PRKCA	.
Folic Acid Metabolic Process (GO:0046655)	1/11	0.121457	0.412812	8.47897	17.8753	SHMT1	.
Positive Regulation of Neuron Migration (GO:2001224)	1/11	0.121457	0.412812	8.47897	17.8753	ZNF609	.
Kinetochore Organization (GO:0051383)	1/11	0.121457	0.412812	8.47897	17.8753	SUGT1	.
Progesterone Receptor Signaling Pathway (GO:0050847)	1/11	0.121457	0.412812	8.47897	17.8753	UBE3A	.
mRNA Methylguanosine-Cap Decapping (GO:0110156)	1/11	0.121457	0.412812	8.47897	17.8753	EDC3	.
Regulation of Adipose Tissue Development (GO:1904177)	1/11	0.121457	0.412812	8.47897	17.8753	PARP1	.
DNA Damage Response (GO:0006974)	8/421	0.122236	0.412812	1.65875	3.48636	USP47;RAD50;PARP1;NEK4;INTS3;FBXO45;FANCC;TTF2	.
+ Reg of Phosphatidylinositol 3-Kinase/Prot Kinase B Signal Transduction (GO:0051897)	4/162	0.122623	0.412812	2.15828	4.52946	PRKCA;AMBRA1;EFNA5;CX3CL1	.
Macroautophagy (GO:0016236)	4/162	0.122623	0.412812	2.15828	4.52946	LRBA;ATG10;USP30;AMBRA1	.
Regulation of Substrate Adhesion-Dependent Cell Spreading (GO:1900024)	2/52	0.123729	0.412812	3.39931	7.10341	EFNA5;DOCK1	.
Regulation of Synaptic Transmission, Glutamatergic (GO:0051966)	2/52	0.123729	0.412812	3.39931	7.10341	HOMER1;HCN1	.
Positive Regulation of Reactive Oxygen Species Metabolic Process (GO:2000379)	2/52	0.123729	0.412812	3.39931	7.10341	AGTR1;TTF2	.
Regulation of Cell Development (GO:0060284)	2/52	0.123729	0.412812	3.39931	7.10341	DOCK7;CX3CL1	.
Positive Regulation of Response to External Stimulus (GO:0032103)	4/163	0.124627	0.412812	2.1446	4.46597	AGTR1;PRKCA;TTF2;CX3CL1	.
B Cell Differentiation (GO:0030183)	2/53	0.127635	0.412812	3.33249	6.86019	IL4;PIK3R3	.
Regulation of Focal Adhesion Assembly (GO:0051893)	2/53	0.127635	0.412812	3.33249	6.86019	LDB2;EFNA5	.
Regulation of Release of Sequestered Calcium Ion Into Cytosol (GO:0051279)	2/53	0.127635	0.412812	3.33249	6.86019	TTF2;CX3CL1	.
Cellular Response to BMP Stimulus (GO:0071773)	2/54	0.13157	0.412812	3.26824	6.62869	SMAD5;GDF7	.
DNA Strand Elongation (GO:0022616)	1/12	0.131742	0.412812	7.70776	15.6229	RAD50	.
Negative Regulation of Hemostasis (GO:1900047)	1/12	0.131742	0.412812	7.70776	15.6229	TTF2	.
Negative Regulation of Locomotion (GO:0040013)	1/12	0.131742	0.412812	7.70776	15.6229	PDZD2	.
Negative Regulation of Substrate Adhesion-Dependent Cell Spreading (GO:1900025)	1/12	0.131742	0.412812	7.70776	15.6229	EFNA5	.
Regulation of Transferase Activity (GO:0051338)	1/12	0.131742	0.412812	7.70776	15.6229	LDB2	.
Cellular Response to Angiotensin (GO:1904385)	1/12	0.131742	0.412812	7.70776	15.6229	AGTR1	.
Cellular Response to Cholesterol (GO:0071397)	1/12	0.131742	0.412812	7.70776	15.6229	NFE2L1	.
Regulation of Tube Diameter (GO:0035296)	1/12	0.131742	0.412812	7.70776	15.6229	AGTR1	.
Phospholipid Efflux (GO:0033700)	1/12	0.131742	0.412812	7.70776	15.6229	ABCA12	.
Positive Regulation of Cholesterol Biosynthetic Process (GO:0045542)	1/12	0.131742	0.412812	7.70776	15.6229	PRKCA	.
Endochondral Bone Morphogenesis (GO:0060350)	1/12	0.131742	0.412812	7.70776	15.6229	INPPL1	.
Termination of RNA Polymerase II Transcription (GO:0006369)	1/12	0.131742	0.412812	7.70776	15.6229	TTF2	.
Fibrinolysis (GO:0042730)	1/12	0.131742	0.412812	7.70776	15.6229	TTF2	.
Vascular Endothelial Cell Response to Fluid Shear Stress (GO:0097699)	1/12	0.131742	0.412812	7.70776	15.6229	PRKCA	.
Vascular Process in Circulatory System (GO:0003018)	1/12	0.131742	0.412812	7.70776	15.6229	AGTR1	.
Glycerolipid Metabolic Process (GO:0046486)	1/12	0.131742	0.412812	7.70776	15.6229	DGKG	.
Positive Regulation of Sterol Biosynthetic Process (GO:0106120)	1/12	0.131742	0.412812	7.70776	15.6229	PRKCA	.
Intestinal Absorption (GO:0050892)	1/12	0.131742	0.412812	7.70776	15.6229	HEPH	.
Potassium Ion Export Across Plasma Membrane (GO:0097623)	1/12	0.131742	0.412812	7.70776	15.6229	KCNIP1	.
Primary miRNA Processing (GO:0031053)	1/12	0.131742	0.412812	7.70776	15.6229	DROSHA	.
Low-Density Lipoprotein Particle Remodeling (GO:0034374)	1/12	0.131742	0.412812	7.70776	15.6229	AGTR1	.
Proteinogenic Amino Acid Metabolic Process (GO:0170039)	1/12	0.131742	0.412812	7.70776	15.6229	SHMT1	.
Pyrimidine Deoxyribonucleotide Catabolic Process (GO:0009223)	1/12	0.131742	0.412812	7.70776	15.6229	UPP2	.
Mitochondrial Genome Maintenance (GO:0000002)	1/12	0.131742	0.412812	7.70776	15.6229	PARP1	.
Regulation of Adenylate Cyclase-Activating G Protein-Coupled Receptor Signaling Pathway (GO:0106070)	1/12	0.131742	0.412812	7.70776	15.6229	PRKCA	.
Regulation of Astrocyte Differentiation (GO:0048710)	1/12	0.131742	0.412812	7.70776	15.6229	TTF2	.
Negative Regulation of DNA-templated Transcription (GO:0045892)	16/1006	0.132408	0.412812	1.39197	2.81439	ZBTB8A;THRB;PARP1;PRDM5;ZBTB10;RORB;NR2E1;LDB2;IL4;IMPACT;PSPC1;RLIM;ZNF268;KAT14;NFE2L1;EZH2	.
Regulation of Cytokine Production Involved in Inflammatory Response (GO:1900015)	2/55	0.135533	0.412812	3.20641	6.40814	PRKCA;TTF2	.
Rho Protein Signal Transduction (GO:0007266)	2/55	0.135533	0.412812	3.20641	6.40814	AGTR1;ARHGAP5	.
Nucleus Organization (GO:0006997)	2/55	0.135533	0.412812	3.20641	6.40814	NUP133;WDR73	.
rRNA Processing (GO:0006364)	3/110	0.13848	0.412812	2.38609	4.71738	MPHOSPH10;DDX54;MRM2	.
Regulation of Protein Localization to Nucleus (GO:1900180)	2/56	0.139522	0.412812	3.14687	6.19787	PDZD2;TTF2	.
Positive Regulation of Protein Phosphorylation (GO:0001934)	4/171	0.141149	0.412812	2.04103	3.99621	PDZD2;EFNA5;ZNF268;CAMKK2	.
Positive Regulation of T Cell Activation (GO:0050870)	3/111	0.141173	0.412812	2.36388	4.62792	IL4;PBRM1;SMARCB1	.
Regulation of G1/S Transition of Mitotic Cell Cycle (GO:2000045)	3/111	0.141173	0.412812	2.36388	4.62792	PBRM1;SMARCB1;AMBRA1	.
L-amino Acid Catabolic Process (GO:0170035)	1/13	0.141907	0.412812	7.06509	13.7952	SHMT1	.
Regulation of Homotypic Cell-Cell Adhesion (GO:0034110)	1/13	0.141907	0.412812	7.06509	13.7952	PRKCA	.
Regulation of Neuron Projection Arborization (GO:0150011)	1/13	0.141907	0.412812	7.06509	13.7952	DVL2	.
Neuronal Action Potential (GO:0019228)	1/13	0.141907	0.412812	7.06509	13.7952	SCN4B	.
Regulation of Retinoic Acid Receptor Signaling Pathway (GO:0048385)	1/13	0.141907	0.412812	7.06509	13.7952	EZH2	.
Regulation of Transcription of Nucleolar Large rRNA by RNA Polymerase I (GO:1901836)	1/13	0.141907	0.412812	7.06509	13.7952	SMARCB1	.
Regulation of Vascular Associated Smooth Muscle Cell Migration (GO:1904752)	1/13	0.141907	0.412812	7.06509	13.7952	DOCK7	.
Cellular Response to Interleukin-4 (GO:0071353)	1/13	0.141907	0.412812	7.06509	13.7952	IL4	.
Response to Nerve Growth Factor (GO:1990089)	1/13	0.141907	0.412812	7.06509	13.7952	KIDINS220	.
Response to Progesterone (GO:0032570)	1/13	0.141907	0.412812	7.06509	13.7952	UBE3A	.
Positive Regulation of Cellular Respiration (GO:1901857)	1/13	0.141907	0.412812	7.06509	13.7952	IL4	.
Positive Regulation of Coagulation (GO:0050820)	1/13	0.141907	0.412812	7.06509	13.7952	TTF2	.
Positive Regulation of Sodium Ion Transport (GO:0010765)	1/13	0.141907	0.412812	7.06509	13.7952	SCN4B	.
Positive Regulation of Type 2 Immune Response (GO:0002830)	1/13	0.141907	0.412812	7.06509	13.7952	IL4	.
Intraciliary Retrograde Transport (GO:0035721)	1/13	0.141907	0.412812	7.06509	13.7952	IFT140	.
Protein Heterotetramerization (GO:0051290)	1/13	0.141907	0.412812	7.06509	13.7952	FARSB	.
Mitochondrial DNA Metabolic Process (GO:0032042)	1/13	0.141907	0.412812	7.06509	13.7952	PARP1	.
Myeloid Dendritic Cell Activation (GO:0001773)	1/13	0.141907	0.412812	7.06509	13.7952	IL4	.
Negative Regulation of Cell Activation (GO:0050866)	1/13	0.141907	0.412812	7.06509	13.7952	TTF2	.
Regulation of Intracellular Signal Transduction (GO:1902531)	6/302	0.144157	0.412812	1.73097	3.35264	TBCK;ARHGAP10;ARHGAP20;ARHGAP5;PTPN13;MOB3B	.
Proteasomal Protein Catabolic Process (GO:0010498)	7/372	0.147431	0.412812	1.63909	3.13787	APPBP2;UBE3A;FBXO45;KLHL12;STT3B;AMBRA1;FBXO11	.
Regulation of Mitotic Nuclear Division (GO:0007088)	2/58	0.147575	0.412812	3.03417	5.80566	PDZD2;RCC1	.
Regulation of Multicellular Organismal Development (GO:2000026)	2/58	0.147575	0.412812	3.03417	5.80566	TADA2A;KAT14	.
Regulation of Myoblast Differentiation (GO:0045661)	2/58	0.147575	0.412812	3.03417	5.80566	PBRM1;SMARCB1	.
Intracellular Iron Ion Homeostasis (GO:0006879)	2/58	0.147575	0.412812	3.03417	5.80566	MECR;SMAD5	.
Protein Homotetramerization (GO:0051289)	2/59	0.151636	0.412812	2.98079	5.62258	SHMT1;HCN1	.
Protein Polymerization (GO:0051258)	2/59	0.151636	0.412812	2.98079	5.62258	PDZD2;CKAP5	.
Microtubule Cytoskeleton Organization Involved in Mitosis (GO:1902850)	2/59	0.151636	0.412812	2.98079	5.62258	RCC1;CKAP5	.
Regulation of Neuron Projection Development (GO:0010975)	4/176	0.151896	0.412812	1.98119	3.73368	SIPA1L1;KIDINS220;SPOCK1;CX3CL1	.
Negative Regulation of Coagulation (GO:0050819)	1/14	0.151953	0.412812	6.52129	12.2873	TTF2	.
Regulation of Coagulation (GO:0050818)	1/14	0.151953	0.412812	6.52129	12.2873	TTF2	.
Regulation of Dephosphorylation (GO:0035303)	1/14	0.151953	0.412812	6.52129	12.2873	MTMR1	.
Negative Regulation of Epithelial Cell Migration (GO:0010633)	1/14	0.151953	0.412812	6.52129	12.2873	IL4	.
G Protein-Coupled Glutamate Receptor Signaling Pathway (GO:0007216)	1/14	0.151953	0.412812	6.52129	12.2873	HOMER1	.
L-amino Acid Metabolic Process (GO:0170033)	1/14	0.151953	0.412812	6.52129	12.2873	SHMT1	.
Regulation of Macromolecule Metabolic Process (GO:0060255)	1/14	0.151953	0.412812	6.52129	12.2873	MTMR1	.
Negative Regulation of Transcription Elongation by RNA Polymerase II (GO:0034244)	1/14	0.151953	0.412812	6.52129	12.2873	PARP1	.
Neuron Cell-Cell Adhesion (GO:0007158)	1/14	0.151953	0.412812	6.52129	12.2873	NINJ2	.
Nuclear Pore Organization (GO:0006999)	1/14	0.151953	0.412812	6.52129	12.2873	NUP133	.
Calcium-Ion Regulated Exocytosis (GO:0017156)	1/14	0.151953	0.412812	6.52129	12.2873	NLRP5	.
Cell Communication by Electrical Coupling Involved in Cardiac Conduction (GO:0086064)	1/14	0.151953	0.412812	6.52129	12.2873	PRKCA	.
Response to Muscle Stretch (GO:0035994)	1/14	0.151953	0.412812	6.52129	12.2873	CDH2	.
Retinoic Acid Receptor Signaling Pathway (GO:0048384)	1/14	0.151953	0.412812	6.52129	12.2873	THRB	.
Positive Regulation of Exosomal Secretion (GO:1903543)	1/14	0.151953	0.412812	6.52129	12.2873	SMPD3	.
Telomere Capping (GO:0016233)	1/14	0.151953	0.412812	6.52129	12.2873	RAD50	.
Positive Regulation of Isotype Switching (GO:0045830)	1/14	0.151953	0.412812	6.52129	12.2873	IL4	.
Establishment of Spindle Localization (GO:0051293)	1/14	0.151953	0.412812	6.52129	12.2873	NLRP5	.
Eye Photoreceptor Cell Differentiation (GO:0001754)	1/14	0.151953	0.412812	6.52129	12.2873	RORB	.
Positive Regulation of Sodium Ion Transmembrane Transport (GO:1902307)	1/14	0.151953	0.412812	6.52129	12.2873	FXYD4	.
Intracellular Potassium Ion Homeostasis (GO:0030007)	1/14	0.151953	0.412812	6.52129	12.2873	PRKCA	.
Protein Homotrimerization (GO:0070207)	1/14	0.151953	0.412812	6.52129	12.2873	SIGMAR1	.
miRNA Metabolic Process (GO:0010586)	1/14	0.151953	0.412812	6.52129	12.2873	DIS3L2	.
Regulation of Actin Filament Organization (GO:0110053)	1/14	0.151953	0.412812	6.52129	12.2873	INPPL1	.
Negative Regulation of ATP Metabolic Process (GO:1903579)	1/14	0.151953	0.412812	6.52129	12.2873	PARP1	.
Negative Regulation of cGAS/STING Signaling Pathway (GO:0160049)	1/14	0.151953	0.412812	6.52129	12.2873	PARP1	.
Negative Regulation of Cartilage Development (GO:0061037)	1/14	0.151953	0.412812	6.52129	12.2873	CHADL	.
Positive Regulation of Cell Projection Organization (GO:0031346)	3/115	0.152121	0.412812	2.27899	4.29151	KIDINS220;DVL2;CX3CL1	.
Post-Transcriptional Regulation of Gene Expression (GO:0010608)	2/60	0.15572	0.413111	2.92925	5.44752	ELP2;ELP3	.
Regulation of SMAD Protein Signal Transduction (GO:0060390)	2/60	0.15572	0.413111	2.92925	5.44752	PDZD2;GDF7	.
Regulation of Reactive Oxygen Species Metabolic Process (GO:2000377)	2/61	0.159824	0.413111	2.87946	5.28001	AGTR1;TTF2	.
Phospholipid Transport (GO:0015914)	2/61	0.159824	0.413111	2.87946	5.28001	PRELID2;ABCA12	.
Telomere Organization (GO:0032200)	2/61	0.159824	0.413111	2.87946	5.28001	RAD50;PARP1	.
post-Golgi Vesicle-Mediated Transport (GO:0006892)	2/61	0.159824	0.413111	2.87946	5.28001	VPS13C;SCAMP1	.
Negative Regulation of Chondrocyte Differentiation (GO:0032331)	1/15	0.161882	0.413111	6.05518	11.0258	CHADL	.
Golgi to Endosome Transport (GO:0006895)	1/15	0.161882	0.413111	6.05518	11.0258	VPS13C	.
Negative Regulation of Macrophage Activation (GO:0043031)	1/15	0.161882	0.413111	6.05518	11.0258	CX3CL1	.
Regulation of Interleukin-13 Production (GO:0032656)	1/15	0.161882	0.413111	6.05518	11.0258	IL4	.
Regulation of Isotype Switching (GO:0045191)	1/15	0.161882	0.413111	6.05518	11.0258	IL4	.
Regulation of Microglial Cell Activation (GO:1903978)	1/15	0.161882	0.413111	6.05518	11.0258	CX3CL1	.
Regulation of Neuroblast Proliferation (GO:1902692)	1/15	0.161882	0.413111	6.05518	11.0258	CX3CL1	.
Regulation of Phosphate Metabolic Process (GO:0019220)	1/15	0.161882	0.413111	6.05518	11.0258	IL4	.
Autophagy of Peroxisome (GO:0030242)	1/15	0.161882	0.413111	6.05518	11.0258	USP30	.
Cardiac Myofibril Assembly (GO:0055003)	1/15	0.161882	0.413111	6.05518	11.0258	NEBL	.
Regulation of Systemic Arterial Blood Pressure by Hormone (GO:0001990)	1/15	0.161882	0.413111	6.05518	11.0258	AGTR1	.
Pexophagy (GO:0000425)	1/15	0.161882	0.413111	6.05518	11.0258	USP30	.
Pigment Granule Transport (GO:0051904)	1/15	0.161882	0.413111	6.05518	11.0258	BLOC1S5	.
Renal Water Homeostasis (GO:0003091)	1/15	0.161882	0.413111	6.05518	11.0258	PRKCA	.
Centromere Complex Assembly (GO:0034508)	1/15	0.161882	0.413111	6.05518	11.0258	SUGT1	.
Positive Regulation of Autophagy of Mitochondrion (GO:1903599)	1/15	0.161882	0.413111	6.05518	11.0258	CAMKK2	.
Folic Acid-Containing Compound Metabolic Process (GO:0006760)	1/15	0.161882	0.413111	6.05518	11.0258	SHMT1	.
Positive Regulation of Regulated Secretory Pathway (GO:1903307)	1/15	0.161882	0.413111	6.05518	11.0258	SLC4A8	.
Melanosome Transport (GO:0032402)	1/15	0.161882	0.413111	6.05518	11.0258	BLOC1S5	.
Protein Trimerization (GO:0070206)	1/15	0.161882	0.413111	6.05518	11.0258	SIGMAR1	.
Proteinogenic Amino Acid Catabolic Process (GO:0170040)	1/15	0.161882	0.413111	6.05518	11.0258	SHMT1	.
Mitotic Recombination (GO:0006312)	1/15	0.161882	0.413111	6.05518	11.0258	RAD50	.
Regulation of MHC Class II Biosynthetic Process (GO:0045346)	1/15	0.161882	0.413111	6.05518	11.0258	IL4	.
Multicellular Organismal-Level Iron Ion Homeostasis (GO:0060586)	1/15	0.161882	0.413111	6.05518	11.0258	HEPH	.
Regulation of Amyloid-Beta Clearance (GO:1900221)	1/15	0.161882	0.413111	6.05518	11.0258	IL4	.
DNA-templated Transcription Initiation (GO:0006352)	2/62	0.163948	0.41758	2.83132	5.11961	GTF3C1;MED17	.
RNA Metabolic Process (GO:0016070)	2/63	0.168091	0.4179	2.78477	4.96593	RNASEH2B;DDX54	.
DNA Double-Strand Break Processing (GO:0000729)	1/16	0.171695	0.4179	5.65122	9.95763	RAD50	.
Regulation of Fibrinolysis (GO:0051917)	1/16	0.171695	0.4179	5.65122	9.95763	TTF2	.
Golgi to Vacuole Transport (GO:0006896)	1/16	0.171695	0.4179	5.65122	9.95763	CCDC91	.
Negative Regulation of Platelet Activation (GO:0010544)	1/16	0.171695	0.4179	5.65122	9.95763	TTF2	.
Regulation of Macrophage Differentiation (GO:0045649)	1/16	0.171695	0.4179	5.65122	9.95763	PRKCA	.
Negative Regulation of Synaptic Transmission (GO:0050805)	1/16	0.171695	0.4179	5.65122	9.95763	HCN1	.
Anterograde Synaptic Vesicle Transport (GO:0048490)	1/16	0.171695	0.4179	5.65122	9.95763	BLOC1S5	.
Neurotrophin Signaling Pathway (GO:0038179)	1/16	0.171695	0.4179	5.65122	9.95763	KIDINS220	.
Peptide Catabolic Process (GO:0043171)	1/16	0.171695	0.4179	5.65122	9.95763	NPEPPS	.
Regulation of Stem Cell Proliferation (GO:0072091)	1/16	0.171695	0.4179	5.65122	9.95763	AGO3	.
Cellular Response to Laminar Fluid Shear Stress (GO:0071499)	1/16	0.171695	0.4179	5.65122	9.95763	PRKCA	.
Retrograde Axonal Transport (GO:0008090)	1/16	0.171695	0.4179	5.65122	9.95763	TMEM108	.
Positive Regulation of Collagen Biosynthetic Process (GO:0032967)	1/16	0.171695	0.4179	5.65122	9.95763	TTF2	.
Synaptic Vesicle Transport Along Microtubule (GO:0099517)	1/16	0.171695	0.4179	5.65122	9.95763	BLOC1S5	.
Establishment of Melanosome Localization (GO:0032401)	1/16	0.171695	0.4179	5.65122	9.95763	BLOC1S5	.
Heart Process (GO:0003015)	1/16	0.171695	0.4179	5.65122	9.95763	SGCD	.
Membrane Depolarization During Cardiac Muscle Cell Action Potential (GO:0086012)	1/16	0.171695	0.4179	5.65122	9.95763	SCN4B	.
Microtubule Depolymerization (GO:0007019)	1/16	0.171695	0.4179	5.65122	9.95763	CKAP5	.
Mitochondrial Ribosome Assembly (GO:0061668)	1/16	0.171695	0.4179	5.65122	9.95763	MRM2	.
Negative Regulation of Amyloid-Beta Formation (GO:1902430)	1/16	0.171695	0.4179	5.65122	9.95763	PDZD2	.
G1/S Transition of Mitotic Cell Cycle (GO:0000082)	2/64	0.172252	0.4179	2.73971	4.81859	CUL2;RCC1	.
Regulation of Synapse Assembly (GO:0051963)	2/64	0.172252	0.4179	2.73971	4.81859	CLSTN2;DOCK1	.
Epigenetic Regulation of Gene Expression (GO:0040029)	2/64	0.172252	0.4179	2.73971	4.81859	TASOR;EZH2	.
Regulation of Phosphorylation (GO:0042325)	2/65	0.17643	0.4179	2.69609	4.67726	IL4;LDB2	.
Regulation of Neurogenesis (GO:0050767)	2/66	0.180624	0.4179	2.65383	4.5416	DOCK7;CX3CL1	.
Cell Cycle G1/S Phase Transition (GO:0044843)	2/66	0.180624	0.4179	2.65383	4.5416	CUL2;RCC1	.
Cell-Cell Junction Organization (GO:0045216)	2/66	0.180624	0.4179	2.65383	4.5416	CDH2;DSG1	.
Positive Regulation of MAP Kinase Activity (GO:0043406)	2/66	0.180624	0.4179	2.65383	4.5416	DVL2;EZH2	.
DNA Modification (GO:0006304)	1/17	0.181394	0.4179	5.29775	9.04369	PARP1	.
acetyl-CoA Metabolic Process (GO:0006084)	1/17	0.181394	0.4179	5.29775	9.04369	MVD	.
Aromatic Amino Acid Family Catabolic Process (GO:0009074)	1/17	0.181394	0.4179	5.29775	9.04369	GSTZ1	.
Regulation of Sodium Ion Transmembrane Transporter Activity (GO:2000649)	1/17	0.181394	0.4179	5.29775	9.04369	SCN4B	.
Regulation of Ventricular Cardiac Muscle Cell Membrane Repolarization (GO:0060307)	1/17	0.181394	0.4179	5.29775	9.04369	SCN4B	.
Polyol Metabolic Process (GO:0019751)	1/17	0.181394	0.4179	5.29775	9.04369	OCRL	.
Positive Chemotaxis (GO:0050918)	1/17	0.181394	0.4179	5.29775	9.04369	CX3CL1	.
Positive Regulation by Host of Viral Transcription (GO:0043923)	1/17	0.181394	0.4179	5.29775	9.04369	SMARCB1	.
Cellular Response to Sterol (GO:0036315)	1/17	0.181394	0.4179	5.29775	9.04369	NFE2L1	.
Ribosomal Large Subunit Assembly (GO:0000027)	1/17	0.181394	0.4179	5.29775	9.04369	MRM2	.
Positive Regulation of Cartilage Development (GO:0061036)	1/17	0.181394	0.4179	5.29775	9.04369	SOX5	.
Positive Regulation of Cholesterol Metabolic Process (GO:0090205)	1/17	0.181394	0.4179	5.29775	9.04369	PRKCA	.
Positive Regulation of Collagen Metabolic Process (GO:0010714)	1/17	0.181394	0.4179	5.29775	9.04369	TTF2	.
Embryonic Axis Specification (GO:0000578)	1/17	0.181394	0.4179	5.29775	9.04369	TASOR	.
Eye Photoreceptor Cell Development (GO:0042462)	1/17	0.181394	0.4179	5.29775	9.04369	RORB	.
Gastrulation (GO:0007369)	1/17	0.181394	0.4179	5.29775	9.04369	TASOR	.
Gliogenesis (GO:0042063)	1/17	0.181394	0.4179	5.29775	9.04369	CDH2	.
Positive Regulation of Smooth Muscle Cell Migration (GO:0014911)	1/17	0.181394	0.4179	5.29775	9.04369	DOCK7	.
Killing by Host of Symbiont Cells (GO:0051873)	1/17	0.181394	0.4179	5.29775	9.04369	TTF2	.
Membrane Depolarization During Action Potential (GO:0086010)	1/17	0.181394	0.4179	5.29775	9.04369	SCN4B	.
miRNA-mediated Gene Silencing by Inhibition of Translation (GO:0035278)	1/17	0.181394	0.4179	5.29775	9.04369	AGO3	.
rRNA Transcription (GO:0009303)	1/17	0.181394	0.4179	5.29775	9.04369	GTF3C1	.
Negative Regulation of Amyloid Precursor Protein Catabolic Process (GO:1902992)	1/17	0.181394	0.4179	5.29775	9.04369	PDZD2	.
Negative Regulation of Anoikis (GO:2000811)	1/17	0.181394	0.4179	5.29775	9.04369	PIK3R3	.
Reg of Cardiac Muscle Contraction by Reg of the Release of Sequestered Calcium Ion (GO:0010881)	1/17	0.181394	0.4179	5.29775	9.04369	PRKCA	.
Regulation of Cartilage Development (GO:0061035)	1/17	0.181394	0.4179	5.29775	9.04369	SOX5	.
Positive Regulation of Signal Transduction (GO:0009967)	5/256	0.181827	0.418171	1.69758	2.89386	SMARCB1;HOMER1;TMEM108;DCDC2;PRKCA	.
Neurogenesis (GO:0022008)	2/67	0.184832	0.421682	2.61286	4.41132	SPOCK1;BTBD6	.
Negative Regulation of Cell Adhesion (GO:0007162)	2/67	0.184832	0.421682	2.61286	4.41132	SPOCK1;CX3CL1	.
Negative Regulation of RNA Biosynthetic Process (GO:1902679)	8/470	0.187056	0.421682	1.47906	2.47942	IL4;PARP1;PSPC1;PRDM5;RLIM;RORB;LDB2;EZH2	.
Ras Protein Signal Transduction (GO:0007265)	2/68	0.189055	0.421682	2.57315	4.28613	KSR2;RALGPS2	.
Cholesterol Metabolic Process (GO:0008203)	2/68	0.189055	0.421682	2.57315	4.28613	IL4;MVD	.
Regulation of Cell Communication (GO:0010646)	2/68	0.189055	0.421682	2.57315	4.28613	KCNIP1;HCN1	.
Regulation of Exosomal Secretion (GO:1903541)	1/18	0.19098	0.421682	4.98586	8.25452	SMPD3	.
Rac Protein Signal Transduction (GO:0016601)	1/18	0.19098	0.421682	4.98586	8.25452	DOCK7	.
SMAD Protein Signal Transduction (GO:0060395)	1/18	0.19098	0.421682	4.98586	8.25452	SMAD5	.
Regulation of Microtubule Nucleation (GO:0010968)	1/18	0.19098	0.421682	4.98586	8.25452	CKAP5	.
Neuron Maturation (GO:0042551)	1/18	0.19098	0.421682	4.98586	8.25452	CX3CL1	.
Nuclear-Transcribed mRNA poly(A) Tail Shortening (GO:0000289)	1/18	0.19098	0.421682	4.98586	8.25452	CNOT10	.
Nucleobase-Containing Small Molecule Metabolic Process (GO:0055086)	1/18	0.19098	0.421682	4.98586	8.25452	UPP2	.
Regulation of Telomere Maintenance via Telomere Lengthening (GO:1904356)	1/18	0.19098	0.421682	4.98586	8.25452	PARP1	.
Positive Regulation by Host of Viral Process (GO:0044794)	1/18	0.19098	0.421682	4.98586	8.25452	IGF2R	.
Estrogen Receptor Signaling Pathway (GO:0030520)	1/18	0.19098	0.421682	4.98586	8.25452	DDX54	.
Transepithelial Transport (GO:0070633)	1/18	0.19098	0.421682	4.98586	8.25452	RHBG	.
Transposable Element Silencing by Heterochromatin Formation (GO:0141005)	1/18	0.19098	0.421682	4.98586	8.25452	TASOR	.
Melanosome Localization (GO:0032400)	1/18	0.19098	0.421682	4.98586	8.25452	BLOC1S5	.
rRNA Modification (GO:0000154)	1/18	0.19098	0.421682	4.98586	8.25452	MRM2	.
Negative Regulation of DNA-templated Transcription, Elongation (GO:0032785)	1/18	0.19098	0.421682	4.98586	8.25452	PARP1	.
Regulation of Autophagy of Mitochondrion (GO:1903146)	1/18	0.19098	0.421682	4.98586	8.25452	CAMKK2	.
Regulation of Bicellular Tight Junction Assembly (GO:2000810)	1/18	0.19098	0.421682	4.98586	8.25452	PRKCA	.
Regulation of Cellular Respiration (GO:0043457)	1/18	0.19098	0.421682	4.98586	8.25452	IL4	.
Regulation of Protein Catabolic Process (GO:0042176)	3/129	0.192345	0.423991	2.02432	3.33702	PDZD2;PRKCA;ZNF268	.
Autophagosome Organization (GO:1905037)	2/69	0.193291	0.424924	2.53461	4.16579	PACS2;ATG10	.
Positive Regulation of Cellular Process (GO:0048522)	10/622	0.194581	0.424924	1.3972	2.2871	IL4;PBRM1;SMARCB1;RTKN2;PRKCA;MVD;ZNF268;TEAD1;CX3CL1;EZH2	.
Regulation of DNA Repair (GO:0006282)	3/130	0.195316	0.424924	2.00828	3.2798	PBRM1;SMARCB1;PARP1	.
Positive Regulation of Endothelial Cell Proliferation (GO:0001938)	2/70	0.197539	0.424924	2.49721	4.05003	AGTR1;PRKCA	.
Lysosomal Transport (GO:0007041)	2/70	0.197539	0.424924	2.49721	4.05003	CCDC91;IGF2R	.
Negative Regulation of TOR Signaling (GO:0032007)	2/70	0.197539	0.424924	2.49721	4.05003	UBE3A;PRKCA	.
Regulation of Cell Migration (GO:0030334)	8/479	0.200337	0.424924	1.45012	2.33145	IL4;PIK3R3;PRKCA;ELP3;LDB2;ZNF268;CX3CL1;EZH2	.
Negative Regulation of Endopeptidase Activity (GO:0010951)	1/19	0.200454	0.424924	4.70863	7.56757	SPOCK1	.
Regulation of Insulin-Like Growth Factor Receptor Signaling Pathway (GO:0043567)	1/19	0.200454	0.424924	4.70863	7.56757	INPPL1	.
Nuclear Migration (GO:0007097)	1/19	0.200454	0.424924	4.70863	7.56757	DOCK7	.
Positive Regulation of Alcohol Biosynthetic Process (GO:1902932)	1/19	0.200454	0.424924	4.70863	7.56757	PRKCA	.
Positive Regulation of Cell Cycle Phase Transition (GO:1901989)	1/19	0.200454	0.424924	4.70863	7.56757	EZH2	.
Detection of Mechanical Stimulus (GO:0050982)	1/19	0.200454	0.424924	4.70863	7.56757	CDH2	.
Positive Regulation of Embryonic Development (GO:0040019)	1/19	0.200454	0.424924	4.70863	7.56757	NLRP5	.
Eosinophil Chemotaxis (GO:0048245)	1/19	0.200454	0.424924	4.70863	7.56757	CX3CL1	.
Eosinophil Migration (GO:0072677)	1/19	0.200454	0.424924	4.70863	7.56757	CX3CL1	.
Female Meiotic Nuclear Division (GO:0007143)	1/19	0.200454	0.424924	4.70863	7.56757	RBM46	.
Glycoprotein Catabolic Process (GO:0006516)	1/19	0.200454	0.424924	4.70863	7.56757	STT3B	.
Heme Biosynthetic Process (GO:0006783)	1/19	0.200454	0.424924	4.70863	7.56757	NFE2L1	.
Positive Regulation of Stem Cell Differentiation (GO:2000738)	1/19	0.200454	0.424924	4.70863	7.56757	SOX5	.
Membrane Repolarization (GO:0086009)	1/19	0.200454	0.424924	4.70863	7.56757	KCNIP1	.
Microglial Cell Activation (GO:0001774)	1/19	0.200454	0.424924	4.70863	7.56757	CX3CL1	.
Mitochondrial Fusion (GO:0008053)	1/19	0.200454	0.424924	4.70863	7.56757	USP30	.
rRNA Methylation (GO:0031167)	1/19	0.200454	0.424924	4.70863	7.56757	MRM2	.
Positive Regulation of Multicellular Organismal Process (GO:0051240)	7/407	0.201085	0.425582	1.49297	2.39477	IL4;SMARCB1;NLRP5;PRKCA;KSR2;SOX5;EZH2	.
Positive Regulation of RNA Biosynthetic Process (GO:1902680)	9/555	0.204036	0.429434	1.40806	2.23805	IL4;NEK4;RORB;TEAD1;SMAD5;TEAD2;GDF7;MED17;CAMKK2	.
Telomere Maintenance (GO:0000723)	2/72	0.206068	0.429434	2.42562	3.83138	RAD50;PARP1	.
Regulation of Cell Differentiation (GO:0045595)	4/201	0.209757	0.429434	1.72757	2.69812	PBRM1;SMARCB1;PRKCA;ZNF268	.
Regulation of Collagen Biosynthetic Process (GO:0032965)	1/20	0.209818	0.429434	4.46058	6.96527	TTF2	.
Regulation of Endopeptidase Activity (GO:0052548)	1/20	0.209818	0.429434	4.46058	6.96527	SPOCK1	.
DNA-templated Transcription Termination (GO:0006353)	1/20	0.209818	0.429434	4.46058	6.96527	TTF2	.
Regulation of Necroptotic Process (GO:0060544)	1/20	0.209818	0.429434	4.46058	6.96527	PARP1	.
Bicarbonate Transport (GO:0015701)	1/20	0.209818	0.429434	4.46058	6.96527	SLC4A8	.
Regulation of Sodium Ion Transmembrane Transport (GO:1902305)	1/20	0.209818	0.429434	4.46058	6.96527	SCN4B	.
Phosphatidylinositol Dephosphorylation (GO:0046856)	1/20	0.209818	0.429434	4.46058	6.96527	MTMR1	.
Response to Cholesterol (GO:0070723)	1/20	0.209818	0.429434	4.46058	6.96527	NFE2L1	.
Positive Regulation of Blood Coagulation (GO:0030194)	1/20	0.209818	0.429434	4.46058	6.96527	TTF2	.
snRNA Processing (GO:0016180)	1/20	0.209818	0.429434	4.46058	6.96527	INTS3	.
Positive Regulation of Macrophage Migration (GO:1905523)	1/20	0.209818	0.429434	4.46058	6.96527	CX3CL1	.
Positive Regulation of Osteoclast Differentiation (GO:0045672)	1/20	0.209818	0.429434	4.46058	6.96527	EEIG1	.
Protein Heterooligomerization (GO:0051291)	1/20	0.209818	0.429434	4.46058	6.96527	FARSB	.
Multicellular Organismal-Level Water Homeostasis (GO:0050891)	1/20	0.209818	0.429434	4.46058	6.96527	PRKCA	.
Regulation of Cardiac Conduction (GO:1903779)	1/20	0.209818	0.429434	4.46058	6.96527	PRKCA	.
Regulation of Cellular Response to Transforming Growth Factor Beta Stimulus (GO:1903844)	1/20	0.209818	0.429434	4.46058	6.96527	IL4	.
Positive Regulation of Cell-Substrate Adhesion (GO:0010811)	2/73	0.210348	0.429434	2.39133	3.72806	DOCK1;CX3CL1	.
Spindle Assembly (GO:0051225)	2/73	0.210348	0.429434	2.39133	3.72806	RCC1;LSM14A	.
Embryonic Organ Development (GO:0048568)	2/73	0.210348	0.429434	2.39133	3.72806	TEAD1;TEAD2	.
Heterochromatin Formation (GO:0031507)	2/73	0.210348	0.429434	2.39133	3.72806	TASOR;EZH2	.
Receptor-Mediated Endocytosis (GO:0006898)	3/136	0.21337	0.434542	1.9171	2.96139	TMEM108;AP2A2;IGF2R	.
Negative Regulation of Apoptotic Signaling Pathway (GO:2001234)	2/74	0.214637	0.434542	2.358	3.62851	RTKN2;CX3CL1	.
Regulation of Plasma Membrane Bounded Cell Projection Assembly (GO:0120032)	2/75	0.218934	0.434542	2.32558	3.53252	IFT140;DCDC2	.
Import Into Nucleus (GO:0051170)	2/75	0.218934	0.434542	2.32558	3.53252	NUP133;TNPO3	.
Negative Regulation of Cilium Assembly (GO:1902018)	1/21	0.219072	0.434542	4.23734	6.43378	CCP110	.
COPII Vesicle Coating (GO:0048208)	1/21	0.219072	0.434542	4.23734	6.43378	KLHL12	.
Regulation of Epithelial Cell Differentiation (GO:0030856)	1/21	0.219072	0.434542	4.23734	6.43378	NFE2L1	.
RNA-templated DNA Biosynthetic Process (GO:0006278)	1/21	0.219072	0.434542	4.23734	6.43378	RAD50	.
Regulation of Membrane Depolarization (GO:0003254)	1/21	0.219072	0.434542	4.23734	6.43378	HCN1	.
Regulation of Neuroinflammatory Response (GO:0150077)	1/21	0.219072	0.434542	4.23734	6.43378	IL4	.
Regulation of Synaptic Vesicle Exocytosis (GO:2000300)	1/21	0.219072	0.434542	4.23734	6.43378	SLC4A8	.
Porphyrin-Containing Compound Biosynthetic Process (GO:0006779)	1/21	0.219072	0.434542	4.23734	6.43378	NFE2L1	.
Endoplasmic Reticulum Calcium Ion Homeostasis (GO:0032469)	1/21	0.219072	0.434542	4.23734	6.43378	PACS2	.
Entrainment of Circadian Clock by Photoperiod (GO:0043153)	1/21	0.219072	0.434542	4.23734	6.43378	CRTC1	.
Telomere Maintenance via Telomerase (GO:0007004)	1/21	0.219072	0.434542	4.23734	6.43378	RAD50	.
Vesicle Targeting, Rough ER to cis-Golgi (GO:0048207)	1/21	0.219072	0.434542	4.23734	6.43378	KLHL12	.
Positive Regulation of Smoothened Signaling Pathway (GO:0045880)	1/21	0.219072	0.434542	4.23734	6.43378	DCDC2	.
Negative Regulation of Amide Metabolic Process (GO:0034249)	1/21	0.219072	0.434542	4.23734	6.43378	PDZD2	.
Regulation of Cardiac Muscle Cell Membrane Repolarization (GO:0099623)	1/21	0.219072	0.434542	4.23734	6.43378	SCN4B	.
Neuron Projection Development (GO:0031175)	4/206	0.22202	0.437007	1.68437	2.53496	BLOC1S5;DOCK7;TMEM108;CDK16	.
Regulation of Cytoskeleton Organization (GO:0051493)	3/139	0.222529	0.437007	1.87452	2.81684	EPHA5;DVL2;EFNA5	.
Lymphocyte Differentiation (GO:0030098)	2/76	0.223238	0.437007	2.29404	3.43995	IL4;PIK3R3	.
Protein Deubiquitination (GO:0016579)	2/76	0.223238	0.437007	2.29404	3.43995	USP47;USP30	.
Cellular Component Assembly (GO:0022607)	5/277	0.224922	0.437007	1.56483	2.33472	FANCC;FSCN2;KIFAP3;TEAD1;TEAD2	.
Regulation of Non-Canonical NF-kappaB Signal Transduction (GO:1901222)	2/77	0.227548	0.437007	2.26333	3.35062	RTKN2;ZNF268	.
Nucleosome Organization (GO:0034728)	2/77	0.227548	0.437007	2.26333	3.35062	SUPT16H;SMARCB1	.
Cellular Response to Hypoxia (GO:0071456)	2/77	0.227548	0.437007	2.26333	3.35062	NPEPPS;PDZD2	.
Negative Regulation of Myeloid Cell Differentiation (GO:0045638)	1/22	0.228219	0.437007	4.03536	5.96204	LDB2	.
Regulation of Mitotic Spindle Assembly (GO:1901673)	1/22	0.228219	0.437007	4.03536	5.96204	RCC1	.
Anterior/Posterior Axis Specification (GO:0009948)	1/22	0.228219	0.437007	4.03536	5.96204	TASOR	.
Cell Migration Involved in Sprouting Angiogenesis (GO:0002042)	1/22	0.228219	0.437007	4.03536	5.96204	PIK3R3	.
Peptidyl-Tyrosine Dephosphorylation (GO:0035335)	1/22	0.228219	0.437007	4.03536	5.96204	PTPN13	.
Photoperiodism (GO:0009648)	1/22	0.228219	0.437007	4.03536	5.96204	CRTC1	.
Diacylglycerol Metabolic Process (GO:0046339)	1/22	0.228219	0.437007	4.03536	5.96204	DGKG	.
snRNA Metabolic Process (GO:0016073)	1/22	0.228219	0.437007	4.03536	5.96204	INTS3	.
Establishment of Protein Localization to Vacuole (GO:0072666)	1/22	0.228219	0.437007	4.03536	5.96204	VPS13C	.
Positive Regulation of Neural Precursor Cell Proliferation (GO:2000179)	1/22	0.228219	0.437007	4.03536	5.96204	CX3CL1	.
Inositol Phosphate Metabolic Process (GO:0043647)	1/22	0.228219	0.437007	4.03536	5.96204	OCRL	.
Post-Transcriptional Gene Silencing (GO:0016441)	1/22	0.228219	0.437007	4.03536	5.96204	AGO3	.
Modulation by Host of Viral Process (GO:0044788)	1/22	0.228219	0.437007	4.03536	5.96204	IGF2R	.
Regulation of Anoikis (GO:2000209)	1/22	0.228219	0.437007	4.03536	5.96204	PIK3R3	.
Negative Regulation of SMAD Protein Signal Transduction (GO:0060392)	1/22	0.228219	0.437007	4.03536	5.96204	PDZD2	.
Regulation of Cardiac Muscle Contraction by Calcium Ion Signaling (GO:0010882)	1/22	0.228219	0.437007	4.03536	5.96204	PRKCA	.
Cell Chemotaxis (GO:0060326)	2/78	0.231865	0.442076	2.23344	3.26439	AGTR1;CX3CL1	.
Cellular Response to Decreased Oxygen Levels (GO:0036294)	2/78	0.231865	0.442076	2.23344	3.26439	NPEPPS;PDZD2	.
Positive Regulation of Macroautophagy (GO:0016239)	2/78	0.231865	0.442076	2.23344	3.26439	IL4;AMBRA1	.
Protein Homooligomerization (GO:0051260)	3/143	0.23486	0.444065	1.82059	2.63762	SHMT1;SIGMAR1;HCN1	.
Sphingolipid Metabolic Process (GO:0006665)	2/79	0.236187	0.444065	2.20432	3.18113	SMPD3;CERS6	.
Negative Regulation of Interleukin-2 Production (GO:0032703)	1/23	0.237258	0.444065	3.85174	5.54113	PRKCA	.
Negative Regulation of Osteoclast Differentiation (GO:0045671)	1/23	0.237258	0.444065	3.85174	5.54113	IL4	.
Negative Regulation of Peptidase Activity (GO:0010466)	1/23	0.237258	0.444065	3.85174	5.54113	SPOCK1	.
Nuclear Membrane Reassembly (GO:0031468)	1/23	0.237258	0.444065	3.85174	5.54113	RCC1	.
Carbohydrate Derivative Catabolic Process (GO:1901136)	1/23	0.237258	0.444065	3.85174	5.54113	STT3B	.
poly(A)+ mRNA Export From Nucleus (GO:0016973)	1/23	0.237258	0.444065	3.85174	5.54113	NUP133	.
Regulatory ncRNA-mediated Post-Transcriptional Gene Silencing (GO:0035194)	1/23	0.237258	0.444065	3.85174	5.54113	AGO3	.
Positive Regulation of T Cell Cytokine Production (GO:0002726)	1/23	0.237258	0.444065	3.85174	5.54113	IL4	.
Dendritic Cell Differentiation (GO:0097028)	1/23	0.237258	0.444065	3.85174	5.54113	IL4	.
Sodium Ion Import Across Plasma Membrane (GO:0098719)	1/23	0.237258	0.444065	3.85174	5.54113	HCN1	.
Regulation of Cholesterol Biosynthetic Process (GO:0045540)	1/23	0.237258	0.444065	3.85174	5.54113	PRKCA	.
Synapse Organization (GO:0050808)	3/144	0.237962	0.444753	1.80759	2.59506	PDZD2;CDH2;CX3CL1	.
Protein Import Into Nucleus (GO:0006606)	2/80	0.240513	0.447531	2.17595	3.10069	NUP133;TNPO3	.
Regulation of Cytokinesis (GO:0032465)	2/81	0.244843	0.447531	2.1483	3.02295	PDZD2;CCP110	.
Protein Modification by Small Protein Removal (GO:0070646)	2/81	0.244843	0.447531	2.1483	3.02295	USP47;USP30	.
Regulation of Extracellular Matrix Organization (GO:1903053)	1/24	0.246193	0.447531	3.68408	5.16376	PRDM5	.
Regulation of Intracellular Steroid Hormone Receptor Signaling Pathway (GO:0033143)	1/24	0.246193	0.447531	3.68408	5.16376	CARM1	.
RNA Splicing, via Transesterification Reactions (GO:0000375)	1/24	0.246193	0.447531	3.68408	5.16376	MPHOSPH10	.
cAMP-mediated Signaling (GO:0019933)	1/24	0.246193	0.447531	3.68408	5.16376	PDE5A	.
Regulation of Release of Sequestered Calcium Ion Into Cytosol by Sarcoplasmic Reticulum (GO:0010880)	1/24	0.246193	0.447531	3.68408	5.16376	PRKCA	.
Osteoclast Differentiation (GO:0030316)	1/24	0.246193	0.447531	3.68408	5.16376	GLO1	.
Phosphatidylglycerol Metabolic Process (GO:0046471)	1/24	0.246193	0.447531	3.68408	5.16376	CRLS1	.
Positive Regulation of JUN Kinase Activity (GO:0043507)	1/24	0.246193	0.447531	3.68408	5.16376	DVL2	.
Response to Ketone (GO:1901654)	1/24	0.246193	0.447531	3.68408	5.16376	UBE3A	.
Secondary Alcohol Biosynthetic Process (GO:1902653)	1/24	0.246193	0.447531	3.68408	5.16376	MVD	.
Vesicle Transport Along Microtubule (GO:0047496)	1/24	0.246193	0.447531	3.68408	5.16376	KIFAP3	.
Potassium Ion Homeostasis (GO:0055075)	1/24	0.246193	0.447531	3.68408	5.16376	PRKCA	.
Macrophage Differentiation (GO:0030225)	1/24	0.246193	0.447531	3.68408	5.16376	PARP1	.
Male Gamete Generation (GO:0048232)	1/24	0.246193	0.447531	3.68408	5.16376	RBM46	.
Purine-Containing Compound Biosynthetic Process (GO:0072522)	1/24	0.246193	0.447531	3.68408	5.16376	SHMT1	.
Mismatch Repair (GO:0006298)	1/24	0.246193	0.447531	3.68408	5.16376	RNASEH2B	.
Myotube Differentiation (GO:0014902)	1/24	0.246193	0.447531	3.68408	5.16376	DOCK1	.
Central Nervous System Development (GO:0007417)	5/288	0.248623	0.451331	1.50316	2.09212	CHST8;SPOCK1;ELP3;UBE3A;AFF2	.
Regulation of Cold-Induced Thermogenesis (GO:0120161)	3/148	0.250437	0.452737	1.75737	2.43316	IL4;DOCK7;KSR2	.
Wnt Signaling Pathway (GO:0016055)	2/83	0.253511	0.452737	2.09504	2.87512	DVL2;KLHL12	.
Negative Regulation of Interleukin-1 Beta Production (GO:0032691)	1/25	0.255023	0.452737	3.5304	4.82395	CX3CL1	.
Activin Receptor Signaling Pathway (GO:0032924)	1/25	0.255023	0.452737	3.5304	4.82395	GDF7	.
Nucleic Acid Metabolic Process (GO:0090304)	1/25	0.255023	0.452737	3.5304	4.82395	DDX54	.
Cardiac Conduction System Development (GO:0003161)	1/25	0.255023	0.452737	3.5304	4.82395	SMAD5	.
Organophosphate Ester Transport (GO:0015748)	1/25	0.255023	0.452737	3.5304	4.82395	PRELID2	.
Cell Surface Receptor Protein Serine/Threonine Kinase Signaling Pathway (GO:0007178)	1/25	0.255023	0.452737	3.5304	4.82395	SMAD5	.
Phosphatidylethanolamine Metabolic Process (GO:0046337)	1/25	0.255023	0.452737	3.5304	4.82395	ETNK2	.
Pigment Biosynthetic Process (GO:0046148)	1/25	0.255023	0.452737	3.5304	4.82395	NFE2L1	.
Cholesterol Biosynthetic Process (GO:0006695)	1/25	0.255023	0.452737	3.5304	4.82395	MVD	.
Stress Granule Assembly (GO:0034063)	1/25	0.255023	0.452737	3.5304	4.82395	LSM14A	.
Epithelial Cell Development (GO:0002064)	1/25	0.255023	0.452737	3.5304	4.82395	CDH2	.
Protein Lipidation (GO:0006497)	1/25	0.255023	0.452737	3.5304	4.82395	ATG10	.
Regulation of B Cell Activation (GO:0050864)	1/25	0.255023	0.452737	3.5304	4.82395	IL4	.
Regulation of Cell Junction Assembly (GO:1901888)	1/25	0.255023	0.452737	3.5304	4.82395	PRKCA	.
RNA Processing (GO:0006396)	5/291	0.255198	0.452737	1.48716	2.03104	INTS3;MPHOSPH10;DDX54;PRKCA;MRM2	.
Macromolecule Modification (GO:0043412)	2/84	0.257849	0.456829	2.06939	2.80481	PARP1;FBXO11	.
Positive Regulation of Endocytosis (GO:0045807)	2/85	0.262187	0.457511	2.04435	2.73677	IL4;PRKCA	.
Regulation of Cell Growth (GO:0001558)	4/222	0.262403	0.457511	1.55947	2.08638	GNG4;AGTR1;SPOCK1;TEAD1	.
Negative Regulation of Endothelial Cell Apoptotic Process (GO:2000352)	1/26	0.26375	0.457511	3.38901	4.51672	IL4	.
Negative Regulation of Lipid Biosynthetic Process (GO:0051055)	1/26	0.26375	0.457511	3.38901	4.51672	ASXL3	.
Regulation of Platelet Aggregation (GO:0090330)	1/26	0.26375	0.457511	3.38901	4.51672	PRKCA	.
Blood Vessel Endothelial Cell Migration (GO:0043534)	1/26	0.26375	0.457511	3.38901	4.51672	PIK3R3	.
Cell-Cell Adhesion Mediated by Cadherin (GO:0044331)	1/26	0.26375	0.457511	3.38901	4.51672	CDH2	.
tRNA Metabolic Process (GO:0006399)	1/26	0.26375	0.457511	3.38901	4.51672	GTF3C1	.
Transposable Element Silencing (GO:0010526)	1/26	0.26375	0.457511	3.38901	4.51672	TASOR	.
Hormone Biosynthetic Process (GO:0042446)	1/26	0.26375	0.457511	3.38901	4.51672	CHST8	.
Protein Depolymerization (GO:0051261)	1/26	0.26375	0.457511	3.38901	4.51672	CKAP5	.
Macromolecule Methylation (GO:0043414)	1/26	0.26375	0.457511	3.38901	4.51672	MRM2	.
Proteoglycan Metabolic Process (GO:0006029)	1/26	0.26375	0.457511	3.38901	4.51672	CHST8	.
Microtubule Polymerization or Depolymerization (GO:0031109)	1/26	0.26375	0.457511	3.38901	4.51672	PDZD2	.
Regulation of Actin Filament Bundle Assembly (GO:0032231)	1/26	0.26375	0.457511	3.38901	4.51672	CX3CL1	.
Regulation of Cell Size (GO:0008361)	1/26	0.26375	0.457511	3.38901	4.51672	ARHGAP5	.
Regulation of ERK1 and ERK2 Cascade (GO:0070372)	4/223	0.264975	0.459037	1.55227	2.0616	PDZD2;PRKCA;SYNJ2BP;CX3CL1	.
Cell Surface Receptor Protein Tyrosine Kinase Signaling Pathway (GO:0007169)	5/296	0.266249	0.46052	1.46123	1.93368	EPHA5;SIPA1L1;DOK6;PIK3R3;EFNA5	.
Regulation of Organelle Assembly (GO:1902115)	2/86	0.266526	0.46052	2.01991	2.6709	IFT140;DCDC2	.
Regulation of Endothelial Cell Proliferation (GO:0001936)	2/87	0.270864	0.462202	1.99604	2.60711	PRKCA;SYNJ2BP	.
Defense Response to Gram-negative Bacterium (GO:0050829)	2/87	0.270864	0.462202	1.99604	2.60711	DROSHA;TTF2	.
Protein Phosphorylation (GO:0006468)	6/373	0.272375	0.462202	1.39101	1.80911	TBCK;NEK4;NEK1;PRKCA;CDK16;CAMKK2	.
ER-nucleus Signaling Pathway (GO:0006984)	1/27	0.272375	0.462202	3.2585	4.23792	ATG10	.
Regulation of Intracellular Estrogen Receptor Signaling Pathway (GO:0033146)	1/27	0.272375	0.462202	3.2585	4.23792	CARM1	.
Regulation of Kinase Activity (GO:0043549)	1/27	0.272375	0.462202	3.2585	4.23792	LDB2	.
Wnt Signaling Pathway, Planar Cell Polarity Pathway (GO:0060071)	1/27	0.272375	0.462202	3.2585	4.23792	DVL2	.
Cardiac Muscle Cell Contraction (GO:0086003)	1/27	0.272375	0.462202	3.2585	4.23792	SCN4B	.
Peptide Hormone Secretion (GO:0030072)	1/27	0.272375	0.462202	3.2585	4.23792	CDK16	.
Cellular Catabolic Process (GO:0044248)	1/27	0.272375	0.462202	3.2585	4.23792	NPEPPS	.
Phagocytosis, Engulfment (GO:0006911)	1/27	0.272375	0.462202	3.2585	4.23792	DOCK1	.
Plasma Membrane Invagination (GO:0099024)	1/27	0.272375	0.462202	3.2585	4.23792	DOCK1	.
miRNA-mediated Post-Transcriptional Gene Silencing (GO:0035195)	1/27	0.272375	0.462202	3.2585	4.23792	AGO3	.
Regulation of Cation Channel Activity (GO:2001257)	1/27	0.272375	0.462202	3.2585	4.23792	HOMER1	.
Regulation of Endothelial Cell Migration (GO:0010594)	2/88	0.275202	0.466403	1.97273	2.54532	PRKCA;SYNJ2BP	.
Neuron Projection Morphogenesis (GO:0048812)	3/157	0.278828	0.467697	1.6539	2.1123	IMPACT;DOCK7;DCDC2	.
Positive Regulation of Canonical Wnt Signaling Pathway (GO:0090263)	2/89	0.279539	0.467697	1.94996	2.48545	USP47;PDZD2	.
Regulation of Lipid Biosynthetic Process (GO:0046890)	1/28	0.2809	0.467697	3.13766	3.98406	ASXL3	.
Negative Regulation of Telomere Maintenance via Telomere Lengthening (GO:1904357)	1/28	0.2809	0.467697	3.13766	3.98406	PARP1	.
Phospholipid Biosynthetic Process (GO:0008654)	1/28	0.2809	0.467697	3.13766	3.98406	SAMD8	.
Phospholipid Catabolic Process (GO:0009395)	1/28	0.2809	0.467697	3.13766	3.98406	SMPD3	.
Cellular Response to Hexose Stimulus (GO:0071331)	1/28	0.2809	0.467697	3.13766	3.98406	PRKCA	.
Positive Regulation of ATP Metabolic Process (GO:1903580)	1/28	0.2809	0.467697	3.13766	3.98406	IL4	.
Sterol Biosynthetic Process (GO:0016126)	1/28	0.2809	0.467697	3.13766	3.98406	MVD	.
Telomere Maintenance via Telomere Lengthening (GO:0010833)	1/28	0.2809	0.467697	3.13766	3.98406	RAD50	.
Positive Regulation of Mitotic Cell Cycle (GO:0045931)	1/28	0.2809	0.467697	3.13766	3.98406	PRKCA	.
Glial Cell Differentiation (GO:0010001)	1/28	0.2809	0.467697	3.13766	3.98406	CDH2	.
Primary Neural Tube Formation (GO:0014020)	1/28	0.2809	0.467697	3.13766	3.98406	DVL2	.
Regulation of Cardiac Muscle Cell Action Potential (GO:0098901)	1/28	0.2809	0.467697	3.13766	3.98406	HCN1	.
Actin Filament Organization (GO:0007015)	3/158	0.282004	0.468946	1.64315	2.07996	NEBL;NLRP5;INPPL1	.
Establishment of Protein Localization to Organelle (GO:0072594)	2/90	0.283874	0.471465	1.9277	2.42741	NUP133;TNPO3	.
Regulation of Epithelial to Mesenchymal Transition (GO:0010717)	2/91	0.288206	0.473993	1.90595	2.37115	FBXO11;EZH2	.
Translation (GO:0006412)	4/232	0.28832	0.473993	1.49031	1.85348	MRPS22;MRPL19;FARSB;ABCF1	.
Gene Expression (GO:0010467)	6/381	0.288394	0.473993	1.36077	1.69202	THRB;NUP133;MPHOSPH10;DDX54;FARSB;ABCF1	.
Negative Regulation of Interleukin-1 Production (GO:0032692)	1/29	0.289325	0.473993	3.02544	3.75217	CX3CL1	.
Negative Regulation of Wound Healing (GO:0061045)	1/29	0.289325	0.473993	3.02544	3.75217	TTF2	.
Regulation of Plasma Membrane Bounded Cell Projection Organization (GO:0120035)	1/29	0.289325	0.473993	3.02544	3.75217	HOMER1	.
Organelle Fusion (GO:0048284)	1/29	0.289325	0.473993	3.02544	3.75217	USP30	.
Regulation of Supramolecular Fiber Organization (GO:1902903)	1/29	0.289325	0.473993	3.02544	3.75217	INPPL1	.
Tube Closure (GO:0060606)	1/29	0.289325	0.473993	3.02544	3.75217	DVL2	.
Positive Regulation of Protein Targeting to Mitochondrion (GO:1903955)	1/29	0.289325	0.473993	3.02544	3.75217	NPEPPS	.
Regulation of Blood Coagulation (GO:0030193)	1/29	0.289325	0.473993	3.02544	3.75217	TTF2	.
Negative Regulation of Mitotic Cell Cycle (GO:0045930)	1/30	0.297652	0.480516	2.92097	3.53972	RBM46	.
Neural Tube Closure (GO:0001843)	1/30	0.297652	0.480516	2.92097	3.53972	DVL2	.
Regulation of Vasoconstriction (GO:0019229)	1/30	0.297652	0.480516	2.92097	3.53972	AGTR1	.
Positive Regulation of B Cell Proliferation (GO:0030890)	1/30	0.297652	0.480516	2.92097	3.53972	IL4	.
Clathrin-Dependent Endocytosis (GO:0072583)	1/30	0.297652	0.480516	2.92097	3.53972	AP2A2	.
Positive Regulation of Calcium-Mediated Signaling (GO:0050850)	1/30	0.297652	0.480516	2.92097	3.53972	PRKCA	.
Positive Regulation of Interleukin-10 Production (GO:0032733)	1/30	0.297652	0.480516	2.92097	3.53972	IL4	.
Positive Regulation of Microtubule Polymerization (GO:0031116)	1/30	0.297652	0.480516	2.92097	3.53972	CKAP5	.
Vesicle Coating (GO:0006901)	1/30	0.297652	0.480516	2.92097	3.53972	KLHL12	.
Pyroptotic Inflammatory Response (GO:0070269)	1/30	0.297652	0.480516	2.92097	3.53972	GSDMC	.
Regulation of Bone Resorption (GO:0045124)	1/30	0.297652	0.480516	2.92097	3.53972	PRKCA	.
Regulation of Cell Morphogenesis (GO:0022604)	1/30	0.297652	0.480516	2.92097	3.53972	EFNA5	.
Regulation of Immune Response (GO:0050776)	2/94	0.301185	0.485039	1.84352	2.21228	IL4;INPPL1	.
Mitochondrial Translation (GO:0032543)	2/94	0.301185	0.485039	1.84352	2.21228	MRPS22;MRPL19	.
Regulation of Dendritic Spine Morphogenesis (GO:0061001)	1/31	0.305882	0.486697	2.82346	3.34455	SIPA1L1	.
Regulation of Immunoglobulin Production (GO:0002637)	1/31	0.305882	0.486697	2.82346	3.34455	IL4	.
Activation of GTPase Activity (GO:0090630)	1/31	0.305882	0.486697	2.82346	3.34455	SIPA1L1	.
Regulation of Protein Modification Process (GO:0031399)	1/31	0.305882	0.486697	2.82346	3.34455	ATG10	.
Regulation of Spindle Assembly (GO:0090169)	1/31	0.305882	0.486697	2.82346	3.34455	RCC1	.
Regulation of Transcription by RNA Polymerase I (GO:0006356)	1/31	0.305882	0.486697	2.82346	3.34455	CARM1	.
Phosphatidic Acid Biosynthetic Process (GO:0006654)	1/31	0.305882	0.486697	2.82346	3.34455	DGKG	.
Establishment of Mitotic Spindle Orientation (GO:0000132)	1/31	0.305882	0.486697	2.82346	3.34455	INPPL1	.
Modulation of Excitatory Postsynaptic Potential (GO:0098815)	1/31	0.305882	0.486697	2.82346	3.34455	TMEM108	.
Negative Regulation of Blood Coagulation (GO:0030195)	1/31	0.305882	0.486697	2.82346	3.34455	TTF2	.
B Cell Activation (GO:0042113)	2/96	0.309815	0.492365	1.80411	2.11402	IL4;PIK3R3	.
Regulation of Apoptotic Process (GO:0042981)	10/704	0.310775	0.49272	1.22684	1.43379	IL4;ARHGAP10;AREL1;GLO1;SIGMAR1;WDR73;ZNF268;FBXO11;SMAD5;CX3CL1	.
Negative Regulation of Interleukin-6 Production (GO:0032715)	1/32	0.314016	0.49272	2.73224	3.16479	CX3CL1	.
Regulation of Macrophage Derived Foam Cell Differentiation (GO:0010743)	1/32	0.314016	0.49272	2.73224	3.16479	AGTR1	.
Nuclear Receptor-Mediated Signaling Pathway (GO:0141193)	1/32	0.314016	0.49272	2.73224	3.16479	THRB	.
Chondrocyte Differentiation (GO:0002062)	1/32	0.314016	0.49272	2.73224	3.16479	SOX5	.
Response to Steroid Hormone (GO:0048545)	1/32	0.314016	0.49272	2.73224	3.16479	UBE3A	.
Sphingolipid Catabolic Process (GO:0030149)	1/32	0.314016	0.49272	2.73224	3.16479	SMPD3	.
Positive Regulation of Establishment of Protein Localization to Mitochondrion (GO:1903749)	1/32	0.314016	0.49272	2.73224	3.16479	NPEPPS	.
Protein Localization to Golgi Apparatus (GO:0034067)	1/32	0.314016	0.49272	2.73224	3.16479	VPS13C	.
Protein Targeting to Vacuole (GO:0006623)	1/32	0.314016	0.49272	2.73224	3.16479	VPS13C	.
Regulation of TORC1 Signaling (GO:1903432)	2/97	0.314123	0.49272	1.78503	2.06701	UBE3A;PRKCA	.
Regulation of Cell Cycle (GO:0051726)	5/318	0.315979	0.495046	1.35699	1.56336	TADA2A;RCC1;PRKCA;ZNF268;KAT14	.
Cellular Response to Nitrogen Compound (GO:1901699)	3/169	0.317098	0.49582	1.53341	1.76119	CRTC1;SHMT1;HCN1	.
Negative Regulation of Multicellular Organismal Process (GO:0051241)	4/243	0.31722	0.49582	1.42092	1.63144	IL4;PARP1;DOCK7;FBXO11	.
Cellular Response to Transforming Growth Factor Beta Stimulus (GO:0071560)	2/98	0.318424	0.497117	1.76634	2.02135	SMAD5;SOX5	.
Regulation of Macromolecule Biosynthetic Process (GO:0010556)	3/170	0.320297	0.498544	1.52415	1.73525	PDZD2;AFF2;KDM6A	.
Negative Regulation of Lipid Metabolic Process (GO:0045833)	1/33	0.322055	0.498544	2.64673	2.99883	ASXL3	.
Actin Filament Bundle Assembly (GO:0051017)	1/33	0.322055	0.498544	2.64673	2.99883	FSCN2	.
Transcription by RNA Polymerase III (GO:0006383)	1/33	0.322055	0.498544	2.64673	2.99883	GTF3C1	.
Heme Metabolic Process (GO:0042168)	1/33	0.322055	0.498544	2.64673	2.99883	NFE2L1	.
Regulation of Amyloid-Beta Formation (GO:1902003)	1/33	0.322055	0.498544	2.64673	2.99883	PDZD2	.
Cytosolic Transport (GO:0016482)	2/99	0.32272	0.498544	1.74804	1.97699	CCDC91;VPS13C	.
Positive Regulation of Cold-Induced Thermogenesis (GO:0120162)	2/99	0.32272	0.498544	1.74804	1.97699	IL4;KSR2	.
Positive Regulation of Neuron Projection Development (GO:0010976)	2/99	0.32272	0.498544	1.74804	1.97699	KIDINS220;CX3CL1	.
Cell-Cell Adhesion via Plasma-Membrane Adhesion Molecules (GO:0098742)	3/171	0.323496	0.498582	1.515	1.70978	CDH2;DSG1;HMCN1	.
Heart Development (GO:0007507)	3/171	0.323496	0.498582	1.515	1.70978	SGCD;DVL2;KDM6A	.
Mitochondrial Gene Expression (GO:0140053)	2/100	0.327008	0.503344	1.73012	1.93388	MRPS22;MRPL19	.
Actin Filament Bundle Organization (GO:0061572)	1/34	0.33	0.503344	2.56639	2.84527	FSCN2	.
Regulation of Response to Biotic Stimulus (GO:0002831)	1/34	0.33	0.503344	2.56639	2.84527	CX3CL1	.
Cardiac Muscle Contraction (GO:0060048)	1/34	0.33	0.503344	2.56639	2.84527	SCN4B	.
Phospholipid Dephosphorylation (GO:0046839)	1/34	0.33	0.503344	2.56639	2.84527	MTMR1	.
Integrated Stress Response Signaling (GO:0140467)	1/34	0.33	0.503344	2.56639	2.84527	IMPACT	.
Mitochondrial Electron Transport, NADH to Ubiquinone (GO:0006120)	1/34	0.33	0.503344	2.56639	2.84527	NDUFS1	.
Regulation of JUN Kinase Activity (GO:0043506)	1/34	0.33	0.503344	2.56639	2.84527	DVL2	.
Regulation of Cell Cycle Phase Transition (GO:1901987)	1/34	0.33	0.503344	2.56639	2.84527	CDK16	.
Cell Junction Assembly (GO:0034329)	2/101	0.33129	0.504153	1.71256	1.89197	CDH2;DSG1	.
Recombinational Repair (GO:0000725)	2/101	0.33129	0.504153	1.71256	1.89197	RAD50;INTS3	.
Phospholipase C-activating G Protein-Coupled Receptor Signaling Pathway (GO:0007200)	2/102	0.335563	0.50716	1.69534	1.85122	HOMER1;AGTR1	.
Negative Regulation of Cytoplasmic Pattern Recognition Receptor Signaling Pathway (GO:0039532)	1/35	0.337852	0.50716	2.49079	2.70287	PARP1	.
NADH Dehydrogenase Complex Assembly (GO:0010257)	1/35	0.337852	0.50716	2.49079	2.70287	NDUFS1	.
Negative Regulation of Myeloid Leukocyte Differentiation (GO:0002762)	1/35	0.337852	0.50716	2.49079	2.70287	IL4	.
Negative Regulation of Osteoblast Differentiation (GO:0045668)	1/35	0.337852	0.50716	2.49079	2.70287	RORB	.
Adherens Junction Organization (GO:0034332)	1/35	0.337852	0.50716	2.49079	2.70287	CDH2	.
Response to Transforming Growth Factor Beta (GO:0071559)	1/35	0.337852	0.50716	2.49079	2.70287	SOX5	.
Dendrite Morphogenesis (GO:0048813)	1/35	0.337852	0.50716	2.49079	2.70287	DCDC2	.
Positive Regulation of Substrate Adhesion-Dependent Cell Spreading (GO:1900026)	1/35	0.337852	0.50716	2.49079	2.70287	DOCK1	.
Positive Regulation of Synapse Assembly (GO:0051965)	1/35	0.337852	0.50716	2.49079	2.70287	CLSTN2	.
Mitochondrial Respiratory Chain Complex I Assembly (GO:0032981)	1/35	0.337852	0.50716	2.49079	2.70287	NDUFS1	.
Regulation of Cellular Senescence (GO:2000772)	1/35	0.337852	0.50716	2.49079	2.70287	NEK4	.
Double-Strand Break Repair (GO:0006302)	3/176	0.339489	0.509041	1.47084	1.58896	RAD50;PARP1;INTS3	.
Regulation of Cytosolic Calcium Ion Concentration (GO:0051480)	1/36	0.345613	0.512434	2.4195	2.57056	TTF2	.
Negative Regulation of Epithelial to Mesenchymal Transition (GO:0010719)	1/36	0.345613	0.512434	2.4195	2.57056	FBXO11	.
Negative Regulation of Plasma Membrane Bounded Cell Projection Assembly (GO:0120033)	1/36	0.345613	0.512434	2.4195	2.57056	CCP110	.
Peptidyl-Threonine Phosphorylation (GO:0018107)	1/36	0.345613	0.512434	2.4195	2.57056	PRKCA	.
Phosphatidic Acid Metabolic Process (GO:0046473)	1/36	0.345613	0.512434	2.4195	2.57056	DGKG	.
Cellular Response to Heat (GO:0034605)	1/36	0.345613	0.512434	2.4195	2.57056	PRKCA	.
Regulatory ncRNA Processing (GO:0070918)	1/36	0.345613	0.512434	2.4195	2.57056	AGO3	.
Positive Regulation of Epithelial Cell Migration (GO:0010634)	1/36	0.345613	0.512434	2.4195	2.57056	DOCK1	.
Establishment of Mitotic Spindle Localization (GO:0040001)	1/36	0.345613	0.512434	2.4195	2.57056	INPPL1	.
Glutamate Receptor Signaling Pathway (GO:0007215)	1/36	0.345613	0.512434	2.4195	2.57056	HOMER1	.
Regulation of Macroautophagy (GO:0016241)	2/106	0.352574	0.517923	1.62981	1.69906	IL4;PRKCA	.
Negative Regulation of Endothelial Cell Migration (GO:0010596)	1/37	0.353283	0.517923	2.35217	2.4474	SYNJ2BP	.
Anterograde Axonal Transport (GO:0008089)	1/37	0.353283	0.517923	2.35217	2.4474	BLOC1S5	.
Cardiac Muscle Cell Action Potential (GO:0086001)	1/37	0.353283	0.517923	2.35217	2.4474	SCN4B	.
Cardiac Muscle Cell Action Potential Involved in Contraction (GO:0086002)	1/37	0.353283	0.517923	2.35217	2.4474	SCN4B	.
Regulation of Sodium Ion Transport (GO:0002028)	1/37	0.353283	0.517923	2.35217	2.4474	SCN4B	.
Cellular Response to Glucose Stimulus (GO:0071333)	1/37	0.353283	0.517923	2.35217	2.4474	PRKCA	.
Protein N-linked Glycosylation via Asparagine (GO:0018279)	1/37	0.353283	0.517923	2.35217	2.4474	STT3B	.
Melanosome Organization (GO:0032438)	1/37	0.353283	0.517923	2.35217	2.4474	BLOC1S5	.
Positive Regulation of Intracellular Signal Transduction (GO:1902533)	9/652	0.354524	0.517923	1.18961	1.2336	THRB;PARP1;RTKN2;PRKCA;AMBRA1;EFNA5;ZNF268;CX3CL1;GDF7	.
Protein Catabolic Process (GO:0030163)	2/107	0.356804	0.517923	1.6142	1.66355	PRKCA;STT3B	.
Lipid Metabolic Process (GO:0006629)	4/259	0.359617	0.517923	1.33067	1.3609	DGKG;ACBD7;MECR;OCRL	.
Negative Regulation of Endothelial Cell Proliferation (GO:0001937)	1/38	0.360863	0.517923	2.28848	2.33255	SYNJ2BP	.
COPII-coated Vesicle Budding (GO:0090114)	1/38	0.360863	0.517923	2.28848	2.33255	KLHL12	.
Regulation of Erythrocyte Differentiation (GO:0045646)	1/38	0.360863	0.517923	2.28848	2.33255	LDB2	.
Regulation of Microtubule Cytoskeleton Organization (GO:0070507)	1/38	0.360863	0.517923	2.28848	2.33255	EFNA5	.
Regulation of Potassium Ion Transport (GO:0043266)	1/38	0.360863	0.517923	2.28848	2.33255	KCNIP1	.
Nuclear Transport (GO:0051169)	1/38	0.360863	0.517923	2.28848	2.33255	NUP133	.
Regulation of Sprouting Angiogenesis (GO:1903670)	1/38	0.360863	0.517923	2.28848	2.33255	SYNJ2BP	.
Striated Muscle Tissue Development (GO:0014706)	1/38	0.360863	0.517923	2.28848	2.33255	SGCD	.
Positive Regulation of Exocytosis (GO:0045921)	1/38	0.360863	0.517923	2.28848	2.33255	SMPD3	.
Glutathione Metabolic Process (GO:0006749)	1/38	0.360863	0.517923	2.28848	2.33255	GSTZ1	.
Heart Looping (GO:0001947)	1/38	0.360863	0.517923	2.28848	2.33255	DVL2	.
Positive Regulation of Receptor Signaling Pathway via JAK-STAT (GO:0046427)	1/38	0.360863	0.517923	2.28848	2.33255	TTF2	.
Protein K11-linked Ubiquitination (GO:0070979)	1/38	0.360863	0.517923	2.28848	2.33255	AREL1	.
mRNA Transcription by RNA Polymerase II (GO:0042789)	1/38	0.360863	0.517923	2.28848	2.33255	THRB	.
Male Meiotic Nuclear Division (GO:0007140)	1/38	0.360863	0.517923	2.28848	2.33255	RBM46	.
Maturation of SSU-rRNA (GO:0030490)	1/38	0.360863	0.517923	2.28848	2.33255	MPHOSPH10	.
Regulation of Axonogenesis (GO:0050770)	1/38	0.360863	0.517923	2.28848	2.33255	SIPA1L1	.
Cellular Response to Insulin Stimulus (GO:0032869)	2/108	0.361024	0.517923	1.59889	1.62897	PARP1;PIK3R3	.
Positive Regulation of Catabolic Process (GO:0009896)	3/183	0.361834	0.518525	1.41313	1.43655	AMBRA1;ZNF268;CDK16	.
Supramolecular Fiber Organization (GO:0097435)	5/339	0.364456	0.521399	1.2703	1.28217	PDZD2;NLRP5;INPPL1;WDR73;CKAP5	.
Inflammatory Response (GO:0006954)	4/261	0.364924	0.521399	1.32018	1.33083	IL4;GSDMC;AGTR1;CX3CL1	.
Negative Regulation of Cell Migration (GO:0030336)	3/184	0.365019	0.521399	1.40525	1.41622	IL4;SYNJ2BP;CX3CL1	.
SCF-dependent Proteasomal Ubiquitin-Dependent Protein Catabolic Process (GO:0031146)	1/39	0.368356	0.522231	2.22815	2.22526	CUL2	.
Base-Excision Repair (GO:0006284)	1/39	0.368356	0.522231	2.22815	2.22526	USP47	.
Phosphatidylinositol 3-Kinase/Protein Kinase B Signal Transduction (GO:0043491)	1/39	0.368356	0.522231	2.22815	2.22526	PIK3R3	.
Positive Regulation of SMAD Protein Signal Transduction (GO:0060391)	1/39	0.368356	0.522231	2.22815	2.22526	GDF7	.
Interstrand Cross-Link Repair (GO:0036297)	1/39	0.368356	0.522231	2.22815	2.22526	FANCC	.
Positive Regulation of Transferase Activity (GO:0051347)	1/39	0.368356	0.522231	2.22815	2.22526	AGTR1	.
Negative Regulation of G Protein-Coupled Receptor Signaling Pathway (GO:0045744)	1/39	0.368356	0.522231	2.22815	2.22526	RGS7	.
Negative Regulation of Gene Expression, Epigenetic (GO:0045814)	2/110	0.369433	0.523199	1.56913	1.56251	TASOR;EZH2	.
Negative Regulation of Proteolysis (GO:0045861)	1/40	0.37576	0.527097	2.1709	2.12489	TTF2	.
Regulation of Potassium Ion Transmembrane Transport (GO:1901379)	1/40	0.37576	0.527097	2.1709	2.12489	KCNIP1	.
Nucleic Acid Catabolic Process (GO:0141188)	1/40	0.37576	0.527097	2.1709	2.12489	RNASEH2B	.
Regulation of Protein Targeting to Mitochondrion (GO:1903214)	1/40	0.37576	0.527097	2.1709	2.12489	NPEPPS	.
Energy Derivation by Oxidation of Organic Compounds (GO:0015980)	1/40	0.37576	0.527097	2.1709	2.12489	NDUFS1	.
Establishment of Spindle Orientation (GO:0051294)	1/40	0.37576	0.527097	2.1709	2.12489	INPPL1	.
Positive Regulation of Stem Cell Population Maintenance (GO:1902459)	1/40	0.37576	0.527097	2.1709	2.12489	SMARCB1	.
Protein Monoubiquitination (GO:0006513)	1/40	0.37576	0.527097	2.1709	2.12489	KLHL12	.
Regulation of Apoptotic Signaling Pathway (GO:2001233)	1/40	0.37576	0.527097	2.1709	2.12489	CX3CL1	.
Regulation of Primary Metabolic Process (GO:0080090)	2/113	0.381964	0.532863	1.52648	1.46913	RBM12B;AFF2	.
Lipid Transport (GO:0006869)	2/113	0.381964	0.532863	1.52648	1.46913	PRELID2;ABCA12	.
Mitotic Cell Cycle Phase Transition (GO:0044772)	2/113	0.381964	0.532863	1.52648	1.46913	CUL2;RCC1	.
Regulation of Hippo Signaling (GO:0035330)	1/41	0.383078	0.532863	2.11652	2.03084	MOB3B	.
Regulation of Mitotic Spindle Organization (GO:0060236)	1/41	0.383078	0.532863	2.11652	2.03084	RCC1	.
Connective Tissue Development (GO:0061448)	1/41	0.383078	0.532863	2.11652	2.03084	SOX5	.
Positive Regulation of Insulin Secretion (GO:0032024)	1/41	0.383078	0.532863	2.11652	2.03084	PRKCA	.
T Cell Activation (GO:0042110)	2/114	0.386118	0.532863	1.51278	1.43958	IL4;PIK3R3	.
Positive Regulation of Wnt Signaling Pathway (GO:0030177)	2/114	0.386118	0.532863	1.51278	1.43958	USP47;PDZD2	.
Double-Strand Break Repair via Homologous Recombination (GO:0000724)	2/114	0.386118	0.532863	1.51278	1.43958	RAD50;INTS3	.
Transforming Growth Factor Beta Receptor Superfamily Signaling Pathway (GO:0141091)	2/114	0.386118	0.532863	1.51278	1.43958	SMAD5;GDF7	.
Negative Regulation of Cytokine Production (GO:0001818)	3/191	0.387228	0.532863	1.35245	1.28312	PRKCA;TTF2;CX3CL1	.
Positive Regulation of Inflammatory Response (GO:0050729)	2/115	0.390259	0.532863	1.49931	1.41077	AGTR1;CX3CL1	.
Acylglycerol Metabolic Process (GO:0006639)	1/42	0.390311	0.532863	2.0648	1.94258	DGKG	.
Blood Vessel Diameter Maintenance (GO:0097746)	1/42	0.390311	0.532863	2.0648	1.94258	AGTR1	.
Regulation of Receptor-Mediated Endocytosis (GO:0048259)	1/42	0.390311	0.532863	2.0648	1.94258	IL4	.
Cellular Response to Retinoic Acid (GO:0071300)	1/42	0.390311	0.532863	2.0648	1.94258	RORB	.
Determination of Heart Left/Right Asymmetry (GO:0061371)	1/42	0.390311	0.532863	2.0648	1.94258	DVL2	.
Positive Regulation of Double-Strand Break Repair via Homologous Recombination (GO:1905168)	1/42	0.390311	0.532863	2.0648	1.94258	PARP1	.
Embryonic Heart Tube Morphogenesis (GO:0003143)	1/42	0.390311	0.532863	2.0648	1.94258	DVL2	.
Positive Regulation of Neuron Differentiation (GO:0045666)	1/42	0.390311	0.532863	2.0648	1.94258	IMPACT	.
Heterophilic Cell-Cell Adhesion via Plasma Membrane Cell Adhesion Molecules (GO:0007157)	1/42	0.390311	0.532863	2.0648	1.94258	HMCN1	.
Positive Regulation of Receptor Signaling Pathway via STAT (GO:1904894)	1/42	0.390311	0.532863	2.0648	1.94258	TTF2	.
Potassium Ion Import Across Plasma Membrane (GO:1990573)	1/42	0.390311	0.532863	2.0648	1.94258	HCN1	.
Protein Destabilization (GO:0031648)	1/42	0.390311	0.532863	2.0648	1.94258	MTMR1	.
Regulation of Cellular Component Size (GO:0032535)	1/42	0.390311	0.532863	2.0648	1.94258	ARHGAP5	.
Antimicrobial Humoral Immune Response Mediated by Antimicrobial Peptide (GO:0061844)	2/116	0.394388	0.537644	1.48609	1.38268	TTF2;CX3CL1	.
DNA Recombination (GO:0006310)	1/43	0.39746	0.537644	2.01553	1.85966	RAD50	.
Negative Regulation of Organelle Assembly (GO:1902116)	1/43	0.39746	0.537644	2.01553	1.85966	CCP110	.
Regulation of Peptidyl-Tyrosine Phosphorylation (GO:0050730)	1/43	0.39746	0.537644	2.01553	1.85966	EFNA5	.
Non-Canonical Wnt Signaling Pathway (GO:0035567)	1/43	0.39746	0.537644	2.01553	1.85966	DVL2	.
Positive Regulation of Gene Expression, Epigenetic (GO:0141137)	1/43	0.39746	0.537644	2.01553	1.85966	SMARCB1	.
Positive Regulation of Monoatomic Ion Transport (GO:0043270)	1/43	0.39746	0.537644	2.01553	1.85966	SCN4B	.
Positive Regulation of Receptor-Mediated Endocytosis (GO:0048260)	1/43	0.39746	0.537644	2.01553	1.85966	IL4	.
mRNA Transcription (GO:0009299)	1/43	0.39746	0.537644	2.01553	1.85966	THRB	.
Organelle Organization (GO:0006996)	6/437	0.404146	0.541133	1.18055	1.06955	ARHGAP10;PARP1;VPS13C;DYM;WDR73;KIFAP3	.
Negative Regulation of Protein Modification Process (GO:0031400)	1/44	0.404525	0.541133	1.96856	1.78163	PTPN13	.
Regulation of Microtubule-Based Process (GO:0032886)	1/44	0.404525	0.541133	1.96856	1.78163	EFNA5	.
Bone Development (GO:0060348)	1/44	0.404525	0.541133	1.96856	1.78163	DYM	.
Peptidyl-Threonine Modification (GO:0018210)	1/44	0.404525	0.541133	1.96856	1.78163	PRKCA	.
Response to Amino Acid Starvation (GO:1990928)	1/44	0.404525	0.541133	1.96856	1.78163	IMPACT	.
Response to Unfolded Protein (GO:0006986)	1/44	0.404525	0.541133	1.96856	1.78163	STT3B	.
Positive Regulation of Cell Cycle G1/S Phase Transition (GO:1902808)	1/44	0.404525	0.541133	1.96856	1.78163	EZH2	.
Water-Soluble Vitamin Metabolic Process (GO:0006767)	1/44	0.404525	0.541133	1.96856	1.78163	SHMT1	.
Positive Regulation of Response to Biotic Stimulus (GO:0002833)	1/44	0.404525	0.541133	1.96856	1.78163	PRKCA	.
Positive Regulation of Wound Healing (GO:0090303)	1/44	0.404525	0.541133	1.96856	1.78163	TTF2	.
Negative Regulation of Signal Transduction (GO:0009968)	4/277	0.40724	0.544217	1.24179	1.11557	INPPL1;SMAD5;CX3CL1;RGS7	.
Ribonucleoprotein Complex Biogenesis (GO:0022613)	2/120	0.410775	0.54607	1.43542	1.2771	MPHOSPH10;ABCF1	.
Mitotic Sister Chromatid Segregation (GO:0000070)	2/120	0.410775	0.54607	1.43542	1.2771	LSM14A;DIS3L2	.
Positive Regulation of Cell-Matrix Adhesion (GO:0001954)	1/45	0.411507	0.54607	1.92372	1.70813	CX3CL1	.
Synaptic Vesicle Cycle (GO:0099504)	1/45	0.411507	0.54607	1.92372	1.70813	CDH2	.
Establishment of Protein Localization to Mitochondrion (GO:0072655)	1/45	0.411507	0.54607	1.92372	1.70813	PDZD2	.
Regulation of B Cell Proliferation (GO:0030888)	1/45	0.411507	0.54607	1.92372	1.70813	IL4	.
Negative Regulation of Biosynthetic Process (GO:0009890)	1/45	0.411507	0.54607	1.92372	1.70813	ASXL3	.
Negative Regulation of Defense Response (GO:0031348)	2/121	0.414838	0.54994	1.42328	1.2523	IL4;PARP1	.
Axonogenesis (GO:0007409)	3/200	0.415502	0.550271	1.29007	1.13302	EPHA5;DOCK7;EFNA5	.
Regulation of Interleukin-10 Production (GO:0032653)	1/46	0.418408	0.551368	1.88088	1.63881	IL4	.
Regulation of Intrinsic Apoptotic Signaling Pathway (GO:2001242)	1/46	0.418408	0.551368	1.88088	1.63881	RTKN2	.
T Cell Differentiation (GO:0030217)	1/46	0.418408	0.551368	1.88088	1.63881	PIK3R3	.
Regulation of Calcium-Mediated Signaling (GO:0050848)	1/46	0.418408	0.551368	1.88088	1.63881	PRKCA	.
Regulation of Cell-Cell Adhesion (GO:0022407)	1/46	0.418408	0.551368	1.88088	1.63881	EFNA5	.
Transcription Initiation at RNA Polymerase II Promoter (GO:0006367)	2/123	0.422922	0.552672	1.39962	1.20446	SMARCB1;MED17	.
Negative Regulation of Cold-Induced Thermogenesis (GO:0120163)	1/47	0.425228	0.552672	1.8399	1.57335	DOCK7	.
Regulation of Endothelial Cell Apoptotic Process (GO:2000351)	1/47	0.425228	0.552672	1.8399	1.57335	IL4	.
Regulation of mRNA Catabolic Process (GO:0061013)	1/47	0.425228	0.552672	1.8399	1.57335	PRKCA	.
Cell Surface Receptor Signaling Pathway via JAK-STAT (GO:0007259)	1/47	0.425228	0.552672	1.8399	1.57335	IL4	.
Cellular Defense Response (GO:0006968)	1/47	0.425228	0.552672	1.8399	1.57335	DCDC2	.
Regulation of Trans-Synaptic Signaling (GO:0099177)	1/47	0.425228	0.552672	1.8399	1.57335	SLC4A8	.
Cellular Response to Amino Acid Starvation (GO:0034198)	1/47	0.425228	0.552672	1.8399	1.57335	IMPACT	.
Chemokine-Mediated Signaling Pathway (GO:0070098)	1/47	0.425228	0.552672	1.8399	1.57335	CX3CL1	.
Positive Regulation of Chromosome Organization (GO:2001252)	1/47	0.425228	0.552672	1.8399	1.57335	RAD50	.
Stem Cell Differentiation (GO:0048863)	1/47	0.425228	0.552672	1.8399	1.57335	SMAD5	.
Positive Regulation of miRNA Transcription (GO:1902895)	1/47	0.425228	0.552672	1.8399	1.57335	TEAD1	.
Intracellular Glucose Homeostasis (GO:0001678)	1/47	0.425228	0.552672	1.8399	1.57335	PRKCA	.
Mitotic Spindle Assembly (GO:0090307)	1/47	0.425228	0.552672	1.8399	1.57335	LSM14A	.
Negative Regulation of Response to Biotic Stimulus (GO:0002832)	1/48	0.431969	0.558152	1.80066	1.51148	PARP1	.
Cellular Response to Chemokine (GO:1990869)	1/48	0.431969	0.558152	1.80066	1.51148	CX3CL1	.
Secondary Alcohol Metabolic Process (GO:1902652)	1/48	0.431969	0.558152	1.80066	1.51148	IL4	.
Positive Regulation of Osteoblast Differentiation (GO:0045669)	1/48	0.431969	0.558152	1.80066	1.51148	SMAD5	.
Positive Regulation of Peptide Hormone Secretion (GO:0090277)	1/48	0.431969	0.558152	1.80066	1.51148	PRKCA	.
Membrane Lipid Biosynthetic Process (GO:0046467)	1/48	0.431969	0.558152	1.80066	1.51148	CERS6	.
Regulation of Cell Motility (GO:2000145)	2/126	0.43494	0.561444	1.36555	1.13688	PDZD2;LDB2	.
Regulation of Wound Healing (GO:0061041)	1/49	0.438631	0.56166	1.76305	1.45293	TTF2	.
Positive Regulation of Epithelial to Mesenchymal Transition (GO:0010718)	1/49	0.438631	0.56166	1.76305	1.45293	EZH2	.
Positive Regulation of Smooth Muscle Cell Proliferation (GO:0048661)	1/49	0.438631	0.56166	1.76305	1.45293	CX3CL1	.
Protein Localization to Chromosome (GO:0034502)	1/49	0.438631	0.56166	1.76305	1.45293	PARP1	.
Proteoglycan Biosynthetic Process (GO:0030166)	1/49	0.438631	0.56166	1.76305	1.45293	CHST8	.
Protein Localization to Nucleus (GO:0034504)	2/127	0.438916	0.56166	1.35455	1.1154	NUP133;TNPO3	.
Monocarboxylic Acid Metabolic Process (GO:0032787)	2/127	0.438916	0.56166	1.35455	1.1154	ACBD7;MECR	.
Regulation of Anatomical Structure Morphogenesis (GO:0022603)	2/127	0.438916	0.56166	1.35455	1.1154	SIPA1L1;EFNA5	.
Negative Regulation of MAPK Cascade (GO:0043409)	2/127	0.438916	0.56166	1.35455	1.1154	PDZD2;SYNJ2BP	.
Regulation of Interleukin-2 Production (GO:0032663)	1/50	0.445215	0.564818	1.72699	1.39747	PRKCA	.
RNA Methylation (GO:0001510)	1/50	0.445215	0.564818	1.72699	1.39747	MRM2	.
Negative Regulation of Phosphorylation (GO:0042326)	1/50	0.445215	0.564818	1.72699	1.39747	PTPN13	.
Negative Regulation of Protein Binding (GO:0032091)	1/50	0.445215	0.564818	1.72699	1.39747	PDZD2	.
Nucleocytoplasmic Transport (GO:0006913)	1/50	0.445215	0.564818	1.72699	1.39747	NUP133	.
Positive Regulation of Blood Vessel Endothelial Cell Migration (GO:0043536)	1/50	0.445215	0.564818	1.72699	1.39747	PRKCA	.
Positive Regulation of Cell-Cell Adhesion (GO:0022409)	1/50	0.445215	0.564818	1.72699	1.39747	CX3CL1	.
Positive Regulation of Fat Cell Differentiation (GO:0045600)	1/50	0.445215	0.564818	1.72699	1.39747	CARM1	.
Lipid Modification (GO:0030258)	1/50	0.445215	0.564818	1.72699	1.39747	DGKG	.
Intracellular Monoatomic Cation Homeostasis (GO:0030003)	3/210	0.446415	0.565801	1.22712	0.989676	MECR;PRKCA;SMAD5	.
Positive Regulation of Defense Response (GO:0031349)	2/130	0.450752	0.56711	1.3226	1.0539	AGTR1;CX3CL1	.
Fatty Acid Metabolic Process (GO:0006631)	2/130	0.450752	0.56711	1.3226	1.0539	ACBD7;MECR	.
Regulation of Ubiquitin-Dependent Protein Catabolic Process (GO:2000058)	1/51	0.451722	0.56711	1.69236	1.3449	UBE3A	.
Response to Glucose (GO:0009749)	1/51	0.451722	0.56711	1.69236	1.3449	PRKCA	.
Positive Regulation of Actin Filament Bundle Assembly (GO:0032233)	1/51	0.451722	0.56711	1.69236	1.3449	CX3CL1	.
Epithelial to Mesenchymal Transition (GO:0001837)	1/51	0.451722	0.56711	1.69236	1.3449	TASOR	.
Transcription Initiation-Coupled Chromatin Remodeling (GO:0045815)	1/51	0.451722	0.56711	1.69236	1.3449	SMARCB1	.
Positive Regulation of Nervous System Development (GO:0051962)	1/51	0.451722	0.56711	1.69236	1.3449	CLSTN2	.
Insulin Receptor Signaling Pathway (GO:0008286)	1/51	0.451722	0.56711	1.69236	1.3449	PIK3R3	.
Negative Regulation of Cell Projection Organization (GO:0031345)	1/51	0.451722	0.56711	1.69236	1.3449	SPOCK1	.
Regulation of Tumor Necrosis Factor Production (GO:0032680)	2/131	0.454666	0.570266	1.31228	1.03433	IL4;CX3CL1	.
Regulation of Telomere Maintenance (GO:0032204)	1/52	0.458153	0.57245	1.65909	1.29501	RAD50	.
Glycoprotein Metabolic Process (GO:0009100)	1/52	0.458153	0.57245	1.65909	1.29501	STT3B	.
Proton Motive Force-Driven Mitochondrial ATP Synthesis (GO:0042776)	1/52	0.458153	0.57245	1.65909	1.29501	NDUFS1	.
Neuron Projection Guidance (GO:0097485)	2/132	0.458564	0.57245	1.30212	1.01521	EPHA5;EFNA5	.
Circulatory System Development (GO:0072359)	2/132	0.458564	0.57245	1.30212	1.01521	DVL2;KDM6A	.
Negative Regulation of Intracellular Signal Transduction (GO:1902532)	4/297	0.459299	0.572829	1.15584	0.899305	DGKG;PDZD2;RTKN2;EZH2	.
Negative Regulation of Protein Catabolic Process (GO:0042177)	1/53	0.464509	0.575541	1.6271	1.24762	PDZD2	.
Regulation of Proteolysis (GO:0030162)	1/53	0.464509	0.575541	1.6271	1.24762	TTF2	.
Nucleotide-Excision Repair (GO:0006289)	1/53	0.464509	0.575541	1.6271	1.24762	FANCC	.
Regulation of Smoothened Signaling Pathway (GO:0008589)	1/53	0.464509	0.575541	1.6271	1.24762	DCDC2	.
Positive Regulation of B Cell Activation (GO:0050871)	1/53	0.464509	0.575541	1.6271	1.24762	IL4	.
Cytoplasmic Microtubule Organization (GO:0031122)	1/53	0.464509	0.575541	1.6271	1.24762	WDR73	.
Positive Regulation of miRNA Metabolic Process (GO:2000630)	1/53	0.464509	0.575541	1.6271	1.24762	TEAD1	.
Potassium Ion Transmembrane Transport (GO:0071805)	2/134	0.466311	0.577234	1.28226	0.978241	KCNIP1;HCN1	.
Cellular Response to Oxygen-Containing Compound (GO:1901701)	5/384	0.467968	0.578746	1.11688	0.848107	CRTC1;SHMT1;RORB;CAMKK2;HCN1	.
Negative Regulation of Neuron Projection Development (GO:0010977)	1/54	0.470791	0.580613	1.59632	1.20257	SPOCK1	.
Regulation of Smooth Muscle Cell Proliferation (GO:0048660)	1/54	0.470791	0.580613	1.59632	1.20257	CX3CL1	.
Positive Regulation of Transcription Initiation by RNA Polymerase II (GO:0060261)	1/54	0.470791	0.580613	1.59632	1.20257	MED17	.
Protein Targeting (GO:0006605)	2/136	0.473993	0.583391	1.263	0.942905	PDZD2;VPS13C	.
Negative Regulation of Cell Differentiation (GO:0045596)	3/220	0.476666	0.583391	1.16997	0.866876	CHADL;RORB;FBXO11	.
RNA Modification (GO:0009451)	1/55	0.477	0.583391	1.56668	1.15972	MRM2	.
Regulation of Receptor Signaling Pathway via JAK-STAT (GO:0046425)	1/55	0.477	0.583391	1.56668	1.15972	TTF2	.
Cell Surface Receptor Signaling Pathway via STAT (GO:0097696)	1/55	0.477	0.583391	1.56668	1.15972	IL4	.
Dicarboxylic Acid Metabolic Process (GO:0043648)	1/55	0.477	0.583391	1.56668	1.15972	SHMT1	.
Striated Muscle Contraction (GO:0006941)	1/55	0.477	0.583391	1.56668	1.15972	SCN4B	.
Positive Regulation of Telomere Maintenance (GO:0032206)	1/55	0.477	0.583391	1.56668	1.15972	RAD50	.
Regulation of Alternative mRNA Splicing, via Spliceosome (GO:0000381)	1/55	0.477	0.583391	1.56668	1.15972	RBFOX1	.
Adenylate Cyclase-Inhibiting G Protein-Coupled Receptor Signaling Pathway (GO:0007193)	1/56	0.483136	0.587645	1.53812	1.11892	PRKCA	.
Regulation of Proteasomal Protein Catabolic Process (GO:0061136)	1/56	0.483136	0.587645	1.53812	1.11892	PRKCA	.
Nucleosome Assembly (GO:0006334)	1/56	0.483136	0.587645	1.53812	1.11892	SUPT16H	.
Regulation of Stem Cell Population Maintenance (GO:2000036)	1/56	0.483136	0.587645	1.53812	1.11892	SMARCB1	.
Cellular Response to Alcohol (GO:0097306)	1/56	0.483136	0.587645	1.53812	1.11892	NFE2L1	.
Positive Regulation of DNA Recombination (GO:0045911)	1/56	0.483136	0.587645	1.53812	1.11892	PARP1	.
Inorganic Cation Transmembrane Transport (GO:0098662)	4/307	0.484762	0.589083	1.11712	0.808903	SLC4A8;RHBG;SCN4B;HCN1	.
Negative Regulation of Cell Motility (GO:2000146)	2/139	0.48539	0.589308	1.23515	0.892768	PDZD2;CX3CL1	.
Intracellular Calcium Ion Homeostasis (GO:0006874)	2/140	0.489156	0.591228	1.22614	0.87678	PACS2;TTF2	.
Negative Regulation of Innate Immune Response (GO:0045824)	1/57	0.4892	0.591228	1.51058	1.08004	PARP1	.
Cartilage Development (GO:0051216)	1/57	0.4892	0.591228	1.51058	1.08004	SOX5	.
Positive Regulation of Protein Localization to Cell Periphery (GO:1904377)	1/57	0.4892	0.591228	1.51058	1.08004	EPB41L2	.
Regulation of Blood Vessel Endothelial Cell Migration (GO:0043535)	1/57	0.4892	0.591228	1.51058	1.08004	PRKCA	.
Sprouting Angiogenesis (GO:0002040)	1/58	0.495193	0.596299	1.484	1.04296	PIK3R3	.
Sterol Metabolic Process (GO:0016125)	1/58	0.495193	0.596299	1.484	1.04296	IL4	.
Muscle Organ Development (GO:0007517)	1/58	0.495193	0.596299	1.484	1.04296	SGCD	.
Regulation of Calcium Ion Transport (GO:0051924)	1/58	0.495193	0.596299	1.484	1.04296	HOMER1	.
Regulation of Cell Adhesion (GO:0030155)	2/142	0.496634	0.597492	1.2085	0.84583	PRKCA;EFNA5	.
Positive Regulation of Cell Population Proliferation (GO:0008284)	6/484	0.500768	0.598544	1.06188	0.73441	IL4;RTKN2;MVD;ZNF268;CX3CL1;EZH2	.
Regulation of Transcription Initiation by RNA Polymerase II (GO:0060260)	1/59	0.501117	0.598544	1.45834	1.00759	MED17	.
Renal System Development (GO:0072001)	1/59	0.501117	0.598544	1.45834	1.00759	AGTR1	.
Positive Regulation of DNA-templated Transcription Initiation (GO:2000144)	1/59	0.501117	0.598544	1.45834	1.00759	MED17	.
Response to Interleukin-1 (GO:0070555)	1/59	0.501117	0.598544	1.45834	1.00759	PRKCA	.
Homophilic Cell Adhesion via Plasma Membrane Adhesion Molecules (GO:0007156)	1/59	0.501117	0.598544	1.45834	1.00759	HMCN1	.
mRNA Transport (GO:0051028)	1/59	0.501117	0.598544	1.45834	1.00759	NUP133	.
Proton Motive Force-Driven ATP Synthesis (GO:0015986)	1/59	0.501117	0.598544	1.45834	1.00759	NDUFS1	.
Regulation of Autophagy (GO:0010506)	3/230	0.506136	0.601207	1.11786	0.761203	PRKCA;AMBRA1;CDK16	.
Negative Regulation of Intrinsic Apoptotic Signaling Pathway (GO:2001243)	1/60	0.506971	0.601207	1.43355	0.973812	RTKN2	.
RNA Polymerase II Preinitiation Complex Assembly (GO:0051123)	1/60	0.506971	0.601207	1.43355	0.973812	MED17	.
Oxidative Phosphorylation (GO:0006119)	1/60	0.506971	0.601207	1.43355	0.973812	NDUFS1	.
Response to Reactive Oxygen Species (GO:0000302)	1/60	0.506971	0.601207	1.43355	0.973812	CAMKK2	.
Response to Retinoic Acid (GO:0032526)	1/60	0.506971	0.601207	1.43355	0.973812	RORB	.
Positive Regulation of Cell Cycle (GO:0045787)	1/60	0.506971	0.601207	1.43355	0.973812	PRKCA	.
Protein Targeting to Mitochondrion (GO:0006626)	1/60	0.506971	0.601207	1.43355	0.973812	PDZD2	.
mRNA Export From Nucleus (GO:0006406)	1/61	0.512757	0.607525	1.40959	0.941537	NUP133	.
Antimicrobial Humoral Response (GO:0019730)	2/147	0.515023	0.609666	1.16653	0.774042	TTF2;CX3CL1	.
ATP Metabolic Process (GO:0046034)	1/62	0.518475	0.61157	1.38641	0.91068	PARP1	.
Regulation of Phagocytosis (GO:0050764)	1/62	0.518475	0.61157	1.38641	0.91068	PRKCA	.
Cellular Response to Light Stimulus (GO:0071482)	1/62	0.518475	0.61157	1.38641	0.91068	PARP1	.
protein-DNA Complex Assembly (GO:0065004)	1/62	0.518475	0.61157	1.38641	0.91068	SUPT16H	.
Negative Regulation of Metabolic Process (GO:0009892)	1/63	0.524126	0.616046	1.36398	0.881159	DOCK7	.
Canonical Wnt Signaling Pathway (GO:0060070)	1/63	0.524126	0.616046	1.36398	0.881159	DVL2	.
Transcription Preinitiation Complex Assembly (GO:0070897)	1/63	0.524126	0.616046	1.36398	0.881159	MED17	.
Positive Regulation of Peptidyl-Tyrosine Phosphorylation (GO:0050731)	1/63	0.524126	0.616046	1.36398	0.881159	EFNA5	.
Cellular Response to Growth Factor Stimulus (GO:0071363)	2/150	0.525842	0.617516	1.14271	0.734479	KIDINS220;SOX5	.
Protein Localization to Organelle (GO:0033365)	2/151	0.529413	0.618774	1.13498	0.721833	IFT140;BBS9	.
Aerobic Electron Transport Chain (GO:0019646)	1/64	0.529712	0.618774	1.34226	0.852901	NDUFS1	.
Positive Regulation of Neurogenesis (GO:0050769)	1/64	0.529712	0.618774	1.34226	0.852901	CX3CL1	.
Positive Regulation of Phagocytosis (GO:0050766)	1/64	0.529712	0.618774	1.34226	0.852901	PRKCA	.
Granulocyte Chemotaxis (GO:0071621)	1/64	0.529712	0.618774	1.34226	0.852901	CX3CL1	.
Protein N-linked Glycosylation (GO:0006487)	1/64	0.529712	0.618774	1.34226	0.852901	STT3B	.
Axon Guidance (GO:0007411)	2/152	0.532965	0.620308	1.12736	0.709445	EPHA5;EFNA5	.
Regulation of Endocytosis (GO:0030100)	1/65	0.535232	0.620308	1.32122	0.825835	RAB4A	.
Chloride Transmembrane Transport (GO:1902476)	1/65	0.535232	0.620308	1.32122	0.825835	SLC4A8	.
Positive Regulation of T Cell Proliferation (GO:0042102)	1/65	0.535232	0.620308	1.32122	0.825835	IL4	.
Positive Regulation of Cell Junction Assembly (GO:1901890)	1/65	0.535232	0.620308	1.32122	0.825835	CLSTN2	.
Fat Cell Differentiation (GO:0045444)	1/65	0.535232	0.620308	1.32122	0.825835	BBS9	.
Positive Regulation of Organelle Assembly (GO:1902117)	1/65	0.535232	0.620308	1.32122	0.825835	CCP110	.
Protein Autoubiquitination (GO:0051865)	1/65	0.535232	0.620308	1.32122	0.825835	UBE3A	.
Mitochondrial ATP Synthesis Coupled Electron Transport (GO:0042775)	1/65	0.535232	0.620308	1.32122	0.825835	NDUFS1	.
Positive Regulation of ERK1 and ERK2 Cascade (GO:0070374)	2/153	0.536499	0.621234	1.11983	0.69731	PRKCA;CX3CL1	.
Negative Regulation of Response to External Stimulus (GO:0032102)	2/154	0.540014	0.624449	1.11241	0.685422	IL4;PARP1	.
Regulation of miRNA Transcription (GO:1902893)	1/66	0.540687	0.624449	1.30083	0.799896	TEAD1	.
Negative Regulation of Binding (GO:0051100)	1/66	0.540687	0.624449	1.30083	0.799896	PDZD2	.
RNA Export From Nucleus (GO:0006405)	1/67	0.546079	0.62958	1.28105	0.775025	NUP133	.
Regulation of Protein Serine/Threonine Kinase Activity (GO:0071900)	1/67	0.546079	0.62958	1.28105	0.775025	EZH2	.
Action Potential (GO:0001508)	1/68	0.551408	0.635172	1.26187	0.751165	SCN4B	.
Cell Junction Organization (GO:0034330)	1/69	0.556674	0.639573	1.24325	0.728263	PDZD2	.
Regulation of Translational Initiation (GO:0006446)	1/69	0.556674	0.639573	1.24325	0.728263	IMPACT	.
Phospholipid Metabolic Process (GO:0006644)	1/69	0.556674	0.639573	1.24325	0.728263	SMPD3	.
Skeletal System Development (GO:0001501)	2/160	0.560719	0.643663	1.06984	0.618939	DYM;SOX5	.
Negative Regulation of Immune Response (GO:0050777)	1/70	0.561879	0.64388	1.22517	0.70627	PARP1	.
Peptidyl-Serine Phosphorylation (GO:0018105)	1/70	0.561879	0.64388	1.22517	0.70627	PRKCA	.
Phagocytosis (GO:0006909)	1/71	0.567023	0.647538	1.2076	0.68514	DOCK1	.
Cellular Response to Reactive Oxygen Species (GO:0034614)	1/71	0.567023	0.647538	1.2076	0.68514	CAMKK2	.
Response to Ionizing Radiation (GO:0010212)	1/71	0.567023	0.647538	1.2076	0.68514	INTS3	.
Positive Regulation of Protein Polymerization (GO:0032273)	1/71	0.567023	0.647538	1.2076	0.68514	AMBRA1	.
Kidney Development (GO:0001822)	1/72	0.572107	0.652221	1.19053	0.664829	AGTR1	.
Monoatomic Anion Transmembrane Transport (GO:0098656)	1/72	0.572107	0.652221	1.19053	0.664829	SLC4A8	.
Cytokine-Mediated Signaling Pathway (GO:0019221)	3/255	0.575819	0.655696	1.00567	0.55509	IL4;PRKCA;CX3CL1	.
Negative Regulation of Epithelial Cell Proliferation (GO:0050680)	1/73	0.577131	0.655696	1.17394	0.645297	SYNJ2BP	.
Regulation of MAP Kinase Activity (GO:0043405)	1/73	0.577131	0.655696	1.17394	0.645297	EZH2	.
Negative Regulation of Cellular Response to Growth Factor Stimulus (GO:0090288)	1/73	0.577131	0.655696	1.17394	0.645297	IL4	.
Positive Regulation of Cytoskeleton Organization (GO:0051495)	1/74	0.582097	0.660772	1.1578	0.626506	CX3CL1	.
Regulation of Fat Cell Differentiation (GO:0045598)	1/75	0.587005	0.664071	1.14209	0.60842	CARM1	.
Peptidyl-Serine Modification (GO:0018209)	1/75	0.587005	0.664071	1.14209	0.60842	PRKCA	.
Positive Regulation of Protein Localization to Nucleus (GO:1900182)	1/75	0.587005	0.664071	1.14209	0.60842	TTF2	.
Positive Regulation of Protein Serine/Threonine Kinase Activity (GO:0071902)	1/75	0.587005	0.664071	1.14209	0.60842	EZH2	.
Negative Regulation of Supramolecular Fiber Organization (GO:1902904)	1/76	0.591855	0.665022	1.12681	0.591005	CHADL	.
Regulation of Neuron Differentiation (GO:0045664)	1/76	0.591855	0.665022	1.12681	0.591005	IMPACT	.
Transforming Growth Factor Beta Receptor Signaling Pathway (GO:0007179)	1/76	0.591855	0.665022	1.12681	0.591005	SMAD5	.
Glycoprotein Biosynthetic Process (GO:0009101)	1/76	0.591855	0.665022	1.12681	0.591005	CHST8	.
Positive Regulation of Protein Secretion (GO:0050714)	1/76	0.591855	0.665022	1.12681	0.591005	PRKCA	.
Positive Regulation of Protein Ubiquitination (GO:0031398)	1/76	0.591855	0.665022	1.12681	0.591005	UBE3A	.
Regulation of Notch Signaling Pathway (GO:0008593)	1/76	0.591855	0.665022	1.12681	0.591005	SYNJ2BP	.
Regulation of Rho Protein Signal Transduction (GO:0035023)	1/76	0.591855	0.665022	1.12681	0.591005	DOCK7	.
Brain Development (GO:0007420)	2/170	0.593733	0.666569	1.00564	0.524267	UBE3A;AFF2	.
Cellular Response to UV (GO:0034644)	1/77	0.596648	0.66871	1.11193	0.57423	PARP1	.
Positive Regulation of Lymphocyte Proliferation (GO:0050671)	1/77	0.596648	0.66871	1.11193	0.57423	IL4	.
Positive Regulation of Macromolecule Biosynthetic Process (GO:0010557)	4/355	0.599133	0.670927	0.961972	0.492792	IL4;RNF207;PIK3R3;LDB2	.
Nitrogen Compound Transport (GO:0071705)	2/172	0.600111	0.671456	0.993712	0.50743	SCAMP1;RHBG	.
Regulation of Protein Binding (GO:0043393)	1/78	0.601386	0.672316	1.09743	0.558064	PDZD2	.
Positive Regulation of Growth (GO:0045927)	1/79	0.606068	0.67641	1.08331	0.54248	TEAD1	.
Positive Regulation of Protein Modification by Small Protein Conjugation or Removal (GO:1903322)	1/79	0.606068	0.67641	1.08331	0.54248	UBE3A	.
Regulation of Double-Strand Break Repair via Homologous Recombination (GO:0010569)	1/80	0.610695	0.678152	1.06954	0.527451	PARP1	.
Regulation of mRNA Stability (GO:0043488)	1/80	0.610695	0.678152	1.06954	0.527451	PRKCA	.
Cholesterol Homeostasis (GO:0042632)	1/80	0.610695	0.678152	1.06954	0.527451	NFE2L1	.
Response to Tumor Necrosis Factor (GO:0034612)	1/80	0.610695	0.678152	1.06954	0.527451	ZNF268	.
Proteolysis Involved in Protein Catabolic Process (GO:0051603)	1/80	0.610695	0.678152	1.06954	0.527451	UBC	.
Regulation of TOR Signaling (GO:0032006)	1/80	0.610695	0.678152	1.06954	0.527451	TBCK	.
Positive Regulation of MAPK Cascade (GO:0043410)	4/362	0.614511	0.679817	0.942822	0.459087	DVL2;PRKCA;CX3CL1;EZH2	.
Negative Regulation of Neuron Apoptotic Process (GO:0043524)	1/81	0.615268	0.679817	1.05612	0.512952	CX3CL1	.
Aerobic Respiration (GO:0009060)	1/81	0.615268	0.679817	1.05612	0.512952	NDUFS1	.
Positive Regulation of JNK Cascade (GO:0046330)	1/81	0.615268	0.679817	1.05612	0.512952	DVL2	.
Sterol Homeostasis (GO:0055092)	1/81	0.615268	0.679817	1.05612	0.512952	NFE2L1	.
Regulation of Catabolic Process (GO:0009894)	1/81	0.615268	0.679817	1.05612	0.512952	UBE3A	.
Regulation of Interleukin-1 Beta Production (GO:0032651)	1/82	0.619788	0.681972	1.04302	0.49896	CX3CL1	.
Regulation of Vesicle-Mediated Transport (GO:0060627)	1/82	0.619788	0.681972	1.04302	0.49896	RAB4A	.
Response to Insulin (GO:0032868)	1/82	0.619788	0.681972	1.04302	0.49896	PARP1	.
Inorganic Anion Transmembrane Transport (GO:0098661)	1/82	0.619788	0.681972	1.04302	0.49896	SLC4A8	.
Negative Regulation of Blood Vessel Morphogenesis (GO:2000181)	1/82	0.619788	0.681972	1.04302	0.49896	SYNJ2BP	.
Negative Regulation of Protein Phosphorylation (GO:0001933)	1/83	0.624255	0.684616	1.03025	0.485452	PTPN13	.
Regulation of Protein Kinase Activity (GO:0045859)	1/83	0.624255	0.684616	1.03025	0.485452	CAMKK2	.
Organophosphate Metabolic Process (GO:0019637)	1/83	0.624255	0.684616	1.03025	0.485452	OCRL	.
Regulation of T Cell Proliferation (GO:0042129)	1/83	0.624255	0.684616	1.03025	0.485452	IL4	.
Cytoskeleton-Dependent Cytokinesis (GO:0061640)	1/84	0.628669	0.68662	1.01779	0.472407	SEPTIN7	.
Vascular Transport (GO:0010232)	1/84	0.628669	0.68662	1.01779	0.472407	SLC4A8	.
Positive Regulation of Synaptic Transmission (GO:0050806)	1/84	0.628669	0.68662	1.01779	0.472407	CLSTN2	.
+ Reg of Transmembrane Receptor Prot Serine/Threonine Kinase Sgnlng Pway (GO:0090100)	1/84	0.628669	0.68662	1.01779	0.472407	GDF7	.
Monoatomic Cation Homeostasis (GO:0055080)	1/84	0.628669	0.68662	1.01779	0.472407	HEPH	.
Actomyosin Structure Organization (GO:0031032)	1/85	0.633032	0.688552	1.00562	0.459804	EPB41L2	.
Negative Regulation of Transforming Growth Factor Beta Receptor Signaling Pathway (GO:0030512)	1/85	0.633032	0.688552	1.00562	0.459804	PDZD2	.
Carbohydrate Metabolic Process (GO:0005975)	1/85	0.633032	0.688552	1.00562	0.459804	GLO1	.
Cellular Respiration (GO:0045333)	1/85	0.633032	0.688552	1.00562	0.459804	NDUFS1	.
Ribosomal Small Subunit Biogenesis (GO:0042274)	1/85	0.633032	0.688552	1.00562	0.459804	MPHOSPH10	.
Regulation of Innate Immune Response (GO:0045088)	1/86	0.637344	0.691541	0.993739	0.447626	PARP1	.
Transport Across Blood-Brain Barrier (GO:0150104)	1/86	0.637344	0.691541	0.993739	0.447626	SLC4A8	.
Integrin-Mediated Signaling Pathway (GO:0007229)	1/86	0.637344	0.691541	0.993739	0.447626	DOCK1	.
Cellular Response to Tumor Necrosis Factor (GO:0071356)	1/87	0.641605	0.694462	0.982134	0.435854	ZNF268	.
Positive Regulation of Biosynthetic Process (GO:0009891)	1/87	0.641605	0.694462	0.982134	0.435854	TTF2	.
Synapse Assembly (GO:0007416)	1/87	0.641605	0.694462	0.982134	0.435854	CDH2	.
Positive Regulation of Endothelial Cell Migration (GO:0010595)	1/88	0.645817	0.697882	0.970796	0.42447	PRKCA	.
Positive Regulation of Protein Kinase Activity (GO:0045860)	1/88	0.645817	0.697882	0.970796	0.42447	EZH2	.
Cellular Response to Hormone Stimulus (GO:0032870)	1/89	0.649979	0.701808	0.959715	0.41346	THRB	.
Anterograde Trans-Synaptic Signaling (GO:0098916)	2/189	0.651288	0.702079	0.902591	0.387034	HOMER1;KCNIP1	.
Macromolecule Biosynthetic Process (GO:0009059)	2/189	0.651288	0.702079	0.902591	0.387034	FARSB;ABCF1	.
Chloride Transport (GO:0006821)	1/90	0.654092	0.702818	0.948884	0.402807	SLC4A8	.
Positive Regulation of Plasma Membrane Bounded Cell Projection Assembly (GO:0120034)	1/90	0.654092	0.702818	0.948884	0.402807	CCP110	.
Protein Dephosphorylation (GO:0006470)	1/90	0.654092	0.702818	0.948884	0.402807	PTPN13	.
Mitochondrial Respiratory Chain Complex Assembly (GO:0033108)	1/90	0.654092	0.702818	0.948884	0.402807	NDUFS1	.
ERAD Pathway (GO:0036503)	1/91	0.658158	0.706614	0.938293	0.392498	STT3B	.
Cellular Response to Cytokine Stimulus (GO:0071345)	3/289	0.660165	0.708064	0.88457	0.367331	PRKCA;ZNF268;CX3CL1	.
RNA Splicing (GO:0008380)	1/92	0.662176	0.708064	0.927935	0.382517	MPHOSPH10	.
Sensory Perception of Mechanical Stimulus (GO:0050954)	1/92	0.662176	0.708064	0.927935	0.382517	DCDC2	.
Positive Regulation of Cell Adhesion (GO:0045785)	1/92	0.662176	0.708064	0.927935	0.382517	PRKCA	.
Positive Regulation of Response to Stimulus (GO:0048584)	1/92	0.662176	0.708064	0.927935	0.382517	HOMER1	.
Negative Regulation of Angiogenesis (GO:0016525)	1/93	0.666146	0.711736	0.917802	0.372853	SYNJ2BP	.
Cellular Response to Peptide Hormone Stimulus (GO:0071375)	1/94	0.670071	0.714778	0.907887	0.363492	PARP1	.
Lipid Biosynthetic Process (GO:0008610)	1/94	0.670071	0.714778	0.907887	0.363492	MVD	.
Response to Endoplasmic Reticulum Stress (GO:0034976)	2/196	0.670802	0.714983	0.869712	0.34726	ATG10;STT3B	.
Response to Calcium Ion (GO:0051592)	1/95	0.673949	0.717761	0.898183	0.354423	HOMER1	.
Sensory Perception of Sound (GO:0007605)	1/96	0.677782	0.721265	0.888683	0.345635	DCDC2	.
Regulation of mRNA Splicing, via Spliceosome (GO:0048024)	1/97	0.68157	0.723555	0.879381	0.337116	RBFOX1	.
Inorganic Cation Import Across Plasma Membrane (GO:0098659)	1/97	0.68157	0.723555	0.879381	0.337116	HCN1	.
Muscle Contraction (GO:0006936)	1/97	0.68157	0.723555	0.879381	0.337116	KCNIP1	.
Defense Response to Gram-positive Bacterium (GO:0050830)	1/98	0.685314	0.726367	0.870271	0.328856	DROSHA	.
Positive Regulation of Supramolecular Fiber Organization (GO:1902905)	1/98	0.685314	0.726367	0.870271	0.328856	CX3CL1	.
Positive Regulation of Protein Catabolic Process (GO:0045732)	1/99	0.689014	0.729706	0.861347	0.320846	ZNF268	.
Positive Regulation of Canonical NF-kappaB Signal Transduction (GO:0043123)	2/204	0.692015	0.7323	0.834927	0.307376	PARP1;CX3CL1	.
Response to UV (GO:0009411)	1/100	0.692671	0.732409	0.852603	0.313077	PARP1	.
Monoatomic Cation Transmembrane Transport (GO:0098655)	3/304	0.693327	0.732519	0.839841	0.307595	SLC4A8;SCN4B;HCN1	.
Sensory Perception of Light Stimulus (GO:0050953)	1/101	0.696284	0.733892	0.844034	0.305538	FSCN2	.
Visual Perception (GO:0007601)	1/101	0.696284	0.733892	0.844034	0.305538	FSCN2	.
Hemopoiesis (GO:0030097)	1/101	0.696284	0.733892	0.844034	0.305538	RTKN2	.
Positive Regulation of Protein Localization (GO:1903829)	1/102	0.699856	0.73707	0.835635	0.298222	TTF2	.
Regulation of RNA Splicing (GO:0043484)	1/104	0.706874	0.743871	0.819326	0.284227	RBM12B	.
Regulation of Angiogenesis (GO:0045765)	2/211	0.709644	0.745725	0.806674	0.276682	PRKCA;SYNJ2BP	.
Organic Anion Transport (GO:0015711)	1/105	0.710321	0.745725	0.811406	0.277532	SLC4A8	.
Positive Regulation of NF-kappaB Transcription Factor Activity (GO:0051092)	1/105	0.710321	0.745725	0.811406	0.277532	RTKN2	.
Protein Stabilization (GO:0050821)	2/212	0.712093	0.746994	0.802791	0.272585	PDZD2;DSG1	.
Axon Development (GO:0061564)	1/107	0.717096	0.750462	0.796016	0.264712	DOCK7	.
Dephosphorylation (GO:0016311)	1/107	0.717096	0.750462	0.796016	0.264712	PTPN13	.
Positive Regulation of Cell Growth (GO:0030307)	1/107	0.717096	0.750462	0.796016	0.264712	TEAD1	.
Positive Regulation of DNA Metabolic Process (GO:0051054)	1/108	0.720423	0.753351	0.788536	0.258574	RAD50	.
Regulation of Canonical Wnt Signaling Pathway (GO:0060828)	2/216	0.721717	0.754109	0.787625	0.256862	USP47;PDZD2	.
Positive Regulation of Vasculature Development (GO:1904018)	1/109	0.723712	0.755599	0.781195	0.252608	PRKCA	.
Protein Metabolic Process (GO:0019538)	6/614	0.727813	0.759283	0.829207	0.263448	NPEPPS;PARP1;UBE3A;FBXO11;FARSB;ABCF1	.
Negative Regulation of Developmental Process (GO:0051093)	1/111	0.730175	0.761148	0.766914	0.241172	PARP1	.
Endoplasmic Reticulum to Golgi Vesicle-Mediated Transport (GO:0006888)	1/112	0.733349	0.762676	0.759966	0.235691	KLHL12	.
Regulation of Wnt Signaling Pathway (GO:0030111)	1/112	0.733349	0.762676	0.759966	0.235691	DCDC2	.
Defense Response to Bacterium (GO:0042742)	2/221	0.733365	0.762676	0.769446	0.238615	GSDMC;DROSHA	.
Regulation of Protein Ubiquitination (GO:0031396)	1/113	0.736487	0.765323	0.753142	0.230359	UBE3A	.
Intracellular Protein Transport (GO:0006886)	3/326	0.737482	0.765758	0.781754	0.238055	NUP133;VPS13C;TNPO3	.
Regulation of Interleukin-6 Production (GO:0032675)	1/114	0.739587	0.767343	0.746439	0.225173	CX3CL1	.
Negative Regulation of Growth (GO:0045926)	1/115	0.742652	0.76872	0.739854	0.220128	GNG4	.
Intrinsic Apoptotic Signaling Pathway (GO:0097193)	1/115	0.742652	0.76872	0.739854	0.220128	CUL2	.
Regulation of JNK Cascade (GO:0046328)	1/115	0.742652	0.76872	0.739854	0.220128	DVL2	.
Protein Complex Oligomerization (GO:0051259)	1/116	0.74568	0.771253	0.733383	0.215218	HOMER1	.
Negative Regulation of Cellular Process (GO:0048523)	5/531	0.747716	0.772757	0.798645	0.232192	PBRM1;PDZD2;GNG4;ZNF268;DIS3L2	.
Cytoskeleton Organization (GO:0007010)	1/117	0.748673	0.773143	0.727024	0.210439	ARHGAP10	.
Positive Regulation of Epithelial Cell Proliferation (GO:0050679)	1/118	0.751631	0.775594	0.720773	0.205788	PRKCA	.
MAPK Cascade (GO:0000165)	1/119	0.754554	0.778005	0.714629	0.20126	CAMKK2	.
Regulation of Transforming Growth Factor Beta Receptor Signaling Pathway (GO:0017015)	1/120	0.757443	0.779269	0.708587	0.196851	PDZD2	.
Negative Regulation of Catabolic Process (GO:0009895)	1/120	0.757443	0.779269	0.708587	0.196851	PDZD2	.
Apoptotic Process (GO:0006915)	2/232	0.757541	0.779269	0.732234	0.203325	PARP1;EFNA5	.
Negative Regulation of Inflammatory Response (GO:0050728)	1/121	0.760298	0.78029	0.702647	0.192557	IL4	.
Enzyme-Linked Receptor Protein Signaling Pathway (GO:0007167)	1/121	0.760298	0.78029	0.702647	0.192557	DOK6	.
Negative Regulation of Cell Growth (GO:0030308)	1/121	0.760298	0.78029	0.702647	0.192557	GNG4	.
- Reg of Transmembrane Receptor Prot Serine/Threonine Kinase Sgnlng Pway (GO:0090101)	1/122	0.763119	0.782581	0.696804	0.188375	PDZD2	.
Response to Cytokine (GO:0034097)	1/123	0.765908	0.784834	0.691057	0.184301	PRKCA	.
Positive Regulation of Angiogenesis (GO:0045766)	1/126	0.774079	0.792594	0.674369	0.172694	PRKCA	.
Potassium Ion Transport (GO:0006813)	1/127	0.776739	0.794705	0.668983	0.169019	HCN1	.
Golgi Organization (GO:0007030)	1/128	0.779368	0.79678	0.663682	0.165438	DYM	.
Regulation of Neuron Apoptotic Process (GO:0043523)	1/129	0.781966	0.798821	0.658463	0.161945	SIGMAR1	.
Protein Localization to Plasma Membrane (GO:0072659)	1/132	0.789578	0.805977	0.643285	0.15198	PACS2	.
Protein Localization to Cell Periphery (GO:1990778)	1/136	0.799318	0.815292	0.624098	0.139796	PACS2	.
protein-RNA Complex Assembly (GO:0022618)	1/138	0.804019	0.819457	0.614924	0.134135	AGO3	.
Protein Autophosphorylation (GO:0046777)	1/140	0.808609	0.823503	0.606015	0.128741	CAMKK2	.
Chemical Synaptic Transmission (GO:0007268)	2/260	0.810706	0.824534	0.651831	0.136787	HOMER1;KCNIP1	.
Cellular Response to Starvation (GO:0009267)	1/141	0.810864	0.824534	0.601655	0.12614	IMPACT	.
Protein Localization (GO:0008104)	3/371	0.812054	0.825112	0.684571	0.142519	PACS2;LRBA;SEPTIN7	.
Protein Glycosylation (GO:0006486)	1/145	0.819623	0.832165	0.584824	0.116328	STT3B	.
Negative Regulation of Cell Population Proliferation (GO:0008285)	3/379	0.82326	0.835218	0.669729	0.130251	PBRM1;ZNF268;DIS3L2	.
Regulation of Canonical NF-kappaB Signal Transduction (GO:0043122)	2/270	0.827028	0.838401	0.627187	0.119113	PARP1;CX3CL1	.
Phosphate-Containing Compound Metabolic Process (GO:0006796)	1/150	0.830005	0.840776	0.565055	0.105283	OCRL	.
Membrane Organization (GO:0061024)	1/173	0.870605	0.88123	0.488921	0.0677485	OCRL	.
Protein Transport (GO:0015031)	2/308	0.878123	0.888162	0.548231	0.0712529	ABCA12;SCAMP1	.
Metal Ion Transport (GO:0030001)	1/180	0.880925	0.890318	0.469633	0.0595416	SCN4B	.
Positive Regulation of Apoptotic Process (GO:0043065)	2/313	0.883704	0.891784	0.539278	0.0666729	CARM1;ZNF268	.
Extracellular Matrix Organization (GO:0030198)	1/182	0.88372	0.891784	0.464397	0.0574065	HMCN1	.
Positive Regulation of Gene Expression (GO:0010628)	3/436	0.887731	0.895151	0.579857	0.069053	IL4;RNF207;PIK3R3	.
Proteolysis (GO:0006508)	2/321	0.892145	0.898919	0.525538	0.0599779	NPEPPS;UBE3A	.
Regulation of Programmed Cell Death (GO:0043067)	1/195	0.900362	0.90651	0.43299	0.0454461	FBXO11	.
Endomembrane System Organization (GO:0010256)	1/196	0.901539	0.907007	0.430747	0.0446479	DYM	.
Protein Localization to Membrane (GO:0072657)	1/199	0.904988	0.909787	0.424156	0.042345	PACS2	.
Negative Regulation of Macromolecule Biosynthetic Process (GO:0010558)	1/202	0.908317	0.911752	0.417761	0.0401727	SMAD5	.
Adenylate Cyclase-Modulating G Protein-Coupled Receptor Signaling Pathway (GO:0007188)	1/202	0.908317	0.911752	0.417761	0.0401727	PRKCA	.
mRNA Processing (GO:0006397)	1/226	0.931088	0.933904	0.372742	0.0266142	PRKCA	.
Cellular Response to Lipid (GO:0071396)	1/234	0.937349	0.939473	0.359797	0.0232786	RORB	.
Positive Regulation of Programmed Cell Death (GO:0043068)	1/248	0.946973	0.948403	0.33916	0.018479	ZNF268	.
Regulation of MAPK Cascade (GO:0043408)	1/260	0.954041	0.95476	0.323247	0.0152084	CX3CL1	.
Positive Regulation of Cytokine Production (GO:0001819)	1/325	0.978855	0.978855	0.257537	0.00550414	IL4	.

## Sheet: Table S3
Supplementary File, Table S3. The complete list of the functional enrichment analysis results for yellow module.
Biological Process	Overlap	P.value	Adjusted.P.value	Odds.Ratio	Combined.Score	Genes			KEGG Pathway	Overlap	P.value	Adjusted.P.value	Odds.Ratio	Combined.Score	Genes
Intraciliary Anterograde Transport (GO:0035720)	3/17	0.000186685	0.062004	32.4733	278.819	IFT74;CLUAP1;IFT25	.		Terpenoid backbone biosynthesis	2/22	0.00942775	0.783959	15.0348	70.124	FNTB;PDSS2	.
Positive Regulation of Transcription Elongation by RNA Polymerase II (GO:0032968)	4/46	0.000252763	0.062004	14.5231	120.296	MED11;MED21;MED19;MED26	.		Spliceosome	4/150	0.0184241	0.783959	4.15595	16.5993	PRPF6;SNW1;HSPA1L;PRPF31	.
Positive Regulation of Transcription Initiation by RNA Polymerase II (GO:0060261)	4/54	0.000470002	0.062004	12.1945	93.4434	MED11;MED21;MED19;MED26	.		Rap1 signaling pathway	4/210	0.0529538	0.783959	2.93652	8.62848	CSF1R;EFNA2;EVL;FGF1	.
Positive Regulation of DNA-templated Transcription, Elongation (GO:0032786)	4/54	0.000470002	0.062004	12.1945	93.4434	MED11;MED21;MED19;MED26	.		Acute myeloid leukemia	2/67	0.0743215	0.783959	4.61562	11.9976	CSF1R;TCF7L1	.
Regulation of Transcription Initiation by RNA Polymerase II (GO:0060260)	4/59	0.000659152	0.062004	11.0831	81.1786	MED11;MED21;MED19;MED26	.		PI3K-Akt signaling pathway	5/354	0.0898933	0.783959	2.16754	5.2219	CSF1R;EFNA2;MLST8;PPP2R5D;FGF1	.
Positive Regulation of DNA-templated Transcription Initiation (GO:2000144)	4/59	0.000659152	0.062004	11.0831	81.1786	MED11;MED21;MED19;MED26	.		Arrhythmogenic right ventricular cardiomyopathy	2/77	0.0942671	0.783959	3.99818	9.4422	TCF7L1;SGCA	.
RNA Polymerase II Preinitiation Complex Assembly (GO:0051123)	4/60	0.000702599	0.062004	10.8846	79.0302	MED11;MED21;MED19;MED26	.		Selenocompound metabolism	1/17	0.108035	0.783959	9.32801	20.7576	TXNRD2	.
Transcription Preinitiation Complex Assembly (GO:0070897)	4/63	0.00084507	0.062004	10.3296	73.0932	MED11;MED21;MED19;MED26	.		Other glycan degradation	1/18	0.114017	0.783959	8.77886	19.0625	ENGASE	.
Cilium Organization (GO:0044782)	7/230	0.000926313	0.062004	4.85509	33.9094	IFT74;CEP131;DYNLT2B;CC2D2A;CLUAP1;CCDC28B;IFT25	.		MAPK signaling pathway	4/294	0.135479	0.783959	2.07703	4.15185	CSF1R;EFNA2;HSPA1L;FGF1	.
Protein Methylation (GO:0006479)	3/29	0.000945915	0.062004	17.475	121.685	METTL22;FAM98B;EEF1AKMT1	.		mRNA surveillance pathway	2/98	0.140177	0.783959	3.12027	6.13084	PPP2R5D;GSPT2	.
DNA Repair (GO:0006281)	8/302	0.000992786	0.062004	4.22676	29.228	NTHL1;MGMT;APLF;EXO5;ADPRS;ERCC5;COMMD1;MEN1	.		Folate biosynthesis	1/26	0.160455	0.783959	5.96722	10.9185	PCBD2	.
Cilium Assembly (GO:0060271)	7/247	0.00139868	0.0760477	4.50728	29.6229	IFT74;CEP131;DYNLT2B;CC2D2A;CLUAP1;CCDC28B;IFT25	.		Neurotrophin signaling pathway	2/119	0.189764	0.783959	2.5575	4.2505	ZNF274;PRDM4	.
Transcription Initiation at RNA Polymerase II Promoter (GO:0006367)	5/123	0.00143904	0.0760477	6.48666	42.4473	MED11;MED21;MED19;MED26;MEN1	.		Base excision repair	1/33	0.199102	0.783959	4.66024	7.52134	NTHL1	.
Smoothened Signaling Pathway (GO:0007224)	3/35	0.00164539	0.0807416	14.1942	90.9815	CC2D2A;DISP1;IFT25	.		Ras signaling pathway	3/232	0.203862	0.783959	1.96377	3.123	CSF1R;EFNA2;FGF1	.
Regulation of Transcription Elongation by RNA Polymerase II (GO:0034243)	4/79	0.00196301	0.0899057	8.11938	50.6104	MED11;MED21;MED19;MED26	.		Purine metabolism	2/129	0.214145	0.783959	2.35493	3.62918	GUCY1A2;NUDT5	.
Organelle Assembly (GO:0070925)	8/346	0.00233662	0.100329	3.66826	22.2262	IFT74;CEP131;DYNLT2B;CC2D2A;CHMP7;CLUAP1;CCDC28B;IFT25	.		Thyroid cancer	1/37	0.220388	0.783959	4.1416	6.26363	TCF7L1	.
Plasma Membrane Bounded Cell Projection Assembly (GO:0120031)	7/277	0.00267138	0.107955	4.00035	23.7027	IFT74;CEP131;DYNLT2B;CC2D2A;CLUAP1;CCDC28B;IFT25	.		Vascular smooth muscle contraction	2/133	0.223983	0.783959	2.28256	3.41513	GUCY1A2;PPP1R14A	.
Synaptic Vesicle Membrane Organization (GO:0048499)	2/13	0.00331125	0.126379	27.3485	156.172	SNAP47;SYP	.		Ferroptosis	1/41	0.241112	0.783959	3.72669	5.3012	SAT2	.
Spliceosomal tri-snRNP Complex Assembly (GO:0000244)	2/14	0.00384622	0.139071	25.0682	139.396	PRPF6;PRPF31	.		Breast cancer	2/147	0.258634	0.783959	2.06071	2.78678	TCF7L1;FGF1	.
Protein Alkylation (GO:0008213)	2/16	0.0050277	0.172701	21.4848	113.715	METTL22;FAM98B	.		Gastric cancer	2/149	0.263598	0.783959	2.03247	2.70995	TCF7L1;FGF1	.
Nucleotide-Excision Repair (GO:0006289)	3/53	0.00539538	0.176506	9.07603	47.397	NTHL1;ERCC5;COMMD1	.		Nucleotide excision repair	1/47	0.271177	0.783959	3.23962	4.22765	ERCC5	.
Positive Regulation of Transcription by RNA Polymerase II (GO:0045944)	14/983	0.00624705	0.195078	2.27518	11.548	TCF7L1;SPAG8;PRDM4;NCOA6;MED19;FGF1;MED26;PAGR1;MED11;TOX3;PRPF6;SNW1;MED21;MEN1	.		Cushing syndrome	2/155	0.278491	0.783959	1.95217	2.4956	TCF7L1;MEN1	.
DNA Damage Response (GO:0006974)	8/421	0.00752488	0.224765	2.99058	14.6226	NCOA6;MGMT;APLF;MLST8;ADPRS;NUPR2;ZNF385A;MEN1	.		Arginine and proline metabolism	1/50	0.285763	0.783959	3.04082	3.8089	SAT2	.
Positive Regulation of Transforming Growth Factor Beta Receptor Signaling Pathway (GO:0030511)	2/24	0.0111665	0.295053	13.6667	61.4295	SNW1;MEN1	.		Ribosome	2/158	0.285932	0.783959	1.91434	2.39675	MRPL30;MRPS17	.
Osteoclast Differentiation (GO:0030316)	2/24	0.0111665	0.295053	13.6667	61.4295	CSF1R;EFNA2	.		Hippo signaling pathway	2/163	0.298316	0.783959	1.85441	2.2431	TCF7L1;FGF1	.
Positive Regulation of Cellular Response to Transforming Growth Factor Beta Stimulus (GO:1903846)	2/24	0.0111665	0.295053	13.6667	61.4295	SNW1;MEN1	.		Glycosaminoglycan biosynthesis	1/53	0.300059	0.783959	2.86495	3.44876	EXTL1	.
Macromolecule Methylation (GO:0043414)	2/26	0.0130348	0.331664	12.5265	54.3667	METTL22;FAM98B	.		Hepatocellular carcinoma	2/168	0.310667	0.783959	1.7981	2.10204	TCF7L1;TXNRD2	.
Regulation of Transcription by RNA Polymerase II (GO:0006357)	24/2250	0.0142223	0.348953	1.72899	7.35329	ZNF274;TENM2;ZHX2;TCF7L1;ZNF174;ZNF394;SPAG8;PRDM4;NCOA6;MED19;FGF1;MED26;PAGR1;TOX3;PRPF6;SNW1;KAT6B;BCL7C;MED21;ZNF835;ZNF768;NUPR2;ZNF787;MEN1	.		Hedgehog signaling pathway	1/56	0.314072	0.783959	2.70827	3.13654	DISP1	.
Regulation of Cell Cycle G1/S Phase Transition (GO:1902806)	3/79	0.016063	0.359543	5.96324	24.6356	PAGR1;TCF7L1;BCL7C	.		Legionellosis	1/57	0.31868	0.783959	2.65977	3.04163	HSPA1L	.
Positive Regulation of Protein Targeting to Mitochondrion (GO:1903955)	2/29	0.0160723	0.359543	11.133	45.9866	HSPA1L;RHOU	.		Endometrial cancer	1/58	0.323258	0.783959	2.61298	2.95085	TCF7L1	.
DNA Metabolic Process (GO:0006259)	6/302	0.0162239	0.359543	3.09913	12.7724	NTHL1;MGMT;APLF;ADPRS;ERCC5;MEN1	.		Notch signaling pathway	1/59	0.327806	0.783959	2.5678	2.86396	SNW1	.
Regulation of Bone Resorption (GO:0045124)	2/30	0.0171456	0.368094	10.7348	43.6481	CSF1R;CXXC1	.		Long-term depression	1/60	0.332323	0.783959	2.52415	2.78073	GUCY1A2	.
Positive Regulation of Locomotion (GO:0040017)	2/32	0.0193808	0.378733	10.0182	39.5064	CSF1R;PHPT1	.		Mineral absorption	1/60	0.332323	0.783959	2.52415	2.78073	CLCN2	.
Positive Regulation of Establishment of Protein Localization to Mitochondrion (GO:1903749)	2/32	0.0193808	0.378733	10.0182	39.5064	HSPA1L;RHOU	.		Viral myocarditis	1/60	0.332323	0.783959	2.52415	2.78073	SGCA	.
Regulation of Cell Division (GO:0051302)	3/85	0.0194924	0.378733	5.52523	21.7569	KIF13A;ATXN10;FGF1	.		Axon guidance	2/182	0.344987	0.783959	1.65707	1.76353	EFNA2;TRPC4	.
Chromatin Organization (GO:0006325)	6/323	0.0217788	0.378733	2.89072	11.0623	ZNF274;TCF7L1;HIRIP3;KAT6B;BCL7C;NUDT5	.		Basal cell carcinoma	1/63	0.345694	0.783959	2.40165	2.55104	TCF7L1	.
Positive Regulation of DNA-templated Transcription (GO:0045893)	15/1274	0.0236286	0.378733	1.86292	6.9772	TCF7L1;SPAG8;PRDM4;NCOA6;CXXC1;MED19;FGF1;PAGR1;TOX3;PRPF6;SNW1;KAT6B;MED21;PCBD2;MEN1	.		GnRH secretion	1/64	0.350091	0.783959	2.36341	2.48054	TRPC4	.
Positive Regulation of RNA Splicing (GO:0033120)	2/36	0.0241934	0.378733	8.83779	32.8914	SNW1;HABP4	.		Retinol metabolism	1/68	0.367391	0.783959	2.22186	2.22481	ALDH1A2	.
Spliceosomal snRNP Assembly (GO:0000387)	2/37	0.0254653	0.378733	8.58485	31.5102	PRPF6;PRPF31	.		Transcriptional misregulation in cancer	2/192	0.369172	0.783959	1.56906	1.56356	CSF1R;MEN1	.
Base-Excision Repair (GO:0006284)	2/39	0.0280888	0.378733	8.11998	29.0077	NTHL1;ERCC5	.		Renin secretion	1/69	0.371644	0.783959	2.18908	2.16679	GUCY1A2	.
Regulation of Protein Targeting to Mitochondrion (GO:1903214)	2/40	0.0294396	0.378733	7.9059	27.8716	HSPA1L;RHOU	.		Adherens junction	1/71	0.380065	0.783959	2.12632	2.05703	TCF7L1	.
Regulation of Endothelial Cell Chemotaxis to Fibroblast Growth Factor (GO:2000544)	1/5	0.0330572	0.378733	37.3346	127.293	FGF1	.		Human papillomavirus infection	3/331	0.382692	0.783959	1.36413	1.31028	TCF7L1;PPP2R5D;TUBG2	.
Gap Junction Assembly (GO:0016264)	1/5	0.0330572	0.378733	37.3346	127.293	GJB1	.		Melanoma	1/72	0.384233	0.783959	2.09626	2.00509	FGF1	.
RNA Decapping (GO:0110154)	1/5	0.0330572	0.378733	37.3346	127.293	DCPS	.		Antigen processing and presentation	1/78	0.408665	0.783959	1.93233	1.72916	HSPA1L	.
Regulation of Mitochondrial Membrane Permeability Involved in Apoptotic Process (GO:1902108)	1/5	0.0330572	0.378733	37.3346	127.293	NAIF1	.		RNA degradation	1/79	0.412643	0.783959	1.90746	1.68843	DCPS	.
Immunoglobulin V(D)J Recombination (GO:0033152)	1/5	0.0330572	0.378733	37.3346	127.293	TCF7L1	.		Colorectal cancer	1/86	0.439751	0.783959	1.74976	1.43751	TCF7L1	.
Intracellular mRNA Localization (GO:0008298)	1/5	0.0330572	0.378733	37.3346	127.293	ZNF385A	.		Gap junction	1/88	0.447266	0.783959	1.70936	1.37536	GUCY1A2	.
Regulation of Pentose-Phosphate Shunt (GO:0043456)	1/5	0.0330572	0.378733	37.3346	127.293	MLST8	.		Hypertrophic cardiomyopathy	1/90	0.45468	0.783959	1.67078	1.31684	SGCA	.
Positive Regulation of Vitamin D Receptor Signaling Pathway (GO:0070564)	1/5	0.0330572	0.378733	37.3346	127.293	SNW1	.		Salivary secretion	1/93	0.465617	0.783959	1.61605	1.2353	GUCY1A2	.
Plus-End-Directed Organelle Transport Along Microtubule (GO:0072386)	1/5	0.0330572	0.378733	37.3346	127.293	KIF13A	.		Dilated cardiomyopathy	1/96	0.476336	0.783959	1.56478	1.16049	SGCA	.
Response to Testosterone (GO:0033574)	1/5	0.0330572	0.378733	37.3346	127.293	CXXC1	.		Pathways in cancer	4/531	0.477755	0.783959	1.12912	0.834032	CSF1R;TCF7L1;TXNRD2;FGF1	.
snoRNA Localization (GO:0048254)	1/5	0.0330572	0.378733	37.3346	127.293	PRPF31	.		Circadian entrainment	1/97	0.479862	0.783959	1.5484	1.13692	GUCY1A2	.
Actin Filament-Based Transport (GO:0099515)	1/6	0.0395373	0.378733	29.8662	96.483	SUN2	.		Prostate cancer	1/97	0.479862	0.783959	1.5484	1.13692	TCF7L1	.
Negative Regulation of Ruffle Assembly (GO:1900028)	1/6	0.0395373	0.378733	29.8662	96.483	EVL	.		Hematopoietic cell lineage	1/99	0.486842	0.783959	1.51665	1.09171	CSF1R	.
Intraciliary Transport Involved in Cilium Assembly (GO:0035735)	1/6	0.0395373	0.378733	29.8662	96.483	IFT74	.		Viral protein interaction with cytokine and cytokine receptor	1/100	0.490298	0.783959	1.50125	1.07001	CSF1R	.
Regulation of Response to Nutrient Levels (GO:0032107)	1/6	0.0395373	0.378733	29.8662	96.483	SNW1	.		Melanogenesis	1/101	0.49373	0.783959	1.48617	1.04889	TCF7L1	.
Osteoblast Development (GO:0002076)	1/6	0.0395373	0.378733	29.8662	96.483	MEN1	.		Longevity regulating pathway	1/102	0.497139	0.783959	1.47138	1.02832	HSPA1L	.
Polyamine Biosynthetic Process (GO:0006596)	1/6	0.0395373	0.378733	29.8662	96.483	SAT2	.		Endocytosis	2/252	0.505218	0.783959	1.18885	0.811704	HSPA1L;CHMP7	.
Response to UV-C (GO:0010225)	1/6	0.0395373	0.378733	29.8662	96.483	ERCC5	.		Toxoplasmosis	1/112	0.530002	0.784554	1.33814	0.849551	HSPA1L	.
Regulation of Aldosterone Biosynthetic Process (GO:0032347)	1/6	0.0395373	0.378733	29.8662	96.483	CLCN2	.		Sphingolipid signaling pathway	1/119	0.55173	0.784554	1.25832	0.748317	PPP2R5D	.
Mitotic Nuclear Division (GO:0140014)	2/47	0.0395865	0.378733	6.67374	21.5513	TUBG2;CHMP7	.		AMPK signaling pathway	1/120	0.554751	0.784554	1.24768	0.735177	PPP2R5D	.
Protein Localization to Chromosome (GO:0034502)	2/49	0.0426963	0.378733	6.3891	20.149	APLF;CHMP7	.		Platelet activation	1/124	0.566636	0.784554	1.20686	0.685542	GUCY1A2	.
Nervous System Development (GO:0007399)	7/480	0.0429579	0.378733	2.25984	7.11293	GJB1;GLRB;ALDH1A2;PPP2R5D;EVL;ATXN10;FGF1	.		Osteoclast differentiation	1/127	0.575342	0.784554	1.17794	0.651157	CSF1R	.
TORC2 Signaling (GO:0038203)	1/7	0.0459743	0.378733	24.8872	76.6445	MLST8	.		Oocyte meiosis	1/129	0.58105	0.784554	1.15942	0.629472	PPP2R5D	.
Negative Regulation of Sodium Ion Transport (GO:0010766)	1/7	0.0459743	0.378733	24.8872	76.6445	COMMD1	.		Dopaminergic synapse	1/132	0.589469	0.784554	1.1327	0.598669	PPP2R5D	.
Long-Chain Fatty Acid Catabolic Process (GO:0042758)	1/7	0.0459743	0.378733	24.8872	76.6445	ADTRP	.		Cytokine-cytokine receptor interaction	2/295	0.590474	0.784554	1.01215	0.533232	CSF1R;TNFSF12	.
Peptide Transport (GO:0015833)	1/7	0.0459743	0.378733	24.8872	76.6445	DISP1	.		Autophagy	1/137	0.603129	0.784554	1.09078	0.551525	MLST8	.
Regulation of Vitamin D Receptor Signaling Pathway (GO:0070562)	1/7	0.0459743	0.378733	24.8872	76.6445	SNW1	.		Estrogen signaling pathway	1/137	0.603129	0.784554	1.09078	0.551525	HSPA1L	.
Deadenylation-Dependent Decapping of Nuclear-Transcribed mRNA (GO:0000290)	1/7	0.0459743	0.378733	24.8872	76.6445	DCPS	.		Measles	1/139	0.608465	0.784554	1.07486	0.534007	HSPA1L	.
Depyrimidination (GO:0045008)	1/7	0.0459743	0.378733	24.8872	76.6445	NTHL1	.		Apoptosis	1/142	0.616337	0.784554	1.05183	0.509045	DIABLO	.
Cellular Response to Mechanical Stimulus (GO:0071260)	2/53	0.0491777	0.378733	5.88681	17.7329	HABP4;KCNK4	.		Spinocerebellar ataxia	1/143	0.618926	0.784554	1.04437	0.501057	ATXN10	.
Synaptic Vesicle Fusion to Presynaptic Active Zone Membrane (GO:0031629)	1/8	0.0523685	0.378733	21.3308	62.9142	SNAP47	.		Adrenergic signaling in cardiomyocytes	1/150	0.63657	0.786022	0.994954	0.449382	PPP2R5D	.
Positive Regulation of Intracellular Estrogen Receptor Signaling Pathway (GO:0033148)	1/8	0.0523685	0.378733	21.3308	62.9142	PAGR1	.		mTOR signaling pathway	1/154	0.646285	0.786022	0.968745	0.422872	MLST8	.
Transcription-Coupled Nucleotide-Excision Repair (GO:0006283)	1/8	0.0523685	0.378733	21.3308	62.9142	ERCC5	.		Oxytocin signaling pathway	1/154	0.646285	0.786022	0.968745	0.422872	GUCY1A2	.
Negative Regulation of Sodium Ion Transmembrane Transport (GO:1902306)	1/8	0.0523685	0.378733	21.3308	62.9142	COMMD1	.		Necroptosis	1/159	0.658067	0.789681	0.937851	0.392442	CHMP7	.
Regulation of Morphogenesis of an Epithelium (GO:1905330)	1/8	0.0523685	0.378733	21.3308	62.9142	FGF1	.		Wnt signaling pathway	1/166	0.673911	0.79013	0.897744	0.354302	TCF7L1	.
Isoprenoid Biosynthetic Process (GO:0008299)	1/8	0.0523685	0.378733	21.3308	62.9142	PDSS2	.		cGMP-PKG signaling pathway	1/167	0.676114	0.79013	0.892291	0.349237	GUCY1A2	.
Response to Vitamin (GO:0033273)	1/8	0.0523685	0.378733	21.3308	62.9142	CXXC1	.		Protein processing in endoplasmic reticulum	1/171	0.684779	0.79013	0.871119	0.329857	HSPA1L	.
Response to Vitamin D (GO:0033280)	1/8	0.0523685	0.378733	21.3308	62.9142	CXXC1	.		Kaposi sarcoma-associated herpesvirus infection	1/193	0.728485	0.829231	0.770442	0.244067	TCF7L1	.
Somatic Recombination of Immunoglobulin Gene Segments (GO:0016447)	1/8	0.0523685	0.378733	21.3308	62.9142	TCF7L1	.		Epstein-Barr virus infection	1/202	0.744579	0.829231	0.735608	0.216957	SNW1	.
Spermidine Metabolic Process (GO:0008216)	1/8	0.0523685	0.378733	21.3308	62.9142	SAT2	.		Viral carcinogenesis	1/203	0.746308	0.829231	0.731929	0.214175	SNW1	.
Golgi to Plasma Membrane Transport (GO:0006893)	2/55	0.0525435	0.378733	5.66409	16.6871	KIF13A;COMMD1	.		Lipid and atherosclerosis	1/215	0.766169	0.835903	0.690464	0.183907	HSPA1L	.
Regulation of Cell Motility (GO:2000145)	3/126	0.05283	0.378733	3.67585	10.8095	CSF1R;FGF1;PHPT1	.		Regulation of actin cytoskeleton	1/218	0.770888	0.835903	0.680815	0.177156	FGF1	.
mRNA Splicing, via Spliceosome (GO:0000398)	4/211	0.0537083	0.378733	2.92219	8.54502	PRPF6;SNW1;PRPF31;DCPS	.		Thermogenesis	1/232	0.791691	0.84824	0.639098	0.149283	MLST8	.
Mitotic Metaphase Chromosome Alignment (GO:0007080)	2/56	0.0542565	0.378733	5.55892	16.1989	CHMP7;CENPC	.		Calcium signaling pathway	1/240	0.802725	0.849944	0.617454	0.135681	FGF1	.
Positive Regulation of Cellular Process (GO:0048522)	8/622	0.0581076	0.378733	1.9908	5.66473	CSF1R;TCF7L1;BCL7C;CEP131;MLST8;FAM98B;FGF1;PHPT1	.		Salmonella infection	1/249	0.814446	0.852327	0.594773	0.122076	TCF7L1	.
Positive Regulation of Intracellular Steroid Hormone Receptor Signaling Pathway (GO:0033145)	1/9	0.0587201	0.378733	18.6635	52.9106	PAGR1	.		Prion disease	1/273	0.84243	0.871479	0.54163	0.0928705	HSPA1L	.
ESCRT III Complex Disassembly (GO:1904903)	1/9	0.0587201	0.378733	18.6635	52.9106	CHMP7	.		MicroRNAs in cancer	1/310	0.87758	0.897525	0.475874	0.0621429	EFNA2	.
ESCRT Complex Disassembly (GO:1904896)	1/9	0.0587201	0.378733	18.6635	52.9106	CHMP7	.		Neuroactive ligand-receptor interaction	1/341	0.900952	0.911075	0.4318	0.0450382	GLRB	.
Translational Termination (GO:0006415)	1/9	0.0587201	0.378733	18.6635	52.9106	GSPT2	.		Herpes simplex virus 1 infection	1/498	0.966299	0.966299	0.293021	0.0100455	ZNF768	.
Vesicle Fusion With Vacuole (GO:0051469)	1/9	0.0587201	0.378733	18.6635	52.9106	CHMP7	.
Regulation of Ketone Biosynthetic Process (GO:0010566)	1/9	0.0587201	0.378733	18.6635	52.9106	CLCN2	.
Negative Regulation of Protein Localization to Cell Surface (GO:2000009)	1/9	0.0587201	0.378733	18.6635	52.9106	COMMD1	.
Hormone Catabolic Process (GO:0042447)	1/9	0.0587201	0.378733	18.6635	52.9106	CXXC1	.
Isoprenoid Metabolic Process (GO:0006720)	1/9	0.0587201	0.378733	18.6635	52.9106	PDSS2	.
Brain Morphogenesis (GO:0048854)	1/9	0.0587201	0.378733	18.6635	52.9106	VPS51	.
Microtubule Cytoskeleton Organization Involved in Mitosis (GO:1902850)	2/59	0.0595119	0.378733	5.26555	14.8572	SUN2;TUBG2	.
Response to Light Stimulus (GO:0009416)	2/59	0.0595119	0.378733	5.26555	14.8572	ERCC5;MEN1	.
Post-Transcriptional Regulation of Gene Expression (GO:0010608)	2/60	0.0613013	0.378733	5.1745	14.447	PCIF1;ZNF385A	.
Protein Secretion (GO:0009306)	2/60	0.0613013	0.378733	5.1745	14.447	TANGO6;SNX19	.
Response to Retinoic Acid (GO:0032526)	2/60	0.0613013	0.378733	5.1745	14.447	SNW1;ALDH1A2	.
DNA-templated Transcription Initiation (GO:0006352)	2/62	0.0649347	0.378733	5.00152	13.676	NCOA6;MED26	.
Exit From Mitosis (GO:0010458)	1/10	0.0650295	0.378733	16.589	45.3362	CHMP7	.
Vacuole Fusion (GO:0097576)	1/10	0.0650295	0.378733	16.589	45.3362	CHMP7	.
Regulation of Macrophage Migration (GO:1905521)	1/10	0.0650295	0.378733	16.589	45.3362	CSF1R	.
Regulation of Mononuclear Cell Migration (GO:0071675)	1/10	0.0650295	0.378733	16.589	45.3362	CSF1R	.
Kinetochore Assembly (GO:0051382)	1/10	0.0650295	0.378733	16.589	45.3362	CENPC	.
Biogenic Amine Biosynthetic Process (GO:0042401)	1/10	0.0650295	0.378733	16.589	45.3362	SAT2	.
Megakaryocyte Development (GO:0035855)	1/10	0.0650295	0.378733	16.589	45.3362	ZNF385A	.
Mesonephros Development (GO:0001823)	1/10	0.0650295	0.378733	16.589	45.3362	FGF1	.
Multivesicular Body-Lysosome Fusion (GO:0061763)	1/10	0.0650295	0.378733	16.589	45.3362	CHMP7	.
mRNA Processing (GO:0006397)	4/226	0.0657241	0.378733	2.72266	7.41187	PRPF6;SNW1;PCIF1;PRPF31	.
Plasma Membrane Bounded Cell Projection Organization (GO:0120036)	3/141	0.0691479	0.378733	3.27381	8.74602	CSF1R;ATXN10;PHPT1	.
tRNA Splicing, via Endonucleolytic Cleavage and Ligation (GO:0006388)	1/11	0.071297	0.378733	14.9293	39.4269	FAM98B	.
RNA Splicing, via Endonucleolytic Cleavage and Ligation (GO:0000394)	1/11	0.071297	0.378733	14.9293	39.4269	FAM98B	.
Kinetochore Organization (GO:0051383)	1/11	0.071297	0.378733	14.9293	39.4269	CENPC	.
Base-Excision Repair, AP Site Formation (GO:0006285)	1/11	0.071297	0.378733	14.9293	39.4269	NTHL1	.
mRNA Methylguanosine-Cap Decapping (GO:0110156)	1/11	0.071297	0.378733	14.9293	39.4269	DCPS	.
Monocyte Differentiation (GO:0030224)	1/11	0.071297	0.378733	14.9293	39.4269	CSF1R	.
Positive Regulation of Bone Resorption (GO:0045780)	1/11	0.071297	0.378733	14.9293	39.4269	CXXC1	.
Protein-Containing Complex Disassembly (GO:0032984)	2/66	0.0724107	0.378733	4.68797	12.3078	CHMP7;GSPT2	.
Cellular Response to Lipid (GO:0071396)	4/234	0.0726602	0.378733	2.62689	6.8876	SNW1;CXXC1;ADTRP;KCNK4	.
Positive Regulation of Gene Expression (GO:0010628)	6/436	0.0733259	0.378733	2.11875	5.53596	PCIF1;HABP4;LRP3;FAM98B;ADTRP;MED26	.
Regulation of Cell Cycle Process (GO:0010564)	3/146	0.0750385	0.378733	3.15854	8.17985	BCL7C;KIF13A;ATXN10	.
Extrinsic Apoptotic Signaling Pathway (GO:0097191)	2/68	0.0762484	0.378733	4.54545	11.6989	DIABLO;TNFSF12	.
- Reg of Intrinsic Apoptotic Sgnlng Pway in Resp to DNA Damage by P53 Cls Mediator (GO:1902166)	1/12	0.0775227	0.378733	13.5714	34.7046	ZNF385A	.
V(D)J Recombination (GO:0033151)	1/12	0.0775227	0.378733	13.5714	34.7046	TCF7L1	.
Positive Regulation of Sterol Biosynthetic Process (GO:0106120)	1/12	0.0775227	0.378733	13.5714	34.7046	FGF1	.
Lysosomal Membrane Organization (GO:0097212)	1/12	0.0775227	0.378733	13.5714	34.7046	CHMP7	.
Regulation of Short-Term Neuronal Synaptic Plasticity (GO:0048172)	1/12	0.0775227	0.378733	13.5714	34.7046	SYP	.
Pyrimidine Deoxyribonucleotide Catabolic Process (GO:0009223)	1/12	0.0775227	0.378733	13.5714	34.7046	NTHL1	.
Polyamine Metabolic Process (GO:0006595)	1/12	0.0775227	0.378733	13.5714	34.7046	SAT2	.
Regulation of Alcohol Biosynthetic Process (GO:1902930)	1/12	0.0775227	0.378733	13.5714	34.7046	CLCN2	.
Positive Regulation of Cholesterol Biosynthetic Process (GO:0045542)	1/12	0.0775227	0.378733	13.5714	34.7046	FGF1	.
Negative Regulation of Amyloid Fibril Formation (GO:1905907)	1/12	0.0775227	0.378733	13.5714	34.7046	PFDN5	.
Regulation of DNA-templated Transcription (GO:0006355)	20/2139	0.0781743	0.378733	1.46933	3.74505	ZNF274;ZHX2;TCF7L1;ZNF174;ZNF394;NCOA6;CXXC1;MED26;TOX3;SNW1;KAT6B;BCL7C;MED21;ZNF835;ZNF768;NUPR2;ZNF787;PCBD2;PFDN5;MEN1	.
Lysosomal Transport (GO:0007041)	2/70	0.0801493	0.378733	4.41132	11.1336	VPS51;CHMP7	.
Negative Regulation of Cyclin-Dependent Protein Serine/Threonine Kinase Activity (GO:0045736)	1/13	0.083707	0.378733	12.4398	30.8562	MEN1	.
Regulation of Hemopoiesis (GO:1903706)	1/13	0.083707	0.378733	12.4398	30.8562	KAT6B	.
Reg of Intrinsic Apoptotic Sgnlng Pway in Resp to DNA Damage by P53 Cls Mediator (GO:1902165)	1/13	0.083707	0.378733	12.4398	30.8562	ZNF385A	.
Regulation of Long-Term Neuronal Synaptic Plasticity (GO:0048169)	1/13	0.083707	0.378733	12.4398	30.8562	SYP	.
Activation of Protein Kinase B Activity (GO:0032148)	1/13	0.083707	0.378733	12.4398	30.8562	FGF1	.
Positive Regulation of Protein Tyrosine Kinase Activity (GO:0061098)	1/13	0.083707	0.378733	12.4398	30.8562	CSF1R	.
Intraciliary Retrograde Transport (GO:0035721)	1/13	0.083707	0.378733	12.4398	30.8562	DYNLT2B	.
Neuronal Action Potential (GO:0019228)	1/13	0.083707	0.378733	12.4398	30.8562	KCNK4	.
Intrinsic Apoptotic Signaling Pathway in Response to Oxidative Stress (GO:0008631)	1/13	0.083707	0.378733	12.4398	30.8562	DIABLO	.
Nuclear Body Organization (GO:0030575)	1/13	0.083707	0.378733	12.4398	30.8562	HABP4	.
Nucleotide Metabolic Process (GO:0009117)	1/13	0.083707	0.378733	12.4398	30.8562	NUDT5	.
Regulation of Retinoic Acid Receptor Signaling Pathway (GO:0048385)	1/13	0.083707	0.378733	12.4398	30.8562	SNW1	.
Cellular Response to Acidic pH (GO:0071468)	1/13	0.083707	0.378733	12.4398	30.8562	KCNK4	.
Positive Regulation of Cell Motility (GO:2000147)	4/249	0.0866266	0.378733	2.46418	6.02774	CSF1R;SUN2;FGF1;PHPT1	.
Myeloid Leukocyte Differentiation (GO:0002573)	2/74	0.0881315	0.378733	4.1654	10.1175	CSF1R;EFNA2	.
Negative Regulation of Epithelial Cell Migration (GO:0010633)	1/14	0.0898501	0.378733	11.4824	27.668	EVL	.
Positive Regulation of Macrophage Chemotaxis (GO:0010759)	1/14	0.0898501	0.378733	11.4824	27.668	CSF1R	.
Ubiquinone Biosynthetic Process (GO:0006744)	1/14	0.0898501	0.378733	11.4824	27.668	PDSS2	.
Negative Regulation of Lyase Activity (GO:0051350)	1/14	0.0898501	0.378733	11.4824	27.668	PHPT1	.
Regulation of Microtubule-Based Movement (GO:0060632)	1/14	0.0898501	0.378733	11.4824	27.668	DYNLT2B	.
Cell-Cell Junction Maintenance (GO:0045217)	1/14	0.0898501	0.378733	11.4824	27.668	CSF1R	.
Meiotic Sister Chromatid Cohesion (GO:0051177)	1/14	0.0898501	0.378733	11.4824	27.668	PPP2R5D	.
Quinone Biosynthetic Process (GO:1901663)	1/14	0.0898501	0.378733	11.4824	27.668	PDSS2	.
Retinoic Acid Receptor Signaling Pathway (GO:0048384)	1/14	0.0898501	0.378733	11.4824	27.668	SNW1	.
Regulation of Fat Cell Differentiation (GO:0045598)	2/75	0.0901629	0.378733	4.10814	9.88474	LRP3;ZNF385A	.
Negative Regulation of Cyclin-Dependent Protein Kinase Activity (GO:1904030)	1/15	0.0959524	0.378733	10.6617	24.9899	MEN1	.
Protein K6-linked Ubiquitination (GO:0085020)	1/15	0.0959524	0.378733	10.6617	24.9899	RNF25	.
Mammary Gland Epithelium Development (GO:0061180)	1/15	0.0959524	0.378733	10.6617	24.9899	CSF1R	.
Centromere Complex Assembly (GO:0034508)	1/15	0.0959524	0.378733	10.6617	24.9899	CENPC	.
Copper Ion Homeostasis (GO:0055070)	1/15	0.0959524	0.378733	10.6617	24.9899	COMMD1	.
Regulation of Bone Remodeling (GO:0046850)	1/15	0.0959524	0.378733	10.6617	24.9899	CSF1R	.
Negative Regulation of RNA Biosynthetic Process (GO:1902679)	6/470	0.0965404	0.378733	1.96006	4.58222	ZHX2;ZNF174;SNW1;KAT6B;PFDN5;MEN1	.
Chromatin Remodeling (GO:0006338)	4/262	0.0997083	0.378733	2.33846	5.39134	ZNF274;BCL7C;APLF;NUDT5	.
Negative Regulation of Intrinsic Apoptotic Signaling Pathway by P53 Class Mediator (GO:1902254)	1/16	0.102014	0.378733	9.95038	22.7132	ZNF385A	.
Ubiquinone Metabolic Process (GO:0006743)	1/16	0.102014	0.378733	9.95038	22.7132	PDSS2	.
Attachment of Mitotic Spindle Microtubules to Kinetochore (GO:0051315)	1/16	0.102014	0.378733	9.95038	22.7132	CENPC	.
Late Endosome to Lysosome Transport (GO:1902774)	1/16	0.102014	0.378733	9.95038	22.7132	CHMP7	.
Positive Regulation of DNA Damage Response, Signal Transduction by P53 Class Mediator (GO:0043517)	1/16	0.102014	0.378733	9.95038	22.7132	ZNF385A	.
Ruffle Organization (GO:0031529)	1/16	0.102014	0.378733	9.95038	22.7132	CSF1R	.
Regulation of Amyloid Fibril Formation (GO:1905906)	1/16	0.102014	0.378733	9.95038	22.7132	PFDN5	.
Endosome to Lysosome Transport via Multivesicular Body Sorting Pathway (GO:0032510)	1/16	0.102014	0.378733	9.95038	22.7132	CHMP7	.
Regulation of Cytokinesis (GO:0032465)	2/81	0.102632	0.378733	3.79498	8.63965	KIF13A;ATXN10	.
Negative Regulation of Neuron Apoptotic Process (GO:0043524)	2/81	0.102632	0.378733	3.79498	8.63965	TOX3;VSTM2L	.
Wound Healing (GO:0042060)	2/81	0.102632	0.378733	3.79498	8.63965	FGF1;CHMP7	.
Negative Regulation of Cell Cycle (GO:0045786)	2/81	0.102632	0.378733	3.79498	8.63965	NUPR2;MEN1	.
RNA Splicing, via Transesterification Reactions With Bulged Adenosine as Nucleophile (GO:0000377)	3/171	0.107581	0.378733	2.68511	5.9865	PRPF6;SNW1;PRPF31	.
DNA Modification (GO:0006304)	1/17	0.108035	0.378733	9.32801	20.7576	NTHL1	.
Positive Regulation of Leukocyte Proliferation (GO:0070665)	1/17	0.108035	0.378733	9.32801	20.7576	CSF1R	.
TORC1 Signaling (GO:0038202)	1/17	0.108035	0.378733	9.32801	20.7576	MLST8	.
Heparan Sulfate Proteoglycan Biosynthetic Process (GO:0015012)	1/17	0.108035	0.378733	9.32801	20.7576	EXTL1	.
Regulation of Mitochondrial Membrane Permeability (GO:0046902)	1/17	0.108035	0.378733	9.32801	20.7576	NAIF1	.
Regulation of Protein Tyrosine Kinase Activity (GO:0061097)	1/17	0.108035	0.378733	9.32801	20.7576	CSF1R	.
Cell Junction Maintenance (GO:0034331)	1/17	0.108035	0.378733	9.32801	20.7576	CSF1R	.
Positive Regulation by Host of Viral Transcription (GO:0043923)	1/17	0.108035	0.378733	9.32801	20.7576	SNW1	.
Positive Regulation of Cholesterol Metabolic Process (GO:0090205)	1/17	0.108035	0.378733	9.32801	20.7576	FGF1	.
Negative Regulation of Cation Transmembrane Transport (GO:1904063)	1/17	0.108035	0.378733	9.32801	20.7576	COMMD1	.
+ Reg of Transmembrane Receptor Prot Serine/Threonine Kinase Sgnlng Pway (GO:0090100)	2/84	0.109036	0.378733	3.65558	8.10106	SNW1;MEN1	.
Positive Regulation of Sprouting Angiogenesis (GO:1903672)	1/18	0.114017	0.378733	8.77886	19.0625	FGF1	.
Branching Involved in Ureteric Bud Morphogenesis (GO:0001658)	1/18	0.114017	0.378733	8.77886	19.0625	FGF1	.
Nucleobase-Containing Small Molecule Metabolic Process (GO:0055086)	1/18	0.114017	0.378733	8.77886	19.0625	NUDT5	.
Protein Import Into Mitochondrial Matrix (GO:0030150)	1/18	0.114017	0.378733	8.77886	19.0625	DNLZ	.
Peptidyl-Lysine Methylation (GO:0018022)	1/18	0.114017	0.378733	8.77886	19.0625	EEF1AKMT1	.
Megakaryocyte Differentiation (GO:0030219)	1/18	0.114017	0.378733	8.77886	19.0625	ZNF385A	.
Detection of Mechanical Stimulus Involved in Sensory Perception (GO:0050974)	1/18	0.114017	0.378733	8.77886	19.0625	KCNK4	.
Double-Strand Break Repair (GO:0006302)	3/176	0.114657	0.378733	2.60685	5.64594	SWSAP1;APLF;ERCC5	.
Regulation of Mitotic Cell Cycle Phase Transition (GO:1901990)	2/88	0.117733	0.378733	3.48485	7.45527	TCF7L1;BCL7C	.
Negative Regulation of Transcription by RNA Polymerase II (GO:0000122)	8/732	0.118916	0.378733	1.67868	3.57448	ZNF274;TENM2;ZHX2;TCF7L1;ZNF174;SNW1;NUPR2;MEN1	.
Positive Regulation of Glycolytic Process (GO:0045821)	1/19	0.119958	0.378733	8.29073	17.5814	MLST8	.
Positive Regulation of Purine Nucleotide Catabolic Process (GO:0033123)	1/19	0.119958	0.378733	8.29073	17.5814	MLST8	.
Negative Regulation of Transferase Activity (GO:0051348)	1/19	0.119958	0.378733	8.29073	17.5814	PHPT1	.
Insulin Secretion (GO:0030073)	1/19	0.119958	0.378733	8.29073	17.5814	SNX19	.
Nuclear Migration (GO:0007097)	1/19	0.119958	0.378733	8.29073	17.5814	SUN2	.
cGMP-mediated Signaling (GO:0019934)	1/19	0.119958	0.378733	8.29073	17.5814	GUCY1A2	.
mRNA Cis Splicing, via Spliceosome (GO:0045292)	1/19	0.119958	0.378733	8.29073	17.5814	DCPS	.
Protein Localization to Microtubule Organizing Center (GO:1905508)	1/19	0.119958	0.378733	8.29073	17.5814	CEP131	.
Response to Acidic pH (GO:0010447)	1/19	0.119958	0.378733	8.29073	17.5814	KCNK4	.
Positive Regulation of Alcohol Biosynthetic Process (GO:1902932)	1/19	0.119958	0.378733	8.29073	17.5814	FGF1	.
Positive Regulation of Cell Cycle Phase Transition (GO:1901989)	1/19	0.119958	0.378733	8.29073	17.5814	PAGR1	.
Mitotic Spindle Organization (GO:0007052)	2/90	0.122145	0.378733	3.4053	7.15981	SUN2;TUBG2	.
Chloride Transport (GO:0006821)	2/90	0.122145	0.378733	3.4053	7.15981	GLRB;CLCN2	.
Regulation of Double-Strand Break Repair (GO:2000779)	2/91	0.124366	0.378733	3.36687	7.01832	MGMT;BCL7C	.
Positive Regulation of Macrophage Migration (GO:1905523)	1/20	0.12586	0.378733	7.85398	16.278	CSF1R	.
Regulation of Granulocyte Chemotaxis (GO:0071622)	1/20	0.12586	0.378733	7.85398	16.278	CSF1R	.
Positive Regulation of Translational Initiation (GO:0045948)	1/20	0.12586	0.378733	7.85398	16.278	HABP4	.
Regulation of Sodium Ion Transmembrane Transport (GO:1902305)	1/20	0.12586	0.378733	7.85398	16.278	COMMD1	.
Maintenance of Protein Location in Nucleus (GO:0051457)	1/20	0.12586	0.378733	7.85398	16.278	SUN2	.
Cellular Response to Fatty Acid (GO:0071398)	1/20	0.12586	0.378733	7.85398	16.278	KCNK4	.
Response to Fatty Acid (GO:0070542)	1/20	0.12586	0.378733	7.85398	16.278	KCNK4	.
Regulation of Osteoblast Differentiation (GO:0045667)	2/92	0.126598	0.378733	3.32929	6.88079	LRP3;MEN1	.
Positive Regulation of DNA Repair (GO:0045739)	2/93	0.128838	0.378733	3.29254	6.74707	MGMT;BCL7C	.
Mitochondrial Translation (GO:0032543)	2/94	0.131088	0.378733	3.25659	6.61701	MRPS17;MRPL30	.
Positive Regulation of Double-Strand Break Repair (GO:2000781)	2/94	0.131088	0.378733	3.25659	6.61701	MGMT;BCL7C	.
Regulation of Macrophage Chemotaxis (GO:0010758)	1/21	0.131723	0.378733	7.4609	15.1237	CSF1R	.
Intrinsic Apoptotic Signaling Pathway in Response to DNA Damage by P53 Class Mediator (GO:0042771)	1/21	0.131723	0.378733	7.4609	15.1237	SNW1	.
Protein Localization to Centrosome (GO:0071539)	1/21	0.131723	0.378733	7.4609	15.1237	CEP131	.
Plasma Membrane Repair (GO:0001778)	1/21	0.131723	0.378733	7.4609	15.1237	CHMP7	.
Midbody Abscission (GO:0061952)	1/21	0.131723	0.378733	7.4609	15.1237	CHMP7	.
Cellular Response to pH (GO:0071467)	1/21	0.131723	0.378733	7.4609	15.1237	KCNK4	.
Response to Gamma Radiation (GO:0010332)	1/21	0.131723	0.378733	7.4609	15.1237	MEN1	.
Sensory Perception of Pain (GO:0019233)	1/21	0.131723	0.378733	7.4609	15.1237	KCNK4	.
Macromolecule Biosynthetic Process (GO:0009059)	3/189	0.13384	0.378733	2.42305	4.87302	MRPL30;MRPS17;GSPT2	.
Regulation of Gene Expression (GO:0010468)	11/1127	0.135177	0.378733	1.50254	3.00683	ZNF274;TCF7L1;PRDM4;KAT6B;CAVIN4;CXXC1;LRP3;FAM98B;ADTRP;MED26;PFDN5	.
Regulation of Actin Filament-Based Process (GO:0032970)	2/96	0.135615	0.378733	3.18698	6.36736	CSF1R;MLST8	.
Heparan Sulfate Proteoglycan Metabolic Process (GO:0030201)	1/22	0.137546	0.378733	7.10526	14.0954	EXTL1	.
Regulation of Mitotic Spindle Assembly (GO:1901673)	1/22	0.137546	0.378733	7.10526	14.0954	CHMP7	.
Androgen Metabolic Process (GO:0008209)	1/22	0.137546	0.378733	7.10526	14.0954	CXXC1	.
Neuron Apoptotic Process (GO:0051402)	1/22	0.137546	0.378733	7.10526	14.0954	DIABLO	.
Chaperone-Mediated Protein Complex Assembly (GO:0051131)	1/22	0.137546	0.378733	7.10526	14.0954	DNLZ	.
Negative Regulation of T Cell Receptor Signaling Pathway (GO:0050860)	1/22	0.137546	0.378733	7.10526	14.0954	PHPT1	.
Negative Regulation of DNA-templated Transcription (GO:0045892)	10/1006	0.137933	0.378733	1.52789	3.02672	ZNF274;TENM2;ZHX2;TCF7L1;ZNF174;SNW1;KAT6B;NUPR2;PFDN5;MEN1	.
Regulation of Protein Secretion (GO:0050708)	2/99	0.142471	0.378733	3.08794	6.01722	ENSA;ADTRP	.
Endosome Transport via Multivesicular Body Sorting Pathway (GO:0032509)	1/23	0.143331	0.378733	6.78195	13.1746	CHMP7	.
Positive Regulation of mRNA Splicing, via Spliceosome (GO:0048026)	1/23	0.143331	0.378733	6.78195	13.1746	SNW1	.
Zinc Ion Transmembrane Transport (GO:0071577)	1/23	0.143331	0.378733	6.78195	13.1746	TMEM163	.
T-helper Cell Differentiation (GO:0042093)	1/23	0.143331	0.378733	6.78195	13.1746	MEN1	.
Positive Regulation of Tyrosine Phosphorylation of STAT Protein (GO:0042531)	1/23	0.143331	0.378733	6.78195	13.1746	CSF1R	.
Nuclear Membrane Reassembly (GO:0031468)	1/23	0.143331	0.378733	6.78195	13.1746	CHMP7	.
Regulation of Cholesterol Biosynthetic Process (GO:0045540)	1/23	0.143331	0.378733	6.78195	13.1746	FGF1	.
Mitochondrial Gene Expression (GO:0140053)	2/100	0.144772	0.378733	3.05628	5.90654	MRPL30;MRPS17	.
Response to UV (GO:0009411)	2/100	0.144772	0.378733	3.05628	5.90654	ERCC5;MEN1	.
Monoatomic Ion Transport (GO:0006811)	2/100	0.144772	0.378733	3.05628	5.90654	SLC25A1;GLRB	.
Regulation of Cell Population Proliferation (GO:0042127)	8/769	0.145008	0.378733	1.59398	3.07792	CSF1R;BCL7C;ALDH1A2;CEP131;NUPR2;FAM98B;FGF1;MEN1	.
Regulation of Intracellular Signal Transduction (GO:1902531)	4/302	0.145148	0.378733	2.02044	3.89946	CSF1R;SNW1;RHOU;FGF1	.
Hemopoiesis (GO:0030097)	2/101	0.147082	0.378733	3.02525	5.79871	CSF1R;NCOA6	.
mRNA Metabolic Process (GO:0016071)	2/101	0.147082	0.378733	3.02525	5.79871	PCIF1;DCPS	.
Recombinational Repair (GO:0000725)	2/101	0.147082	0.378733	3.02525	5.79871	SWSAP1;ERCC5	.
Vesicle Transport Along Microtubule (GO:0047496)	1/24	0.149077	0.378733	6.48676	12.3462	KIF13A	.
RNA Splicing, via Transesterification Reactions (GO:0000375)	1/24	0.149077	0.378733	6.48676	12.3462	PRPF6	.
Regulation of Ruffle Assembly (GO:1900027)	1/24	0.149077	0.378733	6.48676	12.3462	EVL	.
Macrophage Differentiation (GO:0030225)	1/24	0.149077	0.378733	6.48676	12.3462	CSF1R	.
Cellular Response to Steroid Hormone Stimulus (GO:0071383)	1/24	0.149077	0.378733	6.48676	12.3462	ADTRP	.
Mitotic Cytokinetic Process (GO:1902410)	1/24	0.149077	0.378733	6.48676	12.3462	CHMP7	.
Negative Regulation of DNA Binding (GO:0043392)	1/24	0.149077	0.378733	6.48676	12.3462	HABP4	.
Negative Regulation of Translation (GO:0017148)	2/102	0.149398	0.378733	2.99485	5.69362	PCIF1;HABP4	.
Regulation of Actin Cytoskeleton Organization (GO:0032956)	2/104	0.154054	0.381138	2.93583	5.49132	CSF1R;MLST8	.
Negative Regulation of Intrinsic Apoptotic Signaling Pathway in Response to DNA Damage (GO:1902230)	1/25	0.154785	0.381138	6.21617	11.5976	ZNF385A	.
Late Endosome to Vacuole Transport via Multivesicular Body Sorting Pathway (GO:0032511)	1/25	0.154785	0.381138	6.21617	11.5976	CHMP7	.
Cellular Response to Low-Density Lipoprotein Particle Stimulus (GO:0071404)	1/25	0.154785	0.381138	6.21617	11.5976	ADTRP	.
Chaperone Cofactor-Dependent Protein Refolding (GO:0051085)	1/25	0.154785	0.381138	6.21617	11.5976	HSPA1L	.
Retinoic Acid Metabolic Process (GO:0042573)	1/25	0.154785	0.381138	6.21617	11.5976	ALDH1A2	.
Negative Regulation of Catalytic Activity (GO:0043086)	1/25	0.154785	0.381138	6.21617	11.5976	PHPT1	.
Regulation of Centrosome Cycle (GO:0046605)	1/25	0.154785	0.381138	6.21617	11.5976	CEP131	.
Regulation of Cytoplasmic Translation (GO:2000765)	1/26	0.160455	0.385429	5.96722	10.9185	ZNF385A	.
Positive Regulation of mRNA Processing (GO:0050685)	1/26	0.160455	0.385429	5.96722	10.9185	SNW1	.
Fat-Soluble Vitamin Metabolic Process (GO:0006775)	1/26	0.160455	0.385429	5.96722	10.9185	ALDH1A2	.
Regulation of Nucleotide-Excision Repair (GO:2000819)	1/26	0.160455	0.385429	5.96722	10.9185	BCL7C	.
Microtubule Nucleation (GO:0007020)	1/26	0.160455	0.385429	5.96722	10.9185	TUBG2	.
Myeloid Cell Development (GO:0061515)	1/26	0.160455	0.385429	5.96722	10.9185	ZNF385A	.
Positive Regulation of Filopodium Assembly (GO:0051491)	1/26	0.160455	0.385429	5.96722	10.9185	TENM2	.
Positive Regulation of Translation (GO:0045727)	2/108	0.163449	0.386787	2.82447	5.11584	PCIF1;HABP4	.
Modification-Dependent Protein Catabolic Process (GO:0019941)	3/208	0.163686	0.386787	2.19635	3.97497	RNF25;HECW1;FBXO10	.
Positive Regulation of Vasculature Development (GO:1904018)	2/109	0.165813	0.386787	2.79793	5.02758	TNFSF12;FGF1	.
Positive Regulation of Lipid Metabolic Process (GO:0045834)	1/27	0.166087	0.386787	5.73742	10.3001	MLST8	.
Regulation of Intracellular Estrogen Receptor Signaling Pathway (GO:0033146)	1/27	0.166087	0.386787	5.73742	10.3001	PAGR1	.
Amide Transport (GO:0042886)	1/27	0.166087	0.386787	5.73742	10.3001	DISP1	.
Peptide Hormone Secretion (GO:0030072)	1/27	0.166087	0.386787	5.73742	10.3001	SNX19	.
Phagocytosis, Engulfment (GO:0006911)	1/27	0.166087	0.386787	5.73742	10.3001	CLCN2	.
Plasma Membrane Invagination (GO:0099024)	1/27	0.166087	0.386787	5.73742	10.3001	CLCN2	.
Regulation of G1/S Transition of Mitotic Cell Cycle (GO:2000045)	2/111	0.170561	0.390549	2.74632	4.85731	TCF7L1;BCL7C	.
Regulation of Lipid Biosynthetic Process (GO:0046890)	1/28	0.171682	0.390549	5.52464	9.73503	MLST8	.
Negative Regulation of Protein Transport (GO:0051224)	1/28	0.171682	0.390549	5.52464	9.73503	ADTRP	.
Positive Regulation of Signal Transduction by P53 Class Mediator (GO:1901798)	1/28	0.171682	0.390549	5.52464	9.73503	ZNF385A	.
Nuclear Membrane Organization (GO:0071763)	1/28	0.171682	0.390549	5.52464	9.73503	CHMP7	.
Regulation of Tyrosine Phosphorylation of STAT Protein (GO:0042509)	1/28	0.171682	0.390549	5.52464	9.73503	CSF1R	.
Positive Regulation of ATP Metabolic Process (GO:1903580)	1/28	0.171682	0.390549	5.52464	9.73503	MLST8	.
Mitotic Cell Cycle Phase Transition (GO:0044772)	2/113	0.175331	0.397532	2.69656	4.69493	ENSA;CHMP7	.
Regulation of Dendrite Morphogenesis (GO:0048814)	1/29	0.17724	0.400316	5.32707	9.21717	HECW1	.
Double-Strand Break Repair via Homologous Recombination (GO:0000724)	2/114	0.177724	0.400316	2.67235	4.61654	SWSAP1;ERCC5	.
Lamellipodium Organization (GO:0097581)	1/30	0.18276	0.400697	5.14312	8.74114	PHPT1	.
Positive Regulation of B Cell Proliferation (GO:0030890)	1/30	0.18276	0.400697	5.14312	8.74114	TCF7L1	.
Multivesicular Body Assembly (GO:0036258)	1/30	0.18276	0.400697	5.14312	8.74114	CHMP7	.
Negative Regulation of Antigen Receptor-Mediated Signaling Pathway (GO:0050858)	1/30	0.18276	0.400697	5.14312	8.74114	PHPT1	.
Negative Regulation of Cell Differentiation (GO:0045596)	3/220	0.183474	0.400697	2.07363	3.51622	BCL7C;LRP3;MEN1	.
Cytoskeleton Organization (GO:0007010)	2/117	0.184934	0.400697	2.60224	4.39195	MLST8;RHOU	.
Negative Regulation of Canonical Wnt Signaling Pathway (GO:0090090)	2/117	0.184934	0.400697	2.60224	4.39195	HECW1;PFDN5	.
Golgi to Plasma Membrane Protein Transport (GO:0043001)	1/31	0.188244	0.400697	4.97143	8.30237	KIF13A	.
Regulation of Protein Localization to Cell Surface (GO:2000008)	1/31	0.188244	0.400697	4.97143	8.30237	COMMD1	.
Nuclear-Transcribed mRNA Catabolic Process, Deadenylation-Dependent Decay (GO:0000288)	1/31	0.188244	0.400697	4.97143	8.30237	DCPS	.
Nucleoside Phosphate Metabolic Process (GO:0006753)	1/31	0.188244	0.400697	4.97143	8.30237	NUDT5	.
Regulation of Spindle Assembly (GO:0090169)	1/31	0.188244	0.400697	4.97143	8.30237	CHMP7	.
Multivesicular Body Organization (GO:0036257)	1/31	0.188244	0.400697	4.97143	8.30237	CHMP7	.
Regulation of Centrosome Duplication (GO:0010824)	1/31	0.188244	0.400697	4.97143	8.30237	CEP131	.
Regulation of Transforming Growth Factor Beta Receptor Signaling Pathway (GO:0017015)	2/120	0.192185	0.400697	2.5357	4.18211	SNW1;MEN1	.
Mitotic Sister Chromatid Segregation (GO:0000070)	2/120	0.192185	0.400697	2.5357	4.18211	TUBG2;CHMP7	.
Negative Regulation of Fat Cell Differentiation (GO:0045599)	1/32	0.193691	0.400697	4.81082	7.89691	LRP3	.
Extrinsic Apoptotic Signaling Pathway via Death Domain Receptors (GO:0008625)	1/32	0.193691	0.400697	4.81082	7.89691	DIABLO	.
TOR Signaling (GO:0031929)	1/32	0.193691	0.400697	4.81082	7.89691	MLST8	.
Regulation of Metaphase/Anaphase Transition of Cell Cycle (GO:1902099)	1/32	0.193691	0.400697	4.81082	7.89691	BCL7C	.
Apoptotic Mitochondrial Changes (GO:0008637)	1/32	0.193691	0.400697	4.81082	7.89691	NAIF1	.
Non-Motile Cilium Assembly (GO:1905515)	1/32	0.193691	0.400697	4.81082	7.89691	CC2D2A	.
Nuclear Receptor-Mediated Signaling Pathway (GO:0141193)	1/32	0.193691	0.400697	4.81082	7.89691	SNW1	.
Protein Transmembrane Import Into Intracellular Organelle (GO:0044743)	1/32	0.193691	0.400697	4.81082	7.89691	DNLZ	.
Respiratory System Development (GO:0060541)	1/32	0.193691	0.400697	4.81082	7.89691	DISP1	.
Chondrocyte Differentiation (GO:0002062)	1/32	0.193691	0.400697	4.81082	7.89691	SNX19	.
Response to Steroid Hormone (GO:0048545)	1/32	0.193691	0.400697	4.81082	7.89691	ADTRP	.
Negative Regulation of DNA-binding Transcription Factor Activity (GO:0043433)	2/122	0.19704	0.400697	2.49318	4.04979	COMMD1;MEN1	.
Epithelial Tube Morphogenesis (GO:0060562)	1/33	0.199102	0.400697	4.66024	7.52134	CSF1R	.
Ub-dep Prot Cat Proc via Multivsiclr Bdy Sorting Pway (GO:0043162)	1/33	0.199102	0.400697	4.66024	7.52134	CHMP7	.
Protein Localization to Chromatin (GO:0071168)	1/33	0.199102	0.400697	4.66024	7.52134	CHMP7	.
Rescue of Stalled Ribosome (GO:0072344)	1/33	0.199102	0.400697	4.66024	7.52134	RNF25	.
Positive Regulation of Notch Signaling Pathway (GO:0045747)	1/33	0.199102	0.400697	4.66024	7.52134	ENHO	.
Regulation of G0 to G1 Transition (GO:0070316)	1/33	0.199102	0.400697	4.66024	7.52134	BCL7C	.
Negative Regulation of JNK Cascade (GO:0046329)	1/33	0.199102	0.400697	4.66024	7.52134	MEN1	.
Positive Regulation of Cell Development (GO:0010720)	1/33	0.199102	0.400697	4.66024	7.52134	SNW1	.
Response to Cytokine (GO:0034097)	2/123	0.199474	0.400697	2.47245	3.98577	CSF1R;ALDH1A2	.
Regulation of RNA Biosynthetic Process (GO:2001141)	5/465	0.202136	0.402509	1.63515	2.61431	ZNF274;TCF7L1;KAT6B;CXXC1;PFDN5	.
Translation (GO:0006412)	3/232	0.203862	0.402509	1.96377	3.123	MRPL30;MRPS17;GSPT2	.
Apoptotic Process (GO:0006915)	3/232	0.203862	0.402509	1.96377	3.123	DIABLO;TNFSF12;ZNF385A	.
Calcium Ion Import (GO:0070509)	1/34	0.204477	0.402509	4.5188	7.17269	TRPC4	.
Cellular Response to Osmotic Stress (GO:0071470)	1/34	0.204477	0.402509	4.5188	7.17269	MLST8	.
Regulation of DNA Damage Response, Signal Transduction by P53 Class Mediator (GO:0043516)	1/34	0.204477	0.402509	4.5188	7.17269	ZNF385A	.
Positive Regulation of Carbohydrate Metabolic Process (GO:0045913)	1/34	0.204477	0.402509	4.5188	7.17269	MLST8	.
Positive Regulation of Angiogenesis (GO:0045766)	2/126	0.206795	0.405909	2.41227	3.8018	TNFSF12;FGF1	.
Negative Regulation of Osteoblast Differentiation (GO:0045668)	1/35	0.209816	0.408339	4.38567	6.84833	MEN1	.
Regulation of Neuronal Synaptic Plasticity (GO:0048168)	1/35	0.209816	0.408339	4.38567	6.84833	SYP	.
Skeletal Muscle Organ Development (GO:0060538)	1/35	0.209816	0.408339	4.38567	6.84833	DISP1	.
Negative Regulation of Apoptotic Process (GO:0043066)	5/475	0.214009	0.409489	1.59954	2.46607	TOX3;MGMT;MLST8;VSTM2L;ERCC5	.
Regulation of Neuron Apoptotic Process (GO:0043523)	2/129	0.214145	0.409489	2.35493	3.62918	TOX3;VSTM2L	.
'De Novo' Post-Translational Protein Folding (GO:0051084)	1/36	0.21512	0.409489	4.26015	6.54598	HSPA1L	.
Regulation of Cytosolic Calcium Ion Concentration (GO:0051480)	1/36	0.21512	0.409489	4.26015	6.54598	TRPC4	.
Negative Regulation of Plasma Membrane Bounded Cell Projection Assembly (GO:0120033)	1/36	0.21512	0.409489	4.26015	6.54598	EVL	.
Cellular Response to Heat (GO:0034605)	1/36	0.21512	0.409489	4.26015	6.54598	FGF1	.
Sister Chromatid Segregation (GO:0000819)	1/36	0.21512	0.409489	4.26015	6.54598	TUBG2	.
Positive Regulation of Macromolecule Biosynthetic Process (GO:0010557)	4/355	0.215175	0.409489	1.71072	2.62818	LRP3;FAM98B;ADTRP;MED26	.
Intrinsic Apoptotic Signaling Pathway by P53 Class Mediator (GO:0072332)	1/37	0.220388	0.414812	4.1416	6.26363	SNW1	.
Nucleobase-Containing Compound Metabolic Process (GO:0006139)	1/37	0.220388	0.414812	4.1416	6.26363	NUDT5	.
Melanosome Organization (GO:0032438)	1/37	0.220388	0.414812	4.1416	6.26363	KIF13A	.
Microtubule Polymerization (GO:0046785)	1/37	0.220388	0.414812	4.1416	6.26363	TUBG2	.
Neuron Projection Guidance (GO:0097485)	2/132	0.22152	0.415804	2.30023	3.46701	EFNA2;EVL	.
Positive Regulation of Cell Population Proliferation (GO:0008284)	5/484	0.224882	0.417794	1.56876	2.34086	CSF1R;BCL7C;CEP131;FAM98B;FGF1	.
Regulation of Intracellular Protein Transport (GO:0033157)	1/38	0.225621	0.417794	4.02947	5.99947	CEP131	.
Regulation of Sprouting Angiogenesis (GO:1903670)	1/38	0.225621	0.417794	4.02947	5.99947	FGF1	.
Male Meiotic Nuclear Division (GO:0007140)	1/38	0.225621	0.417794	4.02947	5.99947	SHCBP1L	.
Membrane Assembly (GO:0071709)	1/38	0.225621	0.417794	4.02947	5.99947	CHMP7	.
Vacuolar Transport (GO:0007034)	1/39	0.230819	0.42	3.92323	5.75193	VPS51	.
Interstrand Cross-Link Repair (GO:0036297)	1/39	0.230819	0.42	3.92323	5.75193	EXO5	.
Positive Regulation of Extrinsic Apoptotic Signaling Pathway (GO:2001238)	1/39	0.230819	0.42	3.92323	5.75193	TNFSF12	.
Regulation of Protein Phosphorylation (GO:0001932)	2/137	0.233856	0.42	2.21448	3.21775	CSF1R;MEN1	.
Establishment of Protein Localization to Extracellular Region (GO:0035592)	1/40	0.235983	0.42	3.82244	5.51959	TANGO6	.
Positive Regulation of Lipid Biosynthetic Process (GO:0046889)	1/40	0.235983	0.42	3.82244	5.51959	MLST8	.
G2/M Transition of Mitotic Cell Cycle (GO:0000086)	1/40	0.235983	0.42	3.82244	5.51959	ENSA	.
Regulation of Filopodium Assembly (GO:0051489)	1/40	0.235983	0.42	3.82244	5.51959	TENM2	.
Fibroblast Growth Factor Receptor Signaling Pathway (GO:0008543)	1/40	0.235983	0.42	3.82244	5.51959	FGF1	.
Negative Regulation of Protein Secretion (GO:0050709)	1/40	0.235983	0.42	3.82244	5.51959	ADTRP	.
Positive Regulation of Stem Cell Population Maintenance (GO:1902459)	1/40	0.235983	0.42	3.82244	5.51959	BCL7C	.
Regulation of DNA Binding (GO:0051101)	1/40	0.235983	0.42	3.82244	5.51959	HABP4	.
Regulation of T Cell Receptor Signaling Pathway (GO:0050856)	1/40	0.235983	0.42	3.82244	5.51959	PHPT1	.
Ribosome Disassembly (GO:0032790)	1/40	0.235983	0.42	3.82244	5.51959	RNF25	.
Negative Regulation of Cell-Cell Adhesion (GO:0022408)	1/40	0.235983	0.42	3.82244	5.51959	ADTRP	.
Regulation of Cytoskeleton Organization (GO:0051493)	2/139	0.238803	0.423641	2.18193	3.12478	CSF1R;MLST8	.
Establishment of Protein Localization to Plasma Membrane (GO:0061951)	1/41	0.241112	0.423641	3.72669	5.3012	KIF13A	.
Negative Regulation of Secretion by Cell (GO:1903531)	1/41	0.241112	0.423641	3.72669	5.3012	ADTRP	.
Regulation of Mitotic Spindle Organization (GO:0060236)	1/41	0.241112	0.423641	3.72669	5.3012	CHMP7	.
Positive Regulation of Actin Filament Polymerization (GO:0030838)	1/41	0.241112	0.423641	3.72669	5.3012	EVL	.
Regulation of Glycolytic Process (GO:0006110)	1/42	0.246207	0.426225	3.63561	5.09562	MLST8	.
Positive Regulation of Neuron Differentiation (GO:0045666)	1/42	0.246207	0.426225	3.63561	5.09562	TCF7L1	.
Membrane Fission (GO:0090148)	1/42	0.246207	0.426225	3.63561	5.09562	CHMP7	.
Cellular Response to Retinoic Acid (GO:0071300)	1/42	0.246207	0.426225	3.63561	5.09562	SNW1	.
Regulation of Chromosome Organization (GO:0033044)	1/42	0.246207	0.426225	3.63561	5.09562	SHCBP1L	.
Positive Regulation of Gene Expression, Epigenetic (GO:0141137)	1/43	0.251268	0.426225	3.54887	4.90183	MEN1	.
Synaptic Vesicle Exocytosis (GO:0016079)	1/43	0.251268	0.426225	3.54887	4.90183	SNAP47	.
Ephrin Receptor Signaling Pathway (GO:0048013)	1/43	0.251268	0.426225	3.54887	4.90183	EFNA2	.
Regulation of Dendrite Development (GO:0050773)	1/43	0.251268	0.426225	3.54887	4.90183	HECW1	.
Regulation of Epithelial Cell Migration (GO:0010632)	1/43	0.251268	0.426225	3.54887	4.90183	EVL	.
Import Into the Mitochondrion (GO:0170036)	1/43	0.251268	0.426225	3.54887	4.90183	DNLZ	.
Positive Regulation of Stress Fiber Assembly (GO:0051496)	1/43	0.251268	0.426225	3.54887	4.90183	EVL	.
Cell Cycle G2/M Phase Transition (GO:0044839)	1/43	0.251268	0.426225	3.54887	4.90183	ENSA	.
Regulation of Chemokine Production (GO:0032642)	1/43	0.251268	0.426225	3.54887	4.90183	CSF1R	.
Negative Regulation of Protein Metabolic Process (GO:0051248)	2/146	0.256153	0.427366	2.07513	2.82628	PCIF1;PFDN5	.
Negative Regulation of Wnt Signaling Pathway (GO:0030178)	2/146	0.256153	0.427366	2.07513	2.82628	HECW1;PFDN5	.
Negative Regulation of Protein Localization (GO:1903828)	1/44	0.256295	0.427366	3.46617	4.71893	COMMD1	.
Negative Regulation of Protein Modification Process (GO:0031400)	1/44	0.256295	0.427366	3.46617	4.71893	MEN1	.
Response to Unfolded Protein (GO:0006986)	1/44	0.256295	0.427366	3.46617	4.71893	HSPA1L	.
Positive Regulation of Cell Cycle G1/S Phase Transition (GO:1902808)	1/44	0.256295	0.427366	3.46617	4.71893	PAGR1	.
Positive Regulation of Cell Division (GO:0051781)	1/44	0.256295	0.427366	3.46617	4.71893	FGF1	.
Endothelial Cell Migration (GO:0043542)	1/45	0.261289	0.431503	3.38722	4.54608	TNFSF12	.
Establishment of Protein Localization to Mitochondrion (GO:0072655)	1/45	0.261289	0.431503	3.38722	4.54608	DNLZ	.
Cellular Response to Ketone (GO:1901655)	1/45	0.261289	0.431503	3.38722	4.54608	CXXC1	.
Regulation of B Cell Proliferation (GO:0030888)	1/45	0.261289	0.431503	3.38722	4.54608	TCF7L1	.
Regulation of Cyclin-Dependent Protein Serine/Threonine Kinase Activity (GO:0000079)	1/46	0.266249	0.434473	3.31178	4.38255	MEN1	.
Negative Regulation of Protein Serine/Threonine Kinase Activity (GO:0071901)	1/46	0.266249	0.434473	3.31178	4.38255	MEN1	.
Protein Localization to Cilium (GO:0061512)	1/46	0.266249	0.434473	3.31178	4.38255	CC2D2A	.
Peptidyl-Tyrosine Modification (GO:0018212)	1/46	0.266249	0.434473	3.31178	4.38255	CSF1R	.
Mononuclear Cell Differentiation (GO:1903131)	1/46	0.266249	0.434473	3.31178	4.38255	CSF1R	.
Axon Guidance (GO:0007411)	2/152	0.271045	0.439383	1.99152	2.59986	EFNA2;EVL	.
Monoatomic Anion Transport (GO:0006820)	1/47	0.271177	0.439383	3.23962	4.22765	CLCN2	.
Positive Regulation of Chromosome Organization (GO:2001252)	1/47	0.271177	0.439383	3.23962	4.22765	SHCBP1L	.
Positive Regulation of ERK1 and ERK2 Cascade (GO:0070374)	2/153	0.273527	0.442149	1.97823	2.56448	CSF1R;FGF1	.
Positive Regulation of Osteoblast Differentiation (GO:0045669)	1/48	0.276071	0.445214	3.17053	4.08078	LRP3	.
Positive Regulation of Intracellular Transport (GO:0032388)	1/49	0.280933	0.446566	3.10432	3.94137	CEP131	.
Translational Elongation (GO:0006414)	1/49	0.280933	0.446566	3.10432	3.94137	RNF25	.
Actin Polymerization or Depolymerization (GO:0008154)	1/49	0.280933	0.446566	3.10432	3.94137	EVL	.
Activation of Protein Kinase Activity (GO:0032147)	1/49	0.280933	0.446566	3.10432	3.94137	FGF1	.
Proteoglycan Biosynthetic Process (GO:0030166)	1/49	0.280933	0.446566	3.10432	3.94137	EXTL1	.
Negative Regulation of Cellular Process (GO:0048523)	5/531	0.284034	0.446566	1.42512	1.79374	BCL7C;ALDH1A2;NAIF1;NUPR2;MEN1	.
tRNA Processing (GO:0008033)	1/50	0.285763	0.446566	3.04082	3.8089	FAM98B	.
Negative Regulation of Phosphorylation (GO:0042326)	1/50	0.285763	0.446566	3.04082	3.8089	MEN1	.
Myelination (GO:0042552)	1/50	0.285763	0.446566	3.04082	3.8089	TMEM163	.
Cognition (GO:0050890)	1/50	0.285763	0.446566	3.04082	3.8089	DGCR2	.
Positive Regulation of Fat Cell Differentiation (GO:0045600)	1/50	0.285763	0.446566	3.04082	3.8089	ZNF385A	.
Actin Filament Organization (GO:0007015)	2/158	0.285932	0.446566	1.91434	2.39675	EVL;RHOU	.
Neuron Development (GO:0048666)	2/159	0.28841	0.446566	1.90205	2.36495	TENM2;ATXN10	.
Transcription Initiation-Coupled Chromatin Remodeling (GO:0045815)	1/51	0.29056	0.446566	2.97985	3.68293	MEN1	.
Positive Regulation of Nervous System Development (GO:0051962)	1/51	0.29056	0.446566	2.97985	3.68293	SNW1	.
Regulation of Intracellular Transport (GO:0032386)	1/51	0.29056	0.446566	2.97985	3.68293	DYNLT2B	.
Regulation of Mitotic Metaphase/Anaphase Transition (GO:0030071)	1/51	0.29056	0.446566	2.97985	3.68293	BCL7C	.
Inorganic Anion Transport (GO:0015698)	1/51	0.29056	0.446566	2.97985	3.68293	CLCN2	.
Autophagosome Maturation (GO:0097352)	1/51	0.29056	0.446566	2.97985	3.68293	CHMP7	.
Regulation of Ubiquitin-Dependent Protein Catabolic Process (GO:2000058)	1/51	0.29056	0.446566	2.97985	3.68293	COMMD1	.
Positive Regulation of Actin Filament Bundle Assembly (GO:0032233)	1/51	0.29056	0.446566	2.97985	3.68293	EVL	.
Glycoprotein Metabolic Process (GO:0009100)	1/52	0.295326	0.449652	2.92127	3.56301	ENGASE	.
Intrinsic Apoptotic Signaling Pathway in Response to DNA Damage (GO:0008630)	1/52	0.295326	0.449652	2.92127	3.56301	SNW1	.
Sensory Perception (GO:0007600)	1/52	0.295326	0.449652	2.92127	3.56301	KCNK4	.
Regulation of Cell Development (GO:0060284)	1/52	0.295326	0.449652	2.92127	3.56301	KAT6B	.
+ Reg of Phosphatidylinositol 3-Kinase/Prot Kinase B Signal Transduction (GO:0051897)	2/162	0.295841	0.449652	1.8661	2.27278	CSF1R;ADTRP	.
B Cell Differentiation (GO:0030183)	1/53	0.300059	0.453057	2.86495	3.44876	TCF7L1	.
Negative Regulation of Immune System Process (GO:0002683)	1/53	0.300059	0.453057	2.86495	3.44876	ADTRP	.
Positive Regulation of B Cell Activation (GO:0050871)	1/53	0.300059	0.453057	2.86495	3.44876	TCF7L1	.
mRNA Destabilization (GO:0061157)	1/54	0.304761	0.458142	2.81075	3.33981	DCPS	.
Positive Regulation of Chemokine Production (GO:0032722)	1/54	0.304761	0.458142	2.81075	3.33981	CSF1R	.
Rho Protein Signal Transduction (GO:0007266)	1/55	0.309432	0.461128	2.75856	3.23584	CTNNAL1	.
Regulation of Peptide Hormone Secretion (GO:0090276)	1/55	0.309432	0.461128	2.75856	3.23584	ENSA	.
Nucleus Organization (GO:0006997)	1/55	0.309432	0.461128	2.75856	3.23584	CHMP7	.
Metaphase Chromosome Alignment (GO:0051310)	1/55	0.309432	0.461128	2.75856	3.23584	CHMP7	.
Positive Regulation of Leukocyte Chemotaxis (GO:0002690)	1/56	0.314072	0.461308	2.70827	3.13654	CSF1R	.
Regulation of Proteasomal Protein Catabolic Process (GO:0061136)	1/56	0.314072	0.461308	2.70827	3.13654	COMMD1	.
Nucleosome Assembly (GO:0006334)	1/56	0.314072	0.461308	2.70827	3.13654	KAT6B	.
Regulation of Stem Cell Population Maintenance (GO:2000036)	1/56	0.314072	0.461308	2.70827	3.13654	BCL7C	.
Cellular Response to Fibroblast Growth Factor Stimulus (GO:0044344)	1/56	0.314072	0.461308	2.70827	3.13654	FGF1	.
Sulfur Compound Biosynthetic Process (GO:0044272)	1/56	0.314072	0.461308	2.70827	3.13654	EXTL1	.
Positive Regulation of RNA Biosynthetic Process (GO:1902680)	5/555	0.315364	0.461308	1.36124	1.57091	TCF7L1;KAT6B;NCOA6;CXXC1;PCBD2	.
Regulation of Macromolecule Biosynthetic Process (GO:0010556)	2/170	0.315597	0.461308	1.77652	2.04884	PRDM4;CAVIN4	.
Brain Development (GO:0007420)	2/170	0.315597	0.461308	1.77652	2.04884	VPS51;NCOA6	.
Cartilage Development (GO:0051216)	1/57	0.31868	0.462899	2.65977	3.04163	SNX19	.
Myeloid Cell Differentiation (GO:0030099)	1/57	0.31868	0.462899	2.65977	3.04163	NCOA6	.
Cell Surface Receptor Protein Tyrosine Kinase Signaling Pathway (GO:0007169)	3/296	0.318706	0.462899	1.52982	1.74932	CSF1R;EFNA2;FGF1	.
Positive Regulation of Cell Differentiation (GO:0045597)	3/297	0.320539	0.463629	1.52454	1.73454	TCF7L1;LRP3;ZNF385A	.
Membrane Organization (GO:0061024)	2/173	0.322976	0.463629	1.74508	1.97225	SYP;CHMP7	.
Regulation of Multicellular Organismal Development (GO:2000026)	1/58	0.323258	0.463629	2.61298	2.95085	KAT6B	.
Peptidyl-Tyrosine Phosphorylation (GO:0018108)	1/58	0.323258	0.463629	2.61298	2.95085	CSF1R	.
Muscle Organ Development (GO:0007517)	1/58	0.323258	0.463629	2.61298	2.95085	SGCA	.
Sprouting Angiogenesis (GO:0002040)	1/58	0.323258	0.463629	2.61298	2.95085	ADTRP	.
Positive Regulation of DNA-binding Transcription Factor Activity (GO:0051091)	2/174	0.325431	0.465773	1.73485	1.94755	TCF7L1;RNF25	.
Protein Homotetramerization (GO:0051289)	1/59	0.327806	0.467225	2.5678	2.86396	ALDH1A2	.
Renal System Development (GO:0072001)	1/59	0.327806	0.467225	2.5678	2.86396	IFT25	.
Fatty Acid Catabolic Process (GO:0009062)	1/60	0.332323	0.469765	2.52415	2.78073	ADTRP	.
Protein Targeting to Mitochondrion (GO:0006626)	1/60	0.332323	0.469765	2.52415	2.78073	DNLZ	.
Response to Reactive Oxygen Species (GO:0000302)	1/60	0.332323	0.469765	2.52415	2.78073	TXNRD2	.
Positive Regulation of Cell Cycle (GO:0045787)	1/60	0.332323	0.469765	2.52415	2.78073	TCF7L1	.
Regulation of Apoptotic Process (GO:0042981)	6/704	0.333381	0.470293	1.28725	1.414	TOX3;DIABLO;MGMT;MLST8;ERCC5;FBXO10	.
Organelle Organization (GO:0006996)	4/437	0.336357	0.473186	1.38092	1.50462	VPS51;MLST8;RHOU;CHMP7	.
post-Golgi Vesicle-Mediated Transport (GO:0006892)	1/61	0.336809	0.473186	2.48195	2.70096	COMMD1	.
Metal Ion Transport (GO:0030001)	2/180	0.340114	0.476524	1.67586	1.80737	TRPC4;KCNK4	.
ATP Metabolic Process (GO:0046034)	1/62	0.341266	0.476524	2.44114	2.62445	NUDT5	.
protein-DNA Complex Assembly (GO:0065004)	1/62	0.341266	0.476524	2.44114	2.62445	KAT6B	.
Positive Regulation of Peptidyl-Tyrosine Phosphorylation (GO:0050731)	1/63	0.345694	0.479781	2.40165	2.55104	CSF1R	.
Canonical Wnt Signaling Pathway (GO:0060070)	1/63	0.345694	0.479781	2.40165	2.55104	TCF7L1	.
Spliceosomal Complex Assembly (GO:0000245)	1/63	0.345694	0.479781	2.40165	2.55104	PRPF6	.
Negative Regulation of Cell Migration (GO:0030336)	2/184	0.349849	0.481025	1.63869	1.72104	EVL;ADTRP	.
Positive Regulation of Neurogenesis (GO:0050769)	1/64	0.350091	0.481025	2.36341	2.48054	SNW1	.
Monocarboxylic Acid Biosynthetic Process (GO:0072330)	1/64	0.350091	0.481025	2.36341	2.48054	ALDH1A2	.
Retinoid Metabolic Process (GO:0001523)	1/64	0.350091	0.481025	2.36341	2.48054	ALDH1A2	.
Endocytic Recycling (GO:0032456)	1/64	0.350091	0.481025	2.36341	2.48054	VPS51	.
Regulation of Extrinsic Apoptotic Signaling Pathway (GO:2001236)	1/65	0.35446	0.483162	2.32636	2.41281	TNFSF12	.
Chloride Transmembrane Transport (GO:1902476)	1/65	0.35446	0.483162	2.32636	2.41281	GLRB	.
Negative Regulation of NF-kappaB Transcription Factor Activity (GO:0032088)	1/65	0.35446	0.483162	2.32636	2.41281	COMMD1	.
Negative Regulation of Autophagy (GO:0010507)	1/65	0.35446	0.483162	2.32636	2.41281	MLST8	.
Regulation of Neurogenesis (GO:0050767)	1/66	0.358799	0.484552	2.29046	2.3477	SNW1	.
Cell-Cell Junction Organization (GO:0045216)	1/66	0.358799	0.484552	2.29046	2.3477	CSF1R	.
Positive Regulation of MAP Kinase Activity (GO:0043406)	1/66	0.358799	0.484552	2.29046	2.3477	FGF1	.
Negative Regulation of Binding (GO:0051100)	1/66	0.358799	0.484552	2.29046	2.3477	HABP4	.
Regulation of Cell Cycle (GO:0051726)	3/318	0.359005	0.484552	1.42137	1.45608	TCF7L1;NUPR2;MEN1	.
Neurogenesis (GO:0022008)	1/67	0.363109	0.487149	2.25564	2.28508	FGF1	.
Cell-Cell Junction Assembly (GO:0007043)	1/67	0.363109	0.487149	2.25564	2.28508	GJB1	.
Chordate Embryonic Development (GO:0043009)	1/67	0.363109	0.487149	2.25564	2.28508	ALDH1A2	.
Ubiquitin-Dependent Protein Catabolic Process (GO:0006511)	4/455	0.363767	0.487149	1.32458	1.33947	RNF25;HECW1;FBXO10;CHMP7	.
Action Potential (GO:0001508)	1/68	0.367391	0.491046	2.22186	2.22481	KCNK4	.
Protein-Containing Complex Assembly (GO:0065003)	3/323	0.368134	0.491083	1.39881	1.39784	DNLZ;PFDN5;CENPC	.
Positive Regulation of Intracellular Protein Transport (GO:0090316)	1/69	0.371644	0.493848	2.18908	2.16679	CEP131	.
Regulation of Translational Initiation (GO:0006446)	1/69	0.371644	0.493848	2.18908	2.16679	HABP4	.
Positive Regulation of Apoptotic Signaling Pathway (GO:2001235)	1/70	0.375868	0.497232	2.15724	2.1109	TNFSF12	.
Positive Regulation of Endothelial Cell Proliferation (GO:0001938)	1/70	0.375868	0.497232	2.15724	2.1109	TNFSF12	.
Regulation of Programmed Cell Death (GO:0043067)	2/195	0.376362	0.497232	1.54443	1.50923	TOX3;FBXO10	.
Endomembrane System Organization (GO:0010256)	2/196	0.378751	0.497342	1.53639	1.49165	VPS51;SYP	.
Positive Regulation of Protein Polymerization (GO:0032273)	1/71	0.380065	0.497342	2.12632	2.05703	EVL	.
Phagocytosis (GO:0006909)	1/71	0.380065	0.497342	2.12632	2.05703	CLCN2	.
Response to Ionizing Radiation (GO:0010212)	1/71	0.380065	0.497342	2.12632	2.05703	MEN1	.
Regulation of Actin Filament Polymerization (GO:0030833)	1/71	0.380065	0.497342	2.12632	2.05703	EVL	.
Kidney Development (GO:0001822)	1/72	0.384233	0.499939	2.09626	2.00509	IFT25	.
Regulation of G Protein-Coupled Receptor Signaling Pathway (GO:0008277)	1/72	0.384233	0.499939	2.09626	2.00509	SYP	.
Monoatomic Anion Transmembrane Transport (GO:0098656)	1/72	0.384233	0.499939	2.09626	2.00509	GLRB	.
Axonogenesis (GO:0007409)	2/200	0.38827	0.500586	1.50505	1.42386	EFNA2;EVL	.
Positive Regulation of Protein Transport (GO:0051222)	1/73	0.388373	0.500586	2.06704	1.95498	CEP131	.
Neuropeptide Signaling Pathway (GO:0007218)	1/73	0.388373	0.500586	2.06704	1.95498	GLRB	.
Regulation of MAP Kinase Activity (GO:0043405)	1/73	0.388373	0.500586	2.06704	1.95498	FGF1	.
Positive Regulation of TOR Signaling (GO:0032008)	1/73	0.388373	0.500586	2.06704	1.95498	MLST8	.
Regulation of Translation (GO:0006417)	2/201	0.39064	0.501625	1.49741	1.40752	PCIF1;ZNF385A	.
Regulation of Cell Differentiation (GO:0045595)	2/201	0.39064	0.501625	1.49741	1.40752	BCL7C;APLF	.
Positive Regulation of Cytoskeleton Organization (GO:0051495)	1/74	0.392486	0.502784	2.03862	1.90663	EVL	.
Positive Regulation of Protein Metabolic Process (GO:0051247)	2/202	0.393006	0.502784	1.48985	1.39142	TNFSF12;PCIF1	.
Positive Regulation of Protein Serine/Threonine Kinase Activity (GO:0071902)	1/75	0.396572	0.503595	2.01097	1.85995	FGF1	.
Regulation of Plasma Membrane Bounded Cell Projection Assembly (GO:0120032)	1/75	0.396572	0.503595	2.01097	1.85995	DYNLT2B	.
Regulation of Stress Fiber Assembly (GO:0051492)	1/75	0.396572	0.503595	2.01097	1.85995	EVL	.
Plasma Membrane Organization (GO:0007009)	1/75	0.396572	0.503595	2.01097	1.85995	CHMP7	.
Positive Regulation of Protein Ubiquitination (GO:0031398)	1/76	0.40063	0.504089	1.98406	1.81485	COMMD1	.
Negative Regulation of Supramolecular Fiber Organization (GO:1902904)	1/76	0.40063	0.504089	1.98406	1.81485	PFDN5	.
Regulation of Neuron Differentiation (GO:0045664)	1/76	0.40063	0.504089	1.98406	1.81485	TCF7L1	.
Lymphocyte Differentiation (GO:0030098)	1/76	0.40063	0.504089	1.98406	1.81485	TCF7L1	.
Regulation of Notch Signaling Pathway (GO:0008593)	1/76	0.40063	0.504089	1.98406	1.81485	ENHO	.
Positive Regulation of Lymphocyte Proliferation (GO:0050671)	1/77	0.404661	0.506379	1.95786	1.77128	TCF7L1	.
Nucleosome Organization (GO:0034728)	1/77	0.404661	0.506379	1.95786	1.77128	KAT6B	.
Cellular Response to Hypoxia (GO:0071456)	1/77	0.404661	0.506379	1.95786	1.77128	MLST8	.
Positive Regulation of Cell Migration (GO:0030335)	3/344	0.406189	0.507366	1.31125	1.18136	CSF1R;SUN2;FGF1	.
Cellular Response to Decreased Oxygen Levels (GO:0036294)	1/78	0.408665	0.509534	1.93233	1.72916	MLST8	.
Positive Regulation of Growth (GO:0045927)	1/79	0.412643	0.512632	1.90746	1.68843	MLST8	.
Positive Regulation of Protein Modification by Small Protein Conjugation or Removal (GO:1903322)	1/79	0.412643	0.512632	1.90746	1.68843	COMMD1	.
Regulation of Angiogenesis (GO:0045765)	2/211	0.414109	0.513525	1.42504	1.25635	TNFSF12;FGF1	.
Protein Stabilization (GO:0050821)	2/212	0.416432	0.514748	1.41818	1.24237	SWSAP1;DNLZ	.
Regulation of TOR Signaling (GO:0032006)	1/80	0.416594	0.514748	1.88322	1.64903	MLST8	.
Positive Regulation of Organelle Organization (GO:0010638)	1/81	0.420518	0.518664	1.85959	1.6109	SHCBP1L	.
Inorganic Anion Transmembrane Transport (GO:0098661)	1/82	0.424416	0.521692	1.83654	1.57399	GLRB	.
Regulation of Canonical Wnt Signaling Pathway (GO:0060828)	2/216	0.425677	0.521692	1.39139	1.18835	HECW1;PFDN5	.
Regulation of Cilium Assembly (GO:1902017)	1/83	0.428289	0.521692	1.81405	1.53824	DYNLT2B	.
Wnt Signaling Pathway (GO:0016055)	1/83	0.428289	0.521692	1.81405	1.53824	TCF7L1	.
Negative Regulation of Protein Phosphorylation (GO:0001933)	1/83	0.428289	0.521692	1.81405	1.53824	MEN1	.
Organophosphate Metabolic Process (GO:0019637)	1/83	0.428289	0.521692	1.81405	1.53824	NUDT5	.
Protein Tetramerization (GO:0051262)	1/83	0.428289	0.521692	1.81405	1.53824	ALDH1A2	.
Vascular Transport (GO:0010232)	1/84	0.432135	0.524109	1.7921	1.5036	LRP3	.
Monoatomic Cation Homeostasis (GO:0055080)	1/84	0.432135	0.524109	1.7921	1.5036	COMMD1	.
Regulation of Phosphatidylinositol 3-Kinase/Protein Kinase B Signal Transduction (GO:0051896)	2/219	0.432562	0.524109	1.37195	1.14973	CSF1R;ADTRP	.
Long-Chain Fatty Acid Metabolic Process (GO:0001676)	1/85	0.435956	0.526365	1.77068	1.47004	ADTRP	.
Peptidyl-Lysine Modification (GO:0018205)	1/85	0.435956	0.526365	1.77068	1.47004	EEF1AKMT1	.
Regulation of Cell Growth (GO:0001558)	2/222	0.439403	0.528163	1.35303	1.11265	NAIF1;MLST8	.
Transport Across Blood-Brain Barrier (GO:0150104)	1/86	0.439751	0.528163	1.74976	1.43751	LRP3	.
Regulation of Organelle Assembly (GO:1902115)	1/86	0.439751	0.528163	1.74976	1.43751	DYNLT2B	.
Regulation of ERK1 and ERK2 Cascade (GO:0070372)	2/223	0.441673	0.528805	1.34684	1.10062	CSF1R;FGF1	.
Regulation of Endothelial Cell Proliferation (GO:0001936)	1/87	0.443521	0.528805	1.72932	1.40596	TNFSF12	.
Calcium Ion Transmembrane Transport (GO:0070588)	1/87	0.443521	0.528805	1.72932	1.40596	TRPC4	.
Positive Regulation of Biosynthetic Process (GO:0009891)	1/87	0.443521	0.528805	1.72932	1.40596	MLST8	.
Positive Regulation of Intracellular Signal Transduction (GO:1902533)	5/652	0.444135	0.528805	1.15135	0.934465	CSF1R;SNW1;MLST8;ADTRP;FGF1	.
Regulation of Endothelial Cell Migration (GO:0010594)	1/88	0.447266	0.529778	1.70936	1.37536	FGF1	.
Positive Regulation of Protein Kinase Activity (GO:0045860)	1/88	0.447266	0.529778	1.70936	1.37536	CSF1R	.
Positive Regulation of Endothelial Cell Migration (GO:0010595)	1/88	0.447266	0.529778	1.70936	1.37536	FGF1	.
Nuclear-Transcribed mRNA Catabolic Process (GO:0000956)	1/89	0.450985	0.532349	1.68985	1.34566	DCPS	.
Cellular Response to Hormone Stimulus (GO:0032870)	1/89	0.450985	0.532349	1.68985	1.34566	ADTRP	.
Positive Regulation of Plasma Membrane Bounded Cell Projection Assembly (GO:0120034)	1/90	0.45468	0.534872	1.67078	1.31684	TENM2	.
Protein Dephosphorylation (GO:0006470)	1/90	0.45468	0.534872	1.67078	1.31684	PHPT1	.
Regulation of Epithelial to Mesenchymal Transition (GO:0010717)	1/91	0.45835	0.538268	1.65213	1.28886	APLF	.
RNA Splicing (GO:0008380)	1/92	0.461996	0.541623	1.63389	1.26169	PRPF6	.
Regulation of Insulin Secretion (GO:0050796)	1/93	0.465617	0.544012	1.61605	1.2353	ENSA	.
Regulation of Protein Metabolic Process (GO:0051246)	1/93	0.465617	0.544012	1.61605	1.2353	PCIF1	.
Negative Regulation of Cell Population Proliferation (GO:0008285)	3/379	0.467988	0.545432	1.18706	0.901353	ALDH1A2;NUPR2;MEN1	.
Positive Regulation of Phosphorylation (GO:0042327)	1/94	0.469214	0.545432	1.59859	1.20965	CSF1R	.
Lipid Biosynthetic Process (GO:0008610)	1/94	0.469214	0.545432	1.59859	1.20965	PDSS2	.
Gene Expression (GO:0010467)	3/381	0.471439	0.547092	1.18066	0.887818	MRPL30;MRPS17;GSPT2	.
Retrograde Transport, Endosome to Golgi (GO:0042147)	1/95	0.472787	0.547241	1.58151	1.18472	VPS51	.
Negative Regulation of Programmed Cell Death (GO:0043069)	3/382	0.47316	0.547241	1.17749	0.881137	MGMT;MLST8;ERCC5	.
B Cell Activation (GO:0042113)	1/96	0.476336	0.549989	1.56478	1.16049	TCF7L1	.
Regulation of mRNA Splicing, via Spliceosome (GO:0048024)	1/97	0.479862	0.552203	1.5484	1.13692	SNW1	.
Muscle Contraction (GO:0006936)	1/97	0.479862	0.552203	1.5484	1.13692	SGCA	.
Positive Regulation of Protein Modification Process (GO:0031401)	1/98	0.483364	0.554376	1.53236	1.114	CSF1R	.
Positive Regulation of Supramolecular Fiber Organization (GO:1902905)	1/98	0.483364	0.554376	1.53236	1.114	EVL	.
Positive Regulation of Protein Catabolic Process (GO:0045732)	1/99	0.486842	0.556507	1.51665	1.09171	TNFSF12	.
Cytosolic Transport (GO:0016482)	1/99	0.486842	0.556507	1.51665	1.09171	VPS51	.
Cellular Response to Chemical Stress (GO:0062197)	1/100	0.490298	0.559526	1.50125	1.07001	MLST8	.
Regulation of RNA Splicing (GO:0043484)	1/104	0.503889	0.574083	1.44266	0.988798	HABP4	.
Positive Regulation of NF-kappaB Transcription Factor Activity (GO:0051092)	1/105	0.507231	0.576933	1.42872	0.969798	RNF25	.
Positive Regulation of Signal Transduction (GO:0009967)	2/256	0.513615	0.581569	1.16989	0.779474	ENHO;FGF1	.
Dephosphorylation (GO:0016311)	1/107	0.513846	0.581569	1.40162	0.93324	PHPT1	.
Positive Regulation of Cell Growth (GO:0030307)	1/107	0.513846	0.581569	1.40162	0.93324	MLST8	.
Regulation of Proteasomal Ubiquitin-Dependent Protein Catabolic Process (GO:0032434)	1/109	0.520374	0.587988	1.37552	0.898502	COMMD1	.
Regulation of MAPK Cascade (GO:0043408)	2/260	0.521918	0.588765	1.15152	0.748766	CSF1R;FGF1	.
Negative Regulation of Developmental Process (GO:0051093)	1/111	0.526814	0.591375	1.35038	0.865465	BCL7C	.
External Encapsulating Structure Organization (GO:0045229)	1/111	0.526814	0.591375	1.35038	0.865465	MATN2	.
Extracellular Structure Organization (GO:0043062)	1/111	0.526814	0.591375	1.35038	0.865465	MATN2	.
Regulation of Wnt Signaling Pathway (GO:0030111)	1/112	0.530002	0.593983	1.33814	0.849551	TCF7L1	.
Regulation of Protein Ubiquitination (GO:0031396)	1/113	0.533169	0.596559	1.32613	0.834024	COMMD1	.
Negative Regulation of Growth (GO:0045926)	1/115	0.539439	0.60064	1.30273	0.804078	NAIF1	.
Intrinsic Apoptotic Signaling Pathway (GO:0097193)	1/115	0.539439	0.60064	1.30273	0.804078	DIABLO	.
Regulation of JNK Cascade (GO:0046328)	1/115	0.539439	0.60064	1.30273	0.804078	MEN1	.
Positive Regulation of Epithelial Cell Proliferation (GO:0050679)	1/118	0.548688	0.609949	1.26913	0.761767	TNFSF12	.
MAPK Cascade (GO:0000165)	1/119	0.55173	0.61234	1.25832	0.748317	MEN1	.
Negative Regulation of Catabolic Process (GO:0009895)	1/120	0.554751	0.6147	1.24768	0.735177	MLST8	.
Enzyme-Linked Receptor Protein Signaling Pathway (GO:0007167)	1/121	0.557752	0.616038	1.23722	0.722338	CSF1R	.
Negative Regulation of Cell Growth (GO:0030308)	1/121	0.557752	0.616038	1.23722	0.722338	NAIF1	.
Calcium Ion Transport (GO:0006816)	1/126	0.572459	0.630399	1.18743	0.662364	TRPC4	.
Potassium Ion Transport (GO:0006813)	1/127	0.575342	0.630399	1.17794	0.651157	KCNK4	.
Monocarboxylic Acid Metabolic Process (GO:0032787)	1/127	0.575342	0.630399	1.17794	0.651157	ALDH1A2	.
Regulation of Anatomical Structure Morphogenesis (GO:0022603)	1/127	0.575342	0.630399	1.17794	0.651157	HECW1	.
Negative Regulation of MAPK Cascade (GO:0043409)	1/127	0.575342	0.630399	1.17794	0.651157	MEN1	.
Golgi Organization (GO:0007030)	1/128	0.578205	0.631522	1.16861	0.640195	VPS51	.
RNA Biosynthetic Process (GO:0032774)	1/128	0.578205	0.631522	1.16861	0.640195	NCOA6	.
Regulation of Protein Catabolic Process (GO:0042176)	1/129	0.58105	0.633621	1.15942	0.629472	TNFSF12	.
RNA Processing (GO:0006396)	2/291	0.583017	0.634687	1.02637	0.553767	PRPF6;PCIF1	.
Regulation of DNA Repair (GO:0006282)	1/130	0.583875	0.634687	1.15038	0.618981	BCL7C	.
Circulatory System Development (GO:0072359)	1/132	0.589469	0.639755	1.1327	0.598669	NCOA6	.
Potassium Ion Transmembrane Transport (GO:0071805)	1/134	0.594988	0.644726	1.11555	0.579211	KCNK4	.
Receptor-Mediated Endocytosis (GO:0006898)	1/136	0.600433	0.649603	1.09891	0.56056	LRP3	.
protein-RNA Complex Assembly (GO:0022618)	1/138	0.605806	0.654385	1.08276	0.542675	PRPF6	.
Monoatomic Cation Transmembrane Transport (GO:0098655)	2/304	0.606891	0.654527	0.981537	0.490186	TRPC4;KCNK4	.
Membraneless Organelle Assembly (GO:0140694)	1/139	0.608465	0.655197	1.07486	0.534007	CENPC	.
Intracellular Calcium Ion Homeostasis (GO:0006874)	1/140	0.611107	0.655985	1.06707	0.525516	TRPC4	.
Protein Autophosphorylation (GO:0046777)	1/140	0.611107	0.655985	1.06707	0.525516	CSF1R	.
Inorganic Cation Transmembrane Transport (GO:0098662)	2/307	0.612252	0.656044	0.971734	0.476743	TRPC4;KCNK4	.
Cellular Response to Starvation (GO:0009267)	1/141	0.613731	0.656044	1.0594	0.517197	NUPR2	.
Protein Transport (GO:0015031)	2/308	0.614027	0.656044	0.968509	0.472357	TANGO6;KIF13A	.
Protein Homooligomerization (GO:0051260)	1/143	0.618926	0.660252	1.04437	0.501057	ALDH1A2	.
Regulation of Cell Migration (GO:0030334)	3/479	0.62592	0.666678	0.932869	0.437079	CSF1R;SUN2;FGF1	.
Protein Modification by Small Protein Conjugation (GO:0032446)	2/316	0.628004	0.667862	0.943447	0.438899	RNF25;FBXO10	.
Phosphate-Containing Compound Metabolic Process (GO:0006796)	1/150	0.63657	0.675925	0.994954	0.449382	NUDT5	.
Regulation of Small GTPase Mediated Signal Transduction (GO:0051056)	1/157	0.653402	0.692727	0.949971	0.404273	RHOU	.
Epithelium Development (GO:0060429)	1/159	0.658067	0.696598	0.937851	0.392442	ALDH1A2	.
Skeletal System Development (GO:0001501)	1/160	0.660377	0.697967	0.931905	0.38669	EXTL1	.
Macroautophagy (GO:0016236)	1/162	0.664949	0.70172	0.920235	0.375498	CHMP7	.
Supramolecular Fiber Organization (GO:0097435)	2/339	0.666013	0.701765	0.878024	0.356869	EVL;RHOU	.
Heart Development (GO:0007507)	1/171	0.684779	0.719333	0.871119	0.329857	NCOA6	.
Positive Regulation of Protein Phosphorylation (GO:0001934)	1/171	0.684779	0.719333	0.871119	0.329857	CSF1R	.
Intracellular Signaling Cassette (GO:0141124)	2/354	0.68909	0.722755	0.839962	0.312788	GUCY1A2;MEN1	.
Positive Regulation of MAPK Cascade (GO:0043410)	2/362	0.700858	0.733978	0.82096	0.29181	CSF1R;FGF1	.
Negative Regulation of Gene Expression (GO:0010629)	2/364	0.703742	0.735876	0.81634	0.286816	PCIF1;LRP3	.
Neuron Differentiation (GO:0030182)	1/181	0.70545	0.736541	0.822306	0.286919	TENM2	.
Extracellular Matrix Organization (GO:0030198)	1/182	0.707441	0.737499	0.817721	0.283014	MATN2	.
Positive Regulation of Catabolic Process (GO:0009896)	1/183	0.709419	0.738441	0.813187	0.279174	TNFSF12	.
Protein Ubiquitination (GO:0016567)	2/369	0.710852	0.738813	0.805012	0.274743	RNF25;FBXO10	.
Small GTPase-mediated Signal Transduction (GO:0007264)	1/188	0.719112	0.746269	0.791243	0.260902	CTNNAL1	.
Anterograde Trans-Synaptic Signaling (GO:0098916)	1/189	0.721012	0.747112	0.786994	0.257425	GLRB	.
Cellular Response to Oxygen-Containing Compound (GO:1901701)	2/384	0.731337	0.75667	0.772807	0.241796	SNW1;KCNK4	.
Transcription by RNA Polymerase II (GO:0006366)	1/200	0.741087	0.765604	0.743076	0.222654	MED26	.
Negative Regulation of Macromolecule Biosynthetic Process (GO:0010558)	1/202	0.744579	0.768057	0.735608	0.216957	LRP3	.
DNA-templated Transcription (GO:0006351)	1/203	0.746308	0.768686	0.731929	0.214175	NCOA6	.
Neuron Projection Development (GO:0031175)	1/206	0.751425	0.772798	0.721108	0.206081	ATXN10	.
Regulation of Signal Transduction (GO:0009966)	1/211	0.759727	0.779659	0.703759	0.193391	TCF7L1	.
Positive Regulation of Multicellular Organismal Process (GO:0051240)	2/407	0.760366	0.779659	0.728058	0.199455	BCL7C;CXXC1	.
Protein Metabolic Process (GO:0019538)	3/614	0.783617	0.802303	0.721693	0.175974	MRPL30;MRPS17;GSPT2	.
Protein Polyubiquitination (GO:0000209)	1/228	0.785947	0.80349	0.650492	0.156682	RNF25	.
Regulation of Autophagy (GO:0010506)	1/230	0.788838	0.805248	0.644745	0.15293	MLST8	.
Negative Regulation of Multicellular Organismal Process (GO:0051241)	1/243	0.806711	0.822271	0.609706	0.130958	EVL	.
Positive Regulation of Developmental Process (GO:0051094)	1/245	0.809324	0.823712	0.604647	0.127916	BCL7C	.
Positive Regulation of Programmed Cell Death (GO:0043068)	1/248	0.813178	0.826411	0.597212	0.123506	DIABLO	.
Cytokine-Mediated Signaling Pathway (GO:0019221)	1/255	0.821873	0.834013	0.580546	0.113885	CSF1R	.
Chemical Synaptic Transmission (GO:0007268)	1/260	0.827836	0.838772	0.569193	0.107543	GLRB	.
Inflammatory Response (GO:0006954)	1/261	0.829005	0.838772	0.566975	0.106324	CSF1R	.
Central Nervous System Development (GO:0007417)	1/288	0.857748	0.866281	0.512929	0.0787061	NCOA6	.
Cellular Response to Cytokine Stimulus (GO:0071345)	1/289	0.858715	0.866281	0.511122	0.0778529	CSF1R	.
Positive Regulation of Apoptotic Process (GO:0043065)	1/313	0.880063	0.886515	0.471226	0.0602048	DIABLO	.
Positive Regulation of Cytokine Production (GO:0001819)	1/325	0.889503	0.89416	0.453495	0.0531008	CSF1R	.
Intracellular Protein Transport (GO:0006886)	1/326	0.890256	0.89416	0.452076	0.0525524	KIF13A	.
Protein Localization (GO:0008104)	1/371	0.919338	0.921777	0.39618	0.0333194	KIF13A	.
Protein Phosphorylation (GO:0006468)	1/373	0.920435	0.921777	0.394009	0.0326668	CSF1R	.
Protein Modification Process (GO:0036211)	1/545	0.975636	0.975636	0.267056	0.00658724	PHPT1	.

## Sheet: Table S4
Supplementary File, Table S4. The complete list of the functional enrichment analysis results for brown module.
Biological Process	Overlap	P.value	Adjusted.P.value	Odds.Ratio	Combined.Score	Genes			KEGG Pathway	Overlap	P.value	Adjusted.P.value	Odds.Ratio	Combined.Score	Genes
Response to Endoplasmic Reticulum Stress (GO:0034976)	10/196	3.69504e-06	0.00416431	7.14037	89.3154	ERO1A;PPP1R15A;TBL2;SELENOS;ATP2A2;UFD1;DNAJB9;ANKZF1;RNF121;UBE2J1	.		Protein processing in endoplasmic reticulum	9/171	8.9196e-06	0.00133794	7.33781	85.3186	ERO1A;PPP1R15A;LMAN1;TRAM1;SELENOS;UFD1;SEC24D;SEC23B;UBE2J1	.
Regulation of T-helper 17 Cell Differentiation (GO:2000319)	3/10	5.57329e-05	0.0314055	54.8433	537.187	NFKBIZ;ZC3H12A;MALT1	.		Sulfur metabolism	2/10	0.00267699	0.200774	31.7853	188.266	SELENBP1;ETHE1	.
ERAD Pathway (GO:0036503)	6/91	8.46954e-05	0.0318172	9.17508	86.0296	SELENOS;UFD1;DNAJB9;ANKZF1;RNF121;UBE2J1	.		PI3K-Akt signaling pathway	8/354	0.00722709	0.299717	3.00516	14.8152	PDGFRB;CSF3;CCND2;COL1A2;IBSP;CD19;EPHA2;FGFR1	.
Antigen Receptor-Mediated Signaling Pathway (GO:0050851)	6/114	0.000291996	0.0770126	7.21272	58.7027	CD19;ZC3H12A;NFKBIZ;CSK;THY1;MALT1	.		Cytokine-cytokine receptor interaction	7/295	0.00912551	0.299717	3.14749	14.7828	CSF3;CD4;IFNGR2;CXCL3;ACVR2B;CCR10;CXCL5	.
Retrograde Protein Transport, ER to Cytosol (GO:0030970)	3/18	0.000361781	0.0770126	25.5832	202.734	SELENOS;HM13;UFD1	.		Parathyroid hormone synthesis, secretion and action	4/106	0.00999055	0.299717	5.02674	23.1537	NR4A2;EGR1;FGFR1;HBEGF	.
Cellular Response to Molecule of Bacterial Origin (GO:0071219)	6/123	0.000438976	0.0770126	6.65486	51.4491	SELENOS;TNIP1;TNIP3;ZC3H12A;HMGB2;CXCL5	.		Epithelial cell signaling in Helicobacter pylori infection	3/70	0.0180029	0.44964	5.71257	22.9486	CSK;CXCL3;HBEGF	.
Cellular Response to Lipopolysaccharide (GO:0071222)	6/125	0.000478339	0.0770126	6.54235	50.0175	SELENOS;TNIP1;TNIP3;ZC3H12A;HMGB2;CXCL5	.		Complement and coagulation cascades	3/85	0.0298352	0.44964	4.66404	16.3804	CFD;PROCR;CFI	.
T Cell Receptor Signaling Pathway (GO:0050852)	5/88	0.000667453	0.0853965	7.77975	56.8858	NFKBIZ;ZC3H12A;CSK;THY1;MALT1	.		Human T-cell leukemia virus 1 infection	5/219	0.0301557	0.44964	2.99737	10.4949	CCNA2;EGR1;CD4;CCND2;MSX2	.
Positive Regulation of Intracellular Signal Transduction (GO:1902533)	14/652	0.00068196	0.0853965	2.92642	21.3352	PDGFRB;PPP1R15A;TOR2A;CSF3;SLC20A1;TRAT1;MALT1;OASL;CD4;CD19;S100A4;ZBTB7B;FGFR1;HBEGF	.		Starch and sucrose metabolism	2/36	0.0327839	0.44964	7.46908	25.528	MGAM;ENPP3	.
Regulation of Protein Deubiquitination (GO:0090085)	2/6	0.000911066	0.102677	63.5833	445.14	TNIP1;ZC3H12A	.		Primary immunodeficiency	2/38	0.0362113	0.44964	7.05342	23.4059	CD4;CD19	.
Protein Exit From Endoplasmic Reticulum (GO:0032527)	3/26	0.00110055	0.112756	16.678	113.61	LMAN1;SELENOS;UFD1	.		IL-17 signaling pathway	3/94	0.0384857	0.44964	4.20085	13.6841	CSF3;CXCL3;CXCL5	.
Response to Lipopolysaccharide (GO:0032496)	6/161	0.00178027	0.167197	5.01367	31.7415	SELENOS;TNIP1;TNIP3;ZC3H12A;HMGB2;CXCL5	.		JAK-STAT signaling pathway	4/162	0.0397677	0.44964	3.2359	10.4348	PDGFRB;CSF3;CCND2;IFNGR2	.
Bile Acid Metabolic Process (GO:0008206)	3/32	0.00202799	0.175811	13.2234	81.9942	NPC1;OSBP;AKR1C4	.		Hematopoietic cell lineage	3/99	0.0437843	0.44964	3.98105	12.4546	CSF3;CD4;CD19	.
Positive Regulation of T-helper 17 Cell Differentiation (GO:2000321)	2/10	0.00267699	0.201131	31.7853	188.266	NFKBIZ;MALT1	.		Viral protein interaction with cytokine and cytokine receptor	3/100	0.0448856	0.44964	3.93981	12.2277	CXCL3;CCR10;CXCL5	.
Cyclic Nucleotide Transport (GO:0070729)	2/10	0.00267699	0.201131	31.7853	188.266	SLC46A2;LRRC8A	.		Amoebiasis	3/102	0.0471292	0.44964	3.85982	11.7912	ARG2;COL1A2;CXCL3	.
Protein N-linked Glycosylation via Asparagine (GO:0018279)	3/37	0.00308664	0.217415	11.2759	65.1823	DPAGT1;B4GALNT2;UBE2J1	.		Human papillomavirus infection	6/331	0.0479616	0.44964	2.37049	7.2	PDGFRB;CCNA2;CCND2;COL1A2;IBSP;OASL	.
Cell Chemotaxis (GO:0060326)	4/78	0.00339852	0.218962	6.93857	39.4417	PDGFRB;HMGB2;EPHA2;HBEGF	.		TNF signaling pathway	3/112	0.0591535	0.485448	3.50394	9.9078	MLKL;CXCL3;CXCL5	.
Proteolysis Involved in Protein Catabolic Process (GO:0051603)	4/80	0.00372269	0.218962	6.7553	37.7845	HM13;GZMA;MALT1;ANKZF1	.		Arginine and proline metabolism	2/50	0.05937	0.485448	5.28686	14.9299	ARG2;SRM	.
Positive Regulation of T-helper Cell Differentiation (GO:0045624)	2/12	0.00388575	0.218962	25.4256	141.124	NFKBIZ;MALT1	.		Riboflavin metabolism	1/8	0.0614901	0.485448	18.0482	50.3343	ENPP3	.
Response to Misfolded Protein (GO:0051788)	2/12	0.00388575	0.218962	25.4256	141.124	UFD1;DNAJB14	.		Hedgehog signaling pathway	2/56	0.0724106	0.491827	4.69801	12.3342	CCND2;DHH	.
Positive Regulation of T-helper 17 Type Immune Response (GO:2000318)	2/13	0.00456851	0.234033	23.1131	124.546	NFKBIZ;MALT1	.		Pyrimidine metabolism	2/56	0.0724106	0.491827	4.69801	12.3342	ENTPD4;ENPP3	.
Positive Regulation of Chromosome Separation (GO:1905820)	2/13	0.00456851	0.234033	23.1131	124.546	INCENP;NCAPG2	.		Cell cycle	3/124	0.075281	0.491827	3.15452	8.15925	CCNA2;CCND2;ORC1	.
Intracellular Cholesterol Transport (GO:0032367)	2/14	0.00530241	0.237659	21.1859	111.006	NPC1;OSBP	.		Focal adhesion	4/201	0.0754135	0.491827	2.59015	6.69494	PDGFRB;CCND2;COL1A2;IBSP	.
Positive Regulation of Calcium Ion Transmembrane Transport (GO:1904427)	3/45	0.00538353	0.237659	9.12442	47.6697	TOR2A;CD19;THY1	.		Lysosome	3/128	0.0810465	0.50654	3.05295	7.67126	NPC1;ENTPD4;HYAL3	.
Regulation of Canonical NF-kappaB Signal Transduction (GO:0043122)	7/270	0.00573424	0.237659	3.45109	17.8121	CD4;TNIP1;SLC20A1;TNIP3;ZC3H12A;S100A4;MALT1	.		Natural killer cell mediated cytotoxicity	3/131	0.0854927	0.512956	2.98095	7.33112	IFNGR2;CD48;CD244	.
Negative Regulation of Macrophage Activation (GO:0043031)	2/15	0.00608659	0.237659	19.5552	99.7643	ZC3H12A;CST7	.		Central carbon metabolism in cancer	2/70	0.105858	0.610721	3.72813	8.37209	PDGFRB;FGFR1	.
Cellular Response to Misfolded Protein (GO:0071218)	2/15	0.00608659	0.237659	19.5552	99.7643	UFD1;DNAJB14	.		Melanoma	2/72	0.110928	0.616264	3.62125	7.96268	PDGFRB;FGFR1	.
Antimicrobial Humoral Response (GO:0019730)	5/147	0.00627971	0.237659	4.53374	22.988	TOR2A;LYZ;CXCL3;CXCL5;JCHAIN	.		Nitrogen metabolism	1/17	0.126185	0.63369	7.89252	16.3375	CA12	.
Negative Regulation of Tumor Necrosis Factor Production (GO:0032720)	3/48	0.0064499	0.237659	8.51484	42.9462	ARG2;SELENOS;ZC3H12A	.		Primary bile acid biosynthesis	1/17	0.126185	0.63369	7.89252	16.3375	AKR1C4	.
COPII-coated Vesicle Cargo Loading (GO:0090110)	2/16	0.00692022	0.237659	18.1575	90.3029	SEC24D;SEC23B	.		RNA degradation	2/79	0.129141	0.63369	3.29088	6.73592	BTG1;DCP1A	.
Endoplasmic Reticulum to Cytosol Transport (GO:1903513)	2/16	0.00692022	0.237659	18.1575	90.3029	SELENOS;UFD1	.		B cell receptor signaling pathway	2/81	0.134467	0.63369	3.20724	6.43511	CD19;MALT1	.
Intracellular Sterol Transport (GO:0032366)	2/16	0.00692022	0.237659	18.1575	90.3029	NPC1;OSBP	.		Glycosaminoglycan degradation	1/19	0.139949	0.63369	7.01486	13.7946	HYAL3	.
Negative Regulation of Tumor Necrosis Factor Superfamily Cytokine Production (GO:1903556)	3/50	0.00722576	0.237659	8.15168	40.1886	ARG2;SELENOS;ZC3H12A	.		ECM-receptor interaction	2/88	0.153474	0.63369	2.94514	5.51985	COL1A2;IBSP	.
Positive Regulation of Macromolecule Biosynthetic Process (GO:0010557)	8/355	0.00734543	0.237659	2.99635	14.7231	PDGFRB;EGR1;TOR2A;ZC3H12A;RAB27A;SLC26A9;ZBTB7B;FER1L6	.		Pantothenate and CoA biosynthesis	1/21	0.153497	0.63369	6.31274	11.8305	ENPP3	.
Organic Hydroxy Compound Transport (GO:0015850)	3/51	0.0076335	0.237659	7.98145	38.9112	NPC1;OSBP;AKR1C4	.		PD-L1 expression and PD-1 checkpoint pathway in cancer	2/89	0.156231	0.63369	2.91114	5.40429	CD4;IFNGR2	.
B Cell Proliferation (GO:0042100)	2/17	0.00780249	0.237659	16.9462	82.245	CD19;GAPT	.		Arginine biosynthesis	1/22	0.160192	0.63369	6.01183	11.01	ARG2	.
Eye Photoreceptor Cell Development (GO:0042462)	2/17	0.00780249	0.237659	16.9462	82.245	THY1;MAPRE2	.		Th1 and Th2 cell differentiation	2/92	0.164559	0.63369	2.81368	5.07725	CD4;IFNGR2	.
Positive Regulation of Reactive Oxygen Species Metabolic Process (GO:2000379)	3/52	0.00805459	0.238882	7.81817	37.6954	PDGFRB;ZC3H12A;RAB27A	.		GnRH signaling pathway	2/93	0.167352	0.63369	2.78261	4.97436	EGR1;HBEGF	.
Negative Regulation of Endoplasmic Reticulum Unfolded Protein Response (GO:1900102)	2/18	0.00873258	0.24604	15.8862	75.3117	PPP1R15A;DNAJB9	.		Rheumatoid arthritis	2/93	0.167352	0.63369	2.78261	4.97436	CXCL3;CXCL5	.
Regulation of Lymphocyte Activation (GO:0051249)	2/18	0.00873258	0.24604	15.8862	75.3117	CD4;CD19	.		Staphylococcus aureus infection	2/95	0.172963	0.63369	2.7225	4.77711	CFD;CFI	.
+ Reg of Phosphatidylinositol 3-Kinase/Prot Kinase B Signal Transduction (GO:0051897)	5/162	0.00935524	0.246337	4.09746	19.1426	PDGFRB;CSF3;CD19;FGFR1;HBEGF	.		Prostate cancer	2/97	0.178604	0.63369	2.66491	4.59054	PDGFRB;FGFR1	.
Regulation of Actin Cytoskeleton Organization (GO:0032956)	4/104	0.00935956	0.246337	5.12779	23.9537	PDGFRB;CSF3;PEAK3;RHOF	.		AGE-RAGE signaling pathway in diabetic complications	2/100	0.187118	0.63369	2.58294	4.32905	EGR1;COL1A2	.
Interferon-Mediated Signaling Pathway (GO:0140888)	3/55	0.00939885	0.246337	7.366	34.3784	IFI27;IFNGR2;OASL	.		Pancreatic secretion	2/102	0.192826	0.63369	2.53103	4.16599	CLCA2;ATP2A2	.
Regulation of RIG-I Signaling Pathway (GO:0039535)	2/19	0.00970969	0.248701	14.951	69.2923	UFD1;OASL	.		Transcriptional misregulation in cancer	3/192	0.194292	0.63369	2.0126	3.29742	CCNA2;CCND2;NFKBIZ	.
Cellular Response to Interleukin-1 (GO:0071347)	3/57	0.0103634	0.259545	7.09247	32.4089	EGR1;HYAL3;ZC3H12A	.		Chemokine signaling pathway	3/192	0.194292	0.63369	2.0126	3.29742	CXCL3;CCR10;CXCL5	.
Cellular Response to Fatty Acid (GO:0071398)	2/20	0.010733	0.259874	14.1197	64.0246	ZC3H12A;AKR1C4	.		T cell receptor signaling pathway	2/104	0.198556	0.63369	2.48115	4.01123	CD4;MALT1	.
Cellular Response to Lipid (GO:0071396)	6/234	0.0108377	0.259874	3.39578	15.3649	SELENOS;TNIP1;TNIP3;ZC3H12A;HMGB2;CXCL5	.		NF-kappa B signaling pathway	2/104	0.198556	0.63369	2.48115	4.01123	CXCL3;MALT1	.
Negative Regulation of Canonical NF-kappaB Signal Transduction (GO:0043124)	3/61	0.0124591	0.28432	6.602	28.9518	TNIP1;TNIP3;ZC3H12A	.		Th17 cell differentiation	2/107	0.20719	0.647467	2.40989	3.79346	CD4;IFNGR2	.
Membrane Protein Ectodomain Proteolysis (GO:0006509)	2/22	0.0129153	0.28432	12.7064	55.2645	HM13;ERAP1	.		Epstein-Barr virus infection	3/202	0.214594	0.649332	1.91049	2.94025	CCNA2;CCND2;CD19	.
Intrinsic Apoptotic Signaling Pathway (GO:0097193)	4/115	0.0131698	0.28432	4.61706	19.9911	ERO1A;PPP1R15A;IFI27;EPHA2	.		Galactose metabolism	1/31	0.218123	0.649332	4.20637	6.40503	MGAM	.
Positive Regulation of Cell-Substrate Junction Organization (GO:0150117)	2/23	0.0140727	0.28432	12.1007	51.5917	THY1;MAPRE2	.		Proteoglycans in cancer	3/205	0.220773	0.649332	1.88183	2.84273	COL1A2;FGFR1;HBEGF	.
Purine Ribonucleotide Transport (GO:0015868)	2/23	0.0140727	0.28432	12.1007	51.5917	SLC46A2;LRRC8A	.		Leukocyte transendothelial migration	2/114	0.227476	0.654197	2.25847	3.34414	CLDN15;THY1	.
Modulation by Host of Viral Genome Replication (GO:0044827)	2/23	0.0140727	0.28432	12.1007	51.5917	IFI27;ZC3H12A	.		Rap1 signaling pathway	3/210	0.23115	0.654197	1.8359	2.68903	PDGFRB;EPHA2;FGFR1	.
Protein N-linked Glycosylation (GO:0006487)	3/64	0.0141787	0.28432	6.27636	26.7123	DPAGT1;B4GALNT2;UBE2J1	.		Nicotinate and nicotinamide metabolism	1/35	0.242578	0.673827	3.71075	5.25603	ENPP3	.
Adenine Nucleotide Transport (GO:0051503)	2/24	0.0152732	0.28432	11.5501	48.2986	SLC46A2;LRRC8A	.		Purine metabolism	2/129	0.271305	0.70638	1.99021	2.59625	ENTPD4;ENPP3	.
Enzyme-Linked Receptor Protein Signaling Pathway (GO:0007167)	4/121	0.0156103	0.28432	4.37895	18.2157	PDGFRB;CD4;ACVR2B;EPHA2	.		Relaxin signaling pathway	2/129	0.271305	0.70638	1.99021	2.59625	COL1A2;INSL3	.
Bile Acid Biosynthetic Process (GO:0006699)	2/25	0.0165162	0.28432	11.0474	45.332	OSBP;AKR1C4	.		Coronavirus disease	3/232	0.277717	0.70638	1.65767	2.12373	CFD;CSF3;HBEGF	.
Chaperone Cofactor-Dependent Protein Refolding (GO:0051085)	2/25	0.0165162	0.28432	11.0474	45.332	ERO1A;DNAJB14	.		Ras signaling pathway	3/232	0.277717	0.70638	1.65767	2.12373	PDGFRB;EPHA2;FGFR1	.
Negative Regulation of Axonogenesis (GO:0050771)	2/25	0.0165162	0.28432	11.0474	45.332	SEMA3G;THY1	.		Bladder cancer	1/41	0.277843	0.70638	3.15318	4.03828	HBEGF	.
Cellular Response to Topologically Incorrect Protein (GO:0035967)	2/26	0.0178009	0.28432	10.5865	42.648	UFD1;DNAJB14	.		Calcium signaling pathway	3/240	0.294899	0.7124	1.60106	1.95509	PDGFRB;ATP2A2;FGFR1	.
Diterpenoid Metabolic Process (GO:0016101)	2/26	0.0178009	0.28432	10.5865	42.648	RDH11;AKR1C4	.		Carbohydrate digestion and absorption	1/47	0.311476	0.7124	2.74107	3.19728	MGAM	.
Sterol Transport (GO:0015918)	2/26	0.0178009	0.28432	10.5865	42.648	NPC1;OSBP	.		Signaling pathways regulating pluripotency of stem cells	2/143	0.312174	0.7124	1.79133	2.08545	ACVR2B;FGFR1	.
Positive Regulation of Interleukin-2 Production (GO:0032743)	2/26	0.0178009	0.28432	10.5865	42.648	CD4;MALT1	.		Intestinal immune network for IgA production	1/48	0.316928	0.7124	2.68261	3.08254	CCR10	.
Positive Regulation of Endothelial Cell Proliferation (GO:0001938)	3/70	0.0180029	0.28432	5.71257	22.9486	FGFBP1;HMGB2;FGFR1	.		Cell adhesion molecules	2/148	0.326672	0.7124	1.72954	1.935	CD4;CLDN15	.
Regulation of Chromosome Segregation (GO:0051983)	2/27	0.0191264	0.28432	10.1626	40.21	NCAPG2;ZNF207	.		Vibrio cholerae infection	1/50	0.327704	0.7124	2.57286	2.8704	ERO1A	.
Spindle Assembly (GO:0051225)	3/73	0.0201093	0.28432	5.46691	21.3569	INCENP;ZNF207;MAPRE2	.		Cholesterol metabolism	1/50	0.327704	0.7124	2.57286	2.8704	NPC1	.
Myeloid Leukocyte Differentiation (GO:0002573)	3/74	0.0208403	0.28432	5.38964	20.8626	CSF3;CD4;EPHA2	.		Cysteine and methionine metabolism	1/50	0.327704	0.7124	2.57286	2.8704	SRM	.
Positive Regulation of Defense Response to Virus by Host (GO:0002230)	2/29	0.0218976	0.28432	9.40883	35.9547	DTX3L;ZC3H12A	.		Malaria	1/50	0.327704	0.7124	2.57286	2.8704	CSF3	.
Positive Regulation of Gene Expression (GO:0010628)	8/436	0.0227488	0.28432	2.41919	9.15238	RBM3;EGR1;TOR2A;ZC3H12A;RAB27A;SLC26A9;ZBTB7B;FER1L6	.		N-Glycan biosynthesis	1/50	0.327704	0.7124	2.57286	2.8704	DPAGT1	.
Positive Regulation of Calcium Ion Transport (GO:0051928)	2/30	0.0233418	0.28432	9.07234	34.0894	PDGFRB;TOR2A	.		Glycosaminoglycan biosynthesis	1/53	0.343552	0.722587	2.42406	2.5899	CHST4	.
Positive Regulation of Calcium-Mediated Signaling (GO:0050850)	2/30	0.0233418	0.28432	9.07234	34.0894	PDGFRB;TRAT1	.		Cellular senescence	2/156	0.349696	0.722587	1.63903	1.72211	CCNA2;CCND2	.
Positive Regulation of Response to Wounding (GO:1903036)	2/30	0.0233418	0.28432	9.07234	34.0894	INSL3;HBEGF	.		Necroptosis	2/159	0.358264	0.722587	1.60746	1.65004	MLKL;IFNGR2	.
Intrinsic Apoptotic Signaling Pathway in Response to Endoplasmic Reticulum Stress (GO:0070059)	2/30	0.0233418	0.28432	9.07234	34.0894	ERO1A;PPP1R15A	.		Glutathione metabolism	1/57	0.364106	0.722587	2.25045	2.27366	SRM	.
Pyroptotic Inflammatory Response (GO:0070269)	2/30	0.0233418	0.28432	9.07234	34.0894	IFI27;GZMA	.		Legionellosis	1/57	0.364106	0.722587	2.25045	2.27366	CXCL3	.
Positive Regulation of Protein Modification by Small Protein Conjugation or Removal (GO:1903322)	3/79	0.0247122	0.28432	5.03379	18.6273	TNIP1;ZC3H12A;MALT1	.		Notch signaling pathway	1/59	0.374142	0.722587	2.17263	2.13596	DTX3L	.
Positive Regulation of Cellular Process (GO:0048522)	10/622	0.0261369	0.28432	2.12308	7.73736	PDGFRB;CSF3;ARG2;CCND2;IBSP;ZC3H12A;CST7;CXCL5;FGFR1;HBEGF	.		Wnt signaling pathway	2/166	0.378094	0.722587	1.53831	1.49618	CCND2;PRICKLE3	.
B Cell Activation Involved in Immune Response (GO:0002312)	2/32	0.0263438	0.28432	8.46667	30.7892	CD19;GAPT	.		Mineral absorption	1/60	0.379101	0.722587	2.1357	2.07153	SLC26A9	.
Negative Regulation of Interleukin-6 Production (GO:0032715)	2/32	0.0263438	0.28432	8.46667	30.7892	SELENOS;ZC3H12A	.		Steroid hormone biosynthesis	1/61	0.384021	0.722587	2.1	2.00982	AKR1C4	.
Regulation of Interleukin-1 Beta Production (GO:0032651)	3/82	0.0272089	0.28432	4.84189	17.4512	EGR1;ZC3H12A;MALT1	.		Cytosolic DNA-sensing pathway	1/63	0.393745	0.722587	2.03205	1.89398	TREX1	.
Inorganic Anion Transmembrane Transport (GO:0098661)	3/82	0.0272089	0.28432	4.84189	17.4512	SLC20A1;LRRC8A;SLC26A9	.		Inflammatory bowel disease	1/65	0.403316	0.722587	1.96835	1.78733	IFNGR2	.
Cellular Response to Cytokine Stimulus (GO:0071345)	6/289	0.0274833	0.28432	2.72815	9.80544	EGR1;CSF3;CD4;IFNGR2;ZC3H12A;HYAL3	.		Pathways in cancer	5/531	0.409813	0.722587	1.20008	1.07054	PDGFRB;CCNA2;CCND2;IFNGR2;FGFR1	.
Proteasomal Protein Catabolic Process (GO:0010498)	7/372	0.0286061	0.28432	2.47372	8.79193	SELENOS;IFI27;UFD1;DNAJB9;ANKZF1;RNF121;UBE2J1	.		MAPK signaling pathway	3/294	0.410899	0.722587	1.30037	1.15656	PDGFRB;EPHA2;FGFR1	.
Positive Regulation of Metabolic Process (GO:0009893)	4/147	0.0293653	0.28432	3.57806	12.6232	PDGFRB;ZC3H12A;ZBTB7B;JCHAIN	.		Acute myeloid leukemia	1/67	0.412737	0.722587	1.90851	1.68893	CCNA2	.
Membrane Protein Proteolysis (GO:0033619)	2/34	0.029493	0.28432	7.9367	27.9658	HM13;ERAP1	.		Tuberculosis	2/180	0.416956	0.722587	1.41631	1.23895	IFNGR2;MALT1	.
Regulation of Cardiac Muscle Contraction (GO:0055117)	2/34	0.029493	0.28432	7.9367	27.9658	ZC3H12A;ATP2A2	.		Retinol metabolism	1/68	0.417392	0.722587	1.87993	1.64255	RDH11	.
Regulation of Phosphatidylinositol 3-Kinase/Protein Kinase B Signal Transduction (GO:0051896)	5/219	0.0301557	0.28432	2.99737	10.4949	PDGFRB;CSF3;CD19;FGFR1;HBEGF	.		Renin secretion	1/69	0.422011	0.722587	1.85219	1.59793	CLCA2	.
Positive Regulation of Cell Differentiation (GO:0045597)	6/297	0.0308272	0.28432	2.65206	9.22747	CSF3;BTG1;ZC3H12A;LRRC8A;ACVR2B;FGFR1	.		Axon guidance	2/182	0.42241	0.722587	1.40043	1.20686	SEMA3G;EPHA2	.
Negative Regulation of Cytoplasmic Pattern Recognition Receptor Signaling Pathway (GO:0039532)	2/35	0.031121	0.28432	7.6958	26.7035	TREX1;UFD1	.		Prolactin signaling pathway	1/70	0.426592	0.722587	1.82526	1.55498	CCND2	.
Regulation of Vasculature Development (GO:1901342)	2/35	0.031121	0.28432	7.6958	26.7035	TSPAN12;EPHA2	.		Adherens junction	1/71	0.431138	0.722587	1.79909	1.51362	FGFR1	.
Toll-Like Receptor Signaling Pathway (GO:0002224)	2/35	0.031121	0.28432	7.6958	26.7035	TNIP1;TNIP3	.		p53 signaling pathway	1/73	0.440123	0.722587	1.74894	1.43536	CCND2	.
'De Novo' Post-Translational Protein Folding (GO:0051084)	2/36	0.0327839	0.28432	7.46908	25.528	ERO1A;DNAJB14	.		Glioma	1/75	0.448966	0.722587	1.7015	1.36257	PDGFRB	.
Sister Chromatid Segregation (GO:0000819)	2/36	0.0327839	0.28432	7.46908	25.528	NCAPG2;ZNF207	.		Pertussis	1/76	0.453336	0.722587	1.67873	1.32808	CXCL5	.
Positive Regulation of Epithelial Cell Migration (GO:0010634)	2/36	0.0327839	0.28432	7.46908	25.528	INSL3;MAPRE2	.		Arrhythmogenic right ventricular cardiomyopathy	1/77	0.457671	0.722587	1.65655	1.29477	ATP2A2	.
Positive Regulation of Release of Sequestered Calcium Ion Into Cytosol (GO:0051281)	2/36	0.0327839	0.28432	7.46908	25.528	CD19;THY1	.		Leishmaniasis	1/77	0.457671	0.722587	1.65655	1.29477	IFNGR2	.
Cellular Response to Oxygen-Containing Compound (GO:1901701)	7/384	0.0331423	0.28432	2.3935	8.15453	EGR1;SELENOS;TNIP1;TNIP3;ZC3H12A;HMGB2;CXCL5	.		Antigen processing and presentation	1/78	0.461972	0.722587	1.63496	1.2626	CD4	.
Positive Regulation of Myeloid Cell Differentiation (GO:0045639)	2/37	0.0344808	0.28432	7.25531	24.4312	CSF3;HMGB2	.		Pathogenic Escherichia coli infection	2/197	0.462456	0.722587	1.29172	0.996177	CLDN15;SEC24D	.
Regulation of Defense Response to Virus by Host (GO:0050691)	2/38	0.0362113	0.28432	7.05342	23.4059	DTX3L;ZC3H12A	.		Viral carcinogenesis	2/203	0.47802	0.731663	1.25277	0.924678	CCNA2;CCND2	.
COPII-coated Vesicle Budding (GO:0090114)	2/38	0.0362113	0.28432	7.05342	23.4059	SEC24D;SEC23B	.		Diabetic cardiomyopathy	2/203	0.47802	0.731663	1.25277	0.924678	COL1A2;ATP2A2	.
Skeletal System Development (GO:0001501)	4/160	0.0382741	0.28432	3.27772	10.6951	COL1A2;HYAL3;UFD1;FGFR1	.		ErbB signaling pathway	1/85	0.491144	0.736725	1.49818	1.06523	HBEGF	.
Cellular Response to Peptide Hormone Stimulus (GO:0071375)	3/94	0.0384857	0.28432	4.20085	13.6841	NR4A2;SCNN1D;SELENOS	.		Cardiac muscle contraction	1/87	0.499187	0.736725	1.46319	1.01659	ATP2A2	.
Regulation of Focal Adhesion Disassembly (GO:0120182)	1/5	0.0388844	0.28432	31.5892	102.575	MAPRE2	.		Gap junction	1/88	0.50316	0.736725	1.4463	0.993386	PDGFRB	.
Regulation of Hormone Biosynthetic Process (GO:0046885)	1/5	0.0388844	0.28432	31.5892	102.575	EGR1	.		Neuroactive ligand-receptor interaction	3/341	0.507008	0.736725	1.11685	0.7586	CNR2;GZMA;INSL3	.
Negative Regulation of Mast Cell Activation (GO:0033004)	1/5	0.0388844	0.28432	31.5892	102.575	ENPP3	.		Lipid and atherosclerosis	2/215	0.508313	0.736725	1.18147	0.799453	ERO1A;CXCL3	.
Regulation of Inositol Phosphate Biosynthetic Process (GO:0010919)	1/5	0.0388844	0.28432	31.5892	102.575	CD244	.		Hypertrophic cardiomyopathy	1/90	0.511014	0.736725	1.41365	0.949069	ATP2A2	.
Negative Regulation of Myeloid Cell Apoptotic Process (GO:0033033)	1/5	0.0388844	0.28432	31.5892	102.575	SELENOS	.		Regulation of actin cytoskeleton	2/218	0.515708	0.736725	1.16489	0.771405	PDGFRB;FGFR1	.
UDP Metabolic Process (GO:0046048)	1/5	0.0388844	0.28432	31.5892	102.575	ENTPD4	.		Salivary secretion	1/93	0.522564	0.737878	1.36735	0.887421	LYZ	.
Regulation of Macrophage Apoptotic Process (GO:2000109)	1/5	0.0388844	0.28432	31.5892	102.575	SELENOS	.		TGF-beta signaling pathway	1/94	0.526353	0.737878	1.35258	0.868062	ACVR2B	.
Regulation of miRNA Catabolic Process (GO:2000625)	1/5	0.0388844	0.28432	31.5892	102.575	ZC3H12A	.		Dilated cardiomyopathy	1/96	0.533842	0.738019	1.32397	0.830996	ATP2A2	.
Alpha-Beta T Cell Differentiation (GO:0046632)	1/5	0.0388844	0.28432	31.5892	102.575	ZBTB7B	.		Aldosterone synthesis and secretion	1/98	0.541214	0.738019	1.29654	0.795998	NR4A2	.
Ornithine Metabolic Process (GO:0006591)	1/5	0.0388844	0.28432	31.5892	102.575	ARG2	.		Choline metabolism in cancer	1/98	0.541214	0.738019	1.29654	0.795998	PDGFRB	.
Small Molecule Catabolic Process (GO:0044282)	1/5	0.0388844	0.28432	31.5892	102.575	ENTPD4	.		Progesterone-mediated oocyte maturation	1/100	0.54847	0.740317	1.27022	0.762923	CCNA2	.
Sphingomyelin Biosynthetic Process (GO:0006686)	1/5	0.0388844	0.28432	31.5892	102.575	OSBP	.		Chagas disease	1/102	0.555611	0.740317	1.24494	0.731633	IFNGR2	.
Positive Regulation of Focal Adhesion Disassembly (GO:0120183)	1/5	0.0388844	0.28432	31.5892	102.575	MAPRE2	.		Protein digestion and absorption	1/103	0.55914	0.740317	1.23267	0.71662	COL1A2	.
Extracellular Exosome Biogenesis (GO:0097734)	1/5	0.0388844	0.28432	31.5892	102.575	RAB27A	.		C-type lectin receptor signaling pathway	1/104	0.562641	0.740317	1.22064	0.702008	MALT1	.
+ Reg of Nucleotide-Binding Domain, Leucine Rich Repeat Containing Receptor Sgnlng Pway (GO:0070426)	1/5	0.0388844	0.28432	31.5892	102.575	SLC46A2	.		HIF-1 signaling pathway	1/109	0.579735	0.751443	1.16384	0.634505	IFNGR2	.
Protein Geranylgeranylation (GO:0018344)	1/5	0.0388844	0.28432	31.5892	102.575	RABGGTB	.		Shigellosis	2/246	0.581116	0.751443	1.02974	0.558948	TNIP1;MALT1	.
Pyrimidine Nucleotide Metabolic Process (GO:0006220)	1/5	0.0388844	0.28432	31.5892	102.575	ENPP3	.		Toxoplasmosis	1/112	0.589671	0.755988	1.13221	0.598022	IFNGR2	.
Pyrimidine Ribonucleotide Metabolic Process (GO:0009218)	1/5	0.0388844	0.28432	31.5892	102.575	ENTPD4	.		AMPK signaling pathway	1/120	0.61504	0.779117	1.05567	0.513125	CCNA2	.
Regulation of Fc Receptor Mediated Stimulatory Signaling Pathway (GO:0060368)	1/5	0.0388844	0.28432	31.5892	102.575	CSK	.		Thyroid hormone signaling pathway	1/121	0.6181	0.779117	1.04682	0.503628	ATP2A2	.
Negative Regulation of Golgi to Plasma Membrane Protein Transport (GO:0042997)	1/5	0.0388844	0.28432	31.5892	102.575	CSK	.		Platelet activation	1/124	0.627134	0.783918	1.02113	0.476453	COL1A2	.
Negative Regulation of IRE1-mediated Unfolded Protein Response (GO:1903895)	1/5	0.0388844	0.28432	31.5892	102.575	DNAJB9	.		Osteoclast differentiation	1/127	0.635956	0.787323	0.996664	0.451116	IFNGR2	.
Negative Regulation of T-helper 17 Type Immune Response (GO:2000317)	1/5	0.0388844	0.28432	31.5892	102.575	ZC3H12A	.		FoxO signaling pathway	1/131	0.647397	0.787323	0.965801	0.419926	CCND2	.
Negative Regulation of Acute Inflammatory Response (GO:0002674)	1/5	0.0388844	0.28432	31.5892	102.575	SELENOS	.		Apelin signaling pathway	1/137	0.663892	0.787323	0.922911	0.378058	EGR1	.
Regulation of T Cell Receptor Signaling Pathway (GO:0050856)	2/40	0.0397703	0.28432	6.68151	21.5454	TRAT1;THY1	.		Yersinia infection	1/137	0.663892	0.787323	0.922911	0.378058	CD4	.
Regulation of Actin Filament-Based Process (GO:0032970)	3/96	0.0405634	0.28432	4.11009	13.1724	PDGFRB;PEAK3;RHOF	.		Estrogen signaling pathway	1/137	0.663892	0.787323	0.922911	0.378058	HBEGF	.
Positive Regulation of Myoblast Differentiation (GO:0045663)	2/41	0.0415976	0.28432	6.50986	20.6995	BTG1;LRRC8A	.		Fluid shear stress and atherosclerosis	1/139	0.669217	0.787323	0.909443	0.365274	ACVR2B	.
Type I Interferon-Mediated Signaling Pathway (GO:0060337)	2/42	0.043456	0.28432	6.34679	19.9036	IFI27;OASL	.		Measles	1/139	0.669217	0.787323	0.909443	0.365274	CCND2	.
Positive Regulation of Cytokine Production (GO:0001819)	6/325	0.0445848	0.28432	2.41581	7.51406	EGR1;CD4;TRAF3IP3;ZBTB7B;MALT1;CD244	.		Ubiquitin mediated proteolysis	1/140	0.671849	0.787323	0.902855	0.359085	UBE2J1	.
Cellular Response to Chemical Stress (GO:0062197)	3/100	0.0448856	0.28432	3.93981	12.2277	SELENOS;HM13;ZC3H12A	.		Spinocerebellar ataxia	1/143	0.679619	0.790255	0.883646	0.341284	ATP2A2	.
Monoatomic Ion Transport (GO:0006811)	3/100	0.0448856	0.28432	3.93981	12.2277	SLC20A1;LRRC8A;SLC26A9	.		Breast cancer	1/147	0.689696	0.792098	0.859262	0.31922	FGFR1	.
Neutrophil Chemotaxis (GO:0030593)	2/43	0.0453447	0.28432	6.19168	19.1537	CXCL3;CXCL5	.		Phospholipase D signaling pathway	1/148	0.692165	0.792098	0.853373	0.313982	PDGFRB	.
Cellular Response to Glucose Starvation (GO:0042149)	2/43	0.0453447	0.28432	6.19168	19.1537	TBL2;ZC3H12A	.		Adrenergic signaling in cardiomyocytes	1/150	0.697046	0.792098	0.841833	0.303821	ATP2A2	.
Cellular Response to Type I Interferon (GO:0071357)	2/43	0.0453447	0.28432	6.19168	19.1537	IFI27;OASL	.		MicroRNAs in cancer	2/310	0.705675	0.795874	0.813104	0.283448	PDGFRB;CCND2	.
Positive Regulation of Myeloid Leukocyte Differentiation (GO:0002763)	2/43	0.0453447	0.28432	6.19168	19.1537	TM4SF19;CD4	.		Hepatitis C	1/157	0.71353	0.798728	0.803773	0.271297	CLDN15	.
Negative Regulation of Establishment of Protein Localization to Mitochondrion (GO:1903748)	1/6	0.0464791	0.28432	25.2701	77.5476	LMAN1	.		Hepatitis B	1/162	0.724756	0.801782	0.778613	0.250651	CCNA2	.
Regulation of Endodeoxyribonuclease Activity (GO:0032071)	1/6	0.0464791	0.28432	25.2701	77.5476	GZMA	.		Hippo signaling pathway	1/163	0.726949	0.801782	0.773767	0.246754	CCND2	.
Negative Regulation of Glycogen Biosynthetic Process (GO:0045719)	1/6	0.0464791	0.28432	25.2701	77.5476	SELENOS	.		cGMP-PKG signaling pathway	1/167	0.735545	0.804067	0.754969	0.231884	ATP2A2	.
Antigen Processing and Presentation of Endogenous Peptide Antigen via MHC Class I (GO:0019885)	1/6	0.0464791	0.28432	25.2701	77.5476	ERAP1	.		Tight junction	1/169	0.739742	0.804067	0.745905	0.224856	CLDN15	.
Autophagosome Membrane Docking (GO:0016240)	1/6	0.0464791	0.28432	25.2701	77.5476	ATP2A2	.		Influenza A	1/172	0.745914	0.804943	0.732708	0.21479	IFNGR2	.
Paracellular Transport (GO:0160184)	1/6	0.0464791	0.28432	25.2701	77.5476	CLDN15	.		NOD-like receptor signaling pathway	1/181	0.763569	0.81811	0.695754	0.187681	CXCL3	.
Regulation of Translational Initiation in Response to Stress (GO:0043558)	1/6	0.0464791	0.28432	25.2701	77.5476	PPP1R15A	.		Kaposi sarcoma-associated herpesvirus infection	1/193	0.785227	0.835348	0.651871	0.157611	CXCL3	.
Smooth Muscle Cell Migration (GO:0014909)	1/6	0.0464791	0.28432	25.2701	77.5476	PDGFRB	.		Human immunodeficiency virus 1 infection	1/212	0.815557	0.861503	0.592598	0.120822	CD4	.
Positive Regulation of Fibroblast Apoptotic Process (GO:2000271)	1/6	0.0464791	0.28432	25.2701	77.5476	BTG1	.		cAMP signaling pathway	1/216	0.821378	0.861585	0.581455	0.114414	ATP2A2	.
Positive Regulation of Leukocyte Tethering or Rolling (GO:1903238)	1/6	0.0464791	0.28432	25.2701	77.5476	CHST4	.		Thermogenesis	1/232	0.842892	0.878013	0.54074	0.0924212	FGFR1	.
Glucan Catabolic Process (GO:0009251)	1/6	0.0464791	0.28432	25.2701	77.5476	MGAM	.		Salmonella infection	1/249	0.862935	0.886577	0.503236	0.0741852	MLKL	.
Positive Regulation of Respiratory Burst (GO:0060267)	1/6	0.0464791	0.28432	25.2701	77.5476	JCHAIN	.		Parkinson disease	1/249	0.862935	0.886577	0.503236	0.0741852	UBE2J1	.
Interleukin-27-Mediated Signaling Pathway (GO:0070106)	1/6	0.0464791	0.28432	25.2701	77.5476	OASL	.		Prion disease	1/273	0.886978	0.904403	0.458271	0.0549629	EGR1	.
Lysosomal Protein Catabolic Process (GO:1905146)	1/6	0.0464791	0.28432	25.2701	77.5476	CST7	.		Pathways of neurodegeneration	2/475	0.892345	0.904403	0.524991	0.0597979	ATP2A2;UBE2J1	.
Mitochondrion-Endoplasmic Reticulum Membrane Tethering (GO:1990456)	1/6	0.0464791	0.28432	25.2701	77.5476	ATP2A2	.		Alzheimer disease	1/369	0.94787	0.954231	0.33706	0.0180455	ATP2A2	.
Regulation of NK T Cell Proliferation (GO:0051140)	1/6	0.0464791	0.28432	25.2701	77.5476	ZBTB7B	.		Herpes simplex virus 1 infection	1/498	0.981681	0.981681	0.247921	0.00458378	IFNGR2	.
Regulation of Rab Protein Signal Transduction (GO:0032483)	1/6	0.0464791	0.28432	25.2701	77.5476	DENND3	.
Negative Regulation of RIG-I Signaling Pathway (GO:0039536)	1/6	0.0464791	0.28432	25.2701	77.5476	UFD1	.
Carbohydrate Derivative Biosynthetic Process (GO:1901137)	2/44	0.0472634	0.28432	6.04396	18.4463	DPAGT1;TNIP1	.
Positive Regulation of Wound Healing (GO:0090303)	2/44	0.0472634	0.28432	6.04396	18.4463	INSL3;HBEGF	.
Peptidyl-Tyrosine Modification (GO:0018212)	2/46	0.0511879	0.28432	5.76865	17.1459	PDGFRB;FGFR1	.
Positive Regulation of Chemotaxis (GO:0050921)	2/46	0.0511879	0.28432	5.76865	17.1459	PDGFRB;FGFR1	.
Regulation of Calcium-Mediated Signaling (GO:0050848)	2/46	0.0511879	0.28432	5.76865	17.1459	PDGFRB;TRAT1	.
Cytokine-Mediated Signaling Pathway (GO:0019221)	5/255	0.0520881	0.28432	2.56105	7.56742	EGR1;CSF3;CD4;IFNGR2;OASL	.
Protein Catabolic Process (GO:0030163)	3/107	0.0529753	0.28432	3.67333	10.792	GZMA;DENND3;MALT1	.
Mitotic Nuclear Division (GO:0140014)	2/47	0.0531926	0.28432	5.64017	16.5473	NCAPG2;ZNF207	.
Mitotic Spindle Assembly (GO:0090307)	2/47	0.0531926	0.28432	5.64017	16.5473	INCENP;ZNF207	.
Monoatomic Anion Transport (GO:0006820)	2/47	0.0531926	0.28432	5.64017	16.5473	LRRC8A;SLC26A9	.
DNA Geometric Change (GO:0032392)	1/7	0.0540142	0.28432	21.0573	61.456	HMGB2	.
ER Overload Response (GO:0006983)	1/7	0.0540142	0.28432	21.0573	61.456	SELENOS	.
Negative Regulation of Neuron Projection Regeneration (GO:0070571)	1/7	0.0540142	0.28432	21.0573	61.456	THY1	.
Regulation of Mitotic Cytokinesis (GO:1902412)	1/7	0.0540142	0.28432	21.0573	61.456	INCENP	.
Cell Migration Involved in Heart Development (GO:0060973)	1/7	0.0540142	0.28432	21.0573	61.456	PDGFRB	.
Photoreceptor Cell Differentiation (GO:0046530)	1/7	0.0540142	0.28432	21.0573	61.456	MAPRE2	.
Positive Regulation of CD4-positive, Alpha-Beta T Cell Differentiation (GO:0043372)	1/7	0.0540142	0.28432	21.0573	61.456	ZBTB7B	.
Positive Regulation of Attachment of Mitotic Spindle Microtubules to Kinetochore (GO:1902425)	1/7	0.0540142	0.28432	21.0573	61.456	INCENP	.
Retinal Rod Cell Development (GO:0046548)	1/7	0.0540142	0.28432	21.0573	61.456	MAPRE2	.
Positive Regulation of Bicellular Tight Junction Assembly (GO:1903348)	1/7	0.0540142	0.28432	21.0573	61.456	EPHA2	.
cyclic-GMP-AMP Transmembrane Import Across Plasma Membrane (GO:0140361)	1/7	0.0540142	0.28432	21.0573	61.456	SLC46A2	.
Deadenylation-Dependent Decapping of Nuclear-Transcribed mRNA (GO:0000290)	1/7	0.0540142	0.28432	21.0573	61.456	DCP1A	.
Positive Regulation of Chromatin Binding (GO:0035563)	1/7	0.0540142	0.28432	21.0573	61.456	DTX3L	.
Positive Regulation of Chromosome Condensation (GO:1905821)	1/7	0.0540142	0.28432	21.0573	61.456	NCAPG2	.
Positive Regulation of Inositol Phosphate Biosynthetic Process (GO:0060732)	1/7	0.0540142	0.28432	21.0573	61.456	CD244	.
Positive Regulation of Microtubule Nucleation (GO:0090063)	1/7	0.0540142	0.28432	21.0573	61.456	PDE4DIP	.
Positive Regulation of Receptor Catabolic Process (GO:2000646)	1/7	0.0540142	0.28432	21.0573	61.456	DTX3L	.
Hyaluronan Catabolic Process (GO:0030214)	1/7	0.0540142	0.28432	21.0573	61.456	HYAL3	.
Lens Fiber Cell Development (GO:0070307)	1/7	0.0540142	0.28432	21.0573	61.456	EPHA2	.
Locomotor Rhythm (GO:0045475)	1/7	0.0540142	0.28432	21.0573	61.456	EGR1	.
Regulation of CD8-positive, Alpha-Beta T Cell Differentiation (GO:0043376)	1/7	0.0540142	0.28432	21.0573	61.456	ZBTB7B	.
Negative Regulation of CD8-positive, Alpha-Beta T Cell Activation (GO:2001186)	1/7	0.0540142	0.28432	21.0573	61.456	ZBTB7B	.
Negative Regulation of D-glucose Import (GO:0046325)	1/7	0.0540142	0.28432	21.0573	61.456	SELENOS	.
Regulation of Carbohydrate Biosynthetic Process (GO:0043255)	1/7	0.0540142	0.28432	21.0573	61.456	SELENOS	.
Reg of Cardiac Muscle Cell Action Potential Inv in Reg of Contraction (GO:0098909)	1/7	0.0540142	0.28432	21.0573	61.456	ATP2A2	.
Regulation of Cellular Extravasation (GO:0002691)	1/7	0.0540142	0.28432	21.0573	61.456	THY1	.
Regulation of Chromosome Condensation (GO:0060623)	1/7	0.0540142	0.28432	21.0573	61.456	NCAPG2	.
Negative Regulation of Viral Genome Replication (GO:0045071)	2/48	0.0552249	0.28432	5.51728	15.9799	TNIP1;OASL	.
Endoplasmic Reticulum Unfolded Protein Response (GO:0030968)	2/48	0.0552249	0.28432	5.51728	15.9799	TBL2;SELENOS	.
Primary Alcohol Metabolic Process (GO:0034308)	2/48	0.0552249	0.28432	5.51728	15.9799	RDH11;AKR1C4	.
Natural Killer Cell Activation (GO:0030101)	2/48	0.0552249	0.28432	5.51728	15.9799	CD48;CD244	.
Positive Regulation of Cell Migration (GO:0030335)	6/344	0.05581	0.28432	2.2778	6.57326	PDGFRB;ZC3H12A;SEMA3G;INSL3;EPHA2;HBEGF	.
Inflammatory Response (GO:0006954)	5/261	0.0564574	0.28432	2.50026	7.18641	IFI27;GZMA;HYAL3;LYZ;CXCL5	.
Regulation of Wound Healing (GO:0061041)	2/49	0.0572842	0.28432	5.39962	15.4415	INSL3;HBEGF	.
Negative Regulation of Developmental Process (GO:0051093)	3/111	0.0578917	0.28432	3.53656	10.0763	ZNF296;HYAL3;THY1	.
Positive Regulation of GTPase Activity (GO:0043547)	3/111	0.0578917	0.28432	3.53656	10.0763	THY1;MAPRE2;EPHA2	.
Endoplasmic Reticulum to Golgi Vesicle-Mediated Transport (GO:0006888)	3/112	0.0591535	0.28432	3.50394	9.9078	LMAN1;RABGGTB;SEC24D	.
Regulation of Interleukin-2 Production (GO:0032663)	2/50	0.05937	0.28432	5.28686	14.9299	CD4;MALT1	.
Neutrophil Migration (GO:1990266)	2/50	0.05937	0.28432	5.28686	14.9299	CXCL3;CXCL5	.
Positive Regulation of Blood Vessel Endothelial Cell Migration (GO:0043536)	2/50	0.05937	0.28432	5.28686	14.9299	FGFBP1;FGFR1	.
Positive Regulation of Fat Cell Differentiation (GO:0045600)	2/50	0.05937	0.28432	5.28686	14.9299	ZC3H12A;ZBTB7B	.
Lipid Transport (GO:0006869)	3/113	0.0604282	0.28432	3.47191	9.74321	NPC1;OSBP;AKR1C4	.
Epithelial to Mesenchymal Transition (GO:0001837)	2/51	0.0614817	0.28432	5.1787	14.4435	S100A4;FGFR1	.
Inorganic Anion Transport (GO:0015698)	2/51	0.0614817	0.28432	5.1787	14.4435	ENPP3;SLC26A9	.
Regulation of Endothelial Cell Differentiation (GO:0045601)	1/8	0.0614901	0.28432	18.0482	50.3343	BTG1	.
Negative Regulation of Glycogen Metabolic Process (GO:0070874)	1/8	0.0614901	0.28432	18.0482	50.3343	SELENOS	.
Regulation of Epidermis Development (GO:0045682)	1/8	0.0614901	0.28432	18.0482	50.3343	MAFF	.
Regulation of Fibroblast Apoptotic Process (GO:2000269)	1/8	0.0614901	0.28432	18.0482	50.3343	BTG1	.
Negative Regulation of Leukocyte Proliferation (GO:0070664)	1/8	0.0614901	0.28432	18.0482	50.3343	ENPP3	.
Negative Regulation of Nitric Oxide Biosynthetic Process (GO:0045019)	1/8	0.0614901	0.28432	18.0482	50.3343	ZC3H12A	.
Negative Regulation of Nitric Oxide Metabolic Process (GO:1904406)	1/8	0.0614901	0.28432	18.0482	50.3343	ZC3H12A	.
Negative Regulation of Retrograde Protein Transport, ER to Cytosol (GO:1904153)	1/8	0.0614901	0.28432	18.0482	50.3343	UBE2J1	.
Aminoglycoside Antibiotic Metabolic Process (GO:0030647)	1/8	0.0614901	0.28432	18.0482	50.3343	AKR1C4	.
Regulation of Phospholipase Activity (GO:0010517)	1/8	0.0614901	0.28432	18.0482	50.3343	FGFR1	.
Nucleoside Triphosphate Metabolic Process (GO:0009141)	1/8	0.0614901	0.28432	18.0482	50.3343	ENPP3	.
+ Reg of Blood Vessel Endothelial Cell Proliferation Inv in Sprouting Angiogenesis (GO:1903589)	1/8	0.0614901	0.28432	18.0482	50.3343	FGFBP1	.
Daunorubicin Metabolic Process (GO:0044597)	1/8	0.0614901	0.28432	18.0482	50.3343	AKR1C4	.
Sensory Perception of Sour Taste (GO:0050915)	1/8	0.0614901	0.28432	18.0482	50.3343	SCNN1D	.
Detection of Visible Light (GO:0009584)	1/8	0.0614901	0.28432	18.0482	50.3343	MAPRE2	.
Skin Morphogenesis (GO:0043589)	1/8	0.0614901	0.28432	18.0482	50.3343	COL1A2	.
Establishment of Vesicle Localization (GO:0051650)	1/8	0.0614901	0.28432	18.0482	50.3343	RAB27A	.
Positive Regulation of Megakaryocyte Differentiation (GO:0045654)	1/8	0.0614901	0.28432	18.0482	50.3343	HMGB2	.
Guanine Nucleotide Transmembrane Transport (GO:1903790)	1/8	0.0614901	0.28432	18.0482	50.3343	SLC46A2	.
Lactation (GO:0007595)	1/8	0.0614901	0.28432	18.0482	50.3343	ZBTB7B	.
Protein Catabolic Process in the Vacuole (GO:0007039)	1/8	0.0614901	0.28432	18.0482	50.3343	CST7	.
Protein Hexamerization (GO:0034214)	1/8	0.0614901	0.28432	18.0482	50.3343	LRRC8A	.
Magnesium Ion Homeostasis (GO:0010960)	1/8	0.0614901	0.28432	18.0482	50.3343	CNNM4	.
Protein Localization to Perinuclear Region of Cytoplasm (GO:1905719)	1/8	0.0614901	0.28432	18.0482	50.3343	FHIP1B	.
Necroptotic Process (GO:0070266)	1/8	0.0614901	0.28432	18.0482	50.3343	MLKL	.
Negative Regulation of Alpha-Beta T Cell Differentiation (GO:0046639)	1/8	0.0614901	0.28432	18.0482	50.3343	ZBTB7B	.
Negative Regulation of Alpha-Beta T Cell Proliferation (GO:0046642)	1/8	0.0614901	0.28432	18.0482	50.3343	ZBTB7B	.
Cholesterol Transport (GO:0030301)	2/52	0.0636188	0.28432	5.07487	13.9805	NPC1;OSBP	.
Endosome Organization (GO:0007032)	2/52	0.0636188	0.28432	5.07487	13.9805	FHIP1B;RAB27A	.
Antimicrobial Humoral Immune Response Mediated by Antimicrobial Peptide (GO:0061844)	3/116	0.0643291	0.28432	3.37922	9.2717	TOR2A;CXCL3;CXCL5	.
Regulation of Release of Sequestered Calcium Ion Into Cytosol (GO:0051279)	2/53	0.0657807	0.28432	4.97511	13.5394	CD19;THY1	.
Positive Regulation of miRNA Metabolic Process (GO:2000630)	2/53	0.0657807	0.28432	4.97511	13.5394	EGR1;ZC3H12A	.
Microtubule Bundle Formation (GO:0001578)	2/53	0.0657807	0.28432	4.97511	13.5394	ZNF207;MAPRE2	.
Protein Modification Process (GO:0036211)	8/545	0.0679255	0.28432	1.91732	5.15633	ERO1A;DUSP11;CCNA2;NPC1;CSK;RABGGTB;CHST4;FGFR1	.
Negative Regulation of Neuron Projection Development (GO:0010977)	2/54	0.067967	0.28432	4.87919	13.1188	ZNF296;THY1	.
Positive Regulation of Cell Cycle Process (GO:0090068)	3/119	0.0683437	0.28432	3.29132	8.8313	PDGFRB;INCENP;NCAPG2	.
B Cell Homeostasis (GO:0001782)	1/9	0.0689072	0.28432	15.7914	42.2419	GAPT	.
Negative Regulation of Epidermal Growth Factor-Activated Receptor Activity (GO:0007175)	1/9	0.0689072	0.28432	15.7914	42.2419	GPRC5A	.
DNA Topological Change (GO:0006265)	1/9	0.0689072	0.28432	15.7914	42.2419	HMGB2	.
Regulation of Ketone Biosynthetic Process (GO:0010566)	1/9	0.0689072	0.28432	15.7914	42.2419	EGR1	.
Negative Regulation of Oxidoreductase Activity (GO:0051354)	1/9	0.0689072	0.28432	15.7914	42.2419	GZMA	.
Negative Regulation of Protein Exit From Endoplasmic Reticulum (GO:0070862)	1/9	0.0689072	0.28432	15.7914	42.2419	UBE2J1	.
Negative Regulation of Receptor Binding (GO:1900121)	1/9	0.0689072	0.28432	15.7914	42.2419	ATP2A2	.
Regulation of Nitric Oxide Metabolic Process (GO:0080164)	1/9	0.0689072	0.28432	15.7914	42.2419	SELENOS	.
Astral Microtubule Organization (GO:0030953)	1/9	0.0689072	0.28432	15.7914	42.2419	PDE4DIP	.
Regulation of Receptor Binding (GO:1900120)	1/9	0.0689072	0.28432	15.7914	42.2419	ATP2A2	.
Regulation of Respiratory Burst (GO:0060263)	1/9	0.0689072	0.28432	15.7914	42.2419	JCHAIN	.
Regulation of Translation in Response to Endoplasmic Reticulum Stress (GO:0036490)	1/9	0.0689072	0.28432	15.7914	42.2419	PPP1R15A	.
Regulation of Translation in Response to Stress (GO:0043555)	1/9	0.0689072	0.28432	15.7914	42.2419	PPP1R15A	.
Phototransduction, Visible Light (GO:0007603)	1/9	0.0689072	0.28432	15.7914	42.2419	MAPRE2	.
Polyketide Metabolic Process (GO:0030638)	1/9	0.0689072	0.28432	15.7914	42.2419	AKR1C4	.
Retinal Rod Cell Differentiation (GO:0060221)	1/9	0.0689072	0.28432	15.7914	42.2419	MAPRE2	.
Doxorubicin Metabolic Process (GO:0044598)	1/9	0.0689072	0.28432	15.7914	42.2419	AKR1C4	.
Ectoderm Development (GO:0007398)	1/9	0.0689072	0.28432	15.7914	42.2419	ZBTB7B	.
Positive Regulation of Keratinocyte Migration (GO:0051549)	1/9	0.0689072	0.28432	15.7914	42.2419	MAPRE2	.
Positive Regulation of Lipase Activity (GO:0060193)	1/9	0.0689072	0.28432	15.7914	42.2419	FGFR1	.
Positive Regulation of Monocyte Differentiation (GO:0045657)	1/9	0.0689072	0.28432	15.7914	42.2419	CD4	.
Positive Regulation of Phospholipase Activity (GO:0010518)	1/9	0.0689072	0.28432	15.7914	42.2419	FGFR1	.
Intestinal Cholesterol Absorption (GO:0030299)	1/9	0.0689072	0.28432	15.7914	42.2419	NPC1	.
Progesterone Metabolic Process (GO:0042448)	1/9	0.0689072	0.28432	15.7914	42.2419	AKR1C4	.
Protein Localization to Microtubule (GO:0035372)	1/9	0.0689072	0.28432	15.7914	42.2419	MAPRE2	.
Protein Localization to Microtubule Cytoskeleton (GO:0072698)	1/9	0.0689072	0.28432	15.7914	42.2419	MAPRE2	.
Protein Prenylation (GO:0018342)	1/9	0.0689072	0.28432	15.7914	42.2419	RABGGTB	.
Regulation of Attachment of Mitotic Spindle Microtubules to Kinetochore (GO:1902423)	1/9	0.0689072	0.28432	15.7914	42.2419	INCENP	.
Negative Regulation of PERK-mediated Unfolded Protein Response (GO:1903898)	1/9	0.0689072	0.28432	15.7914	42.2419	PPP1R15A	.
Negative Regulation of T-helper Cell Differentiation (GO:0045623)	1/9	0.0689072	0.28432	15.7914	42.2419	ZC3H12A	.
Mitotic Sister Chromatid Segregation (GO:0000070)	3/120	0.0697067	0.28432	3.26303	8.69094	INCENP;NCAPG2;ZNF207	.
Negative Regulation of Defense Response (GO:0031348)	3/121	0.071082	0.28432	3.23521	8.55364	SELENOS;TREX1;ENPP3	.
Cellular Response to Oxidative Stress (GO:0034599)	3/121	0.071082	0.28432	3.23521	8.55364	SELENOS;HM13;ZC3H12A	.
Defense Response to Virus (GO:0051607)	4/198	0.0722394	0.28432	2.63061	6.91263	IFI27;MLKL;IRF2;OASL	.
Positive Regulation of Interleukin-1 Beta Production (GO:0032731)	2/56	0.0724106	0.28432	4.69801	12.3342	EGR1;MALT1	.
Protein Localization to Membrane (GO:0072657)	4/199	0.0732897	0.28432	2.61698	6.83906	NPC1;TMEM88;THY1;EPHA2	.
Protein-Containing Complex Organization (GO:0043933)	3/123	0.0738692	0.28432	3.18097	8.28788	PDE4DIP;DNAJB14;JCHAIN	.
Regulation of Blood Vessel Endothelial Cell Migration (GO:0043535)	2/57	0.0746668	0.28432	4.61235	11.9678	EPHA2;FGFR1	.
Negative Regulation of Macromolecule Metabolic Process (GO:0010605)	1/10	0.0762662	0.28432	14.0361	36.1222	TRAT1	.
UDP-N-acetylglucosamine Metabolic Process (GO:0006047)	1/10	0.0762662	0.28432	14.0361	36.1222	B4GALNT2	.
Cellular Response to Type III Interferon (GO:0071358)	1/10	0.0762662	0.28432	14.0361	36.1222	IFNGR2	.
Positive Regulation of RIG-I Signaling Pathway (GO:1900246)	1/10	0.0762662	0.28432	14.0361	36.1222	OASL	.
Positive Regulation of Attachment of Spindle Microtubules to Kinetochore (GO:0051987)	1/10	0.0762662	0.28432	14.0361	36.1222	INCENP	.
Sarcoplasmic Reticulum Calcium Ion Transport (GO:0070296)	1/10	0.0762662	0.28432	14.0361	36.1222	ATP2A2	.
Self Proteolysis (GO:0097264)	1/10	0.0762662	0.28432	14.0361	36.1222	DHH	.
Positive Regulation of Cellular Senescence (GO:2000774)	1/10	0.0762662	0.28432	14.0361	36.1222	ARG2	.
Positive Regulation of Lipid Localization (GO:1905954)	1/10	0.0762662	0.28432	14.0361	36.1222	ZC3H12A	.
Type II Interferon-Mediated Signaling Pathway (GO:0060333)	1/10	0.0762662	0.28432	14.0361	36.1222	IFNGR2	.
Type III Interferon-Mediated Signaling Pathway (GO:0038196)	1/10	0.0762662	0.28432	14.0361	36.1222	IFNGR2	.
Positive Regulation of Mitotic Cell Cycle Spindle Assembly Checkpoint (GO:0090267)	1/10	0.0762662	0.28432	14.0361	36.1222	INCENP	.
Glomerular Filtration (GO:0003094)	1/10	0.0762662	0.28432	14.0361	36.1222	JCHAIN	.
Positive Regulation of Nitric-Oxide Synthase Activity (GO:0051000)	1/10	0.0762662	0.28432	14.0361	36.1222	S100A1	.
miRNA Catabolic Process (GO:0010587)	1/10	0.0762662	0.28432	14.0361	36.1222	ZC3H12A	.
Mitotic Spindle Elongation (GO:0000022)	1/10	0.0762662	0.28432	14.0361	36.1222	INCENP	.
Mitotic Spindle Midzone Assembly (GO:0051256)	1/10	0.0762662	0.28432	14.0361	36.1222	INCENP	.
Regulation of Golgi to Plasma Membrane Protein Transport (GO:0042996)	1/10	0.0762662	0.28432	14.0361	36.1222	CSK	.
Negative Regulation by Host of Viral Genome Replication (GO:0044828)	1/10	0.0762662	0.28432	14.0361	36.1222	ZC3H12A	.
Negative Regulation of T-helper 17 Cell Differentiation (GO:2000320)	1/10	0.0762662	0.28432	14.0361	36.1222	ZC3H12A	.
Regulation of Myoblast Differentiation (GO:0045661)	2/58	0.0769454	0.28432	4.52976	11.6173	BTG1;LRRC8A	.
Peptidyl-Tyrosine Phosphorylation (GO:0018108)	2/58	0.0769454	0.28432	4.52976	11.6173	PDGFRB;FGFR1	.
Cellular Response to Unfolded Protein (GO:0034620)	2/58	0.0769454	0.28432	4.52976	11.6173	TBL2;SELENOS	.
Mesenchymal Cell Differentiation (GO:0048762)	2/58	0.0769454	0.28432	4.52976	11.6173	S100A4;FGFR1	.
Purine Ribonucleotide Metabolic Process (GO:0009150)	2/58	0.0769454	0.28432	4.52976	11.6173	ENPP3;EPHA2	.
Positive Regulation of Angiogenesis (GO:0045766)	3/126	0.0781401	0.286867	3.10291	7.9101	BTG1;S100A1;ZC3H12A	.
Positive Regulation of Canonical NF-kappaB Signal Transduction (GO:0043123)	4/204	0.0786572	0.286867	2.55091	6.48608	CD4;SLC20A1;S100A4;MALT1	.
Response to Interleukin-1 (GO:0070555)	2/59	0.0792458	0.286867	4.45007	11.2818	HYAL3;ZC3H12A	.
RNA Biosynthetic Process (GO:0032774)	3/128	0.0810465	0.286867	3.05295	7.67126	NR4A2;DUSP11;RBM3	.
Neuron Migration (GO:0001764)	2/60	0.0815676	0.286867	4.37312	10.9605	NR4A2;FGFR1	.
Regulation of Chromosome Separation (GO:1905818)	1/11	0.0835673	0.286867	12.6318	31.3535	NCAPG2	.
Regulation of Epidermal Growth Factor-Activated Receptor Activity (GO:0007176)	1/11	0.0835673	0.286867	12.6318	31.3535	GPRC5A	.
Negative Regulation of Heart Contraction (GO:0045822)	1/11	0.0835673	0.286867	12.6318	31.3535	ZC3H12A	.
Negative Regulation of Leukocyte Apoptotic Process (GO:2000107)	1/11	0.0835673	0.286867	12.6318	31.3535	SELENOS	.
MyD88-independent Toll-Like Receptor Signaling Pathway (GO:0002756)	1/11	0.0835673	0.286867	12.6318	31.3535	TNIP3	.
Regulation of Keratinocyte Migration (GO:0051547)	1/11	0.0835673	0.286867	12.6318	31.3535	MAPRE2	.
Regulation of Leukocyte Tethering or Rolling (GO:1903236)	1/11	0.0835673	0.286867	12.6318	31.3535	CHST4	.
Negative Regulation of Ubiquitin-Protein Transferase Activity (GO:0051444)	1/11	0.0835673	0.286867	12.6318	31.3535	DTX3L	.
Cellular Response to UV-B (GO:0071493)	1/11	0.0835673	0.286867	12.6318	31.3535	HYAL3	.
Positive Regulation of Calcium Ion-Dependent Exocytosis (GO:0045956)	1/11	0.0835673	0.286867	12.6318	31.3535	HYAL3	.
Positive Regulation of Execution Phase of Apoptosis (GO:1900119)	1/11	0.0835673	0.286867	12.6318	31.3535	ZC3H12A	.
Positive Regulation of Gene Expression via Chromosomal CpG Island Demethylation (GO:0044029)	1/11	0.0835673	0.286867	12.6318	31.3535	EGR1	.
Positive Regulation of mRNA Metabolic Process (GO:1903313)	1/11	0.0835673	0.286867	12.6318	31.3535	ZC3H12A	.
Positive Regulation of Mitotic Cytokinesis (GO:1903490)	1/11	0.0835673	0.286867	12.6318	31.3535	INCENP	.
Positive Regulation of Spindle Checkpoint (GO:0090232)	1/11	0.0835673	0.286867	12.6318	31.3535	INCENP	.
Intestinal Lipid Absorption (GO:0098856)	1/11	0.0835673	0.286867	12.6318	31.3535	NPC1	.
mRNA Methylguanosine-Cap Decapping (GO:0110156)	1/11	0.0835673	0.286867	12.6318	31.3535	DCP1A	.
Negative Regulation of D-glucose Transmembrane Transport (GO:0010829)	1/11	0.0835673	0.286867	12.6318	31.3535	SELENOS	.
Regulation of Reactive Oxygen Species Metabolic Process (GO:2000377)	2/61	0.0839103	0.286867	4.29878	10.6524	PDGFRB;ZC3H12A	.
Regulation of Cell Population Proliferation (GO:0042127)	10/769	0.0842683	0.286867	1.6988	4.20241	PDGFRB;KLF10;CSF3;FGFBP1;CCND2;BTG1;HMGB2;CXCL5;FGFR1;HBEGF	.
Intracellular Monoatomic Cation Homeostasis (GO:0030003)	4/210	0.0853506	0.286867	2.47585	6.09305	SCNN1D;ATP2A2;ACVR2B;CNNM4	.
Regulation of Tumor Necrosis Factor Production (GO:0032680)	3/131	0.0854927	0.286867	2.98095	7.33112	ARG2;SELENOS;ZC3H12A	.
Regulation of Angiogenesis (GO:0045765)	4/211	0.0864926	0.286867	2.46377	6.03056	BTG1;ZC3H12A;TSPAN12;EPHA2	.
Positive Regulation of Interleukin-1 Production (GO:0032732)	2/63	0.0886564	0.286867	4.15742	10.0734	EGR1;MALT1	.
Regulation of Lamellipodium Organization (GO:1902743)	1/12	0.0908111	0.286867	11.4829	27.5472	EPHA2	.
V(D)J Recombination (GO:0033151)	1/12	0.0908111	0.286867	11.4829	27.5472	HMGB2	.
Regulation of Mitotic Sister Chromatid Separation (GO:0010965)	1/12	0.0908111	0.286867	11.4829	27.5472	INCENP	.
cAMP Metabolic Process (GO:0046058)	1/12	0.0908111	0.286867	11.4829	27.5472	EPHA2	.
Regulation of Retrograde Protein Transport, ER to Cytosol (GO:1904152)	1/12	0.0908111	0.286867	11.4829	27.5472	UBE2J1	.
Relaxation of Cardiac Muscle (GO:0055119)	1/12	0.0908111	0.286867	11.4829	27.5472	ATP2A2	.
Renal Filtration (GO:0097205)	1/12	0.0908111	0.286867	11.4829	27.5472	JCHAIN	.
Positive Regulation of CD4-positive, Alpha-Beta T Cell Activation (GO:2000516)	1/12	0.0908111	0.286867	11.4829	27.5472	ZBTB7B	.
Signal Peptide Processing (GO:0006465)	1/12	0.0908111	0.286867	11.4829	27.5472	HM13	.
Positive Regulation of Cellular Extravasation (GO:0002693)	1/12	0.0908111	0.286867	11.4829	27.5472	THY1	.
Sphingomyelin Metabolic Process (GO:0006684)	1/12	0.0908111	0.286867	11.4829	27.5472	OSBP	.
Positive Regulation of Insulin Receptor Signaling Pathway (GO:0046628)	1/12	0.0908111	0.286867	11.4829	27.5472	ZBTB7B	.
Glycosaminoglycan Catabolic Process (GO:0006027)	1/12	0.0908111	0.286867	11.4829	27.5472	HYAL3	.
Granulocyte Differentiation (GO:0030851)	1/12	0.0908111	0.286867	11.4829	27.5472	CSF3	.
Positive Regulation of Reactive Oxygen Species Biosynthetic Process (GO:1903428)	1/12	0.0908111	0.286867	11.4829	27.5472	RAB27A	.
Positive Regulation of Vascular Endothelial Cell Proliferation (GO:1905564)	1/12	0.0908111	0.286867	11.4829	27.5472	FGFR1	.
Midbrain Dopaminergic Neuron Differentiation (GO:1904948)	1/12	0.0908111	0.286867	11.4829	27.5472	NR4A2	.
Regulation of CD4-positive, Alpha-Beta T Cell Differentiation (GO:0043370)	1/12	0.0908111	0.286867	11.4829	27.5472	ZBTB7B	.
Regulation of PERK-mediated Unfolded Protein Response (GO:1903897)	1/12	0.0908111	0.286867	11.4829	27.5472	PPP1R15A	.
G1/S Transition of Mitotic Cell Cycle (GO:0000082)	2/64	0.0910589	0.286867	4.09016	9.80103	CCNA2;CCND2	.
Retinoid Metabolic Process (GO:0001523)	2/64	0.0910589	0.286867	4.09016	9.80103	RDH11;AKR1C4	.
Granulocyte Chemotaxis (GO:0071621)	2/64	0.0910589	0.286867	4.09016	9.80103	CXCL3;CXCL5	.
Monocarboxylic Acid Biosynthetic Process (GO:0072330)	2/64	0.0910589	0.286867	4.09016	9.80103	OSBP;AKR1C4	.
Cellular Response to Virus (GO:0098586)	2/65	0.0934804	0.286867	4.02503	9.53933	IFNGR2;ZC3H12A	.
Chloride Transmembrane Transport (GO:1902476)	2/65	0.0934804	0.286867	4.02503	9.53933	LRRC8A;SLC26A9	.
Positive Regulation of Cell Junction Assembly (GO:1901890)	2/65	0.0934804	0.286867	4.02503	9.53933	THY1;EPHA2	.
Fat Cell Differentiation (GO:0045444)	2/65	0.0934804	0.286867	4.02503	9.53933	NR4A2;ERAP1	.
Protein Targeting to Membrane (GO:0006612)	2/65	0.0934804	0.286867	4.02503	9.53933	GOLGA7B;TRAM1	.
Negative Regulation of Viral Process (GO:0048525)	2/66	0.0959206	0.286867	3.96194	9.28772	TNIP1;OASL	.
Cell Cycle G1/S Phase Transition (GO:0044843)	2/66	0.0959206	0.286867	3.96194	9.28772	CCNA2;CCND2	.
Regulation of Type I Interferon Production (GO:0032479)	2/66	0.0959206	0.286867	3.96194	9.28772	TRAF3IP3;UFD1	.
Regulation of Viral Genome Replication (GO:0045069)	2/66	0.0959206	0.286867	3.96194	9.28772	TNIP1;OASL	.
Positive Regulation of MAP Kinase Activity (GO:0043406)	2/66	0.0959206	0.286867	3.96194	9.28772	PDGFRB;FGFR1	.
Regulation of Cytoskeleton Organization (GO:0051493)	3/139	0.0978406	0.286867	2.80446	6.51873	PDGFRB;PEAK3;RHOF	.
MyD88-dependent Toll-Like Receptor Signaling Pathway (GO:0002755)	1/13	0.097998	0.286867	10.5255	24.4487	TNIP1	.
Body Fluid Secretion (GO:0007589)	1/13	0.097998	0.286867	10.5255	24.4487	ZBTB7B	.
Nucleotide Metabolic Process (GO:0009117)	1/13	0.097998	0.286867	10.5255	24.4487	ENPP3	.
Cellular Response to Acidic pH (GO:0071468)	1/13	0.097998	0.286867	10.5255	24.4487	SCNN1D	.
Cellular Response to Arsenic-Containing Substance (GO:0071243)	1/13	0.097998	0.286867	10.5255	24.4487	ZC3H12A	.
Positive Regulation by Symbiont of Entry Into Host (GO:0075294)	1/13	0.097998	0.286867	10.5255	24.4487	CD4	.
Positive Regulation of Alpha-Beta T Cell Differentiation (GO:0046638)	1/13	0.097998	0.286867	10.5255	24.4487	ZBTB7B	.
Positive Regulation of Brown Fat Cell Differentiation (GO:0090336)	1/13	0.097998	0.286867	10.5255	24.4487	ZBTB7B	.
Positive Regulation of Calcium Ion Import (GO:0090280)	1/13	0.097998	0.286867	10.5255	24.4487	PDGFRB	.
Positive Regulation of Cellular Response to Insulin Stimulus (GO:1900078)	1/13	0.097998	0.286867	10.5255	24.4487	ZBTB7B	.
Sulfate Transmembrane Transport (GO:1902358)	1/13	0.097998	0.286867	10.5255	24.4487	SLC26A9	.
Tertiary Alcohol Metabolic Process (GO:1902644)	1/13	0.097998	0.286867	10.5255	24.4487	AKR1C4	.
Positive Regulation of Myelination (GO:0031643)	1/13	0.097998	0.286867	10.5255	24.4487	CST7	.
Hyaluronan Metabolic Process (GO:0030212)	1/13	0.097998	0.286867	10.5255	24.4487	HYAL3	.
Positive Regulation of Viral Entry Into Host Cell (GO:0046598)	1/13	0.097998	0.286867	10.5255	24.4487	CD4	.
Programmed Necrotic Cell Death (GO:0097300)	1/13	0.097998	0.286867	10.5255	24.4487	MLKL	.
Membrane Protein Intracellular Domain Proteolysis (GO:0031293)	1/13	0.097998	0.286867	10.5255	24.4487	HM13	.
Regulation of ERK1 and ERK2 Cascade (GO:0070372)	4/223	0.100768	0.291822	2.32734	5.3411	PDGFRB;CD4;TNIP1;EPHA2	.
Regulation of T Cell Activation (GO:0050863)	2/68	0.100855	0.291822	3.84149	8.81266	CD4;THY1	.
Cellular Response to Starvation (GO:0009267)	3/141	0.101035	0.291822	2.76353	6.33481	KLF10;TBL2;ZC3H12A	.
Skin Development (GO:0043588)	2/69	0.103348	0.291822	3.78396	8.58828	COL1A2;EPHA2	.
Negative Regulation of Coagulation (GO:0050819)	1/14	0.105128	0.291822	9.71534	21.8845	PROCR	.
Regulation of Coagulation (GO:0050818)	1/14	0.105128	0.291822	9.71534	21.8845	PROCR	.
Negative Regulation of Muscle Cell Apoptotic Process (GO:0010656)	1/14	0.105128	0.291822	9.71534	21.8845	ZC3H12A	.
Negative Regulation of Neuroinflammatory Response (GO:0150079)	1/14	0.105128	0.291822	9.71534	21.8845	CST7	.
Negative Regulation of Protein Tyrosine Kinase Activity (GO:0061099)	1/14	0.105128	0.291822	9.71534	21.8845	GPRC5A	.
Relaxation of Muscle (GO:0090075)	1/14	0.105128	0.291822	9.71534	21.8845	ATP2A2	.
Response to Chemokine (GO:1990868)	1/14	0.105128	0.291822	9.71534	21.8845	ZC3H12A	.
Positive Regulation of T Cell Receptor Signaling Pathway (GO:0050862)	1/14	0.105128	0.291822	9.71534	21.8845	TRAT1	.
Cotranslational Protein Targeting to Membrane (GO:0006613)	1/14	0.105128	0.291822	9.71534	21.8845	TRAM1	.
Positive Regulation of Endothelial Cell Chemotaxis (GO:2001028)	1/14	0.105128	0.291822	9.71534	21.8845	FGFR1	.
Positive Regulation of Heart Rate (GO:0010460)	1/14	0.105128	0.291822	9.71534	21.8845	ATP2A2	.
Glucosamine-Containing Compound Metabolic Process (GO:1901071)	1/14	0.105128	0.291822	9.71534	21.8845	CHST4	.
Protein Homotrimerization (GO:0070207)	1/14	0.105128	0.291822	9.71534	21.8845	MLKL	.
miRNA Metabolic Process (GO:0010586)	1/14	0.105128	0.291822	9.71534	21.8845	ZC3H12A	.
Regulation of Actin Filament Organization (GO:0110053)	1/14	0.105128	0.291822	9.71534	21.8845	CSF3	.
Negative Regulation by Host of Viral Process (GO:0044793)	1/14	0.105128	0.291822	9.71534	21.8845	ZC3H12A	.
Negative Regulation of cGAS/STING Signaling Pathway (GO:0160049)	1/14	0.105128	0.291822	9.71534	21.8845	TREX1	.
Negative Regulation of Immune Response (GO:0050777)	2/70	0.105858	0.292408	3.72813	8.37209	TREX1;ENPP3	.
Regulation of Heart Contraction (GO:0008016)	2/70	0.105858	0.292408	3.72813	8.37209	S100A1;ATP2A2	.
Monoatomic Anion Transmembrane Transport (GO:0098656)	2/72	0.110928	0.292714	3.62125	7.96268	LRRC8A;SLC26A9	.
Proteolysis (GO:0006508)	5/321	0.111246	0.292714	2.01932	4.43444	DHH;HM13;GZMA;ERAP1;MALT1	.
- Reg of Endoplasmic Reticulum Stress-Induced Intrinsic Apoptotic Sgnlng Pway (GO:1902236)	1/15	0.112203	0.292714	9.02093	19.7328	SELENOS	.
Negative Regulation of Immune Effector Process (GO:0002698)	1/15	0.112203	0.292714	9.02093	19.7328	ENPP3	.
Regulation of Execution Phase of Apoptosis (GO:1900117)	1/15	0.112203	0.292714	9.02093	19.7328	ZC3H12A	.
N-acetylglucosamine Metabolic Process (GO:0006044)	1/15	0.112203	0.292714	9.02093	19.7328	CHST4	.
Regulation of Microglial Cell Activation (GO:1903978)	1/15	0.112203	0.292714	9.02093	19.7328	CST7	.
Regulation of Monocyte Differentiation (GO:0045655)	1/15	0.112203	0.292714	9.02093	19.7328	CD4	.
Regulation of Nitric-Oxide Synthase Activity (GO:0050999)	1/15	0.112203	0.292714	9.02093	19.7328	S100A1	.
Aorta Development (GO:0035904)	1/15	0.112203	0.292714	9.02093	19.7328	PDGFRB	.
Nitric Oxide Biosynthetic Process (GO:0006809)	1/15	0.112203	0.292714	9.02093	19.7328	ARG2	.
Cardiac Myofibril Assembly (GO:0055003)	1/15	0.112203	0.292714	9.02093	19.7328	PDGFRB	.
Pigment Granule Transport (GO:0051904)	1/15	0.112203	0.292714	9.02093	19.7328	RAB27A	.
Ceramide Transport (GO:0035627)	1/15	0.112203	0.292714	9.02093	19.7328	OSBP	.
Retinal Metabolic Process (GO:0042574)	1/15	0.112203	0.292714	9.02093	19.7328	RDH11	.
Positive Regulation of Mitotic Sister Chromatid Separation (GO:1901970)	1/15	0.112203	0.292714	9.02093	19.7328	INCENP	.
Glycoside Metabolic Process (GO:0016137)	1/15	0.112203	0.292714	9.02093	19.7328	AKR1C4	.
Positive Regulation of Regulated Secretory Pathway (GO:1903307)	1/15	0.112203	0.292714	9.02093	19.7328	RAB27A	.
Mammary Gland Epithelium Development (GO:0061180)	1/15	0.112203	0.292714	9.02093	19.7328	EPHA2	.
Melanosome Transport (GO:0032402)	1/15	0.112203	0.292714	9.02093	19.7328	RAB27A	.
Protein Trimerization (GO:0070206)	1/15	0.112203	0.292714	9.02093	19.7328	MLKL	.
Regulation of Golgi Organization (GO:1903358)	1/15	0.112203	0.292714	9.02093	19.7328	PDE4DIP	.
Regulation of IRE1-mediated Unfolded Protein Response (GO:1903894)	1/15	0.112203	0.292714	9.02093	19.7328	DNAJB9	.
Negative Regulation of Axon Extension (GO:0030517)	1/15	0.112203	0.292714	9.02093	19.7328	SEMA3G	.
Establishment of Protein Localization to Membrane (GO:0090150)	2/73	0.113486	0.294697	3.57006	7.76873	GOLGA7B;NPC1	.
Regulation of MAP Kinase Activity (GO:0043405)	2/73	0.113486	0.294697	3.57006	7.76873	PDGFRB;FGFR1	.
Cellular Response to Growth Factor Stimulus (GO:0071363)	3/150	0.115912	0.299249	2.59315	5.58804	IBSP;ACVR2B;FGFR1	.
Protein Localization to Organelle (GO:0033365)	3/151	0.117614	0.299249	2.5755	5.51246	PPP1R15A;TRAM1;DCP1A	.
Positive Regulation of Protein Localization to Nucleus (GO:1900182)	2/75	0.118648	0.299249	3.4719	7.40069	DTX3L;ZC3H12A	.
Positive Regulation of Protein Serine/Threonine Kinase Activity (GO:0071902)	2/75	0.118648	0.299249	3.4719	7.40069	PDGFRB;FGFR1	.
C21-steroid Hormone Metabolic Process (GO:0008207)	1/16	0.119222	0.299249	8.41911	17.9055	AKR1C4	.
Negative Regulation of Signaling Receptor Activity (GO:2000272)	1/16	0.119222	0.299249	8.41911	17.9055	GPRC5A	.
Peptide Catabolic Process (GO:0043171)	1/16	0.119222	0.299249	8.41911	17.9055	ERAP1	.
Regulation of Stem Cell Proliferation (GO:0072091)	1/16	0.119222	0.299249	8.41911	17.9055	HMGB2	.
Photoreceptor Cell Development (GO:0042461)	1/16	0.119222	0.299249	8.41911	17.9055	MAPRE2	.
Response to UV-B (GO:0010224)	1/16	0.119222	0.299249	8.41911	17.9055	HYAL3	.
Early Endosome to Golgi Transport (GO:0034498)	1/16	0.119222	0.299249	8.41911	17.9055	LMAN1	.
Establishment of Melanosome Localization (GO:0032401)	1/16	0.119222	0.299249	8.41911	17.9055	RAB27A	.
Positive Regulation of Lipid Storage (GO:0010884)	1/16	0.119222	0.299249	8.41911	17.9055	ZC3H12A	.
Membrane Raft Organization (GO:0031579)	1/16	0.119222	0.299249	8.41911	17.9055	NPC1	.
Reg of Blood Vessel Endothelial Cell Proliferation Inv in Sprouting Angiogenesis (GO:1903587)	1/16	0.119222	0.299249	8.41911	17.9055	FGFBP1	.
Glycoprotein Biosynthetic Process (GO:0009101)	2/76	0.12125	0.302321	3.42481	7.226	NPC1;TNIP1	.
Lymphocyte Differentiation (GO:0030098)	2/76	0.12125	0.302321	3.42481	7.226	CD4;DNAJB9	.
Protein Deubiquitination (GO:0016579)	2/76	0.12125	0.302321	3.42481	7.226	ZC3H12A;USP12	.
Negative Regulation of Response to External Stimulus (GO:0032102)	3/154	0.122775	0.302414	2.52395	5.29373	SELENOS;TREX1;ENPP3	.
3'-UTR-mediated mRNA Destabilization (GO:0061158)	1/17	0.126185	0.302414	7.89252	16.3375	ZC3H12A	.
DNA Conformation Change (GO:0071103)	1/17	0.126185	0.302414	7.89252	16.3375	HMGB2	.
Regulation of Endothelial Cell Chemotaxis (GO:2001026)	1/17	0.126185	0.302414	7.89252	16.3375	FGFR1	.
Negative Regulation of Inflammatory Response to Antigenic Stimulus (GO:0002862)	1/17	0.126185	0.302414	7.89252	16.3375	SELENOS	.
Regulation of Nucleocytoplasmic Transport (GO:0046822)	1/17	0.126185	0.302414	7.89252	16.3375	IFI27	.
Regulation of Protein Sumoylation (GO:0033233)	1/17	0.126185	0.302414	7.89252	16.3375	EGR1	.
Regulation of Receptor Recycling (GO:0001919)	1/17	0.126185	0.302414	7.89252	16.3375	TRAT1	.
Regulation of Ubiquitin-Protein Transferase Activity (GO:0051438)	1/17	0.126185	0.302414	7.89252	16.3375	DTX3L	.
Platelet-Derived Growth Factor Receptor Signaling Pathway (GO:0048008)	1/17	0.126185	0.302414	7.89252	16.3375	PDGFRB	.
Defense Response to Symbiont (GO:0140546)	1/17	0.126185	0.302414	7.89252	16.3375	LYZ	.
Sensory Perception of Taste (GO:0050909)	1/17	0.126185	0.302414	7.89252	16.3375	SCNN1D	.
Positive Regulation of Cell Migration Involved in Sprouting Angiogenesis (GO:0090050)	1/17	0.126185	0.302414	7.89252	16.3375	FGFBP1	.
Positive Regulation of Leukocyte Adhesion to Vascular Endothelial Cell (GO:1904996)	1/17	0.126185	0.302414	7.89252	16.3375	CHST4	.
Positive Regulation of Smooth Muscle Cell Migration (GO:0014911)	1/17	0.126185	0.302414	7.89252	16.3375	PDGFRB	.
Intracellular Sodium Ion Homeostasis (GO:0006883)	1/17	0.126185	0.302414	7.89252	16.3375	SCNN1D	.
Myeloid Cell Activation Involved in Immune Response (GO:0002275)	1/17	0.126185	0.302414	7.89252	16.3375	ENPP3	.
Regulation of Brown Fat Cell Differentiation (GO:0090335)	1/17	0.126185	0.302414	7.89252	16.3375	ZBTB7B	.
Regulation of Small GTPase Mediated Signal Transduction (GO:0051056)	3/157	0.128018	0.302414	2.4744	5.08634	STARD8;DENND3;RHOF	.
Response to Tumor Necrosis Factor (GO:0034612)	2/80	0.131798	0.302414	3.24852	6.58307	HYAL3;ZC3H12A	.
Regulation of Epidermal Cell Differentiation (GO:0045604)	1/18	0.133094	0.302414	7.42788	14.9798	MAFF	.
Regulation of Microtubule Nucleation (GO:0010968)	1/18	0.133094	0.302414	7.42788	14.9798	PDE4DIP	.
Aorta Morphogenesis (GO:0035909)	1/18	0.133094	0.302414	7.42788	14.9798	PDGFRB	.
Regulation of Oxidoreductase Activity (GO:0051341)	1/18	0.133094	0.302414	7.42788	14.9798	GZMA	.
Nuclear Chromosome Segregation (GO:0098813)	1/18	0.133094	0.302414	7.42788	14.9798	INCENP	.
Nucleobase-Containing Small Molecule Metabolic Process (GO:0055086)	1/18	0.133094	0.302414	7.42788	14.9798	ENTPD4	.
Nucleoside Phosphate Catabolic Process (GO:1901292)	1/18	0.133094	0.302414	7.42788	14.9798	ENPP3	.
Regulation of Steroid Biosynthetic Process (GO:0050810)	1/18	0.133094	0.302414	7.42788	14.9798	EGR1	.
Peptidyl-Lysine Methylation (GO:0018022)	1/18	0.133094	0.302414	7.42788	14.9798	EEF1AKMT3	.
Phosphate Ion Transport (GO:0006817)	1/18	0.133094	0.302414	7.42788	14.9798	SLC20A1	.
Regulation of Vascular Endothelial Cell Proliferation (GO:1905562)	1/18	0.133094	0.302414	7.42788	14.9798	FGFR1	.
Regulation of Viral Entry Into Host Cell (GO:0046596)	1/18	0.133094	0.302414	7.42788	14.9798	CD4	.
Positive Regulation of Antigen Receptor-Mediated Signaling Pathway (GO:0050857)	1/18	0.133094	0.302414	7.42788	14.9798	TRAT1	.
Positive Regulation of Chromosome Segregation (GO:0051984)	1/18	0.133094	0.302414	7.42788	14.9798	NCAPG2	.
Embryo Development Ending in Birth or Egg Hatching (GO:0009792)	1/18	0.133094	0.302414	7.42788	14.9798	FGFR1	.
Positive Regulation of Focal Adhesion Assembly (GO:0051894)	1/18	0.133094	0.302414	7.42788	14.9798	THY1	.
Establishment of Chromosome Localization (GO:0051303)	1/18	0.133094	0.302414	7.42788	14.9798	INCENP	.
Positive Regulation of Sprouting Angiogenesis (GO:1903672)	1/18	0.133094	0.302414	7.42788	14.9798	S100A1	.
Intracellular Lipid Transport (GO:0032365)	1/18	0.133094	0.302414	7.42788	14.9798	NPC1	.
Intracellular Monoatomic Ion Homeostasis (GO:0006873)	1/18	0.133094	0.302414	7.42788	14.9798	CNNM4	.
Melanosome Localization (GO:0032400)	1/18	0.133094	0.302414	7.42788	14.9798	RAB27A	.
Purine Ribonucleotide Catabolic Process (GO:0009154)	1/18	0.133094	0.302414	7.42788	14.9798	ENTPD4	.
Regulation of Activin Receptor Signaling Pathway (GO:0032925)	1/18	0.133094	0.302414	7.42788	14.9798	ACVR2B	.
Regulation of Bicellular Tight Junction Assembly (GO:2000810)	1/18	0.133094	0.302414	7.42788	14.9798	EPHA2	.
Protein Modification by Small Protein Removal (GO:0070646)	2/81	0.134467	0.304919	3.20724	6.43511	ZC3H12A;USP12	.
Regulation of Inflammatory Response (GO:0050727)	4/249	0.135097	0.305073	2.0776	4.15886	SELENOS;TNIP1;NFKBIZ;ENPP3	.
Positive Regulation of Cell Motility (GO:2000147)	4/249	0.135097	0.305073	2.0776	4.15886	PDGFRB;SEMA3G;EPHA2;HBEGF	.
Response to Insulin (GO:0032868)	2/82	0.137149	0.305073	3.16699	6.29182	SELENOS;ZBTB7B	.
Positive Regulation of Response to External Stimulus (GO:0032103)	3/163	0.138738	0.305073	2.38089	4.70266	PDGFRB;TNIP1;NFKBIZ	.
Negative Regulation of Protein Phosphorylation (GO:0001933)	2/83	0.139842	0.305073	3.12773	6.153	ZC3H12A;THY1	.
Regulation of Protein Kinase Activity (GO:0045859)	2/83	0.139842	0.305073	3.12773	6.153	CD4;THY1	.
DNA Catabolic Process (GO:0006308)	1/19	0.139949	0.305073	7.01486	13.7946	TREX1	.
Regulation of Megakaryocyte Differentiation (GO:0045652)	1/19	0.139949	0.305073	7.01486	13.7946	HMGB2	.
Negative Regulation of Transferase Activity (GO:0051348)	1/19	0.139949	0.305073	7.01486	13.7946	DTX3L	.
Antigen Processing and Presentation of Peptide Antigen via MHC Class I (GO:0002474)	1/19	0.139949	0.305073	7.01486	13.7946	ERAP1	.
Calcium-Independent Cell-Cell Adhesion via Plasma Membrane Cell-Adhesion Molecules (GO:0016338)	1/19	0.139949	0.305073	7.01486	13.7946	CLDN15	.
Regulation of Smooth Muscle Cell Migration (GO:0014910)	1/19	0.139949	0.305073	7.01486	13.7946	PDGFRB	.
Phosphatidylcholine Biosynthetic Process (GO:0006656)	1/19	0.139949	0.305073	7.01486	13.7946	SH2D3C	.
Response to Acidic pH (GO:0010447)	1/19	0.139949	0.305073	7.01486	13.7946	SCNN1D	.
Response to Fibroblast Growth Factor (GO:0071774)	1/19	0.139949	0.305073	7.01486	13.7946	FGFR1	.
Positive Regulation of Alcohol Biosynthetic Process (GO:1902932)	1/19	0.139949	0.305073	7.01486	13.7946	CD244	.
Positive Regulation of Cation Transmembrane Transport (GO:1904064)	1/19	0.139949	0.305073	7.01486	13.7946	TOR2A	.
Vasculature Development (GO:0001944)	1/19	0.139949	0.305073	7.01486	13.7946	PDGFRB	.
Immunoglobulin Mediated Immune Response (GO:0016064)	1/19	0.139949	0.305073	7.01486	13.7946	CD19	.
Protein Localization to Endoplasmic Reticulum (GO:0070972)	1/19	0.139949	0.305073	7.01486	13.7946	PPP1R15A	.
Macromolecule Modification (GO:0043412)	2/84	0.142547	0.310136	3.08943	6.01847	ERO1A;RABGGTB	.
B Cell Mediated Immunity (GO:0019724)	1/20	0.14675	0.315023	6.64532	12.7525	CD19	.
Regulation of Mitotic Cell Cycle Spindle Assembly Checkpoint (GO:0090266)	1/20	0.14675	0.315023	6.64532	12.7525	INCENP	.
Dolichol-Linked Oligosaccharide Biosynthetic Process (GO:0006488)	1/20	0.14675	0.315023	6.64532	12.7525	DPAGT1	.
Positive Regulation of Monooxygenase Activity (GO:0032770)	1/20	0.14675	0.315023	6.64532	12.7525	S100A1	.
Positive Regulation of Osteoclast Differentiation (GO:0045672)	1/20	0.14675	0.315023	6.64532	12.7525	TM4SF19	.
Regulation of T Cell Cytokine Production (GO:0002724)	1/20	0.14675	0.315023	6.64532	12.7525	MALT1	.
Regulation of Cardiac Conduction (GO:1903779)	1/20	0.14675	0.315023	6.64532	12.7525	ATP2A2	.
Regulation of Innate Immune Response (GO:0045088)	2/86	0.14799	0.317081	3.01557	5.76158	TREX1;ERAP1	.
Cellular Response to Tumor Necrosis Factor (GO:0071356)	2/87	0.150727	0.318585	2.97994	5.6389	HYAL3;ZC3H12A	.
Positive Regulation of Biosynthetic Process (GO:0009891)	2/87	0.150727	0.318585	2.97994	5.6389	EGR1;RAB27A	.
Defense Response to Gram-negative Bacterium (GO:0050829)	2/87	0.150727	0.318585	2.97994	5.6389	HMGB2;LYZ	.
Regulation of MAPK Cascade (GO:0043408)	4/260	0.150889	0.318585	1.98722	3.75824	CD4;STK40;EPHA2;FGFR1	.
Regulation of Macromolecule Biosynthetic Process (GO:0010556)	3/170	0.151613	0.318585	2.28028	4.30157	DHH;ZC3H12A;NFKBIZ	.
Regulation of Endothelial Cell Migration (GO:0010594)	2/88	0.153474	0.318585	2.94514	5.51985	ZC3H12A;EPHA2	.
Regulation of Type II Interferon Production (GO:0032649)	2/88	0.153474	0.318585	2.94514	5.51985	ZC3H12A;CD244	.
Positive Regulation of Endothelial Cell Migration (GO:0010595)	2/88	0.153474	0.318585	2.94514	5.51985	ZC3H12A;FGFR1	.
DNA Repair-Dependent Chromatin Remodeling (GO:0140861)	1/21	0.153497	0.318585	6.31274	11.8305	DTX3L	.
Regulation of Epithelial Cell Differentiation (GO:0030856)	1/21	0.153497	0.318585	6.31274	11.8305	MAFF	.
Negative Regulation of Leukocyte Activation (GO:0002695)	1/21	0.153497	0.318585	6.31274	11.8305	ZC3H12A	.
Antigen Processing and Presentation of Endogenous Peptide Antigen (GO:0002483)	1/21	0.153497	0.318585	6.31274	11.8305	ERAP1	.
Neuromuscular Synaptic Transmission (GO:0007274)	1/21	0.153497	0.318585	6.31274	11.8305	SH2D3C	.
Cellular Response to pH (GO:0071467)	1/21	0.153497	0.318585	6.31274	11.8305	SCNN1D	.
Endoplasmic Reticulum Calcium Ion Homeostasis (GO:0032469)	1/21	0.153497	0.318585	6.31274	11.8305	ATP2A2	.
Positive Regulation of Smoothened Signaling Pathway (GO:0045880)	1/21	0.153497	0.318585	6.31274	11.8305	DHH	.
Protein Insertion Into Membrane (GO:0051205)	1/21	0.153497	0.318585	6.31274	11.8305	TRAM1	.
Nuclear-Transcribed mRNA Catabolic Process (GO:0000956)	2/89	0.156231	0.322963	2.91114	5.40429	ZC3H12A;DCP1A	.
Chloride Transport (GO:0006821)	2/90	0.158998	0.322963	2.87791	5.29209	LRRC8A;SLC26A9	.
Mitotic Spindle Organization (GO:0007052)	2/90	0.158998	0.322963	2.87791	5.29209	INCENP;ZNF207	.
Nitric Oxide Metabolic Process (GO:0046209)	1/22	0.160192	0.322963	6.01183	11.01	ARG2	.
Oligosaccharide Biosynthetic Process (GO:0009312)	1/22	0.160192	0.322963	6.01183	11.01	B4GALNT2	.
Early Endosome to Late Endosome Transport (GO:0045022)	1/22	0.160192	0.322963	6.01183	11.01	FHIP1B	.
Positive Regulation of Epithelial Cell Differentiation (GO:0030858)	1/22	0.160192	0.322963	6.01183	11.01	BTG1	.
Positive Regulation of Heart Contraction (GO:0045823)	1/22	0.160192	0.322963	6.01183	11.01	ATP2A2	.
Focal Adhesion Assembly (GO:0048041)	1/22	0.160192	0.322963	6.01183	11.01	THY1	.
Positive Regulation of Nervous System Process (GO:0031646)	1/22	0.160192	0.322963	6.01183	11.01	CST7	.
Positive Regulation of p38MAPK Cascade (GO:1900745)	1/22	0.160192	0.322963	6.01183	11.01	ZC3H12A	.
Mammary Gland Development (GO:0030879)	1/22	0.160192	0.322963	6.01183	11.01	ZBTB7B	.
Modulation by Host of Viral Process (GO:0044788)	1/22	0.160192	0.322963	6.01183	11.01	IFI27	.
Negative Regulation of T Cell Receptor Signaling Pathway (GO:0050860)	1/22	0.160192	0.322963	6.01183	11.01	THY1	.
Regulation of Calcium Ion Import (GO:0090279)	1/22	0.160192	0.322963	6.01183	11.01	PDGFRB	.
Regulation of Cardiac Muscle Contraction by Calcium Ion Signaling (GO:0010882)	1/22	0.160192	0.322963	6.01183	11.01	ATP2A2	.
Protein K48-linked Ubiquitination (GO:0070936)	2/91	0.161774	0.32557	2.84543	5.18312	DTX3L;IFI27	.
Phosphatidylinositol-Mediated Signaling (GO:0048015)	1/23	0.166834	0.329284	5.73827	10.2759	FGFR1	.
Positive Regulation of T Cell Cytokine Production (GO:0002726)	1/23	0.166834	0.329284	5.73827	10.2759	MALT1	.
Cholesterol Efflux (GO:0033344)	1/23	0.166834	0.329284	5.73827	10.2759	NPC1	.
Retinol Metabolic Process (GO:0042572)	1/23	0.166834	0.329284	5.73827	10.2759	RDH11	.
Sodium Ion Import Across Plasma Membrane (GO:0098719)	1/23	0.166834	0.329284	5.73827	10.2759	SCNN1D	.
Positive Regulation of mRNA Splicing, via Spliceosome (GO:0048026)	1/23	0.166834	0.329284	5.73827	10.2759	RBM3	.
Positive Regulation of Phosphate Metabolic Process (GO:0045937)	1/23	0.166834	0.329284	5.73827	10.2759	CD244	.
Immune Response-Activating Cell Surface Receptor Signaling Pathway (GO:0002429)	1/23	0.166834	0.329284	5.73827	10.2759	CD19	.
Positive Regulation of Viral Life Cycle (GO:1903902)	1/23	0.166834	0.329284	5.73827	10.2759	CD4	.
Prostanoid Metabolic Process (GO:0006692)	1/23	0.166834	0.329284	5.73827	10.2759	AKR1C4	.
Lymphocyte Activation Involved in Immune Response (GO:0002285)	1/23	0.166834	0.329284	5.73827	10.2759	CD244	.
Regulation of Immune Response (GO:0050776)	2/94	0.170153	0.335249	2.75223	4.87435	ERAP1;CSK	.
Regulation of Lipid Storage (GO:0010883)	1/24	0.173423	0.338027	5.48851	9.61598	ZC3H12A	.
Osteoclast Differentiation (GO:0030316)	1/24	0.173423	0.338027	5.48851	9.61598	EPHA2	.
Macrophage Differentiation (GO:0030225)	1/24	0.173423	0.338027	5.48851	9.61598	CD4	.
Mismatch Repair (GO:0006298)	1/24	0.173423	0.338027	5.48851	9.61598	TREX1	.
Negative Regulation of DNA Binding (GO:0043392)	1/24	0.173423	0.338027	5.48851	9.61598	GZMA	.
B Cell Activation (GO:0042113)	2/96	0.17578	0.338027	2.6934	4.68254	DNAJB9;MALT1	.
Cellular Component Assembly (GO:0022607)	4/277	0.17659	0.338027	1.86185	3.22831	PDE4DIP;DNAJB14;MAPRE2;JCHAIN	.
Regulation of Organelle Organization (GO:0033043)	2/97	0.178604	0.338027	2.66491	4.59054	LMAN1;PDE4DIP	.
Negative Regulation of Epidermal Growth Factor Receptor Signaling Pathway (GO:0042059)	1/25	0.179961	0.338027	5.25955	9.02022	GPRC5A	.
Negative Regulation of Interleukin-1 Beta Production (GO:0032691)	1/25	0.179961	0.338027	5.25955	9.02022	ZC3H12A	.
Negative Regulation of Non-Canonical NF-kappaB Signal Transduction (GO:1901223)	1/25	0.179961	0.338027	5.25955	9.02022	ZC3H12A	.
Activin Receptor Signaling Pathway (GO:0032924)	1/25	0.179961	0.338027	5.25955	9.02022	ACVR2B	.
Regulation of Protein Export From Nucleus (GO:0046825)	1/25	0.179961	0.338027	5.25955	9.02022	IFI27	.
Bile Acid and Bile Salt Transport (GO:0015721)	1/25	0.179961	0.338027	5.25955	9.02022	AKR1C4	.
Nucleic Acid Metabolic Process (GO:0090304)	1/25	0.179961	0.338027	5.25955	9.02022	TREX1	.
Cardiac Conduction System Development (GO:0003161)	1/25	0.179961	0.338027	5.25955	9.02022	MSX2	.
Organophosphate Ester Transport (GO:0015748)	1/25	0.179961	0.338027	5.25955	9.02022	OSBP	.
Cardiac Muscle Cell Development (GO:0055013)	1/25	0.179961	0.338027	5.25955	9.02022	PDGFRB	.
Cell Surface Receptor Protein Serine/Threonine Kinase Signaling Pathway (GO:0007178)	1/25	0.179961	0.338027	5.25955	9.02022	ACVR2B	.
Response to Hexose (GO:0009746)	1/25	0.179961	0.338027	5.25955	9.02022	SELENOS	.
Sodium Ion Homeostasis (GO:0055078)	1/25	0.179961	0.338027	5.25955	9.02022	SCNN1D	.
Dopaminergic Neuron Differentiation (GO:0071542)	1/25	0.179961	0.338027	5.25955	9.02022	NR4A2	.
Sulfur Compound Transport (GO:0072348)	1/25	0.179961	0.338027	5.25955	9.02022	SLC26A9	.
Positive Regulation of Interleukin-17 Production (GO:0032740)	1/25	0.179961	0.338027	5.25955	9.02022	ZBTB7B	.
Receptor Clustering (GO:0043113)	1/25	0.179961	0.338027	5.25955	9.02022	THY1	.
Regulation of B Cell Activation (GO:0050864)	1/25	0.179961	0.338027	5.25955	9.02022	CD19	.
Negative Chemotaxis (GO:0050919)	1/25	0.179961	0.338027	5.25955	9.02022	SEMA3G	.
Negative Regulation of Catalytic Activity (GO:0043086)	1/25	0.179961	0.338027	5.25955	9.02022	GZMA	.
Regulation of Gene Expression (GO:0010468)	12/1127	0.181042	0.338539	1.38045	2.35923	EGR1;TOR2A;BTG1;DHH;ZC3H12A;NFKBIZ;IRF2;RAB27A;SLC26A9;ZBTB7B;FER1L6;ACVR2B	.
Defense Response to Gram-positive Bacterium (GO:0050830)	2/98	0.181435	0.338539	2.63702	4.50101	HMGB2;LYZ	.
Positive Regulation of Hydrolase Activity (GO:0051345)	2/98	0.181435	0.338539	2.63702	4.50101	THY1;MAPRE2	.
Positive Regulation of Protein Modification Process (GO:0031401)	2/98	0.181435	0.338539	2.63702	4.50101	EGR1;CD4	.
Gene Expression (GO:0010467)	5/381	0.184105	0.342783	1.69187	2.86307	NR4A2;RBM3;DUSP11;TNIP1;GZMA	.
Positive Regulation of Cell Population Proliferation (GO:0008284)	6/484	0.185065	0.342783	1.5991	2.69775	PDGFRB;CSF3;CCND2;CXCL5;FGFR1;HBEGF	.
Reg of Endoplasmic Reticulum Stress-Induced Intrinsic Apoptotic Sgnlng Pway (GO:1902235)	1/26	0.186447	0.342783	5.04892	8.48019	SELENOS	.
Regulation of Glycogen Biosynthetic Process (GO:0005979)	1/26	0.186447	0.342783	5.04892	8.48019	SELENOS	.
Positive Regulation of mRNA Processing (GO:0050685)	1/26	0.186447	0.342783	5.04892	8.48019	RBM3	.
Vesicle-Mediated Transport Between Endosomal Compartments (GO:0098927)	1/26	0.186447	0.342783	5.04892	8.48019	FHIP1B	.
Positive Regulation of Nuclear Division (GO:0051785)	1/26	0.186447	0.342783	5.04892	8.48019	PDGFRB	.
Microtubule Polymerization or Depolymerization (GO:0031109)	1/26	0.186447	0.342783	5.04892	8.48019	ZNF207	.
Regulation of Cardiac Muscle Cell Contraction (GO:0086004)	1/26	0.186447	0.342783	5.04892	8.48019	ATP2A2	.
Negative Regulation of Cytokine Production (GO:0001818)	3/191	0.192289	0.344499	2.0234	3.3361	SELENOS;ZC3H12A;UFD1	.
ER-nucleus Signaling Pathway (GO:0006984)	1/27	0.192883	0.344499	4.85448	7.98889	SELENOS	.
Negative Regulation of Neurogenesis (GO:0050768)	1/27	0.192883	0.344499	4.85448	7.98889	THY1	.
Regulation of Kinase Activity (GO:0043549)	1/27	0.192883	0.344499	4.85448	7.98889	CD4	.
Negative Regulation of Protein Localization to Plasma Membrane (GO:1903077)	1/27	0.192883	0.344499	4.85448	7.98889	CSK	.
Regulation of Microtubule Polymerization or Depolymerization (GO:0031110)	1/27	0.192883	0.344499	4.85448	7.98889	MAPRE2	.
Amide Transport (GO:0042886)	1/27	0.192883	0.344499	4.85448	7.98889	OSBP	.
Regulation of Myelination (GO:0031641)	1/27	0.192883	0.344499	4.85448	7.98889	CST7	.
Regulation of Myeloid Cell Differentiation (GO:0045637)	1/27	0.192883	0.344499	4.85448	7.98889	CSF3	.
Nuclear-Transcribed mRNA Catabolic Process, Nonsense-Mediated Decay (GO:0000184)	1/27	0.192883	0.344499	4.85448	7.98889	ZC3H12A	.
Regulation of Reactive Oxygen Species Biosynthetic Process (GO:1903426)	1/27	0.192883	0.344499	4.85448	7.98889	RAB27A	.
Peptide Hormone Secretion (GO:0030072)	1/27	0.192883	0.344499	4.85448	7.98889	TOR2A	.
Cellular Catabolic Process (GO:0044248)	1/27	0.192883	0.344499	4.85448	7.98889	ERAP1	.
Spindle Assembly Checkpoint Signaling (GO:0071173)	1/27	0.192883	0.344499	4.85448	7.98889	ZNF207	.
Positive Regulation of Erythrocyte Differentiation (GO:0045648)	1/27	0.192883	0.344499	4.85448	7.98889	HMGB2	.
Protein Quality Control for Misfolded or Incompletely Synthesized Proteins (GO:0006515)	1/27	0.192883	0.344499	4.85448	7.98889	ANKZF1	.
Mitotic Spindle Assembly Checkpoint Signaling (GO:0007094)	1/27	0.192883	0.344499	4.85448	7.98889	ZNF207	.
Mitotic Spindle Checkpoint Signaling (GO:0071174)	1/27	0.192883	0.344499	4.85448	7.98889	ZNF207	.
Regulation of Glucose Metabolic Process (GO:0010906)	1/28	0.199268	0.348718	4.67445	7.54039	SELENOS	.
Negative Regulation of Protein Transport (GO:0051224)	1/28	0.199268	0.348718	4.67445	7.54039	CSK	.
Negative Regulation of Signaling (GO:0023057)	1/28	0.199268	0.348718	4.67445	7.54039	TRAT1	.
Negative Regulation of Type II Interferon Production (GO:0032689)	1/28	0.199268	0.348718	4.67445	7.54039	ZC3H12A	.
Regulation of Protein Modification by Small Protein Conjugation or Removal (GO:1903320)	1/28	0.199268	0.348718	4.67445	7.54039	EGR1	.
Carbohydrate Biosynthetic Process (GO:0016051)	1/28	0.199268	0.348718	4.67445	7.54039	B4GALNT2	.
Phospholipid Biosynthetic Process (GO:0008654)	1/28	0.199268	0.348718	4.67445	7.54039	OSBP	.
Toll-Like Receptor 4 Signaling Pathway (GO:0034142)	1/28	0.199268	0.348718	4.67445	7.54039	TNIP3	.
Positive Regulation of Leukocyte Migration (GO:0002687)	1/28	0.199268	0.348718	4.67445	7.54039	THY1	.
Positive Regulation of Signal Transduction by P53 Class Mediator (GO:1901798)	1/28	0.199268	0.348718	4.67445	7.54039	PPP1R15A	.
Regulation of DNA Biosynthetic Process (GO:2000278)	1/28	0.199268	0.348718	4.67445	7.54039	PDGFRB	.
Regulation of Calcium Ion Transmembrane Transport (GO:1903169)	1/28	0.199268	0.348718	4.67445	7.54039	TOR2A	.
Regulation of Cardiac Muscle Cell Action Potential (GO:0098901)	1/28	0.199268	0.348718	4.67445	7.54039	ATP2A2	.
Organic Anion Transport (GO:0015711)	2/105	0.201429	0.351954	2.45693	3.93679	SLC46A2;LRRC8A	.
Steroid Metabolic Process (GO:0008202)	2/106	0.204307	0.354845	2.43319	3.86422	NPC1;AKR1C4	.
Negative Regulation of Interleukin-1 Production (GO:0032692)	1/29	0.205602	0.354845	4.50728	7.12967	ZC3H12A	.
Negative Regulation of Mitotic Metaphase/Anaphase Transition (GO:0045841)	1/29	0.205602	0.354845	4.50728	7.12967	ZNF207	.
Regulation of Supramolecular Fiber Organization (GO:1902903)	1/29	0.205602	0.354845	4.50728	7.12967	CSF3	.
Cell-Substrate Junction Assembly (GO:0007044)	1/29	0.205602	0.354845	4.50728	7.12967	THY1	.
Cytoplasmic Pattern Recognition Receptor Signaling Pathway (GO:0002753)	1/29	0.205602	0.354845	4.50728	7.12967	TRAF3IP3	.
Positive Regulation of Protein Import Into Nucleus (GO:0042307)	1/29	0.205602	0.354845	4.50728	7.12967	ZC3H12A	.
Protein Methylation (GO:0006479)	1/29	0.205602	0.354845	4.50728	7.12967	EEF1AKMT3	.
Cell Surface Receptor Protein Tyrosine Kinase Signaling Pathway (GO:0007169)	4/296	0.206925	0.356582	1.73901	2.73964	PDGFRB;CD4;EPHA2;FGFR1	.
Negative Regulation of Cytokine Production Involved in Inflammatory Response (GO:1900016)	1/30	0.211887	0.359634	4.35164	6.75244	ZC3H12A	.
Negative Regulation of Ossification (GO:0030279)	1/30	0.211887	0.359634	4.35164	6.75244	ACVR2B	.
Negative Regulation of Response to Endoplasmic Reticulum Stress (GO:1903573)	1/30	0.211887	0.359634	4.35164	6.75244	SELENOS	.
Cell Surface Toll-Like Receptor Signaling Pathway (GO:0140895)	1/30	0.211887	0.359634	4.35164	6.75244	TNIP3	.
Positive Regulation of Microtubule Polymerization (GO:0031116)	1/30	0.211887	0.359634	4.35164	6.75244	PDE4DIP	.
Heterotypic Cell-Cell Adhesion (GO:0034113)	1/30	0.211887	0.359634	4.35164	6.75244	THY1	.
Prostaglandin Metabolic Process (GO:0006693)	1/30	0.211887	0.359634	4.35164	6.75244	AKR1C4	.
Protein Insertion Into ER Membrane (GO:0045048)	1/30	0.211887	0.359634	4.35164	6.75244	TRAM1	.
Negative Regulation of Antigen Receptor-Mediated Signaling Pathway (GO:0050858)	1/30	0.211887	0.359634	4.35164	6.75244	THY1	.
Regulation of Chemotaxis (GO:0050920)	1/30	0.211887	0.359634	4.35164	6.75244	PDGFRB	.
Positive Regulation of Vasculature Development (GO:1904018)	2/109	0.212967	0.360567	2.36461	3.65714	BTG1;ZC3H12A	.
Protein Metabolic Process (GO:0019538)	7/614	0.213077	0.360567	1.46901	2.27124	ERO1A;TNIP1;GZMA;ERAP1;DENND3;RABGGTB;MALT1	.
Regulation of Immunoglobulin Production (GO:0002637)	1/31	0.218123	0.364709	4.20637	6.40503	DNAJB9	.
Regulation of Macrophage Activation (GO:0043030)	1/31	0.218123	0.364709	4.20637	6.40503	ZC3H12A	.
Activation of GTPase Activity (GO:0090630)	1/31	0.218123	0.364709	4.20637	6.40503	EPHA2	.
Artery Morphogenesis (GO:0048844)	1/31	0.218123	0.364709	4.20637	6.40503	PDGFRB	.
Nuclear-Transcribed mRNA Catabolic Process, Deadenylation-Dependent Decay (GO:0000288)	1/31	0.218123	0.364709	4.20637	6.40503	DCP1A	.
Leukocyte Cell-Cell Adhesion (GO:0007159)	1/31	0.218123	0.364709	4.20637	6.40503	TNIP1	.
Mesenchymal Cell Migration (GO:0090497)	1/31	0.218123	0.364709	4.20637	6.40503	SEMA3G	.
Multivesicular Body Organization (GO:0036257)	1/31	0.218123	0.364709	4.20637	6.40503	RAB27A	.
External Encapsulating Structure Organization (GO:0045229)	2/111	0.218761	0.364709	2.32098	3.52737	COL1A2;IBSP	.
Extracellular Structure Organization (GO:0043062)	2/111	0.218761	0.364709	2.32098	3.52737	COL1A2;IBSP	.
Negative Regulation of Transcription by RNA Polymerase II (GO:0000122)	8/732	0.22299	0.370554	1.40832	2.11337	NR4A2;KLF10;MSX2;IFI27;MAFF;IRF2;HMGB2;ACVR2B	.
Regulation of Lamellipodium Assembly (GO:0010591)	1/32	0.224309	0.370554	4.07047	6.08426	EPHA2	.
Regulation of Regulated Secretory Pathway (GO:1903305)	1/32	0.224309	0.370554	4.07047	6.08426	RAB27A	.
Positive Regulation of Locomotion (GO:0040017)	1/32	0.224309	0.370554	4.07047	6.08426	PDGFRB	.
Purine Ribonucleoside Triphosphate Metabolic Process (GO:0009205)	1/32	0.224309	0.370554	4.07047	6.08426	ENPP3	.
Regulation of Cell Migration Involved in Sprouting Angiogenesis (GO:0090049)	1/32	0.224309	0.370554	4.07047	6.08426	FGFBP1	.
Mitotic Cell Cycle Phase Transition (GO:0044772)	2/113	0.224568	0.370554	2.27893	3.40376	CCNA2;CCND2	.
Regulation of Interleukin-6 Production (GO:0032675)	2/114	0.227476	0.374256	2.25847	3.34414	SELENOS;ZC3H12A	.
Transforming Growth Factor Beta Receptor Superfamily Signaling Pathway (GO:0141091)	2/114	0.227476	0.374256	2.25847	3.34414	COL1A2;ACVR2B	.
Positive Regulation of Inflammatory Response (GO:0050729)	2/115	0.230387	0.375308	2.23837	3.28592	TNIP1;NFKBIZ	.
Negative Regulation of Developmental Growth (GO:0048640)	1/33	0.230447	0.375308	3.94307	5.78739	SEMA3G	.
B Cell Receptor Signaling Pathway (GO:0050853)	1/33	0.230447	0.375308	3.94307	5.78739	CD19	.
Rescue of Stalled Ribosome (GO:0072344)	1/33	0.230447	0.375308	3.94307	5.78739	ANKZF1	.
Positive Regulation of G1/S Transition of Mitotic Cell Cycle (GO:1900087)	1/33	0.230447	0.375308	3.94307	5.78739	CCND2	.
Vasculogenesis (GO:0001570)	1/33	0.230447	0.375308	3.94307	5.78739	PDGFRB	.
Regulation of Cell Adhesion Mediated by Integrin (GO:0033628)	1/33	0.230447	0.375308	3.94307	5.78739	EPHA2	.
Protein Complex Oligomerization (GO:0051259)	2/116	0.2333	0.379407	2.21862	3.22905	ZC3H12A;LRRC8A	.
Regulation of Gluconeogenesis (GO:0006111)	1/34	0.236536	0.382462	3.82339	5.51201	SELENOS	.
JNK Cascade (GO:0007254)	1/34	0.236536	0.382462	3.82339	5.51201	SH2D3C	.
Regulation of Response to Biotic Stimulus (GO:0002831)	1/34	0.236536	0.382462	3.82339	5.51201	ERAP1	.
Positive Regulation of Carbohydrate Metabolic Process (GO:0045913)	1/34	0.236536	0.382462	3.82339	5.51201	CD244	.
DNA Damage Response (GO:0006974)	5/421	0.240302	0.384508	1.52605	2.17593	PPP1R15A;DTX3L;TREX1;ZC3H12A;EPHA2	.
MAPK Cascade (GO:0000165)	2/119	0.242053	0.384508	2.16141	3.06617	SH2D3C;FGFR1	.
Regulation of Interleukin-17 Production (GO:0032660)	1/35	0.242578	0.384508	3.71075	5.25603	ZBTB7B	.
Adherens Junction Organization (GO:0034332)	1/35	0.242578	0.384508	3.71075	5.25603	CSK	.
Neural Crest Cell Migration (GO:0001755)	1/35	0.242578	0.384508	3.71075	5.25603	SEMA3G	.
Regulation of p38MAPK Cascade (GO:1900744)	1/35	0.242578	0.384508	3.71075	5.25603	ZC3H12A	.
Cellular Response to Hydrogen Peroxide (GO:0070301)	1/35	0.242578	0.384508	3.71075	5.25603	ANKZF1	.
Smoothened Signaling Pathway (GO:0007224)	1/35	0.242578	0.384508	3.71075	5.25603	DHH	.
Positive Regulation of Cytokine Production Involved in Immune Response (GO:0002720)	1/35	0.242578	0.384508	3.71075	5.25603	MALT1	.
Positive Regulation of Macromolecule Metabolic Process (GO:0010604)	1/35	0.242578	0.384508	3.71075	5.25603	DTX3L	.
Positive Regulation of Mitotic Nuclear Division (GO:0045840)	1/35	0.242578	0.384508	3.71075	5.25603	PDGFRB	.
Intracellular Receptor Signaling Pathway (GO:0030522)	1/35	0.242578	0.384508	3.71075	5.25603	TRAF3IP3	.
Macrophage Activation (GO:0042116)	1/35	0.242578	0.384508	3.71075	5.25603	CD93	.
Regulation of Cellular Senescence (GO:2000772)	1/35	0.242578	0.384508	3.71075	5.25603	ARG2	.
Negative Regulation of Inflammatory Response (GO:0050728)	2/121	0.247896	0.390712	2.12487	2.96364	SELENOS;ENPP3	.
Negative Regulation of Cell Growth (GO:0030308)	2/121	0.247896	0.390712	2.12487	2.96364	BTG1;SEMA3G	.
Positive Regulation of RNA Splicing (GO:0033120)	1/36	0.248572	0.390712	3.60455	5.01762	RBM3	.
Lytic Vacuole Organization (GO:0080171)	1/36	0.248572	0.390712	3.60455	5.01762	FHIP1B	.
Regulation of D-glucose Import (GO:0046324)	1/36	0.248572	0.390712	3.60455	5.01762	SELENOS	.
Regulation of Blood Circulation (GO:1903522)	1/36	0.248572	0.390712	3.60455	5.01762	S100A1	.
Protein-Containing Complex Assembly (GO:0065003)	4/323	0.252331	0.396068	1.58963	2.18894	ZC3H12A;PDE4DIP;DNAJB14;JCHAIN	.
Defense Response to Bacterium (GO:0042742)	3/221	0.254276	0.398393	1.74229	2.38578	HMGB2;LYZ;JCHAIN	.
Microtubule Polymerization (GO:0046785)	1/37	0.254519	0.398393	3.50425	4.79514	ZNF207	.
DNA Damage Checkpoint Signaling (GO:0000077)	1/38	0.260419	0.399853	3.40936	4.58717	DTX3L	.
Regulation of Erythrocyte Differentiation (GO:0045646)	1/38	0.260419	0.399853	3.40936	4.58717	HMGB2	.
O-glycan Processing (GO:0016266)	1/38	0.260419	0.399853	3.40936	4.58717	CHST4	.
Regulation of Intracellular Protein Transport (GO:0033157)	1/38	0.260419	0.399853	3.40936	4.58717	IFI27	.
Regulation of Microtubule Cytoskeleton Organization (GO:0070507)	1/38	0.260419	0.399853	3.40936	4.58717	MAPRE2	.
Negative Regulation of Transport (GO:0051051)	1/38	0.260419	0.399853	3.40936	4.58717	TRAT1	.
Regulation of Sprouting Angiogenesis (GO:1903670)	1/38	0.260419	0.399853	3.40936	4.58717	S100A1	.
Positive Regulation of Bone Mineralization (GO:0030501)	1/38	0.260419	0.399853	3.40936	4.58717	ACVR2B	.
Positive Regulation of Exocytosis (GO:0045921)	1/38	0.260419	0.399853	3.40936	4.58717	RAB27A	.
Positive Regulation of Immunoglobulin Production (GO:0002639)	1/38	0.260419	0.399853	3.40936	4.58717	DNAJB9	.
Glutathione Metabolic Process (GO:0006749)	1/38	0.260419	0.399853	3.40936	4.58717	ETHE1	.
Positive Regulation of Protein Binding (GO:0032092)	1/38	0.260419	0.399853	3.40936	4.58717	DTX3L	.
Positive Regulation of Reproductive Process (GO:2000243)	1/38	0.260419	0.399853	3.40936	4.58717	HYAL3	.
Regulation of Axonogenesis (GO:0050770)	1/38	0.260419	0.399853	3.40936	4.58717	THY1	.
Regulation of Anatomical Structure Morphogenesis (GO:0022603)	2/127	0.265451	0.405527	2.02226	2.68217	TSPAN12;EPHA2	.
Regulation of Metal Ion Transport (GO:0010959)	1/39	0.266273	0.405527	3.31948	4.39244	CD4	.
Semaphorin-Plexin Signaling Pathway (GO:0071526)	1/39	0.266273	0.405527	3.31948	4.39244	SEMA3G	.
Vacuolar Transport (GO:0007034)	1/39	0.266273	0.405527	3.31948	4.39244	NPC1	.
Positive Regulation of Transferase Activity (GO:0051347)	1/39	0.266273	0.405527	3.31948	4.39244	CD4	.
Regulation of Axon Extension (GO:0030516)	1/39	0.266273	0.405527	3.31948	4.39244	SEMA3G	.
Protein Polyubiquitination (GO:0000209)	3/228	0.269164	0.407759	1.68748	2.21471	IFI27;DTX3L;UBE2J1	.
G2/M Transition of Mitotic Cell Cycle (GO:0000086)	1/40	0.272081	0.407759	3.2342	4.20982	CCNA2	.
Negative Regulation of Sequestering of Calcium Ion (GO:0051283)	1/40	0.272081	0.407759	3.2342	4.20982	ERO1A	.
Nucleic Acid Catabolic Process (GO:0141188)	1/40	0.272081	0.407759	3.2342	4.20982	TREX1	.
Regulation of Protein Targeting to Mitochondrion (GO:1903214)	1/40	0.272081	0.407759	3.2342	4.20982	LMAN1	.
Branching Morphogenesis of an Epithelial Tube (GO:0048754)	1/40	0.272081	0.407759	3.2342	4.20982	EPHA2	.
Ribosome Disassembly (GO:0032790)	1/40	0.272081	0.407759	3.2342	4.20982	ANKZF1	.
Positive Regulation of Cytokinesis (GO:0032467)	1/40	0.272081	0.407759	3.2342	4.20982	INCENP	.
Fibroblast Growth Factor Receptor Signaling Pathway (GO:0008543)	1/40	0.272081	0.407759	3.2342	4.20982	FGFR1	.
Regulation of DNA Binding (GO:0051101)	1/40	0.272081	0.407759	3.2342	4.20982	GZMA	.
Regulation of Apoptotic Signaling Pathway (GO:2001233)	1/40	0.272081	0.407759	3.2342	4.20982	NR4A2	.
Negative Regulation of Cell-Cell Adhesion (GO:0022408)	1/40	0.272081	0.407759	3.2342	4.20982	B4GALNT2	.
Positive Regulation of Defense Response (GO:0031349)	2/130	0.274231	0.410392	1.97456	2.55465	TNIP1;NFKBIZ	.
Apoptotic Process (GO:0006915)	3/232	0.277717	0.410392	1.65767	2.12373	PPP1R15A;IFI27;GZMA	.
Negative Regulation of Kinase Activity (GO:0033673)	1/41	0.277843	0.410392	3.15318	4.03828	THY1	.
Regulation of Mitotic Spindle Organization (GO:0060236)	1/41	0.277843	0.410392	3.15318	4.03828	CCSAP	.
Negative Regulation of Type I Interferon Production (GO:0032480)	1/41	0.277843	0.410392	3.15318	4.03828	UFD1	.
Regulation of Protein Import Into Nucleus (GO:0042306)	1/41	0.277843	0.410392	3.15318	4.03828	ZC3H12A	.
Odontogenesis (GO:0042476)	1/41	0.277843	0.410392	3.15318	4.03828	COL1A2	.
Positive Regulation of DNA Biosynthetic Process (GO:2000573)	1/41	0.277843	0.410392	3.15318	4.03828	PDGFRB	.
Positive Regulation of Actin Filament Polymerization (GO:0030838)	1/41	0.277843	0.410392	3.15318	4.03828	CSF3	.
Connective Tissue Development (GO:0061448)	1/41	0.277843	0.410392	3.15318	4.03828	HYAL3	.
Positive Regulation of Insulin Secretion (GO:0032024)	1/41	0.277843	0.410392	3.15318	4.03828	LRRC8A	.
Protein Localization to Plasma Membrane (GO:0072659)	2/132	0.280083	0.413159	1.94398	2.47405	TMEM88;EPHA2	.
Notch Signaling Pathway (GO:0007219)	1/42	0.28356	0.415028	3.07612	3.87694	DTX3L	.
Axoneme Assembly (GO:0035082)	1/42	0.28356	0.415028	3.07612	3.87694	MAPRE2	.
Response to Hydrogen Peroxide (GO:0042542)	1/42	0.28356	0.415028	3.07612	3.87694	ANKZF1	.
Positive Regulation of Neuron Differentiation (GO:0045666)	1/42	0.28356	0.415028	3.07612	3.87694	FGFR1	.
Positive Regulation of Ossification (GO:0045778)	1/42	0.28356	0.415028	3.07612	3.87694	ACVR2B	.
Keratinocyte Differentiation (GO:0030216)	1/42	0.28356	0.415028	3.07612	3.87694	EPHA2	.
Regulation of GTPase Activity (GO:0043087)	2/134	0.285932	0.416833	1.91434	2.39675	THY1;MAPRE2	.
Regulation of Dendrite Development (GO:0050773)	1/43	0.289231	0.416833	3.00273	3.72497	ZNF296	.
DNA Recombination (GO:0006310)	1/43	0.289231	0.416833	3.00273	3.72497	TREX1	.
Regulation of Epithelial Cell Migration (GO:0010632)	1/43	0.289231	0.416833	3.00273	3.72497	INSL3	.
Neural Crest Cell Development (GO:0014032)	1/43	0.289231	0.416833	3.00273	3.72497	SEMA3G	.
Cell Cycle G2/M Phase Transition (GO:0044839)	1/43	0.289231	0.416833	3.00273	3.72497	CCNA2	.
Release of Sequestered Calcium Ion Into Cytosol (GO:0051209)	1/43	0.289231	0.416833	3.00273	3.72497	ERO1A	.
Positive Regulation of Biomineral Tissue Development (GO:0070169)	1/43	0.289231	0.416833	3.00273	3.72497	ACVR2B	.
Skeletal System Morphogenesis (GO:0048705)	1/43	0.289231	0.416833	3.00273	3.72497	FGFR1	.
Ephrin Receptor Signaling Pathway (GO:0048013)	1/43	0.289231	0.416833	3.00273	3.72497	EPHA2	.
Positive Regulation of Production of Molecular Mediator of Immune Response (GO:0002702)	1/43	0.289231	0.416833	3.00273	3.72497	DNAJB9	.
Regulation of Chemokine Production (GO:0032642)	1/43	0.289231	0.416833	3.00273	3.72497	EGR1	.
Protein Localization to Cell Periphery (GO:1990778)	2/136	0.291775	0.419963	1.88557	2.32259	TMEM88;EPHA2	.
Regulation of Protein Phosphorylation (GO:0001932)	2/137	0.294695	0.42064	1.87151	2.28664	CD4;ZC3H12A	.
Negative Regulation of Protein Modification Process (GO:0031400)	1/44	0.294858	0.42064	2.93275	3.58165	ZC3H12A	.
Regulation of Ossification (GO:0030278)	1/44	0.294858	0.42064	2.93275	3.58165	ACVR2B	.
Response to Unfolded Protein (GO:0006986)	1/44	0.294858	0.42064	2.93275	3.58165	TRAM1	.
Positive Regulation of Cell Cycle G1/S Phase Transition (GO:1902808)	1/44	0.294858	0.42064	2.93275	3.58165	CCND2	.
Substantia Nigra Development (GO:0021762)	1/44	0.294858	0.42064	2.93275	3.58165	S100A1	.
Lysosome Organization (GO:0007040)	1/44	0.294858	0.42064	2.93275	3.58165	FHIP1B	.
Regulation of Nervous System Development (GO:0051960)	1/45	0.300441	0.425374	2.86595	3.44632	HMGB2	.
Regulation of Nitric Oxide Biosynthetic Process (GO:0045428)	1/45	0.300441	0.425374	2.86595	3.44632	ZC3H12A	.
Cellular Response to Ketone (GO:1901655)	1/45	0.300441	0.425374	2.86595	3.44632	SCNN1D	.
Collagen Fibril Organization (GO:0030199)	1/45	0.300441	0.425374	2.86595	3.44632	COL1A2	.
Positive Regulation of Cell-Matrix Adhesion (GO:0001954)	1/45	0.300441	0.425374	2.86595	3.44632	THY1	.
Negative Regulation of Biosynthetic Process (GO:0009890)	1/45	0.300441	0.425374	2.86595	3.44632	ZC3H12A	.
Protein Autophosphorylation (GO:0046777)	2/140	0.303444	0.427048	1.83055	2.18303	PDGFRB;FGFR1	.
T Cell Differentiation (GO:0030217)	1/46	0.30598	0.427048	2.80212	3.31837	CD4	.
Regulation of Osteoclast Differentiation (GO:0045670)	1/46	0.30598	0.427048	2.80212	3.31837	TM4SF19	.
Neurotransmitter Transport (GO:0006836)	1/46	0.30598	0.427048	2.80212	3.31837	SH2D3C	.
Regulation of Transport (GO:0051049)	1/46	0.30598	0.427048	2.80212	3.31837	TRAT1	.
Central Nervous System Neuron Differentiation (GO:0021953)	1/46	0.30598	0.427048	2.80212	3.31837	NR4A2	.
Positive Regulation of Nucleocytoplasmic Transport (GO:0046824)	1/46	0.30598	0.427048	2.80212	3.31837	ZC3H12A	.
Macromolecule Catabolic Process (GO:0009057)	1/46	0.30598	0.427048	2.80212	3.31837	DENND3	.
Mononuclear Cell Differentiation (GO:1903131)	1/46	0.30598	0.427048	2.80212	3.31837	CD4	.
Regulation of Cell-Cell Adhesion (GO:0022407)	1/46	0.30598	0.427048	2.80212	3.31837	B4GALNT2	.
Regulation of Cell-Substrate Adhesion (GO:0010810)	1/46	0.30598	0.427048	2.80212	3.31837	THY1	.
Regulation of Cell Adhesion (GO:0030155)	2/142	0.309267	0.427048	1.80421	2.11734	IBSP;EPHA2	.
Negative Regulation of Cold-Induced Thermogenesis (GO:0120163)	1/47	0.311476	0.427048	2.74107	3.19728	ACVR2B	.
BMP Signaling Pathway (GO:0030509)	1/47	0.311476	0.427048	2.74107	3.19728	ACVR2B	.
DNA Integrity Checkpoint Signaling (GO:0031570)	1/47	0.311476	0.427048	2.74107	3.19728	DTX3L	.
Regulation of mRNA Catabolic Process (GO:0061013)	1/47	0.311476	0.427048	2.74107	3.19728	ZC3H12A	.
Bicellular Tight Junction Assembly (GO:0070830)	1/47	0.311476	0.427048	2.74107	3.19728	CLDN15	.
Cellular Defense Response (GO:0006968)	1/47	0.311476	0.427048	2.74107	3.19728	TRAT1	.
Cellular Response to Type II Interferon (GO:0071346)	1/47	0.311476	0.427048	2.74107	3.19728	IFNGR2	.
Positive Regulation of T Cell Mediated Immunity (GO:0002711)	1/47	0.311476	0.427048	2.74107	3.19728	MALT1	.
Positive Regulation of Chromosome Organization (GO:2001252)	1/47	0.311476	0.427048	2.74107	3.19728	NCAPG2	.
Double-Strand Break Repair via Nonhomologous End Joining (GO:0006303)	1/47	0.311476	0.427048	2.74107	3.19728	HMGB2	.
Positive Regulation of mRNA Catabolic Process (GO:0061014)	1/47	0.311476	0.427048	2.74107	3.19728	ZC3H12A	.
Positive Regulation of miRNA Transcription (GO:1902895)	1/47	0.311476	0.427048	2.74107	3.19728	EGR1	.
Positive Regulation of Pattern Recognition Receptor Signaling Pathway (GO:0062208)	1/47	0.311476	0.427048	2.74107	3.19728	OASL	.
Intracellular Glucose Homeostasis (GO:0001678)	1/47	0.311476	0.427048	2.74107	3.19728	LRRC8A	.
Regulation of Exocytosis (GO:0017157)	1/48	0.316928	0.429817	2.68261	3.08254	RAB27A	.
Negative Regulation of Response to Biotic Stimulus (GO:0002832)	1/48	0.316928	0.429817	2.68261	3.08254	TREX1	.
Oligosaccharide Metabolic Process (GO:0009311)	1/48	0.316928	0.429817	2.68261	3.08254	B4GALNT2	.
Cellular Response to Chemokine (GO:1990869)	1/48	0.316928	0.429817	2.68261	3.08254	ZC3H12A	.
Positive Regulation of Kinase Activity (GO:0033674)	1/48	0.316928	0.429817	2.68261	3.08254	CD4	.
Positive Regulation of Leukocyte Cell-Cell Adhesion (GO:1903039)	1/48	0.316928	0.429817	2.68261	3.08254	THY1	.
Positive Regulation of Osteoblast Differentiation (GO:0045669)	1/48	0.316928	0.429817	2.68261	3.08254	ACVR2B	.
Positive Regulation of Peptide Hormone Secretion (GO:0090277)	1/48	0.316928	0.429817	2.68261	3.08254	LRRC8A	.
Post-Translational Protein Modification (GO:0043687)	1/48	0.316928	0.429817	2.68261	3.08254	CCNA2	.
Protein Glycosylation (GO:0006486)	2/145	0.317982	0.430728	1.76609	2.02352	DPAGT1;NPC1	.
Positive Regulation of MAPK Cascade (GO:0043410)	4/362	0.320955	0.433501	1.41363	1.60652	PDGFRB;CD4;ZC3H12A;FGFR1	.
Regulation of Insulin Receptor Signaling Pathway (GO:0046626)	1/49	0.322337	0.433501	2.62659	2.97372	ZBTB7B	.
Epidermal Growth Factor Receptor Signaling Pathway (GO:0007173)	1/49	0.322337	0.433501	2.62659	2.97372	HBEGF	.
Translational Elongation (GO:0006414)	1/49	0.322337	0.433501	2.62659	2.97372	ANKZF1	.
Positive Regulation of Smooth Muscle Cell Proliferation (GO:0048661)	1/49	0.322337	0.433501	2.62659	2.97372	PDGFRB	.
Negative Regulation of TORC1 Signaling (GO:1904262)	1/49	0.322337	0.433501	2.62659	2.97372	NPC1	.
Regulation of Cold-Induced Thermogenesis (GO:0120161)	2/148	0.326672	0.437068	1.72954	1.935	ZBTB7B;ACVR2B	.
Negative Regulation of Phosphorylation (GO:0042326)	1/50	0.327704	0.437068	2.57286	2.8704	ZC3H12A	.
Negative Regulation of Protein Binding (GO:0032091)	1/50	0.327704	0.437068	2.57286	2.8704	ATP2A2	.
Nuclear Export (GO:0051168)	1/50	0.327704	0.437068	2.57286	2.8704	MALT1	.
Nucleocytoplasmic Transport (GO:0006913)	1/50	0.327704	0.437068	2.57286	2.8704	MALT1	.
Positive Regulation of Lymphocyte Activation (GO:0051251)	1/50	0.327704	0.437068	2.57286	2.8704	THY1	.
Negative Regulation of ERK1 and ERK2 Cascade (GO:0070373)	1/50	0.327704	0.437068	2.57286	2.8704	TNIP1	.
Regulation of Cell Migration (GO:0030334)	5/479	0.328357	0.437421	1.33532	1.48708	PDGFRB;SEMA3G;THY1;EPHA2;HBEGF	.
Phosphate-Containing Compound Metabolic Process (GO:0006796)	2/150	0.33245	0.439488	1.70599	1.87875	SLC20A1;ENPP3	.
Autophagosome Maturation (GO:0097352)	1/51	0.333028	0.439488	2.52127	2.77221	ATP2A2	.
Carboxylic Acid Transmembrane Transport (GO:1905039)	1/51	0.333028	0.439488	2.52127	2.77221	LRRC8A	.
Cardiac Muscle Tissue Development (GO:0048738)	1/51	0.333028	0.439488	2.52127	2.77221	MSX2	.
Response to Glucose (GO:0009749)	1/51	0.333028	0.439488	2.52127	2.77221	SELENOS	.
Transcription Initiation-Coupled Chromatin Remodeling (GO:0045815)	1/51	0.333028	0.439488	2.52127	2.77221	EGR1	.
Macromolecule Glycosylation (GO:0043413)	1/51	0.333028	0.439488	2.52127	2.77221	NPC1	.
Myofibril Assembly (GO:0030239)	1/51	0.333028	0.439488	2.52127	2.77221	PDGFRB	.
Negative Regulation of Protein Ubiquitination (GO:0031397)	1/52	0.338311	0.444378	2.47171	2.67882	DTX3L	.
Glycoprotein Metabolic Process (GO:0009100)	1/52	0.338311	0.444378	2.47171	2.67882	TNIP1	.
Intrinsic Apoptotic Signaling Pathway in Response to DNA Damage (GO:0008630)	1/52	0.338311	0.444378	2.47171	2.67882	EPHA2	.
Regulation of Cell Development (GO:0060284)	1/52	0.338311	0.444378	2.47171	2.67882	HMGB2	.
Positive Regulation of ERK1 and ERK2 Cascade (GO:0070374)	2/153	0.34109	0.447507	1.67185	1.79825	PDGFRB;CD4	.
B Cell Differentiation (GO:0030183)	1/53	0.343552	0.44761	2.42406	2.5899	DNAJB9	.
Regulation of Focal Adhesion Assembly (GO:0051893)	1/53	0.343552	0.44761	2.42406	2.5899	THY1	.
Antibacterial Humoral Response (GO:0019731)	1/53	0.343552	0.44761	2.42406	2.5899	JCHAIN	.
Regulation of Smoothened Signaling Pathway (GO:0008589)	1/53	0.343552	0.44761	2.42406	2.5899	DHH	.
Cytoplasmic Microtubule Organization (GO:0031122)	1/53	0.343552	0.44761	2.42406	2.5899	PDE4DIP	.
Positive Regulation of Small GTPase Mediated Signal Transduction (GO:0051057)	1/53	0.343552	0.44761	2.42406	2.5899	MAPRE2	.
Apical Junction Assembly (GO:0043297)	1/54	0.348751	0.450737	2.3782	2.50519	CLDN15	.
Regulation of Signal Transduction by P53 Class Mediator (GO:1901796)	1/54	0.348751	0.450737	2.3782	2.50519	PPP1R15A	.
Regulation of Smooth Muscle Cell Proliferation (GO:0048660)	1/54	0.348751	0.450737	2.3782	2.50519	PDGFRB	.
Cellular Response to BMP Stimulus (GO:0071773)	1/54	0.348751	0.450737	2.3782	2.50519	ACVR2B	.
Positive Regulation of Chemokine Production (GO:0032722)	1/54	0.348751	0.450737	2.3782	2.50519	EGR1	.
Tight Junction Assembly (GO:0120192)	1/54	0.348751	0.450737	2.3782	2.50519	CLDN15	.
mRNA Destabilization (GO:0061157)	1/54	0.348751	0.450737	2.3782	2.50519	ZC3H12A	.
Regulation of Cytokine Production Involved in Inflammatory Response (GO:1900015)	1/55	0.35391	0.454279	2.33404	2.4244	ZC3H12A	.
Rho Protein Signal Transduction (GO:0007266)	1/55	0.35391	0.454279	2.33404	2.4244	COL1A2	.
Regulation of Metabolic Process (GO:0019222)	1/55	0.35391	0.454279	2.33404	2.4244	SELENOS	.
Endoplasmic Reticulum Organization (GO:0007029)	1/55	0.35391	0.454279	2.33404	2.4244	TRAM1	.
Positive Regulation of Protein Localization to Plasma Membrane (GO:1903078)	1/55	0.35391	0.454279	2.33404	2.4244	EPHA2	.
Metaphase Chromosome Alignment (GO:0051310)	1/55	0.35391	0.454279	2.33404	2.4244	INCENP	.
Adenylate Cyclase-Inhibiting G Protein-Coupled Receptor Signaling Pathway (GO:0007193)	1/56	0.359028	0.457203	2.29149	2.34729	INSL3	.
Regulation of Protein Localization to Nucleus (GO:1900180)	1/56	0.359028	0.457203	2.29149	2.34729	DTX3L	.
Nucleosome Assembly (GO:0006334)	1/56	0.359028	0.457203	2.29149	2.34729	HMGB2	.
Cellular Response to Alcohol (GO:0097306)	1/56	0.359028	0.457203	2.29149	2.34729	SCNN1D	.
Cellular Response to Fibroblast Growth Factor Stimulus (GO:0044344)	1/56	0.359028	0.457203	2.29149	2.34729	FGFR1	.
Response to Peptide Hormone (GO:0043434)	1/56	0.359028	0.457203	2.29149	2.34729	ZBTB7B	.
Epidermal Cell Differentiation (GO:0009913)	1/56	0.359028	0.457203	2.29149	2.34729	EPHA2	.
Negative Regulation of Innate Immune Response (GO:0045824)	1/57	0.364106	0.461584	2.25045	2.27366	TREX1	.
Negative Regulation of Response to Stimulus (GO:0048585)	1/57	0.364106	0.461584	2.25045	2.27366	THY1	.
Cartilage Development (GO:0051216)	1/57	0.364106	0.461584	2.25045	2.27366	HYAL3	.
Positive Regulation of Protein Localization to Cell Periphery (GO:1904377)	1/57	0.364106	0.461584	2.25045	2.27366	EPHA2	.
ERBB Signaling Pathway (GO:0038127)	1/58	0.369144	0.464314	2.21086	2.20327	HBEGF	.
Regulation of Mitotic Nuclear Division (GO:0007088)	1/58	0.369144	0.464314	2.21086	2.20327	PDGFRB	.
Regulation of Multicellular Organismal Development (GO:2000026)	1/58	0.369144	0.464314	2.21086	2.20327	CCSAP	.
Intracellular Iron Ion Homeostasis (GO:0006879)	1/58	0.369144	0.464314	2.21086	2.20327	ACVR2B	.
Positive Regulation of Type II Interferon Production (GO:0032729)	1/58	0.369144	0.464314	2.21086	2.20327	CD244	.
Muscle Organ Development (GO:0007517)	1/58	0.369144	0.464314	2.21086	2.20327	HBEGF	.
Regulation of Calcium Ion Transport (GO:0051924)	1/58	0.369144	0.464314	2.21086	2.20327	CD4	.
Positive Regulation of Transcription by RNA Polymerase II (GO:0045944)	9/983	0.373761	0.468509	1.1701	1.15154	NR4A2;KLF10;EGR1;CSF3;TNIP1;ZC3H12A;MAFF;IRF2;HMGB2	.
Regulation of Embryonic Development (GO:0045995)	1/59	0.374142	0.468509	2.17263	2.13596	CCSAP	.
Protein Polymerization (GO:0051258)	1/59	0.374142	0.468509	2.17263	2.13596	ZNF207	.
Regulation of Bone Mineralization (GO:0030500)	1/59	0.374142	0.468509	2.17263	2.13596	ACVR2B	.
Negative Regulation of Intrinsic Apoptotic Signaling Pathway (GO:2001243)	1/60	0.379101	0.472619	2.1357	2.07153	SELENOS	.
Negative Regulation of Protein Kinase Activity (GO:0006469)	1/60	0.379101	0.472619	2.1357	2.07153	THY1	.
Phosphatidylcholine Metabolic Process (GO:0046470)	1/60	0.379101	0.472619	2.1357	2.07153	SH2D3C	.
Post-Transcriptional Regulation of Gene Expression (GO:0010608)	1/60	0.379101	0.472619	2.1357	2.07153	RBM3	.
Phospholipid Transport (GO:0015914)	1/61	0.384021	0.477695	2.1	2.00982	OSBP	.
Vesicle Organization (GO:0016050)	1/61	0.384021	0.477695	2.1	2.00982	FHIP1B	.
ATP Metabolic Process (GO:0046034)	1/62	0.388902	0.481112	2.06547	1.95069	ENPP3	.
Antiviral Innate Immune Response (GO:0140374)	1/62	0.388902	0.481112	2.06547	1.95069	OASL	.
Regulation of Phagocytosis (GO:0050764)	1/62	0.388902	0.481112	2.06547	1.95069	RAB27A	.
protein-DNA Complex Assembly (GO:0065004)	1/62	0.388902	0.481112	2.06547	1.95069	HMGB2	.
Mitotic Cytokinesis (GO:0000281)	1/62	0.388902	0.481112	2.06547	1.95069	INCENP	.
[truncated: 216 more rows]

## Sheet: Table S5
Supplementary File, Table S5. The complete list of the hub genes in brown module along with KME values.
[truncated: 159 more rows]

[truncated: 1 more sheets: Table S6]
